# Supplementary material for: Integrated Analysis of Cecal Microbiome and Metabolome Revealed Different Inflammatory Reponses to Salmonella Enterica Serovar Enteritidis Between Reciprocal Crosses of Chicken
Source: Research Square preprint supplement (doi:10.21203/rs.3.rs-923110/v1), 2021-10-05
Supplement: Supplementary file 1 [file 38a0b1b0b4a79e10d07d31d8.xlsx]

## Sheet: Sheet1
Metabolite	KEGG Compound ID	Library ID	Formula	CC1	CC6	CC11	CC12	CT1	CT3	CT6	CT8	CT10	CT11	CT12	RC1	RC5	RC6	RC7	RC8	RC9	RT1	RT2	RT4	RT5	RT6	RT8	RT11	QC01	QC02	QC03	QC04	ID	Metab ID	M/Z	Retention time	Mode	Adducts	Fragmentation Score	Theoretical Fragmentation Score	Mass Error	CAS ID	RSD
metab_0	-	-	-	5.6349	4.2069	5.8056	5.9646	6.2018	5.5712	5.7395	5.5791	5.1084	6.0636	5.3022	5.5491	5.1933	6.2152	6.0795	5.3418	5.3038	5.6931	6.0392	5.4198	5.3829	5.3795	5.6472	5.3601	5.7393	5.7283	5.7245	5.7236	pos_1	metab_0	373.274	6.569	pos	-	-	-	-	-	0.0167244
metab_1	-	-	-	5.2118	5.1416	5.1054	5.0087	5.1137	5.0469	5.0823	5.0214	5.2358	5.1885	5.1117	5.55	5.5039	5.5057	5.5111	5.4589	5.4976	5.4846	5.4668	5.4699	5.5233	5.4281	5.4553	5.5304	5.317	5.3209	5.307	5.3224	pos_2	metab_1	211.108	0.6653	pos	-	-	-	-	-	0.0158383
PC(16:0/0:0)[U]	-	-	C24H50NO7P	5.8218	5.8667	5.6107	5.8101	5.8966	5.6146	6.0167	5.0685	5.2749	5.2403	5.3741	6.113	6.2597	6.1134	6.1982	6.5677	5.8633	6.9698	6.6205	7.2056	6.7631	5.8125	6.6345	6.9648	6.4078	6.4081	6.3997	6.4062	pos_3	metab_2	496.34	8.2812	pos	M+H, 2M+Na, 2M+H, M+Na, M+K, M+H-H2O	78.8	-	0.340752	-	0.00898517
metab_3	-	-	-	4.2505	7.2161	7.2242	7.1809	6.6147	7.2624	7.0727	7.259	5.7429	4.1494	6.4121	2.7766	3.6535	2.6259	3.1967	3.2485	3.0917	3.8804	4.0164	3.5977	3.3407	3.7387	3.3138	3.5325	6.8932	6.8901	6.8891	6.8929	pos_4	metab_3	407.313	9.7405	pos	-	-	-	-	-	0.00468409
metab_4	-	-	-	6.2678	6.1219	6.1173	5.9594	5.575	5.5311	6.1531	5.8371	5.8273	5.8234	5.5218	5.9775	6.1386	6.1363	6.1348	6.2682	6.0655	6.575	6.4654	6.6461	6.4461	6.2544	6.4152	6.3457	6.1861	6.1863	6.1758	6.1835	pos_5	metab_4	488.311	9.3217	pos	-	-	-	-	-	0.0113297
metab_5	-	-	-	5.4814	5.4876	5.3644	5.0241	5.54	5.4145	5.4762	5.4348	5.5736	5.4047	5.4438	5.7597	5.8273	5.8325	5.769	5.7624	5.8637	5.7938	5.6945	5.7236	5.876	5.6467	5.7345	5.7607	5.5896	5.5951	5.5746	5.5967	pos_6	metab_5	227.139	0.6653	pos	-	-	-	-	-	0.0229984
metab_6	-	-	-	5.6743	5.6093	5.4532	5.0655	5.4331	5.3541	5.6137	5.3393	5.5885	5.614	5.41	5.5134	5.4879	5.4681	5.4624	5.4268	5.586	5.4766	5.4973	5.4927	5.5225	5.4784	5.4849	5.5036	5.463	5.4727	5.475	5.4867	pos_7	metab_6	209.129	1.331	pos	-	-	-	-	-	0.0224081
metab_7	-	-	-	4.7623	5.5935	5.8923	6.8742	5.9743	7.1624	6.9981	6.5597	5.866	4.7068	5.4975	4.2091	4.5326	4.0243	3.7651	3.4319	4.4606	3.4461	3.7847	4.0368	3.4411	4.6235	3.8877	3.9053	6.7014	6.7017	6.6945	6.6964	pos_8	metab_7	529.35	10.139	pos	-	-	-	-	-	0.00821942
metab_8	-	-	-	5.7166	5.6621	5.6145	5.3882	5.6484	5.6009	5.6213	5.5997	5.7772	5.7297	5.5911	5.9186	5.916	5.9253	5.9116	5.8332	5.9315	5.8538	5.8658	5.8592	5.9244	5.8067	5.8668	5.8881	5.7345	5.7449	5.742	5.7464	pos_9	metab_8	142.086	0.6653	pos	-	-	-	-	-	0.0120936
metab_9	-	-	-	5.3099	5.214	5.1905	5.0108	5.2553	5.1448	5.1824	5.1616	5.3072	5.3309	5.2436	5.766	5.8105	5.7155	5.7705	5.6978	5.7842	5.728	5.6698	5.6171	5.7501	5.6657	5.7477	5.6726	5.5239	5.5276	5.5238	5.5391	pos_10	metab_9	227.103	0.6653	pos	-	-	-	-	-	0.01675
metab_10	-	-	-	5.0078	5.1078	4.838	4.4939	4.4886	4.1978	4.488	4.5151	4.779	4.6613	4.5133	4.7932	4.8291	4.7996	4.8044	5.3298	5.1282	5.5092	5.5488	5.7642	5.0631	5.1942	5.1148	5.8208	5.1157	5.1369	5.1456	5.1474	pos_11	metab_10	343.222	7.8814	pos	-	-	-	-	-	0.0331096
metab_11	-	-	-	5.2171	5.1635	5.0219	5.4182	5.2089	5.0939	5.3737	5.1418	5.2057	5.4423	5.199	5.6018	5.5992	5.3173	5.3585	5.4945	5.516	5.4494	5.3601	5.3949	5.5114	5.4095	5.4484	5.4614	5.3192	5.3352	5.3379	5.3397	pos_12	metab_11	275.124	0.6653	pos	-	-	-	-	-	0.0213737
metab_12	-	-	-	5.7402	5.5899	5.6151	5.8735	5.7818	5.7759	5.8741	5.9143	5.8175	5.7647	5.7909	5.7582	5.7414	5.7506	5.7343	5.6698	5.7969	5.7148	5.632	5.6462	5.6956	5.604	5.6493	5.6743	5.7127	5.7129	5.7157	5.7218	pos_13	metab_12	138.055	0.6653	pos	-	-	-	-	-	0.00975654
metab_13	-	-	-	5.6214	5.6123	5.5062	5.2893	5.6261	5.5484	5.5727	5.5902	5.725	5.6772	5.6204	5.8862	5.9153	5.8321	5.8774	5.8729	5.885	5.8576	5.8739	5.7957	5.8784	5.8443	5.8721	5.8356	5.7081	5.7086	5.7167	5.7188	pos_14	metab_13	130.086	0.9149	pos	-	-	-	-	-	0.0126914
metab_14	-	-	-	6.2706	6.3107	5.7258	5.3932	6.1207	6.1044	6.1479	5.9183	6.1425	6.4847	5.9059	5.9419	5.883	5.843	5.733	5.9763	6.0412	5.9592	5.9665	6.055	6.0953	5.9672	6.0051	6.0076	6.0202	6.0209	6.0091	5.9946	pos_15	metab_14	651.36	3.4802	pos	-	-	-	-	-	0.0281125
metab_15	-	-	-	5.3632	5.2663	5.1354	5.1157	5.2551	5.2117	5.1553	5.121	5.4168	5.3607	5.2093	5.4915	5.4822	5.4686	5.5112	5.4031	5.5081	5.4598	5.4364	5.375	5.4811	5.4087	5.4675	5.4007	5.3265	5.3267	5.3334	5.349	pos_16	metab_15	228.087	0.9149	pos	-	-	-	-	-	0.0245946
metab_16	-	-	-	4.5115	5.3065	5.4702	7.2183	5.5772	6.47	6.8742	6.6483	5.6225	4.5662	5.3019	4.1302	4.3439	4.0134	3.9863	3.7725	3.8371	3.8016	3.8521	3.8136	3.9226	4.546	3.9476	3.8264	6.4414	6.4417	6.4316	6.4334	pos_17	metab_16	555.366	10.1614	pos	-	-	-	-	-	0.0121054
metab_17	-	-	-	4.9265	4.5966	4.8506	4.8803	4.8813	5.0444	4.72	5.2252	5.08	4.5433	4.8179	3.4472	3.9922	4.8761	4.746	4.8121	3.5981	4.4891	3.5434	4.528	4.7523	4.752	4.4268	4.45	4.7537	4.6918	4.6906	4.6924	pos_18	metab_17	975.515	4.8371	pos	-	-	-	-	-	0.0740075
metab_18	-	-	-	4.1456	6.8417	6.6902	6.3132	6.0474	6.6577	6.3828	6.7806	4.8301	4.3536	5.806	3.095	3.888	3.2334	2.5538	1.9541	2.9696	2.382	2.877	2.6694	2.3356	3.8308	2.8969	2.0314	6.1542	6.161	6.1402	6.1531	pos_19	metab_18	435.345	10.139	pos	-	-	-	-	-	0.019942
metab_19	-	-	-	4.5514	7.3662	7.3421	7.1801	6.9866	7.44	7.3403	7.3016	6.0641	4.9433	6.5586	4.1501	4.5392	3.8406	3.7706	3.6107	3.5818	3.5345	3.9085	3.4322	3.3637	4.7028	3.7523	3.698	7.1059	7.1016	7.1058	7.0824	pos_20	metab_19	421.329	9.9399	pos	-	-	-	-	-	0.025434
metab_20	-	-	-	3.9874	7.0036	7.2828	7.1185	6.5794	7.2603	7.1992	7.0708	5.9136	3.9254	6.2193	2.749	3.394	3.1288	2.2441	2.7773	3.0904	2.2272	3.324	2.3056	2.2513	3.8033	2.2568	3.6577	6.7924	6.7774	6.7821	6.7788	pos_21	metab_20	393.298	9.5219	pos	-	-	-	-	-	0.0156282
metab_21	-	-	-	3.6223	6.6104	6.9506	6.5872	5.9187	6.7738	6.6444	6.4957	4.815	3.8163	5.6996	3.2263	3.3313	3.0733	2.8313	2.8726	3.0128	3.33	2.9503	3.0641	3.1284	3.1057	2.7565	3.2453	6.2072	6.2106	6.2103	6.1736	pos_22	metab_21	445.329	9.6517	pos	-	-	-	-	-	0.040528
metab_22	-	-	-	2.1186	6.8064	7.008	7.1046	6.3425	7.0761	7.2011	7.1492	5.5222	3.5049	5.7308	2.9904	3.4445	3.2372	3.057	3.2356	2.3985	2.7662	2.0715	2.6322	2.9329	2.9606	2.8091	2.1178	6.5693	6.5638	6.5692	6.5572	pos_23	metab_22	419.313	9.5654	pos	-	-	-	-	-	0.0131418
9R,10S-epoxy-stearic acid	-	LMFA02000002	C18H34O3	6.1301	6.4659	5.9838	5.2682	4.7606	5.2263	3.934	6.3808	5.8079	4.5508	6.1851	4.141	4.1353	4.0593	4.0069	4.3935	4.1039	4.4813	4.1991	4.5689	4.3035	4.3276	3.9863	4.7648	5.7415	5.7432	5.7471	5.7528	pos_24	metab_23	321.24	8.3259	pos	M+H, M+2Na-H, M+Na, M+CH3OH+H, M+H-H2O	61.2	-	-0.294532	-	0.0115604
metab_24	-	-	-	5.8873	5.8684	5.8271	5.8666	5.9201	5.8277	5.8662	5.82	5.9682	5.949	5.9285	5.9476	5.9414	5.9308	5.9509	5.9256	5.9127	5.9128	5.9872	5.8903	5.882	5.9539	5.9376	5.9109	5.9063	5.8996	5.9016	5.9011	pos_25	metab_24	111.117	9.0708	pos	-	-	-	-	-	0.00668083
metab_25	-	-	-	5.5139	5.5067	5.4704	5.5026	5.526	5.4763	5.4833	5.4787	5.5632	5.5795	5.5602	5.5419	5.5828	5.585	5.5625	5.5478	5.5175	5.5434	5.5876	5.5116	5.4953	5.5588	5.5441	5.5176	5.5242	5.5221	5.5174	5.5117	pos_26	metab_25	97.1016	9.0708	pos	-	-	-	-	-	0.0127375
metab_26	-	-	-	5.424	5.3322	5.2709	5.2277	5.3969	5.4336	5.3686	5.3119	5.531	5.4369	5.383	5.4701	5.7117	5.4392	5.4262	5.3174	5.3757	5.4326	5.401	5.4021	5.3015	5.369	5.4365	5.3631	5.3452	5.3684	5.3802	5.3865	pos_27	metab_26	126.091	0.9149	pos	-	-	-	-	-	0.041394
metab_27	-	-	-	5.6188	5.3735	5.5137	5.8164	5.6205	5.6202	5.6895	5.7934	5.6539	5.5822	5.6524	5.6655	5.6566	5.6627	5.6996	5.6123	5.734	5.6514	5.596	5.6173	5.5689	5.5361	5.6085	5.6232	5.5958	5.6091	5.6089	5.6106	pos_28	metab_27	144.066	0.6269	pos	-	-	-	-	-	0.0157484
metab_28	-	-	-	5.6715	5.5923	5.5795	5.6028	5.6421	5.583	5.5737	5.6375	5.682	5.7196	5.693	5.7106	5.7224	5.7337	5.7229	5.6716	5.7185	5.7112	5.6547	5.6702	5.6788	5.7	5.6713	5.67	5.6315	5.6318	5.6273	5.6242	pos_29	metab_28	131.974	0.0175	pos	-	-	-	-	-	0.00841302
metab_29	-	-	-	6.229	5.739	5.9998	6.2914	6.212	6.1762	6.1153	5.997	6.303	6.3169	6.2587	6.3818	6.3017	6.2696	6.2915	6.1452	6.31	6.0995	5.9783	6.0491	6.117	6.2841	6.2416	6.1801	6.1774	6.1815	6.1811	6.1581	pos_30	metab_29	128.019	0.4927	pos	-	-	-	-	-	0.0252621
metab_30	-	-	-	5.8116	5.7843	5.8199	5.7539	5.7961	5.7115	5.7996	5.7678	5.8828	5.8427	5.8942	6.0275	5.9369	5.9014	5.9131	5.9072	6.0132	5.9142	5.9166	5.9176	5.9152	5.8584	5.9243	5.8949	5.8415	5.8514	5.8556	5.8574	pos_31	metab_30	158.081	0.5905	pos	-	-	-	-	-	0.016329
Delta-Valerolactam	-	-	C5H9NO	5.5299	5.3774	5.3909	5.4357	5.467	5.4945	5.3616	5.5289	5.5323	5.5479	5.5323	5.5561	5.5383	5.5583	5.5368	5.4554	5.485	5.4943	5.4594	5.4905	5.5358	5.4866	5.5492	5.5155	5.4478	5.4525	5.4446	5.4465	pos_32	metab_31	100.076	0.6653	pos	M+H, M+ACN+Na, 2M+Na, M+NH4	63.8	-	4.49561	-	0.00772203
metab_32	-	-	-	5.6939	5.6687	5.5769	5.3501	5.6345	5.5056	5.5615	5.5674	5.7739	5.7354	5.5815	6.1741	6.2011	6.1046	6.1303	6.1121	6.1205	6.0504	6.0165	5.981	6.106	6.0254	6.0716	6.0501	5.8802	5.8945	5.8773	5.8845	pos_33	metab_32	257.113	0.6653	pos	-	-	-	-	-	0.0174565
metab_33	-	-	-	5.3811	5.3308	5.2292	5.0744	5.3179	5.206	5.2331	5.2563	5.3132	5.4056	5.2677	5.6197	5.6221	5.5752	5.6241	5.5851	5.6115	5.5391	5.4628	5.4789	5.6002	5.4798	5.5443	5.5506	5.3928	5.3933	5.3926	5.3993	pos_34	metab_33	241.118	0.6653	pos	-	-	-	-	-	0.00741811
metab_34	-	-	-	5.2845	5.256	5.2042	5.0283	5.2645	5.1395	5.2581	5.1886	5.3317	5.3459	5.2093	5.5473	5.5151	5.4626	5.4992	5.4611	5.5438	5.4534	5.3915	5.435	5.4797	5.3979	5.4618	5.4747	5.3456	5.3478	5.3454	5.3548	pos_35	metab_34	229.118	0.6653	pos	-	-	-	-	-	0.0101772
Isonicotinic acid	C07446;C16623	HMDB0060665	C6H5NO2	5.875	5.7779	5.6153	5.7007	6.0033	5.9071	5.7955	5.9578	6.0809	6.0099	5.9864	5.6903	5.6708	5.5981	5.6129	5.6431	5.7272	5.6739	5.802	5.6437	5.7505	5.74	5.7136	5.5779	5.7447	5.7449	5.7626	5.7593	pos_36	metab_35	124.04	0.9149	pos	M+H, M+ACN+H, M+CH3OH+H, M+NH4	88.7	-	1.78117	55-22-1	0.0216539
metab_36	-	-	-	5.441	5.2864	5.3173	5.0912	5.3003	5.2148	5.0345	5.2178	5.3355	5.4311	5.3369	5.3299	5.4078	5.2839	5.2749	5.2985	5.3359	5.3968	5.3488	5.2859	5.4031	5.352	5.3179	5.3358	5.2601	5.2605	5.2779	5.2722	pos_37	metab_36	114.092	0.9149	pos	-	-	-	-	-	0.0204047
metab_37	-	-	-	5.1697	5.0439	5.0212	4.9832	5.1871	5.1552	5.0843	5.1622	5.2157	5.2353	5.1239	5.2829	5.3357	5.275	5.2612	5.2244	5.2639	5.2468	5.2443	5.1421	5.2334	5.1922	5.2664	5.1989	5.1601	5.1441	5.1548	5.1633	pos_38	metab_37	114.055	0.9149	pos	-	-	-	-	-	0.0192479
metab_38	-	-	-	5.2363	5.099	5.168	5.4154	5.1968	5.2078	5.2508	5.394	5.3776	5.2012	5.2361	5.2322	5.1706	5.1945	5.2384	5.1507	5.2728	5.2125	5.1288	5.1717	5.1967	5.1341	5.2128	5.1973	5.2126	5.1916	5.2124	5.2115	pos_39	metab_38	246.097	0.609	pos	-	-	-	-	-	0.0234222
metab_39	-	-	-	5.0239	5.1355	4.8653	4.3227	5.0015	4.8223	4.8525	4.9155	4.9814	4.9308	4.9614	4.9566	5.2226	5.2389	5.2217	5.0196	5.1578	5.0776	4.9822	4.9306	4.9769	5.0099	5.0373	4.9943	4.9541	4.9612	4.9729	4.9559	pos_40	metab_39	447.257	0.57	pos	-	-	-	-	-	0.0196225
metab_40	-	-	-	5.0721	5.0277	4.9526	4.7175	5.1429	4.9826	5.0541	4.9284	5.0742	5.1701	4.9205	5.3403	5.3396	5.3082	5.3531	5.2632	5.3842	5.2671	5.2227	5.2187	5.3326	5.1639	5.2313	5.2661	5.1247	5.1249	5.0906	5.1264	pos_41	metab_40	195.113	0.6653	pos	-	-	-	-	-	0.0392506
metab_41	-	-	-	5.6303	5.5253	5.4539	5.3695	5.6005	5.5615	5.5831	5.5169	5.6919	5.692	5.5104	5.7524	5.6803	5.7237	5.6669	5.6368	5.7942	5.6472	5.645	5.6013	5.6561	5.6123	5.6849	5.6515	5.6006	5.6051	5.6014	5.613	pos_42	metab_41	196.097	1.3519	pos	-	-	-	-	-	0.0130841
metab_42	-	-	-	4.701	4.5869	4.7251	4.4894	4.8556	4.8495	4.4786	4.9008	4.906	4.7798	4.9486	4.6882	4.642	4.6074	4.5336	4.6267	4.5609	4.6371	4.7239	4.5392	4.6833	4.6686	4.5619	4.7032	4.6355	4.6376	4.6399	4.6347	pos_43	metab_42	270.109	1.3519	pos	-	-	-	-	-	0.00536705
metab_43	-	-	-	5.3103	5.2851	5.1385	4.941	5.2739	5.1293	5.2069	5.199	5.3208	5.2934	5.2788	5.5197	5.5399	5.5175	5.5075	5.4942	5.5563	5.542	5.5148	5.4482	5.5108	5.4865	5.5238	5.4845	5.3683	5.387	5.3819	5.3884	pos_44	metab_43	348.192	1.3931	pos	-	-	-	-	-	0.0209417
metab_44	-	-	-	4.9753	4.9852	4.9692	4.698	5.0234	4.8548	4.9765	4.8646	4.988	5.1735	4.9815	5.1483	5.2038	5.1604	5.1344	5.154	5.2424	5.1809	5.0935	5.0682	5.1989	5.1009	5.1396	5.1383	5.0617	5.0724	5.0692	5.048	pos_45	metab_44	364.187	1.3931	pos	-	-	-	-	-	0.0249078
metab_45	-	-	-	5.1466	4.675	5.2226	4.4653	4.5723	4.7247	4.397	4.5978	4.5983	4.969	4.646	4.6088	4.7318	4.6831	4.6488	4.6248	4.8259	4.7514	4.6241	4.6947	4.8782	4.8322	4.5864	4.9613	4.7825	4.7623	4.7901	4.7922	pos_46	metab_45	279.17	1.3931	pos	-	-	-	-	-	0.0309521
metab_46	-	-	-	4.7395	4.754	4.7028	4.3988	4.5652	4.5102	4.7669	4.7028	4.7636	4.7619	4.6828	5.058	4.9846	4.9461	4.9904	4.9714	5.0823	4.9964	5.0984	5.0175	4.9258	4.9325	4.9258	4.9954	4.8323	4.8373	4.8322	4.8497	pos_47	metab_46	300.156	1.331	pos	-	-	-	-	-	0.0191562
metab_47	-	-	-	5.5878	5.5089	5.5117	5.4211	5.3568	5.4352	5.3809	5.4747	5.53	5.5137	5.4046	5.137	5.0711	5.1559	5.1179	5.1464	5.1979	5.2815	5.2337	5.1473	5.2001	5.1458	5.1771	5.2358	5.3044	5.3048	5.3044	5.3311	pos_48	metab_47	184.097	1.5367	pos	-	-	-	-	-	0.0310601
metab_48	-	-	-	5.4674	5.3901	5.2837	5.1474	5.4829	5.2163	5.311	5.3879	5.5912	5.5233	5.434	5.6521	5.5289	5.4421	5.5177	5.4764	5.6754	5.5559	5.6887	5.5593	5.5261	5.5232	5.6645	5.5633	5.4767	5.478	5.482	5.4887	pos_49	metab_48	213.124	1.331	pos	-	-	-	-	-	0.012471
metab_49	-	-	-	5.2681	5.1427	5.095	4.8155	5.0263	4.8644	5.0609	4.9838	5.1134	5.1064	5.039	5.3643	5.493	5.3973	5.4112	5.409	5.5355	5.4441	5.403	5.4441	5.6478	5.4809	5.4285	5.4158	5.288	5.2815	5.2943	5.2962	pos_50	metab_49	249.16	1.6	pos	-	-	-	-	-	0.0153157
metab_50	-	-	-	5.3906	5.3352	5.0532	4.4389	5.112	4.1295	4.8392	4.6884	5.4199	4.8051	5.0515	4.5255	5.0247	5.1334	5.1888	5.3307	4.6534	5.4133	5.2294	5.332	5.3302	5.1763	5.1602	5.3394	5.1115	5.1276	5.1022	5.0903	pos_51	metab_50	591.168	3.2369	pos	-	-	-	-	-	0.0363115
metab_51	-	-	-	5.2515	5.089	5.2797	4.8798	5.0516	5.0138	4.9998	4.9601	5.1132	5.1227	5.0591	5.2252	5.2871	5.2321	5.257	5.1937	5.29	5.2481	5.2187	5.1751	5.2276	5.2556	5.2444	5.2464	5.1225	5.1628	5.1624	5.1642	pos_52	metab_51	322.176	1.3101	pos	-	-	-	-	-	0.0457563
metab_52	-	-	-	4.0492	2.9673	3.003	3.5683	4.2612	4.1945	4.3853	3.8176	4.3856	4.1089	4.2614	5.7025	5.7573	5.7916	5.7077	5.5622	5.6498	5.9547	4.57	5.9165	4.5686	3.3516	6.0912	5.9671	5.4568	5.501	5.4951	5.5025	pos_53	metab_52	433.173	3.703	pos	-	-	-	-	-	0.0485443
metab_53	-	-	-	4.9059	3.3976	3.6173	4.301	4.7459	4.7891	4.8948	4.6404	5.0293	4.7427	4.9644	6.3098	6.2525	6.1562	6.0907	5.8955	5.9318	6.4267	5.0173	6.4946	4.9454	4.4311	6.6338	6.5	5.9929	6.004	6.0036	6.0055	pos_54	metab_53	463.184	3.6808	pos	-	-	-	-	-	0.0132408
metab_54	-	-	-	5.1	5.1335	4.93	4.7082	4.9072	4.8118	4.8769	4.8903	4.9596	5.0085	4.9353	4.6637	4.9456	4.8141	4.9829	5.1391	4.89	5.2094	5.1373	5.1317	5.1766	5.1223	5.0943	5.1841	4.9925	4.9849	4.9924	4.9905	pos_55	metab_54	440.237	3.4802	pos	-	-	-	-	-	0.00824094
metab_55	-	-	-	4.4674	4.3179	4.4499	4.3057	4.2535	4.4139	4.4139	4.2052	4.4729	4.5228	4.3312	4.6609	4.4839	4.4966	4.304	4.1766	4.6001	4.1753	4.2855	4.2819	4.3137	4.3724	4.36	4.3633	4.3164	4.2991	4.3073	4.2972	pos_56	metab_55	237.149	4.1029	pos	-	-	-	-	-	0.0203471
metab_56	-	-	-	5.8125	5.7927	5.7487	5.4815	5.8116	5.7628	5.7562	5.7471	5.82	5.8316	5.769	6.2188	6.1862	6.176	6.2261	6.1886	6.1704	6.1372	6.1692	6.1128	6.1452	6.1316	6.222	6.1463	5.9879	5.9854	5.992	5.9939	pos_57	metab_56	192.102	1.6403	pos	-	-	-	-	-	0.00885352
metab_57	-	-	-	2.9406	3.1248	5.1806	2.9645	2.5869	2.5541	2.4386	2.4479	3.8978	2.6864	3.6433	5.0644	2.4624	4.7223	3.0289	1.5535	2.6335	4.1044	5.3782	5.6914	2.7181	5.4608	3.3162	5.8654	4.9331	4.9327	4.9359	4.9342	pos_58	metab_57	391.163	4.3034	pos	-	-	-	-	-	0.00332657
metab_58	-	-	-	3.746	3.8871	4.4075	3.817	3.7215	3.8655	3.8795	3.779	4.6861	3.9231	4.2	4.2352	3.8677	4.4652	3.8839	3.658	3.7928	4.0039	4.9759	5.3496	4.0749	5.5283	4.3164	5.702	4.755	4.7552	4.7355	4.7512	pos_59	metab_58	405.178	4.5039	pos	-	-	-	-	-	0.0212432
metab_59	-	-	-	4.9243	5.0186	4.9732	4.823	4.9066	4.9724	4.8519	4.7602	4.9082	4.9342	4.8271	4.5218	4.5664	4.5205	4.5738	4.4758	4.5181	4.5959	4.5023	4.5514	4.6675	4.6461	4.6162	4.6315	4.7807	4.7548	4.7754	4.7823	pos_60	metab_59	304.191	4.8594	pos	-	-	-	-	-	0.0288186
metab_60	-	-	-	4.4057	4.8293	3.6287	4.1021	4.7606	4.6102	4.5871	4.6402	4.8047	4.7443	4.7528	3.1368	3.6687	3.6411	3.8415	3.7069	3.5679	3.9008	3.6505	3.728	3.6312	3.3016	3.7206	3.7316	4.3925	4.3927	4.4009	4.4289	pos_61	metab_60	404.337	4.4816	pos	-	-	-	-	-	0.0402738
metab_61	-	-	-	4.526	4.3257	4.5134	4.447	4.4913	4.3767	4.365	4.3416	4.3748	4.4811	4.4019	4.4195	4.4754	4.4306	4.4563	4.3915	4.3849	4.4592	4.5548	4.4126	4.3793	4.4121	4.4365	4.4306	4.4192	4.4067	4.4063	4.4089	pos_62	metab_61	226.18	5.1714	pos	-	-	-	-	-	0.0140668
metab_62	-	-	-	4.6299	4.7041	4.293	4.4482	4.6627	4.55	4.6533	4.6415	4.8079	4.4437	4.6545	4.3407	4.5622	4.5267	4.551	4.5392	4.4368	4.5727	4.3143	4.6051	4.7122	4.8363	4.6968	4.567	4.5625	4.5924	4.592	4.5937	pos_63	metab_62	401.337	5.1267	pos	-	-	-	-	-	0.0342709
metab_63	-	-	-	3.6277	3.6348	3.37	3.9247	4.5763	3.8242	3.6617	3.5054	3.487	3.8208	3.5039	4.7638	4.4929	4.4496	5.2658	5	4.23	4.6429	4.5962	4.5922	3.8294	4.0675	4.6437	4.6736	4.3455	4.3941	4.3589	4.3472	pos_64	metab_63	538.282	5.4387	pos	-	-	-	-	-	0.0530642
metab_64	-	-	-	6.4183	6.2722	6.2558	6.3085	6.2936	6.336	6.3829	6.322	6.5267	6.2313	6.476	6.4848	6.529	6.5023	6.4867	6.5176	6.516	6.4928	6.5488	6.4565	6.4452	6.3473	6.5003	6.5027	6.3968	6.4075	6.4008	6.3986	pos_65	metab_64	409.162	5.7036	pos	-	-	-	-	-	0.0107463
metab_65	-	-	-	5.4869	5.679	5.0173	5.4002	5.209	5.0177	5.0861	5.26	5.4779	5.2933	5.2925	3.7671	4.2777	4.5502	4.1751	3.669	3.9486	5.0025	4.5172	5.1522	5.3468	5.2275	4.9635	5.0019	5.1295	5.1324	5.1321	5.1297	pos_66	metab_65	431.21	5.7693	pos	-	-	-	-	-	0.003519
metab_66	-	-	-	5.2166	4.1016	5.1884	4.3416	4.8943	5.0072	4.1157	4.6954	5.0673	4.537	5.1853	3.7889	4.2887	4.2311	4.132	4.1734	3.9379	4.0059	3.719	3.9621	5.209	5.2022	4.2136	3.8856	4.7458	4.74	4.7459	4.7186	pos_67	metab_66	409.346	6.1037	pos	-	-	-	-	-	0.029432
metab_67	-	-	-	4.3494	3.7883	4.0847	4.4978	4.9506	4.5758	4.2621	4.1542	4.4033	4.1311	3.972	5.9417	5.9663	5.9092	6.0022	6.1272	5.9203	5.6691	5.0831	5.719	5.1327	5.084	5.8883	5.7267	5.5054	5.5057	5.5001	5.4884	pos_68	metab_67	464.283	6.193	pos	-	-	-	-	-	0.0185816
metab_68	-	-	-	4.7231	3.6644	4.6344	4.7861	4.9571	4.4944	4.6374	4.4169	4.731	4.8592	4.2872	4.5265	4.5759	4.9956	4.9499	4.6748	4.7506	4.8641	4.8395	4.8072	4.9148	4.7417	4.8204	4.788	4.7202	4.7303	4.7155	4.7173	pos_69	metab_68	245.154	6.5468	pos	-	-	-	-	-	0.0152415
3-ketosphinganine	C02934	LMSP01020002	C18H37NO2	6.822	7.3065	6.5056	6.5912	6.7059	6.1773	6.3674	6.8452	6.6497	6.4054	7.0657	5.4135	5.0774	5.0835	5.2498	5.1442	5.3037	6.0204	5.8318	5.5441	5.8115	6.1158	5.7056	5.6578	6.5785	6.5788	6.5831	6.5926	pos_70	metab_69	282.279	7.0144	pos	M+H-H2O, M+Na, M+H, M+H-2H2O	54.4	-	-0.418063	-	0.0152189
metab_70	-	-	-	4.4275	5.0926	5.0294	5.7518	5.208	6.2601	5.7645	5.6747	4.7705	4.4537	4.9338	4.4223	4.5164	4.4538	4.4237	4.4224	4.4275	4.4727	4.3964	4.4041	4.4453	4.4529	4.4401	4.4206	5.5951	5.5728	5.5602	5.5615	pos_71	metab_70	503.373	10.3398	pos	-	-	-	-	-	0.0376773
metab_71	-	-	-	3.5231	5.3321	5.3901	5.4717	5.4353	6.1558	5.5062	6.1877	4.612	3.9588	4.6753	3.4662	3.5529	3.3815	3.4115	3.4135	3.4273	3.3492	3.2616	3.335	3.381	3.431	3.3401	3.3961	5.5291	5.5297	5.5122	5.5141	pos_72	metab_71	517.389	10.5415	pos	-	-	-	-	-	0.0217361
metab_72	-	-	-	6.1068	6.4432	5.7763	5.9969	5.5811	5.3479	5.3624	5.9211	5.4327	5.3461	6.304	4.8091	4.2572	4.5402	5.2142	5.1763	4.7128	5.5096	5.1557	5.0802	4.9862	4.9863	4.4949	5.1721	5.6544	5.6678	5.6471	5.6486	pos_73	metab_72	586.517	11.3247	pos	-	-	-	-	-	0.0218325
metab_73	-	-	-	5.1481	4.9889	4.8997	5.0275	5.1282	4.9746	4.979	4.8554	5.0586	5.1027	4.9835	5.0861	5.1721	5.1638	5.1379	5.0619	5.0732	5.0742	5.0033	5.0201	5.1468	5.1402	5.069	4.9766	5.0621	5.0231	5.0227	5.0249	pos_74	metab_73	165.087	13.9917	pos	-	-	-	-	-	0.0453759
metab_74	-	-	-	4.6934	4.6142	4.6279	4.6551	4.662	4.6099	4.6192	4.5531	4.7244	4.6716	4.6972	4.7646	4.7442	4.7704	4.75	4.6919	4.7163	4.7347	4.7128	4.7276	4.7057	4.7285	4.7293	4.7168	4.6776	4.6793	4.6792	4.6857	pos_75	metab_74	129.995	14.0655	pos	-	-	-	-	-	0.00825531
metab_75	-	-	-	5.3895	5.3063	5.352	5.3171	5.402	5.3654	5.4031	5.3627	5.4576	5.4499	5.4085	5.5748	5.4639	5.518	5.4715	5.4237	5.4987	5.5429	5.5131	5.4635	5.4151	5.5005	5.4444	5.4402	5.3918	5.3961	5.4072	5.4091	pos_76	metab_75	117.022	14.0115	pos	-	-	-	-	-	0.0193822
metab_76	-	-	-	6.0365	5.9442	5.9716	6.0237	6.0559	5.9482	5.869	6.1122	6.0347	6.2098	6.1957	6.0522	6.152	6.1231	6.0891	6.0293	6.0781	6.0428	5.9487	6.0213	6.0856	6.0728	6.0682	6.0593	6.0342	6.0325	6.0361	6.0182	pos_77	metab_76	685.436	11.1908	pos	-	-	-	-	-	0.0185665
metab_77	-	-	-	3.8062	5.9605	6.0523	5.6963	5.2728	5.9844	5.7647	6.1236	4.058	4.1102	4.7371	3.4061	3.5823	3.4264	3.3925	3.3553	3.4225	3.3867	3.242	3.486	3.3246	3.7095	3.3248	3.4172	5.491	5.4776	5.483	5.4789	pos_78	metab_77	471.342	10.3398	pos	-	-	-	-	-	0.0138891
metab_78	-	-	-	6.1514	6.4847	5.9109	5.1116	4.4094	4.4621	3.8381	5.969	5.1392	4.9007	6.3046	2.5508	3.5143	2.6335	3.2644	2.5457	2.5599	4.0523	3.6067	4.0038	4.0083	4.5522	2.774	4.2738	5.6335	5.6394	5.6392	5.6104	pos_79	metab_78	604.528	10.2502	pos	-	-	-	-	-	0.0312427
metab_79	-	-	-	4.8373	4.3049	5.5078	4.5883	5.4478	4.7171	5.0894	4.8572	4.8214	5.2276	4.9556	6.0514	5.0546	6.0795	5.7157	5.6797	5.2391	4.973	4.5342	5.5052	4.8957	4.9232	5.473	5.4391	5.3705	5.3692	5.3514	5.3522	pos_80	metab_79	695.398	6.9924	pos	-	-	-	-	-	0.0240597
metab_80	-	-	-	5.2193	4.5339	5.4787	4.5977	5.7944	5.718	5.3047	5.0676	5.1373	5.5001	4.6895	5.4808	5.4684	5.6914	5.2953	5.0827	5.3371	5.1726	4.9315	5.2409	5.1229	4.697	5.2174	5.14	5.2772	5.2759	5.2696	5.2749	pos_81	metab_80	357.279	7.3701	pos	-	-	-	-	-	0.00765363
metab_81	-	-	-	4.4048	7.055	7.1981	7.2325	6.412	6.9362	7.0265	7.4319	5.8392	5.0797	6.3826	3.6756	4.3445	3.6006	3.3109	3.168	3.2481	3.0771	3.2891	3.1294	2.6414	4.5817	3.4572	3.233	6.8794	6.8795	6.8733	6.8656	pos_82	metab_81	447.344	9.9832	pos	-	-	-	-	-	0.015012
metab_82	-	-	-	3.3184	4.2486	4.6052	6.6097	4.2292	6.0408	6.2554	4.5989	4.0862	3.3298	3.3525	1.336	2.8425	1.5245	1.9247	1.9335	1.3447	2.4164	2.0018	2.6583	2.2414	3.0749	1.6194	1.6047	5.7024	5.7026	5.6992	5.6979	pos_83	metab_82	553.35	9.8727	pos	-	-	-	-	-	0.00533017
metab_83	-	-	-	3.7681	3.8625	4.635	6.884	4.5654	6.2086	6.5811	5.1646	4.5682	3.5738	3.705	3.531	3.6152	3.3695	3.4771	3.106	3.4316	3.6125	3.4323	3.5857	3.5347	3.6633	3.4682	3.4287	6.0025	5.9994	5.9871	5.9889	pos_84	metab_83	527.335	9.828	pos	-	-	-	-	-	0.0174563
metab_84	-	-	-	2.3311	3.6839	4.7788	6.3838	4.1218	5.8437	5.9909	4.5519	4.2474	0.3335	3.6294	0.3382	0.3375	0.3407	0.3435	0.3354	0.4722	1.8699	0.3184	0.3344	0.3475	2.4424	1.9829	0.3433	5.6332	5.6361	5.6231	5.625	pos_85	metab_84	461.326	9.7842	pos	-	-	-	-	-	0.0144556
metab_85	-	-	-	3.2004	6.0978	6.167	6.4178	5.5694	6.2866	6.4911	6.6973	4.8772	3.6101	5.0316	2.3855	1.5314	2.6992	2.5743	2.7147	2.9475	2.8419	2.6908	2.5836	2.5559	2.8681	2.5501	2.872	6.0148	5.9969	5.9897	5.9916	pos_86	metab_85	433.329	9.7842	pos	-	-	-	-	-	0.0266467
metab_86	-	-	-	3.2658	6.0814	6.109	6.0992	5.3258	6.1381	5.8783	6.108	4.395	3.036	5.1676	0.2897	0.2891	0.292	0.2945	0.2872	0.2942	0.2862	0.2719	0.2863	0.2981	0.2845	0.2977	0.2943	5.6772	5.6628	5.6625	5.6649	pos_87	metab_86	367.321	9.7405	pos	-	-	-	-	-	0.016126
LPC(18:1)	C04230	-	C26H52NO7P	4.9038	5.0796	4.3745	5.1177	4.8361	4.42	5.3005	4.3604	4.2148	3.9604	4.1014	5.3478	5.4496	5.2947	5.4978	6.0408	4.8606	6.5204	6.1686	6.8851	6.2679	4.9359	6.2424	6.5112	5.9277	5.9195	5.9137	5.91	pos_88	metab_87	522.356	8.4135	pos	M+H, M+Na, M+K, M+H-H2O	72.8	-	0.346625	-	0.0178161
metab_88	-	-	-	2.9676	0.9284	4.3075	6.1668	4.3454	4.9471	5.2009	4.0139	2.9358	3.8562	3.2633	1.0026	1.0014	1.0068	1.0114	0.998	1.0109	0.9961	0.9691	2.6478	3.9983	0.9929	1.0172	1.011	4.8877	4.8819	4.9099	4.8833	pos_89	metab_88	487.303	9.5858	pos	-	-	-	-	-	0.0304146
metab_89	-	-	-	3.2896	6.2851	6.5339	6.3931	5.8917	6.501	6.4957	6.367	5.3666	3.4102	5.6066	0.5904	0.5894	0.5938	0.5976	0.5865	0.5972	0.585	0.5629	1.4277	1.1325	3.3269	0.6024	3.4361	6.2118	6.2164	6.2226	6.2209	pos_90	metab_89	415.279	9.5219	pos	-	-	-	-	-	0.0111569
metab_90	-	-	-	5.7505	5.7315	5.717	5.7371	5.7733	5.6871	5.729	5.6898	5.8246	5.7988	5.7716	5.8014	5.7979	5.8073	5.7995	5.7898	5.7734	5.758	5.8451	5.7428	5.739	5.8132	5.7941	5.772	5.7619	5.7606	5.7618	5.7592	pos_91	metab_90	165.164	9.0708	pos	-	-	-	-	-	0.00292685
metab_91	-	-	-	3.2735	6.3398	5.8439	6.0774	5.2533	5.9644	6.1059	6.3772	4.7343	2.1536	4.6662	2.1598	2.1266	2.1326	2.1376	2.1228	2.137	2.7815	2.0908	2.8265	2.1448	2.4366	2.144	2.1372	5.664	5.6613	5.6609	5.6642	pos_92	metab_91	405.298	9.3217	pos	-	-	-	-	-	0.00397879
3-Methyl-2-cyclopenten-1-one	-	HMDB0031546	C6H8O	6.19	6.1752	6.1512	6.1758	6.2255	6.1283	6.1806	6.1159	6.2827	6.2451	6.2273	6.2655	6.2505	6.2548	6.2458	6.2365	6.2182	6.2259	6.3047	6.2078	6.2001	6.2618	6.248	6.2288	6.207	6.2054	6.2068	6.2069	pos_93	metab_92	114.092	9.0708	pos	M+H, M+NH4, M+CH3OH+H, M+H-H2O	59.4	-	4.26836	2758-18-1	0.00177825
PE(18:1(9Z)/0:0)	-	LMGP02050004	C23H46NO7P	5.0756	4.9825	4.8287	4.6424	4.6771	4.6104	5.1379	4.8807	4.8017	4.816	4.2472	5.3657	5.3646	5.2128	5.3781	5.7533	5.1979	5.9037	5.6513	6.1284	5.5956	5.1814	5.6019	5.7325	5.373	5.3724	5.3712	5.3577	pos_94	metab_93	502.291	8.5248	pos	M+H, M+Na, M+2Na-H, M+H-H2O	96.9	-	0.331872	-	0.0167021
PE(19:1(9Z)/0:0)	-	LMGP02050019	C24H48NO7P	5.0247	4.8346	4.2999	4.2272	3.8544	3.8281	3.2264	4.2417	3.6906	4.1334	3.8585	4.965	4.6309	4.7591	4.563	5.0299	4.8046	5.2547	5.2168	4.7899	4.7351	4.4275	4.6307	4.738	4.6304	4.6347	4.6313	4.6076	pos_95	metab_94	516.306	8.9068	pos	M+Na, M+2Na-H, M+H, M+H-H2O	87.3	-	0.512887	-	0.028145
metab_95	-	-	-	5.25	5.1368	5.1998	4.8753	4.6848	4.5458	5.4641	5.0366	5.155	4.9122	4.5265	5.3577	5.1361	5.079	5.1488	5.4749	5.1134	5.8906	5.6011	6.0144	5.7217	5.1914	5.5048	5.6172	5.3529	5.3533	5.345	5.3333	pos_96	metab_95	464.314	8.7962	pos	-	-	-	-	-	0.0214677
PE(16:0/0:0)	-	LMGP02050002	C21H44NO7P	5.5519	5.8738	5.3113	5.1736	5.1367	5.021	5.2531	5.3813	4.9476	5.1524	4.9349	5.7576	5.7823	5.7287	5.7424	5.9593	5.7001	6.1106	6.0337	6.0206	5.7947	5.4808	5.7716	5.7805	5.6587	5.6555	5.6534	5.6524	pos_97	metab_96	476.275	8.3914	pos	M+Na, M+2Na-H, M+H, M+H-H2O	97.7	-	0.338055	-	0.00640009
metab_97	-	-	-	6.8829	4.8466	5.6568	6.6906	4.8976	6.5355	6.3546	6.722	4.7667	5.9164	4.3737	4.295	4.4924	5.0259	4.8458	4.935	4.6187	4.6659	3.2562	4.7176	4.8729	4.4074	4.7484	4.3752	6.2615	6.2619	6.2453	6.2551	pos_98	metab_97	599.392	6.9256	pos	-	-	-	-	-	0.0177319
PE(17:1(9Z)/0:0)	-	LMGP02050008	C22H44NO7P	4.9012	4.7405	4.1663	4.3486	3.721	3.7015	3.67	4.2375	3.8062	3.9383	2.5722	4.9304	4.7063	4.6857	4.7021	5.1343	4.7497	5.2369	5.2523	4.752	4.7368	4.1653	4.6817	4.7902	4.6294	4.6477	4.6466	4.6491	pos_99	metab_98	488.275	8.2368	pos	M+Na, M+2Na-H, M+H, M+H-H2O	92.1	-	0.332099	-	0.0210811
metab_99	-	-	-	6.6579	4.8455	6.526	5.4555	6.5562	6.346	5.5405	5.9592	6.7296	6.2043	6.7807	4.8768	5.1807	4.6215	4.4598	4.4367	4.1402	4.435	4.1689	5.2679	6.6767	6.6815	5.9933	4.9678	6.3191	6.315	6.3127	6.3123	pos_100	metab_99	423.362	8.1039	pos	-	-	-	-	-	0.00722848
metab_100	-	-	-	6.7233	6.6602	6.6589	6.6648	6.6397	6.5956	6.6789	6.63	6.808	6.6888	6.7282	6.7159	6.7696	6.762	6.8258	6.7937	6.8087	6.8098	6.9002	6.7637	6.7751	6.8332	6.7591	6.7313	6.6649	6.6622	6.6628	6.6633	pos_101	metab_100	437.193	6.3039	pos	-	-	-	-	-	0.00265896
metab_101	-	-	-	5.1246	4.7169	5.2646	5.0271	5.0609	4.711	5.0703	4.7974	5.0615	5.3075	4.8131	5.8076	4.716	5.3012	5.4221	5.5865	4.7633	5.3333	4.9609	5.4032	5.3049	5.2499	5.0907	5.4244	5.1957	5.1957	5.1957	5.1355	pos_102	metab_101	665.387	6.1704	pos	-	-	-	-	-	0.0669372
metab_102	-	-	-	5.1226	4.2991	2.7924	2.695	3.8206	4.7057	5.1054	3.7646	4.6199	5.1195	4.5109	5.9132	4.7785	5.2207	4.4115	5.3908	5.8017	5.1973	5.5868	5.907	5.4937	5.5578	5.5569	5.6257	5.366	5.344	5.3313	5.3332	pos_103	metab_102	512.273	5.3941	pos	-	-	-	-	-	0.0371079
metab_103	-	-	-	3.9061	4.5811	2.23	4.237	4.477	4.3821	4.4113	4.1293	4.6371	4.5908	4.4514	2.3173	2.3159	2.3219	2.327	2.3121	2.3264	2.31	2.2801	2.3102	3.1256	2.581	2.3571	2.3265	4.0384	4.0278	4.0363	4.0401	pos_104	metab_103	390.358	5.3941	pos	-	-	-	-	-	0.0125005
metab_104	-	-	-	4.2948	3.776	4.0997	4.7664	4.8172	4.8854	4.7037	4.8954	4.981	4.9662	4.4905	3.6986	4.0974	4.1057	4.2896	3.5083	3.7942	4.2319	4.3464	4.3468	4.5344	4.6835	4.7203	4.4526	4.5236	4.54	4.5346	4.5414	pos_105	metab_104	259.133	4.7261	pos	-	-	-	-	-	0.0184648
metab_105	-	-	-	4.4544	5.0989	3.9331	5.1937	5.174	4.8122	4.7484	4.8666	5.3898	5.5705	4.9857	3.2612	3.3444	3.3723	3.5497	3.4883	3.3725	4.8333	4.8164	4.7387	4.9402	4.8475	4.5059	4.8528	4.8691	4.88	4.8796	4.8778	pos_106	metab_105	406.353	4.2811	pos	-	-	-	-	-	0.0116862
metab_106	-	-	-	4.9626	4.9394	4.8287	4.54	4.8485	4.6996	4.8579	4.7137	4.925	4.9493	4.8394	5.1946	5.2615	5.2235	5.1873	5.1745	5.277	5.2135	5.1611	5.1	5.2264	5.1546	5.2264	5.2122	5.0143	5.0383	5.0379	5.0337	pos_107	metab_106	179.118	1.331	pos	-	-	-	-	-	0.0258147
metab_107	-	-	-	5.2705	5.234	5.1402	4.9836	5.1458	5.0817	5.1908	5.1159	5.2806	5.2621	5.173	5.5494	5.472	5.4714	5.4645	5.4396	5.5175	5.4784	5.4974	5.4927	5.4922	5.4615	5.4973	5.5343	5.3227	5.3407	5.3402	5.3374	pos_108	metab_107	221.092	1.3101	pos	-	-	-	-	-	0.0193414
metab_108	-	-	-	5.1598	5.0452	5.1231	4.9466	5.2248	5.3794	5.3014	5.0946	5.3259	5.1741	5.0888	5.2604	5.219	5.1785	5.208	5.1218	5.2281	5.154	5.209	5.1908	5.2466	5.0745	5.2228	5.2147	5.1369	5.1466	5.1425	5.1481	pos_109	metab_108	203.139	0.6653	pos	-	-	-	-	-	0.0115333
metab_109	-	-	-	5.3456	5.3302	5.2461	5.1653	5.3134	5.4242	5.2167	5.363	5.5742	5.39	5.2098	5.4355	5.3451	5.3766	5.3696	5.2976	5.3888	5.2584	5.3714	5.3377	5.2879	5.2018	5.2993	5.3457	5.3048	5.3024	5.3021	5.3073	pos_110	metab_109	170.081	0.6653	pos	-	-	-	-	-	0.00559039
metab_110	-	-	-	6.3587	6.5245	6.5259	5.925	5.9642	5.8757	5.8692	6.1988	5.9509	6.6225	6.3759	5.5887	5.6109	5.5826	5.5924	5.5762	5.6495	5.6431	6.3548	5.5521	5.6857	6.4164	5.5743	5.9642	6.1826	6.1829	6.1898	6.2002	pos_111	metab_110	160.133	0.6653	pos	-	-	-	-	-	0.0190649
metab_111	-	-	-	5.0919	5.2821	5.3288	4.6829	5.0642	5.0155	4.9534	5.1258	4.735	5.2285	5.0516	4.8143	4.9336	4.8395	4.8859	4.922	4.8385	5.0625	4.9511	4.9801	5.0475	5.0538	4.958	4.9302	5.0265	5.0237	4.9999	5.0302	pos_112	metab_111	364.223	1.8672	pos	-	-	-	-	-	0.0311079
metab_112	-	-	-	5.0757	4.9842	4.9581	4.5732	4.9741	4.9066	4.9512	4.9543	5.0093	4.9112	4.9587	5.1563	5.1896	5.1457	5.1569	5.085	5.2013	5.0848	5.0788	5.1411	5.235	5.0465	5.092	5.1365	5.0186	5.0239	5.0035	5.0253	pos_113	metab_112	149.107	0.6653	pos	-	-	-	-	-	0.02277
metab_113	-	-	-	5.2625	4.6455	5.0276	5.3908	5.2456	5.2272	5.1954	4.8921	5.4068	5.3727	5.2736	5.4858	5.3745	5.3511	5.3363	5.1622	5.3698	5.0894	4.9958	5.0783	5.1468	5.359	5.3017	5.2523	5.2257	5.226	5.2526	5.2346	pos_114	metab_113	186.01	0.5105	pos	-	-	-	-	-	0.0293968
metab_114	-	-	-	4.4541	4.5003	4.3127	4.1788	4.608	4.4679	4.3685	4.4881	4.6676	4.5131	4.4208	5.0475	5.0735	5.0673	4.9674	4.9881	4.9223	5.0271	5.0744	5.0063	5.0965	4.9893	4.8821	5.0771	4.6825	4.7282	4.6819	4.6841	pos_115	metab_114	296.197	0.6653	pos	-	-	-	-	-	0.0535813
metab_115	-	-	-	5.4837	5.3476	5.3648	5.1587	5.392	5.3522	5.3214	5.3152	5.4293	5.4715	5.3592	5.8434	5.9073	5.7816	5.8486	5.8016	5.8878	5.8618	5.8527	5.7754	5.8098	5.7635	5.8508	5.7679	5.6525	5.6638	5.6634	5.6652	pos_116	metab_115	287.124	0.6653	pos	-	-	-	-	-	0.0133962
metab_116	-	-	-	6.6434	5.9934	6.3704	6.7251	6.625	6.6066	6.5278	6.3019	6.7465	6.7153	6.6638	6.8322	6.7252	6.6651	6.7137	6.5271	6.7355	6.4536	6.3424	6.409	6.4764	6.6966	6.6588	6.5922	6.5895	6.5898	6.6014	6.5912	pos_117	metab_116	242	0.4927	pos	-	-	-	-	-	0.0131832
metab_117	-	-	-	5.3807	5.3451	5.2067	4.9838	5.3828	5.2384	5.3536	5.3278	5.4878	5.4143	5.3435	5.5895	5.6033	5.519	5.5687	5.5817	5.5839	5.566	5.6188	5.5689	5.6232	5.6011	5.6188	5.5795	5.4361	5.4617	5.4607	5.4625	pos_118	metab_117	156.077	0.9149	pos	-	-	-	-	-	0.0290602
metab_118	-	-	-	4.692	4.7165	4.4219	4.9716	4.7309	4.705	5.0585	4.5516	4.8289	5.0522	4.6418	4.8716	4.9457	4.8324	4.8858	4.9514	4.6807	4.8583	4.9434	4.9666	4.7221	4.7259	4.721	4.7952	4.7067	4.6886	4.7109	4.7127	pos_119	metab_118	222.076	0.9149	pos	-	-	-	-	-	0.0251795
metab_119	-	-	-	5.3793	5.3178	5.3038	5.4078	5.429	5.2203	5.1601	5.2704	5.2868	5.3394	5.2921	5.0358	4.564	4.7347	4.9935	5.359	4.6123	4.6753	4.6411	4.6842	4.7865	4.8002	4.6686	4.8239	5.0906	5.0852	5.0905	5.0832	pos_120	metab_119	423.213	2.2398	pos	-	-	-	-	-	0.00870419
metab_120	-	-	-	4.7037	4.6188	4.7843	4.2827	4.6064	4.5129	4.6542	4.4726	4.6618	4.6521	4.4942	4.7728	4.7509	4.7866	4.7642	4.7214	4.7474	4.72	4.7659	4.6897	4.7709	4.7287	4.8193	4.7573	4.6624	4.6714	4.676	4.6778	pos_121	metab_120	231.113	2.2842	pos	-	-	-	-	-	0.0157999
metab_121	-	-	-	5.5095	5.3702	5.2977	5.2035	5.4856	5.3258	5.3198	5.422	5.5291	5.5725	5.4981	5.6159	5.6216	5.5408	5.5651	5.5542	5.6438	5.5951	5.5902	5.5152	5.5702	5.5495	5.602	5.5385	5.4547	5.455	5.4652	5.4648	pos_122	metab_121	213.123	0.9149	pos	-	-	-	-	-	0.013525
metab_122	-	-	-	4.859	4.8858	4.7803	4.5427	4.8626	4.7762	4.7811	4.7874	5.0417	4.9368	4.7947	5.2948	5.3353	5.2321	5.2381	5.2316	5.2414	5.2383	5.2118	5.1592	5.2023	5.2266	5.2265	5.1793	5.028	5.028	5.0408	5.0575	pos_123	metab_122	209.092	0.9149	pos	-	-	-	-	-	0.032475
Cynaratriol	-	HMDB0034983	C15H22O5	5.4989	5.4909	5.3758	5.2024	5.5261	5.4179	5.3599	5.352	5.4456	5.6195	5.4509	5.0874	5.0747	5.053	5.0659	5.0853	5.1307	5.0801	4.9002	4.915	4.3339	4.2514	4.9816	5.0369	5.2207	5.2379	5.2336	5.2393	pos_124	metab_123	265.144	2.4609	pos	M+H-H2O, 2M+K, M+Na, M+H-2H2O	-	74.9	0.436584	70894-20-1	0.019378
metab_124	-	-	-	4.8257	4.796	4.7062	4.5152	4.9053	4.9086	4.7423	4.7706	4.9182	5.0121	4.7625	4.5242	4.5502	4.5871	4.5652	4.5221	4.5773	4.551	4.478	4.4432	4.3433	4.2948	4.6004	4.5494	4.6659	4.6727	4.6767	4.6785	pos_125	metab_124	147.081	2.4609	pos	-	-	-	-	-	0.0128075
metab_125	-	-	-	5.3923	5.2805	5.7269	5.5644	5.8278	4.4127	4.833	6.0188	5.6859	5.5483	5.7113	5.7092	5.5673	5.6768	5.6473	5.5827	5.8423	5.2367	5.4789	5.5662	5.3674	5.3641	5.6553	5.358	5.5525	5.5494	5.5461	5.5375	pos_126	metab_125	565.156	2.4387	pos	-	-	-	-	-	0.0148076
metab_126	-	-	-	5.2392	5.176	5.0633	5.0376	5.2722	5.2104	5.2515	5.1599	5.356	5.3572	5.2464	5.4449	5.4191	5.3642	5.3928	5.3694	5.404	5.355	5.3555	5.3616	5.3593	5.3593	5.3957	5.3315	5.2607	5.2579	5.2774	5.2699	pos_127	metab_126	152.071	0.9149	pos	-	-	-	-	-	0.0206227
metab_127	-	-	-	5.5852	5.4587	5.392	5.2911	5.4822	5.4706	5.5273	5.408	5.6069	5.5658	5.4149	5.8149	5.8014	5.7795	5.7887	5.7712	5.8166	5.7932	5.7887	5.762	5.8186	5.7856	5.8218	5.7883	5.6521	5.6524	5.6583	5.6601	pos_128	metab_127	142.086	0.9149	pos	-	-	-	-	-	0.0093707
N-(1-Deoxy-1-fructosyl)methionine	-	HMDB0037841	C11H21NO7S	5.198	5.123	5.0174	4.3339	4.9305	4.8839	4.7594	4.8559	5.1276	4.9105	4.9229	5.5528	5.4974	5.5051	5.5572	5.4609	5.7099	5.521	5.4106	5.5412	5.4643	5.2792	5.4512	5.4609	5.3554	5.3519	5.3532	5.3561	pos_129	metab_128	276.09	0.7022	pos	M+H-2H2O, M+NH4, M+H, M+H-H2O	-	74.7	0.321481	20638-92-0	0.00445635
metab_129	-	-	-	4.5497	4.6328	4.6461	4.3825	4.2775	4.554	4.6219	4.2367	4.6577	4.6255	4.4428	4.9762	4.8215	4.9441	4.7843	4.8448	4.9649	4.8904	4.882	4.9049	4.9701	4.8885	4.9122	4.8999	4.6834	4.6625	4.6501	4.6569	pos_130	metab_129	270.108	0.6653	pos	-	-	-	-	-	0.0334175
metab_130	-	-	-	4.9748	4.8727	4.8698	4.9126	4.944	4.8926	4.8442	4.9774	4.9768	5.0516	5.0141	5.0027	5.0325	5.0313	5.0431	4.9851	5.0224	5.0286	4.9245	4.9404	4.9804	4.999	4.9752	4.9641	4.9268	4.9167	4.9229	4.9107	pos_131	metab_130	138.995	0.0124	pos	-	-	-	-	-	0.0162548
metab_131	-	-	-	4.27	4.2086	4.1843	4.2346	4.2747	4.2076	4.2041	4.1304	4.3133	4.2862	4.2271	4.4087	4.347	4.4164	4.317	4.3298	4.3921	4.3632	4.2751	4.3236	4.3574	4.3739	4.3662	4.3299	4.2829	4.2833	4.2911	4.2929	pos_132	metab_131	285.893	0.0124	pos	-	-	-	-	-	0.0119156
metab_132	-	-	-	5.0011	4.34	4.7268	4.9904	4.9306	4.9427	4.9432	4.5219	5.1448	4.9541	4.9834	5.2566	5.0962	4.9767	5.0909	4.9018	5.0417	4.9109	4.7968	4.7463	4.8361	5.108	5.0552	5.0369	4.9959	4.9964	5.0042	5.0059	pos_133	metab_132	284.047	0.4927	pos	-	-	-	-	-	0.0118874
metab_133	-	-	-	6.4511	5.8563	6.1665	6.4791	6.3846	6.4096	6.3568	6.022	6.5625	6.4209	6.4362	6.6971	6.5361	6.4778	6.5352	6.4	6.5518	6.3207	6.2642	6.2545	6.3382	6.5279	6.5119	6.4342	6.4208	6.424	6.4301	6.4412	pos_134	metab_133	223.989	0.4927	pos	-	-	-	-	-	0.0208368
metab_134	-	-	-	6.3513	6.2635	6.2491	6.2813	6.317	6.2629	6.2642	6.2735	6.3808	6.3793	6.3665	6.405	6.4062	6.423	6.4131	6.3642	6.4058	6.4079	6.3518	6.3659	6.3555	6.3931	6.3747	6.3712	6.3134	6.3147	6.3144	6.3121	pos_135	metab_134	113.964	0.0175	pos	-	-	-	-	-	0.00267343
metab_135	-	-	-	6.3567	5.9291	6.1438	6.3768	6.3214	6.2998	6.2152	6.1647	6.3918	6.4377	6.3875	6.4717	6.4189	6.3937	6.401	6.3077	6.4107	6.2348	6.1237	6.1978	6.2552	6.3891	6.3446	6.318	6.2994	6.2997	6.2939	6.2816	pos_136	metab_135	82.0144	0.4927	pos	-	-	-	-	-	0.0193138
metab_136	-	-	-	4.565	4.4962	4.4897	4.5433	4.4957	4.4536	4.4613	4.5615	4.5404	4.615	4.5609	4.6019	4.6343	4.6546	4.6244	4.6135	4.6102	4.6224	4.5045	4.5668	4.565	4.5773	4.5733	4.6038	4.5146	4.5472	4.5144	4.5161	pos_137	metab_136	118.968	0.0175	pos	-	-	-	-	-	0.037791
metab_137	-	-	-	4.9627	4.8828	4.8637	4.9189	4.9149	4.8733	4.8741	4.9788	4.9691	5.0315	5.002	5.0164	5.013	5.0337	5.0209	4.986	5.0052	5.0101	4.94	4.9765	4.9726	4.9961	4.9882	4.9841	4.9287	4.9415	4.924	4.9259	pos_138	metab_137	116.972	0.0175	pos	-	-	-	-	-	0.0183456
metab_138	-	-	-	5.1885	4.1935	5.0586	5.2657	5.0463	5.2381	4.8435	5.036	5.1264	5.446	5.3025	5.249	5.2183	5.1687	5.2082	5.0584	5.017	4.659	4.678	4.8528	4.9342	5.1682	4.9575	5.0075	4.9825	4.9838	4.9514	4.9451	pos_139	metab_138	604.864	0.4927	pos	-	-	-	-	-	0.0467767
metab_139	-	-	-	5.4529	5.411	5.3521	5.1116	5.3922	5.3486	5.3303	5.5189	5.2298	5.3304	5.4764	5.6504	5.585	5.7775	5.6421	5.6265	5.6282	5.6889	5.6878	5.5667	5.5965	5.451	5.6025	5.4022	5.4722	5.4724	5.4721	5.4601	pos_140	metab_139	84.9603	0.5105	pos	-	-	-	-	-	0.0138669
metab_140	-	-	-	4.6958	4.4713	4.5457	4.1518	4.6767	4.5718	4.5138	4.7092	4.2767	4.4503	4.7392	4.9583	4.8466	5.0339	4.9268	4.8473	4.8784	4.8788	4.8996	4.7495	4.8242	4.6741	4.8739	4.4905	4.6998	4.723	4.7145	4.7103	pos_141	metab_140	188.956	0.5105	pos	-	-	-	-	-	0.0221324
metab_141	-	-	-	4.8212	4.4729	4.6863	4.5837	4.8162	4.7768	4.6701	4.7786	4.3689	4.8022	4.7386	4.977	4.9835	5.0261	4.9356	4.8825	4.9423	4.9388	4.8981	4.834	4.8443	4.7568	4.9208	4.689	4.7726	4.7304	4.7727	4.7669	pos_142	metab_141	256.93	0.5105	pos	-	-	-	-	-	0.0457735
metab_142	-	-	-	5.6373	5.4106	5.4738	5.194	5.5985	5.5545	5.4838	5.668	5.3468	5.4814	5.6657	5.8639	5.778	5.9501	5.828	5.7523	5.8125	5.8115	5.7721	5.6614	5.7115	5.6015	5.7658	5.5216	5.6558	5.6549	5.6556	5.6408	pos_143	metab_142	216.951	0.5105	pos	-	-	-	-	-	0.0167266
metab_143	-	-	-	4.9524	4.8822	4.9004	4.6268	4.9447	4.7617	4.9985	4.7994	4.9671	4.9931	4.7967	4.6507	4.4796	4.3684	4.5846	4.7971	4.6666	4.7439	4.572	4.7047	4.6984	4.9042	4.8572	4.9354	4.843	4.8432	4.8429	4.8589	pos_144	metab_143	301.073	0.5295	pos	-	-	-	-	-	0.0183695
metab_144	-	-	-	5.3477	5.517	5.5225	5.0989	5.052	5.0962	4.8922	5.2899	5.1147	5.4719	5.1787	4.9527	4.9355	4.7869	4.9819	5.2377	5.0625	5.1857	5.1621	5.0328	4.7438	4.9329	5.0388	4.9151	5.1694	5.181	5.1761	5.1979	pos_145	metab_144	171.149	0.5488	pos	-	-	-	-	-	0.0282408
metab_145	-	-	-	4.3822	4.815	4.4461	3.535	4.0168	3.9441	3.6288	4.4214	4.6243	4.4026	3.9544	4.2309	4.5908	4.4073	4.4514	4.6542	4.506	4.7185	4.8382	4.8575	4.7119	4.6653	4.69	4.6407	4.4263	4.419	4.4461	4.4204	pos_146	metab_145	209.009	0.5488	pos	-	-	-	-	-	0.0291246
metab_146	-	-	-	4.5579	4.4481	4.3279	3.7582	4.4524	4.206	3.9495	4.4383	4.5214	4.5902	4.0382	3.8911	4.0862	3.8957	4.1504	4.1293	4.2898	4.0236	4.1377	4.0703	4.1271	4.3467	4.2303	4.3306	4.348	4.3466	4.2932	4.3511	pos_147	metab_146	253.044	0.5488	pos	-	-	-	-	-	0.0618625
metab_147	-	-	-	4.8496	4.9781	4.8014	4.5111	4.8566	4.6005	4.9392	4.8221	4.843	4.7651	4.738	4.6197	4.2176	4.3221	4.433	4.6962	4.6088	4.7448	4.6117	4.6001	4.5783	4.6856	4.6714	4.7837	4.7568	4.7644	4.7565	4.786	pos_148	metab_147	299.04	0.5295	pos	-	-	-	-	-	0.0323109
metab_148	-	-	-	4.649	4.7954	4.6087	3.2252	4.5509	4.4665	4.4947	4.9393	3.4384	4.2185	4.6276	4.9524	4.8902	5.2236	4.9921	4.9696	4.9358	5.1497	5.2331	4.9077	5.0175	4.5675	4.9669	4.3908	4.7381	4.7522	4.7406	4.7316	pos_149	metab_148	214.918	0.5105	pos	-	-	-	-	-	0.0198769
metab_149	-	-	-	4.8541	4.141	4.6175	5.0194	4.8943	4.8059	4.7892	4.5197	4.9961	5.0381	4.9273	5.072	4.9462	4.9728	4.9697	4.7331	4.9752	4.6693	4.5173	4.6377	4.7164	4.9375	4.8693	4.8124	4.813	4.8163	4.8215	4.8234	pos_150	metab_149	134.999	0.5105	pos	-	-	-	-	-	0.0109376
metab_150	-	-	-	5.6725	5.8076	5.8704	5.2475	5.5104	5.4917	5.4264	5.5633	5.5568	5.601	5.5176	6.5079	6.1962	6.5507	6.0256	6.442	5.9391	6.446	6.4391	6.3497	6.4377	6.4734	5.9498	6.4589	6.0553	6.0556	6.0697	6.0618	pos_151	metab_150	319.161	0.57	pos	-	-	-	-	-	0.0156028
metab_151	-	-	-	4.926	4.8864	4.8948	4.5379	4.9107	4.8946	4.9042	4.8848	4.9671	5.05	4.8001	5.1979	5.1392	5.2048	5.1421	5.097	5.1813	5.1223	5.1632	5.1472	5.1706	5.1484	5.1471	5.2093	5.0148	5.0267	5.0283	5.0302	pos_152	metab_151	196.108	0.5905	pos	-	-	-	-	-	0.0158655
metab_152	-	-	-	5.5087	5.4168	5.3759	5.035	5.5088	5.4531	5.512	5.522	5.4643	5.4947	5.4067	5.933	5.9192	5.8472	5.8722	5.8757	5.8416	5.8463	5.7866	5.8147	5.8138	5.7758	5.8357	5.9083	5.6233	5.6372	5.6328	5.6455	pos_153	metab_152	273.144	0.5905	pos	-	-	-	-	-	0.0212363
metab_153	-	-	-	5.0527	5.065	4.9745	4.6879	5.0868	4.9663	4.8676	4.9516	5.0688	5.0885	4.9771	5.4809	5.4785	5.4593	5.4663	5.3935	5.4906	5.3929	5.3729	5.3576	5.4702	5.3409	5.3813	5.4043	5.2218	5.2089	5.2238	5.2257	pos_154	metab_153	271.129	0.6653	pos	-	-	-	-	-	0.0173239
metab_154	-	-	-	5.0247	5.0878	4.8613	4.5507	4.9701	4.8428	4.7633	4.8883	4.9266	5.0126	4.9577	5.4197	5.5993	5.5098	5.4433	5.3814	5.4042	5.4067	5.4012	5.3764	5.4815	5.3183	5.3324	5.4015	5.1875	5.1826	5.1919	5.1591	pos_155	metab_154	372.213	0.5905	pos	-	-	-	-	-	0.0332328
metab_155	-	-	-	4.9711	4.9615	4.9051	4.3632	4.991	4.8183	4.797	4.8509	4.9584	4.9237	4.9018	5.307	5.358	5.2964	5.3472	5.2824	5.3564	5.276	5.2312	5.276	5.3825	5.1534	5.2364	5.2527	5.0758	5.0715	5.0577	5.0658	pos_156	metab_155	269.15	0.6653	pos	-	-	-	-	-	0.0180671
metab_156	-	-	-	4.9862	4.9617	4.7845	4.5768	4.9582	4.7759	4.8303	4.8437	4.856	4.9184	4.8335	5.278	5.3705	5.316	5.3509	5.3145	5.3534	5.3087	5.2501	5.2454	5.4003	5.2454	5.2927	5.318	5.0856	5.0935	5.078	5.0913	pos_157	metab_156	253.155	0.6653	pos	-	-	-	-	-	0.0158265
metab_157	-	-	-	4.8484	5.1296	4.6663	4.7722	5.1284	5.0638	5.0957	5.0563	5.1628	4.8048	5.0451	5.0718	5.0315	5.0633	5.0029	5.0063	5.0363	5.0162	5.0084	4.9478	5.0426	4.9974	5.0346	5.0139	5.0191	5.0195	5.03	5.0317	pos_158	metab_157	215.139	0.9149	pos	-	-	-	-	-	0.0154407
metab_158	-	-	-	4.7622	4.7265	4.6588	4.5632	4.7806	4.6904	4.6149	4.6595	4.7664	4.8245	4.8793	4.9409	4.8617	4.9148	4.8398	4.9324	4.776	4.9427	4.8856	4.8254	4.9139	5.0131	4.8638	4.8886	4.7714	4.7577	4.7828	4.7845	pos_159	metab_158	158.093	0.9149	pos	-	-	-	-	-	0.0283148
Isoleucyl-Hydroxyproline	-	HMDB0028908	C11H20N2O4	5.3688	5.3501	5.3266	4.9897	5.2927	5.2245	5.2683	5.2884	5.3436	5.3475	5.2737	5.6532	5.6655	5.6228	5.6008	5.5872	5.6679	5.6323	5.6297	5.6041	5.674	5.6344	5.6822	5.5946	5.4778	5.4781	5.4851	5.5009	pos_160	metab_159	209.129	0.9149	pos	M+H-2H2O, M+H, M+ACN+Na	-	53.5	0.44092	-	0.0251396
metab_160	-	-	-	5.0443	5.0505	4.9287	4.7675	5.0185	4.9671	5.0576	5.0087	5.1357	5.0974	5.0167	5.3175	5.3092	5.2836	5.2965	5.2592	5.3062	5.295	5.2951	5.2037	5.3319	5.2725	5.2828	5.2818	5.1312	5.1312	5.1418	5.1493	pos_161	metab_160	181.097	0.9149	pos	-	-	-	-	-	0.0203618
metab_161	-	-	-	5.0353	5.0387	4.9878	4.7868	5.053	4.9738	5.0127	4.9499	5.1456	5.1695	5.0344	5.4289	5.4413	5.4413	5.4135	5.3314	5.4661	5.3322	5.3901	5.3078	5.4179	5.3696	5.4252	5.3622	5.2285	5.2171	5.2282	5.2301	pos_162	metab_161	199.108	0.9149	pos	-	-	-	-	-	0.0136676
metab_162	-	-	-	4.6263	4.608	4.4835	4.2729	4.5342	4.4359	4.4511	4.5487	4.6624	4.6393	4.5862	4.7309	4.8411	4.7387	4.7476	4.7743	4.746	4.7685	4.7638	4.6838	4.7964	4.7194	4.7128	4.7102	4.6004	4.6428	4.6416	4.6431	pos_163	metab_162	179.118	0.9149	pos	-	-	-	-	-	0.0472866
metab_163	-	-	-	3.3579	2.9847	3.2205	4.0582	3.8389	3.7371	3.6435	3.0879	3.8741	3.8663	3.5642	4.3364	3.822	3.9502	3.917	3.3295	3.9332	3.1289	4.0674	3.1694	3.2067	3.8156	4.0412	3.0771	3.6494	3.6249	3.6576	3.6594	pos_164	metab_163	156.051	0.7429	pos	-	-	-	-	-	0.0360021
metab_164	-	-	-	4.2276	3.7181	3.9972	4.2325	4.397	4.1948	3.9975	4.0416	4.4293	4.3677	4.1175	4.751	4.4243	4.4564	4.4265	4.1708	4.4574	4.1608	4.1716	4.2137	4.0436	4.3153	4.302	4.3059	4.2028	4.2204	4.2122	4.2217	pos_165	metab_164	142.035	0.7629	pos	-	-	-	-	-	0.0199992
metab_165	-	-	-	5.2042	5.2875	5.3358	5.9093	5.7256	5.9808	6.0662	5.8238	5.4807	5.9444	5.7334	5.3016	5.2241	5.1881	5.2344	5.1804	5.2319	5.1881	5.2017	5.1879	5.2179	5.3254	5.1886	5.18	5.6079	5.6122	5.6118	5.6136	pos_166	metab_165	147.044	0.9915	pos	-	-	-	-	-	0.00566016
metab_166	-	-	-	4.9818	5.0235	4.7488	4.4357	5.0905	4.8724	4.8697	4.96	4.9819	4.9621	4.8991	5.435	5.4746	5.4366	5.4835	5.4088	5.4792	5.3522	5.2851	5.3521	5.4582	5.2507	5.3696	5.3798	5.1265	5.148	5.1245	5.1264	pos_167	metab_166	252.171	0.6653	pos	-	-	-	-	-	0.0259183
metab_167	-	-	-	4.415	4.3635	4.3819	4.1268	4.2851	4.2532	4.3171	4.3781	4.4036	4.3124	4.313	4.4097	4.4364	4.4537	4.4942	4.4845	4.5235	4.4827	4.4568	4.5616	4.4495	4.4496	4.3462	4.5494	4.3844	4.3631	4.3554	4.3576	pos_168	metab_167	85.0654	0.609	pos	-	-	-	-	-	0.0308594
metab_168	-	-	-	5.2058	5.0405	5.0378	5.2394	5.2558	5.4796	5.4322	5.3954	5.2862	5.209	5.3153	5.2491	5.2554	5.2016	5.2561	5.1755	5.2971	5.2419	5.2436	5.2771	5.1551	5.1659	5.2244	5.2427	5.2114	5.2117	5.2179	5.2428	pos_169	metab_168	126.055	0.9149	pos	-	-	-	-	-	0.0347951
Phenylacetaldehyde	C00601	HMDB0006236	C8H8O	6.7353	6.7172	6.6155	5.8197	6.4065	5.4842	5.4267	6.5074	6.6454	6.294	6.7432	6.1916	6.221	6.2853	6.3348	6.4978	6.4148	6.5135	6.5378	6.5567	6.5103	6.4371	6.5546	6.5075	6.4365	6.4421	6.4401	6.4408	pos_170	metab_169	121.065	1.0316	pos	M+H, M+NH4, M+H-H2O	55	-	1.90342	122-78-1	0.00546319
metab_170	-	-	-	4.6817	4.7652	4.5969	4.2763	5.2057	5.2291	5.3154	5.2691	5.3108	5.1209	5.1368	5.1182	4.9709	5.1029	5.0054	5.1207	5.0947	5.099	5.1551	5.3525	4.8612	4.923	5.2205	5.0914	5.0628	5.0631	5.0589	5.0599	pos_171	metab_170	132.077	0.609	pos	-	-	-	-	-	0.00480283
metab_171	-	-	-	4.6628	4.4066	4.3983	4.3658	4.5604	4.6618	4.4193	4.4432	4.689	4.8117	4.1086	4.9379	4.6993	4.7714	4.5177	4.5045	4.7138	4.4975	4.4543	4.4337	4.5618	4.471	4.751	4.5396	4.5284	4.5393	4.539	4.5408	pos_172	metab_171	142.05	1.0734	pos	-	-	-	-	-	0.0129969
2-(1,2,3,4-Tetrahydroxybutyl)-6-(2,3,4-trihydroxybutyl)pyrazine	-	HMDB0034894	C12H20N2O7	5.3037	5.2807	5.222	5.0792	5.2295	5.1656	5.1752	5.1517	5.3239	5.2836	5.1996	5.9858	5.9945	5.9522	5.9634	5.9618	5.9976	5.9612	5.783	5.8564	5.991	5.817	5.8491	5.8989	5.7305	5.7272	5.719	5.7322	pos_173	metab_172	305.134	0.8929	pos	M+H-H2O, M+H, M+H-2H2O	-	61.1	0.211938	36806-15-2	0.0134415
metab_173	-	-	-	4.7158	4.5854	5.9013	3.7835	4.2814	4.7449	4.6741	4.6458	4.2346	4.9479	5.4139	4.6473	4.7915	4.6392	4.5757	4.5684	4.5495	4.4445	4.3275	4.2222	4.4432	4.3788	4.27	4.3581	4.9017	4.94	4.9016	4.9035	pos_174	metab_173	361.197	1.0943	pos	-	-	-	-	-	0.0443808
metab_174	-	-	-	4.8651	4.8178	4.7215	4.6864	4.8607	4.808	4.8805	4.7501	4.9622	4.8663	4.8582	5.0559	5.0257	4.9817	4.9757	4.9808	4.9952	4.9892	5.0266	4.9388	4.9574	4.9738	4.9818	4.9735	4.8711	4.8716	4.8762	4.9101	pos_175	metab_174	110.06	0.9149	pos	-	-	-	-	-	0.0438959
metab_175	-	-	-	4.6785	3.963	4.3471	4.1864	4.5677	4.3125	4.06	4.1615	4.653	4.1945	4.1219	4.6245	4.7041	4.8296	4.825	4.7432	4.6948	4.6613	4.6282	4.4558	4.5279	4.4609	4.5159	4.5092	4.4138	4.4004	4.4003	4.4391	pos_176	metab_175	97.0289	0.9149	pos	-	-	-	-	-	0.0426989
metab_176	-	-	-	5.0821	5.0826	4.9354	4.6259	5.04	4.9243	4.9039	4.9262	4.9883	5.1217	4.9661	5.4363	5.4708	5.4179	5.4346	5.4031	5.4494	5.4229	5.3232	5.2988	5.4366	5.309	5.4215	5.3938	5.1838	5.1799	5.1794	5.2032	pos_177	metab_176	239.139	0.6269	pos	-	-	-	-	-	0.0262446
metab_177	-	-	-	4.7106	4.6671	4.68	4.5046	4.6887	4.5916	4.5985	4.5874	4.7684	4.7117	4.6739	4.9461	4.9987	4.9848	4.9765	4.9309	4.9588	4.9306	4.8302	4.8796	5.0286	4.8401	4.9583	4.9352	4.7736	4.769	4.7518	4.7753	pos_178	metab_177	223.108	0.6653	pos	-	-	-	-	-	0.0244729
metab_178	-	-	-	4.6967	4.7484	4.6934	4.5011	4.7068	4.7274	4.7364	4.6868	4.8871	4.7698	4.7138	5.0692	5.0106	5.0551	5.0256	5.0141	5.0132	4.9648	5.0395	4.9806	5.0279	4.9148	4.9975	5.0128	4.8284	4.8286	4.8282	4.8529	pos_179	metab_178	127.087	0.6464	pos	-	-	-	-	-	0.0286319
metab_179	-	-	-	4.2501	3.6217	3.9017	4.6926	4.6879	4.4859	4.4198	4.7919	4.5414	4.1244	4.9821	3.1645	3.61	3.5949	3.7378	3.8653	4.4708	3.348	3.9821	4.0113	3.3225	2.6695	3.4965	2.953	4.2934	4.3023	4.3019	4.3038	pos_180	metab_179	119.035	1.2012	pos	-	-	-	-	-	0.0107876
metab_180	-	-	-	5.035	4.8993	4.8572	4.9032	5.0119	5.0011	4.9845	4.9457	5.1272	5.1203	5.0128	5.2653	5.1595	5.1641	5.157	5.0837	5.1831	5.083	5.1001	5.0805	5.1223	5.0537	5.1449	5.1032	5.0366	5.0409	5.0344	5.0529	pos_181	metab_180	198.076	0.6653	pos	-	-	-	-	-	0.0191172
metab_181	-	-	-	4.501	4.4197	4.2767	4.1162	4.5198	4.3777	4.4266	4.3527	4.5577	4.4396	4.4458	4.9064	4.993	4.8878	4.901	4.8562	4.9305	4.9369	4.7131	4.7708	4.871	4.7385	4.8689	4.7666	4.6393	4.6786	4.6677	4.6794	pos_182	metab_181	193.097	0.6653	pos	-	-	-	-	-	0.0424185
metab_182	-	-	-	5.068	4.9714	4.9779	4.7361	4.9725	4.8459	4.9785	4.9546	5.0802	5.007	4.9711	5.3517	5.3426	5.3341	5.3018	5.2522	5.3722	5.2697	5.2746	5.3032	5.2972	5.1979	5.2424	5.2805	5.0897	5.109	5.1086	5.111	pos_183	metab_182	187.108	0.6653	pos	-	-	-	-	-	0.0227132
metab_183	-	-	-	4.7455	4.7393	4.518	4.5177	4.6532	4.5369	4.5325	4.5297	4.6376	4.7373	4.6065	5.0786	4.989	4.9353	5.0539	5.0354	5.0321	5.0965	5.0047	5.0111	5.1209	4.9427	4.9709	5.0015	4.8186	4.8564	4.8556	4.8505	pos_184	metab_183	290.139	1.2669	pos	-	-	-	-	-	0.0405758
metab_184	-	-	-	4.7626	4.809	4.6539	4.4143	4.7845	4.6811	4.776	4.6444	4.8482	4.8566	4.6743	5.1226	4.9851	5.0251	4.9603	4.9456	4.9798	4.9825	4.9848	5.0067	5.0249	4.9355	4.993	4.9314	4.852	4.8523	4.8536	4.8662	pos_185	metab_184	183.077	0.6653	pos	-	-	-	-	-	0.0158005
metab_185	-	-	-	5.2728	5.1388	5.1718	5.0225	5.2222	5.1493	5.1065	5.1796	5.2618	5.2714	5.1456	5.2639	5.246	5.2706	5.3013	5.1748	5.2855	5.1491	5.0718	5.0869	5.1546	5.0493	5.1486	5.1358	5.1451	5.1476	5.1449	5.159	pos_186	metab_185	174.076	0.6653	pos	-	-	-	-	-	0.0154681
metab_186	-	-	-	4.7889	4.7693	4.8603	4.5058	4.6506	4.6001	4.7592	4.6668	4.6967	4.7332	4.6456	4.9998	5.0165	4.9229	4.9686	4.9456	5.0473	4.9747	4.9393	4.8899	5.0011	4.9581	4.9641	4.9444	4.8547	4.8511	4.8684	4.8447	pos_187	metab_186	296.161	1.3519	pos	-	-	-	-	-	0.0231634
metab_187	-	-	-	5.0875	5.0695	5.3303	4.7241	5.0073	4.9512	5.0315	5.0373	5.0324	5.2221	5.183	5.1695	5.2234	5.1742	5.189	5.1232	5.2513	5.2232	5.1505	5.1399	5.2522	5.1593	5.1632	5.1704	5.1359	5.1362	5.1391	5.1456	pos_188	metab_187	338.207	1.3519	pos	-	-	-	-	-	0.0103828
metab_188	-	-	-	4.953	4.9259	4.8824	4.7372	4.9437	4.8123	4.8299	4.8293	4.8591	5.0123	4.8943	5.2565	5.2348	5.2114	5.199	5.1979	5.2672	5.2162	5.1642	5.0944	5.2151	5.2192	5.179	5.1554	5.0321	5.0324	5.0461	5.0389	pos_189	metab_188	334.176	1.3519	pos	-	-	-	-	-	0.0152207
metab_189	-	-	-	5.0184	5.0026	4.91	4.7089	5.0241	4.9406	5.0938	4.9599	5.1403	5.0967	5.023	5.2136	5.1724	5.1664	5.1584	5.0928	5.2576	5.1717	5.1925	5.1589	5.1738	5.13	5.1508	5.1624	5.084	5.0886	5.0839	5.0985	pos_190	metab_189	212.092	1.3719	pos	-	-	-	-	-	0.0159494
metab_190	-	-	-	5.0337	4.9765	4.911	4.6551	4.9115	4.7898	4.8103	4.8062	4.8978	5.0132	4.7805	5.2474	5.2412	5.2434	5.1722	5.1902	5.2309	5.238	5.0756	5.0747	5.2167	5.136	5.164	5.1298	5.0335	5.0367	5.0413	5.0431	pos_191	metab_190	369.166	1.3719	pos	-	-	-	-	-	0.0100244
metab_191	-	-	-	4.3715	4.1609	4.1273	4.2463	4.171	4.1786	3.9952	4.2555	4.1113	4.4394	3.9363	4.6971	4.6219	4.4747	4.5668	4.516	4.6516	4.6633	4.4888	4.5312	4.6107	4.5559	4.6032	4.5083	4.413	4.3858	4.3714	4.3729	pos_192	metab_191	448.186	1.3931	pos	-	-	-	-	-	0.0450236
metab_192	-	-	-	4.8788	4.9115	5.0059	4.7208	4.906	4.8489	4.8641	4.8284	4.8996	4.835	4.8311	5.2154	5.214	5.18	5.1716	5.17	5.2314	5.1119	5.1686	5.1336	5.2531	5.1874	5.2428	5.2207	5.0513	5.0531	5.0704	5.0533	pos_193	metab_192	195.149	1.4144	pos	-	-	-	-	-	0.0208358
metab_193	-	-	-	4.8148	4.6734	4.5711	4.3353	4.8496	4.6637	4.6333	4.6544	4.7653	4.8472	4.6804	5.5945	5.5908	5.6487	5.6312	5.6496	5.6767	5.5112	5.3924	5.3975	5.5713	5.3885	5.5117	5.4822	5.2857	5.2794	5.2823	5.2897	pos_194	metab_193	333.145	1.4144	pos	-	-	-	-	-	0.0102044
metab_194	-	-	-	4.8826	4.3762	4.6701	5.1586	5.1512	5.066	4.9283	5.0386	4.7965	5.092	5.3544	4.4031	4.3915	4.3616	4.3267	4.3812	4.6241	4.3953	4.511	4.4526	4.2431	4.3942	4.3448	4.3238	4.7604	4.7606	4.7607	4.7701	pos_195	metab_194	127.05	1.4144	pos	-	-	-	-	-	0.0109788
metab_195	-	-	-	4.9191	5.2082	4.5302	5.4131	5.206	5.2767	4.7461	4.7308	5.4244	4.7425	5.0935	4.6251	4.6653	4.947	4.7563	4.6814	4.8854	4.6369	4.5185	4.6247	4.7213	4.5036	4.6111	4.484	4.9448	4.9484	4.948	4.9355	pos_196	metab_195	367.151	1.3931	pos	-	-	-	-	-	0.0136847
metab_196	-	-	-	4.6837	4.7962	4.4433	4.22	4.8342	4.7733	4.6871	4.6825	4.8428	4.8353	4.7034	4.9563	5.0161	4.9905	5.0019	4.8779	4.9533	4.8671	4.8881	4.8452	4.8877	4.8518	4.9516	4.8159	4.8408	4.783	4.8368	4.8312	pos_197	metab_196	352.15	1.3719	pos	-	-	-	-	-	0.0601488
metab_197	-	-	-	4.6598	4.6681	4.4642	4.2827	4.6127	4.546	4.6405	4.6823	4.8597	4.6517	4.7412	5.0753	5.0797	5.0511	5.114	5.0835	5.0977	5.0124	5.121	5.1028	4.9998	5.1031	5.0777	5.079	4.8856	4.9095	4.9148	4.9056	pos_198	metab_197	315.17	1.3931	pos	-	-	-	-	-	0.0290028
metab_198	-	-	-	5.2993	5.33	5.2216	5.0411	5.2906	5.2137	5.205	5.1487	5.3434	5.3682	5.2265	5.5009	5.4866	5.4678	5.4517	5.4196	5.5167	5.4603	5.4543	5.3905	5.5168	5.4722	5.4649	5.4852	5.3631	5.3755	5.3751	5.377	pos_199	metab_198	239.139	1.3931	pos	-	-	-	-	-	0.0147101
metab_199	-	-	-	5.7981	5.1427	5.7194	4.8475	5.1003	5.3526	4.918	5.1906	4.8565	5.6618	5.2077	4.5499	5.1238	4.6014	4.6499	4.7566	4.8886	4.9588	4.9006	4.938	5.1689	5.1798	4.6593	5.4567	5.223	5.2348	5.2344	5.2362	pos_200	metab_199	275.197	1.3931	pos	-	-	-	-	-	0.0140348
metab_200	-	-	-	4.6275	4.6606	4.5516	4.4196	4.6306	4.5561	4.4901	4.4405	4.6713	4.742	4.7453	5.111	5.0779	5.1248	5.0555	5.0233	5.1203	5.0202	4.9539	4.9203	5.1267	4.9986	4.996	5.0037	4.8705	4.885	4.8893	4.8818	pos_201	metab_200	401.218	1.4939	pos	-	-	-	-	-	0.0184283
metab_201	-	-	-	5.3028	5.2611	5.1521	4.9821	5.2278	5.1168	5.2201	5.0988	5.2909	5.3064	5.1599	5.5147	5.4621	5.4709	5.4717	5.4278	5.5331	5.42	5.4336	5.3796	5.4775	5.4476	5.4969	5.4559	5.3284	5.3288	5.3342	5.3363	pos_202	metab_201	190.086	1.3931	pos	-	-	-	-	-	0.00905045
metab_202	-	-	-	4.7589	4.8097	4.7093	4.5036	4.7433	4.6208	4.6606	4.6017	4.7316	4.8687	4.7061	5.1455	5.085	4.9755	5.1116	5.0235	5.0804	5.0539	5.1531	4.9848	5.0348	4.9749	4.9155	5.1111	4.8817	4.8818	4.8895	4.9013	pos_203	metab_202	249.087	1.515	pos	-	-	-	-	-	0.0213659
metab_203	-	-	-	5.5857	5.3854	5.3699	5.21	5.2427	5.1621	5.2739	5.1591	5.3139	5.3368	5.2134	5.4552	5.4277	5.3864	5.3784	5.358	5.5086	5.4082	5.3742	5.3223	5.5196	5.4759	5.4127	5.378	5.3489	5.3534	5.3579	5.3597	pos_204	metab_203	220.133	1.515	pos	-	-	-	-	-	0.0110984
metab_204	-	-	-	5.3172	5.4061	5.2782	5.0473	5.4133	5.3436	5.5531	5.414	5.6482	5.3841	5.5687	5.6297	5.5153	5.4645	5.5471	5.5921	5.819	5.4372	5.6217	5.5544	5.4413	5.3897	5.5119	5.5248	5.468	5.4819	5.4812	5.483	pos_205	metab_204	215.139	1.515	pos	-	-	-	-	-	0.0161268
metab_205	-	-	-	4.5385	4.6909	4.7216	4.3631	4.6511	4.3835	4.4088	4.6721	4.5235	4.6988	4.561	4.6224	4.7372	4.7099	4.5412	4.6596	4.6625	4.8342	4.6229	4.6155	4.8231	4.6744	4.6158	4.6424	4.5693	4.505	4.5044	4.5062	pos_206	metab_205	420.213	1.5367	pos	-	-	-	-	-	0.0764717
metab_206	-	-	-	4.9849	4.9776	4.9144	4.7704	4.9094	4.9141	4.8746	4.8169	4.9669	5.0481	4.9215	5.1719	5.058	5.144	5.0407	5.076	5.2126	5.1656	5.1113	5.0608	5.2126	5.1844	5.199	5.1874	4.9976	5.0454	5.0417	5.0469	pos_207	metab_206	303.134	1.5564	pos	-	-	-	-	-	0.05294
metab_207	-	-	-	4.8703	4.9396	4.9426	4.6746	4.8138	4.7007	4.7191	4.6811	4.8377	4.9092	4.7187	4.8617	4.8969	4.847	4.8397	4.9045	4.9704	4.9308	4.8719	4.8593	5.0301	4.9097	4.8349	4.8306	4.8228	4.8236	4.8717	4.8387	pos_208	metab_207	366.203	1.5564	pos	-	-	-	-	-	0.0536746
metab_208	-	-	-	5.0436	5.0414	4.9418	4.6956	4.9918	4.9137	4.9822	4.8924	5.0704	5.0537	4.9978	5.2191	5.2103	5.1863	5.1457	5.1563	5.2693	5.1961	5.1202	5.1389	5.2447	5.1611	5.2054	5.1597	5.0607	5.0771	5.0749	5.0786	pos_209	metab_208	293.15	1.5564	pos	-	-	-	-	-	0.0187794
metab_209	-	-	-	4.9675	4.8621	5.166	4.6005	4.7854	4.6724	4.874	4.8969	4.9559	4.9185	4.9093	4.9069	4.7342	4.9011	4.727	4.6741	4.8947	5.0206	5.6838	5.216	5.1666	5.263	5.3281	5.4628	5.0038	5.0697	5.0689	5.0633	pos_210	metab_209	331.197	1.5785	pos	-	-	-	-	-	0.0707589
metab_210	-	-	-	5.1738	5.128	5.0029	4.911	5.0443	5.0623	5.0629	5.0194	5.1782	5.2118	5.0898	5.3432	5.3049	5.3246	5.3301	5.4048	5.4182	5.3228	5.3571	5.2536	5.342	5.2852	5.2851	5.3106	5.1867	5.1864	5.1943	5.1914	pos_211	metab_210	309.145	1.5785	pos	-	-	-	-	-	0.00878332
metab_211	-	-	-	5.1194	5.0823	5.0504	4.8752	5.1692	5.1008	5.1654	5.1065	5.2537	5.1829	5.1142	5.8608	5.7923	5.8165	5.8656	5.9053	5.6156	5.7317	5.8317	5.8112	5.7598	5.7216	5.8844	5.8211	5.5483	5.5433	5.5601	5.5478	pos_212	metab_211	176.107	1.6	pos	-	-	-	-	-	0.0166606
N-Vinyl-2-pyrrolidone	C19548	-	C6H9NO	5.0837	5.0688	4.942	4.7009	4.8807	4.8557	4.9662	4.7711	4.9525	5.0589	4.85	5.1458	5.0892	5.1137	5.1218	5.1141	5.1307	5.0405	5.038	5.0508	5.1216	5.093	5.0833	5.0793	4.9915	4.9917	4.9897	4.9923	pos_213	metab_212	223.144	1.6	pos	M+H-H2O, M+H, 2M+H	50.3	-	4.59065	-	0.00255396
metab_213	-	-	-	4.5557	4.522	4.4905	4.3116	4.5524	4.4224	4.5791	4.4962	4.629	4.624	4.5529	4.8704	4.8089	4.7096	4.6866	4.8121	4.8578	5.0818	5.171	5.1327	5.023	5.0819	5.2198	5.145	4.8084	4.8321	4.8391	4.8399	pos_214	metab_213	257.15	1.5564	pos	-	-	-	-	-	0.0334302
metab_214	-	-	-	5.0962	5.0129	4.8754	4.7008	4.9878	4.8556	4.8717	4.8623	4.9946	5.0564	4.9238	5.2794	5.2808	5.2438	5.2278	5.1807	5.3193	5.281	5.219	5.1419	5.321	5.1858	5.2475	5.256	5.1146	5.1158	5.1176	5.1124	pos_215	metab_214	321.145	1.3719	pos	-	-	-	-	-	0.00497734
metab_215	-	-	-	5.0258	5.1486	5.1507	4.0824	4.8458	4.7809	4.5889	4.8062	4.7755	4.9657	4.7252	5.3819	5.443	5.4426	5.4046	5.4101	5.6583	5.3019	5.3129	5.2278	5.476	5.3014	5.2334	5.2184	5.2187	5.2224	5.2125	5.2143	pos_216	metab_215	317.15	1.3719	pos	-	-	-	-	-	0.0103202
metab_216	-	-	-	3.8229	3.8576	3.9215	3.9967	3.9398	3.8919	3.8168	3.5217	3.8238	4.0839	3.8427	4.1966	3.9199	4.0477	4.0139	4.1418	4.2217	3.8666	3.9175	3.7274	3.9232	3.9121	3.9734	3.7777	3.8662	3.8287	3.8477	3.8322	pos_217	metab_216	243.08	1.6403	pos	-	-	-	-	-	0.0397913
metab_217	-	-	-	5.1306	5.127	5.0093	4.8319	5.1021	5.0071	4.9695	5.015	5.0267	5.1333	5.014	5.3158	5.3479	5.2865	5.3087	5.3304	5.3145	5.3013	5.2083	5.2753	5.3532	5.2566	5.2308	5.2699	5.1518	5.1519	5.1494	5.1298	pos_218	metab_217	363.156	1.6403	pos	-	-	-	-	-	0.0243028
metab_218	-	-	-	4.6298	4.6845	4.5266	4.5231	4.6871	4.6621	4.8	4.6063	4.8244	4.7161	4.733	5.1762	5.0427	4.9865	4.8947	4.9106	5.0737	5.0249	5.0191	5.0294	5.0556	4.9057	5.0349	4.9339	4.8399	4.8367	4.8812	4.8478	pos_219	metab_218	217.082	1.3519	pos	-	-	-	-	-	0.0479478
metab_219	-	-	-	4.7169	4.8176	5.1509	4.3787	4.1504	4.0942	3.8981	4.3642	3.7491	4.1975	4.2969	3.786	3.7213	3.905	3.9034	3.7392	3.8756	4.2295	3.9175	4.0533	4.5696	4.5295	3.9513	3.9566	4.3324	4.3447	4.3287	4.3305	pos_220	metab_219	366.239	1.6596	pos	-	-	-	-	-	0.0168058
metab_220	-	-	-	4.8959	4.8904	5.0207	4.3331	4.7474	4.7455	4.8185	4.7035	4.8379	4.7758	4.7512	4.9185	4.8896	4.8821	4.8457	4.8176	4.9785	4.919	4.947	4.8695	4.9141	4.9071	4.8638	5.0521	4.8372	4.8374	4.841	4.8429	pos_221	metab_220	266.15	1.3519	pos	-	-	-	-	-	0.00641978
metab_221	-	-	-	5.0884	5.1079	5.0843	4.7191	5.0799	4.9041	5.1155	5.0531	5.2646	5.0398	5.2066	5.3475	5.3547	5.2921	5.3085	5.3326	5.473	5.3055	5.2866	5.2815	5.3755	5.2995	5.3048	5.3117	5.1863	5.1953	5.1949	5.1961	pos_222	metab_221	277.155	1.6812	pos	-	-	-	-	-	0.0105011
metab_222	-	-	-	4.8002	4.8209	4.7303	4.5079	4.7374	4.5703	4.5217	4.6287	4.6323	4.8163	4.6355	5.0991	5.0827	5.0595	4.9796	5.0632	5.027	4.9714	4.9285	4.9742	5.0347	4.8994	4.9087	4.8623	4.8034	4.8034	4.8324	4.805	pos_223	metab_222	391.187	1.6812	pos	-	-	-	-	-	0.0333789
metab_223	-	-	-	4.6289	4.467	4.616	4.1903	4.5942	4.5355	4.6759	4.4458	4.5962	4.7407	4.6479	4.7229	4.709	4.6817	4.6652	4.6499	4.7076	4.6664	4.6192	4.6615	4.6959	4.6279	4.7258	4.657	4.6026	4.6029	4.6025	4.6429	pos_224	metab_223	254.139	1.3519	pos	-	-	-	-	-	0.0473527
metab_224	-	-	-	3.9152	3.8956	3.8581	3.5199	4.2027	4.0386	4.096	4.0865	4.1708	4.0792	3.9991	4.0885	4.1622	4.0445	3.9998	4.0847	4.1441	4.1104	4.0548	4.0117	4.1379	4.074	4.1373	4.1958	4.0016	4.0159	4.0757	4.0063	pos_225	metab_224	313.12	1.7029	pos	-	-	-	-	-	0.0820756
metab_225	-	-	-	4.5272	4.6602	4.9273	5.0505	4.7419	4.7269	4.6209	4.7609	4.3293	4.9808	4.8065	4.6442	4.5626	4.6209	4.4485	4.6497	4.571	4.4755	4.3527	4.4728	4.7356	4.6043	4.5549	4.4372	4.6481	4.7099	4.6594	4.6207	pos_226	metab_225	456.213	1.7029	pos	-	-	-	-	-	0.0875331
metab_226	-	-	-	5.0268	5.0506	4.9156	4.2723	5.0689	4.862	4.9544	5.0025	5.0403	4.9638	5.003	5.1586	5.2763	5.2211	5.1775	5.206	5.2526	5.1072	5.0675	5.0842	5.2504	5.1416	5.1023	5.089	5.0685	5.0688	5.078	5.0758	pos_227	metab_226	263.175	1.7249	pos	-	-	-	-	-	0.011131
metab_227	-	-	-	5.0437	4.8816	4.7795	4.8371	5.005	4.8924	4.9059	4.948	4.9782	5.038	4.9985	4.9086	4.9071	5.0193	4.9178	4.9432	4.9162	4.9216	4.8541	4.8891	5.0014	4.9107	4.8119	4.9019	4.9023	4.9029	4.8928	4.8652	pos_228	metab_227	389.171	1.7029	pos	-	-	-	-	-	0.0400801
metab_228	-	-	-	5.2841	4.7521	4.9085	4.6841	5.2943	5.0814	5.2265	5.4007	5.3748	5.1039	5.228	5.5367	5.5419	5.5501	5.6166	5.55	5.3591	5.8633	5.4877	5.9605	5.1135	4.9978	5.8117	6.002	5.4686	5.4693	5.4758	5.4804	pos_229	metab_228	177.055	1.7462	pos	-	-	-	-	-	0.0129287
metab_229	-	-	-	4.67	4.5512	4.6701	4.2814	4.4915	4.4453	4.3326	4.4346	4.3344	4.6285	4.5168	4.6395	4.7315	4.6808	4.5947	4.6708	4.6095	4.6234	4.6254	4.5803	4.6867	4.6733	4.5647	4.7322	4.5742	4.5705	4.5741	4.5719	pos_230	metab_229	371.16	1.7029	pos	-	-	-	-	-	0.00412893
metab_230	-	-	-	6.213	6.2335	6.0414	6.1834	6.2188	6.0949	6.4148	6.2163	6.2368	6.186	6.2585	5.9412	5.8599	5.8671	5.9278	6.2252	6.1029	6.1568	6.1941	6.3249	6.1161	6.3011	6.2296	6.3432	6.1743	6.1746	6.1742	6.1931	pos_231	metab_230	188.071	1.7652	pos	-	-	-	-	-	0.0217439
metab_231	-	-	-	5.3804	5.383	5.2206	5.3342	5.3845	5.2458	5.6123	5.3911	5.4488	5.3411	5.4281	5.1367	5.0571	5.0051	5.1273	5.3996	5.2772	5.3415	5.3718	5.516	5.2893	5.4693	5.4022	5.5209	5.3691	5.3648	5.3605	5.3706	pos_232	metab_231	159.092	1.7652	pos	-	-	-	-	-	0.0104761
metab_232	-	-	-	5.3835	5.6496	5.1595	5.5475	5.7471	5.447	5.3148	5.4025	5.9465	6.1265	5.6563	4.5689	4.7793	4.5967	4.6685	4.6845	4.6775	4.9191	4.6158	4.9118	4.9266	4.822	4.6976	4.8957	5.3819	5.3805	5.3692	5.3529	pos_233	metab_232	564.375	4.3478	pos	-	-	-	-	-	0.0305829
metab_233	-	-	-	4.7639	4.8482	4.6807	4.3602	4.6474	4.4815	4.4614	4.5765	4.6557	4.6302	4.6464	4.1684	4.242	4.2233	4.2241	4.4076	4.1097	4.5343	4.4901	4.5847	4.6805	4.4655	4.3938	4.5624	4.5475	4.523	4.5226	4.5244	pos_234	metab_233	446.25	4.5039	pos	-	-	-	-	-	0.0283003
metab_234	-	-	-	3.8216	3.581	3.9401	3.3598	4.8007	4.3198	3.1938	4.0326	4.3574	3.6551	3.3502	5.2339	4.5561	4.2617	3.8291	3.794	3.9711	3.8915	3.9077	3.6845	3.9428	3.8305	3.9608	3.9047	4.2203	4.1964	4.1641	4.174	pos_235	metab_234	538.281	4.3924	pos	-	-	-	-	-	0.0580794
metab_235	-	-	-	4.0147	4.6251	5.0513	5.0048	4.498	5.0339	5.2961	4.556	3.8388	3.2109	3.7943	2.4545	0.6471	1.5889	1.1679	0.6441	1.1511	0.6425	0.6194	0.6427	0.6614	2.968	0.6607	0.6554	4.497	4.5198	4.4969	4.4986	pos_236	metab_235	391.136	4.5039	pos	-	-	-	-	-	0.026101
metab_236	-	-	-	5.1812	5.2816	5.042	4.7925	5.1219	4.9975	4.9621	5.0412	5.0355	5.2356	5.056	4.8664	4.8192	4.7365	4.7237	4.6472	4.9642	4.4749	4.352	4.4478	4.6549	4.5537	4.5731	4.526	4.9133	4.9155	4.9116	4.9134	pos_237	metab_236	436.269	4.4594	pos	-	-	-	-	-	0.00370012
metab_237	-	-	-	3.7285	3.7443	3.3442	3.0448	3.5184	3.4531	3.381	3.4429	3.5914	3.6761	3.2322	5.1633	5.007	4.9122	4.5321	4.2683	5.139	3.9314	4.2003	3.952	4.2297	4.1417	4.0864	3.8787	4.3453	4.338	4.3355	4.3093	pos_238	metab_237	563.248	4.6149	pos	-	-	-	-	-	0.0356149
metab_238	-	-	-	4.7769	3.2548	4.3517	4.4885	4.2362	4.5109	4.1013	4.6242	3.5545	2.1863	3.7589	3.6832	2.5402	2.7472	3.3213	2.3663	3.3121	3.6406	3.9621	3.8912	3.2314	3.9961	3.6367	3.5121	4.0667	4.0663	4.0692	4.0809	pos_239	metab_238	383.294	4.6815	pos	-	-	-	-	-	0.0159659
metab_239	-	-	-	4.5923	4.7177	4.3659	4.25	4.5583	4.4015	4.3546	4.3218	4.4555	4.6304	4.4574	4.4475	4.9502	5.0926	5.1933	5.2802	5.1807	5.0216	4.3851	5.1857	4.8585	4.3976	4.9901	5.2692	4.7844	4.7832	4.7778	4.786	pos_240	metab_239	416.246	4.7261	pos	-	-	-	-	-	0.00815462
metab_240	-	-	-	5.0113	4.8808	4.9969	4.7682	4.9225	4.8534	4.8255	4.8048	4.9888	4.9295	4.8785	4.7332	4.7477	4.7972	4.7825	4.705	4.7771	4.7285	4.6615	4.7522	4.8477	4.7905	4.8419	4.8077	4.8246	4.8226	4.8289	4.8291	pos_241	metab_240	221.154	4.8818	pos	-	-	-	-	-	0.00734247
13(S)-HOTrE	C16316	-	C18H30O3	5.9808	5.9777	5.9186	5.6574	5.9596	5.7947	5.8775	5.7703	6.0217	5.9581	5.8922	5.9134	5.971	5.951	5.8932	5.979	5.9329	5.9318	5.8514	5.9455	6.0123	5.9635	5.822	5.9777	5.9062	5.9074	5.9103	5.9122	pos_242	metab_241	277.216	4.9262	pos	M+H-2H2O, M+H-H2O, M+H	51.1	-	-0.0883304	-	0.00630378
metab_242	-	-	-	4.1434	4.2339	3.9845	4.6882	3.862	3.4566	3.6903	3.7898	4.0361	4.3112	3.2532	3.5224	3.5712	3.9667	4.6802	4.3002	3.8958	4.5789	4.6523	5.0202	4.7315	5.2044	4.5688	4.763	4.4385	4.4337	4.4243	4.4597	pos_243	metab_242	369.242	4.9485	pos	-	-	-	-	-	0.0347905
metab_243	-	-	-	5.526	5.4915	5.5521	5.6302	5.2635	5.3002	5.125	5.2378	5.3492	5.3339	5.1955	4.4171	4.3151	4.1776	4.6357	4.2849	4.3875	4.8844	5.2639	5.2484	5.0156	5.1204	5.2059	5.1082	5.2167	5.24	5.223	5.1945	pos_244	metab_243	549.34	4.9707	pos	-	-	-	-	-	0.0431449
metab_244	-	-	-	6.0521	4.7823	5.9864	4.8576	5.9285	5.5803	4.7825	5.4632	5.8641	5.2803	5.9901	5.7597	5.9878	5.9244	5.9422	5.9633	5.8614	5.9409	5.7499	5.8215	5.9248	5.8609	5.9004	5.9085	5.7972	5.7808	5.7761	5.7811	pos_245	metab_244	437.341	4.993	pos	-	-	-	-	-	0.0214669
metab_245	-	-	-	4.3762	4.4958	4.2601	3.8898	4.2257	4.0561	4.0615	4.3366	4.2644	4.2223	4.1514	3.9276	3.7652	3.9452	3.8322	4.0078	3.9927	3.6576	3.1964	3.5479	3.5492	2.3054	3.5807	3.5795	4.0303	3.9771	3.9769	3.993	pos_246	metab_245	487.288	5.0154	pos	-	-	-	-	-	0.0591423
metab_246	-	-	-	4.9386	4.7981	4.6568	4.9081	4.8499	4.7471	4.7486	4.8055	4.8973	4.5338	4.8741	4.3819	4.5465	4.7001	4.6495	4.5555	4.3737	4.7219	4.5675	4.9841	4.7559	4.9425	4.8312	4.75	4.7396	4.7497	4.746	4.7518	pos_247	metab_246	377.28	5.1714	pos	-	-	-	-	-	0.012201
metab_247	-	-	-	3.2938	2.1679	2.8748	3.1478	4.1473	2.1434	4.293	2.1228	4.2706	2.8259	2.6718	4.7513	4.8387	4.5942	4.391	4.6886	2.2597	3.5262	3.7929	4.1717	3.5634	3.1404	4.2197	4.2599	4.0722	4.068	4.0994	4.0694	pos_248	metab_247	380.15	5.1936	pos	-	-	-	-	-	0.0347883
metab_248	-	-	-	4.8299	4.6762	4.5672	4.5259	4.8709	4.6393	4.7795	4.5862	4.8557	4.7845	4.6912	4.9081	5.0058	4.9742	5.0464	4.9095	4.9447	4.9086	4.812	4.8692	5.0511	4.9504	4.9253	4.9363	4.8307	4.8309	4.8342	4.8417	pos_249	metab_248	279.232	5.2603	pos	-	-	-	-	-	0.0118215
metab_249	-	-	-	2.0495	4.569	3.9942	1.8205	2.8376	2.0108	4.5538	1.9123	2.545	2.1251	4.5873	2.878	2.0382	2.0441	3.0257	2.559	2.4935	2.0323	2.0025	2.1641	2.0564	2.3114	2.8783	2.2178	3.8542	3.8824	3.8964	3.9034	pos_250	metab_249	310.132	5.4609	pos	-	-	-	-	-	0.0494036
metab_250	-	-	-	5.2404	5.2447	5.5592	4.8423	5.2598	4.4968	4.7952	5.1538	4.9775	5.5952	4.8295	5.779	4.7392	5.5637	5.2368	5.5523	4.9298	5.3454	4.6794	5.121	5.3752	4.8821	5.008	5.2469	5.2103	5.2113	5.1913	5.1576	pos_251	metab_250	709.377	5.4832	pos	-	-	-	-	-	0.0566737
metab_251	-	-	-	2.5255	3.4093	4.4799	4.5472	4.107	4.658	4.1229	4.0781	3.0307	3.4726	3.5826	1.3786	2.5161	2.6693	2.2656	2.5313	1.3873	2.2744	1.95	2.6493	2.3359	1.3682	1.3941	2.8631	3.7895	3.786	3.7825	3.795	pos_252	metab_251	375.18	5.5276	pos	-	-	-	-	-	0.0122787
metab_252	-	-	-	4.8619	4.055	4.3548	4.0744	4.1685	3.9008	4.3544	3.8801	4.1409	4.1063	4.2426	5.4061	4.9533	4.716	4.4624	5.3181	4.921	3.8318	4.1266	3.8867	3.7761	3.7304	3.7715	3.8818	4.5585	4.5567	4.5604	4.5701	pos_253	metab_252	348.214	5.5276	pos	-	-	-	-	-	0.0138593
metab_253	-	-	-	6.3958	6.5536	6.4845	6.4933	6.4526	6.3807	6.4075	6.3764	6.4761	6.3707	6.4085	6.5594	6.5447	6.6457	6.7684	6.7398	6.5903	6.7928	6.9762	6.4962	6.8714	6.8748	6.5497	6.4829	6.5824	6.5738	6.5857	6.5875	pos_254	metab_253	274.274	5.6387	pos	-	-	-	-	-	0.0140054
Cervonoyl ethanolamide	C13828	HMDB0013627	C24H36O3	6.1234	5.2203	6.3837	5.8361	6.0615	6.1347	5.3872	6.1232	6.0161	5.8505	5.8245	5.6351	5.8312	5.7743	5.6725	4.943	5.2113	5.7156	5.7494	5.3783	5.4951	5.5471	5.4971	5.4334	5.8281	5.8282	5.8371	5.8328	pos_255	metab_254	355.263	5.7475	pos	M+H-H2O, M+H, M+H-2H2O	-	54.9	-0.502919	-	0.00990392
metab_255	-	-	-	4.9871	4.6251	4.688	4.5513	5.1305	4.8989	4.8727	4.6987	5.059	4.9494	5.0355	5.8103	5.9456	5.8918	5.639	5.8163	5.694	5.6944	5.3768	5.6879	5.7382	5.8724	5.5397	5.6837	5.465	5.4703	5.4618	5.4597	pos_256	metab_255	444.296	5.8364	pos	-	-	-	-	-	0.0105897
metab_256	-	-	-	5.8476	4.3119	5.3003	5.8287	4.461	5.7831	5.4692	5.7977	4.974	4.6555	5.0131	4.2544	4.3327	4.5581	4.4832	4.2474	4.3859	4.3325	4.2696	4.5592	4.6705	4.7669	4.56	4.5382	5.1899	5.196	5.1816	5.1946	pos_257	metab_256	425.341	5.8587	pos	-	-	-	-	-	0.014925
metab_257	-	-	-	1.9426	3.0623	4.2874	4.2179	4.0743	4.5379	3.9981	3.6591	3.0629	2.9647	2.775	1.9326	2.3396	1.9372	1.9422	1.9275	1.9416	2.3386	1.8956	1.9256	2.6028	1.9219	1.9485	1.9418	3.5469	3.5389	3.5469	3.5084	pos_258	metab_257	389.196	5.9253	pos	-	-	-	-	-	0.0414183
(3beta,5xi,9xi,13alpha,17alpha,18xi)-3-Hydroxy-13,28-epoxyurs-11-en-28-one	-	-	C30H46O3	5.3134	3.6895	5.1026	3.8473	5.0443	4.9006	4.1436	4.7956	5.4534	5.0196	5.637	4.5799	4.8221	4.7692	4.7029	4.8236	4.5954	4.8273	4.362	4.6853	5.3002	5.2433	4.8817	4.7381	4.9539	4.9548	4.9503	4.939	pos_259	metab_258	437.341	5.9253	pos	M+H-H2O, M+H, M+H-2H2O	59.5	-	-0.102287	-	0.0165824
3beta-3-Hydroxy-18-lupen-21-one	-	HMDB0035355	C30H48O2	6.3683	4.6649	6.0776	5.8498	6.9737	5.9457	5.7859	5.5362	6.1319	6.2836	6.2596	6.8094	7.0697	7.0356	6.998	6.9948	6.8709	6.9167	6.6447	6.8818	6.2884	6.1962	6.9437	6.9085	6.6876	6.6793	6.6789	6.6807	pos_260	metab_259	423.362	5.9919	pos	M+H-2H2O, M+H, M+H-H2O	-	65.4	-0.0167318	29367-66-6	0.00932838
metab_260	-	-	-	5.1568	4.3458	5.2321	4.3627	4.6608	4.9344	4.004	4.858	5.1037	5.0292	5.1807	5.0124	3.7478	4.7308	4.4331	4.6967	3.4782	4.515	3.5163	4.1532	5.1865	5.1137	3.8242	4.5057	4.7315	4.7888	4.7525	4.7047	pos_261	metab_260	691.372	6.1037	pos	-	-	-	-	-	0.082217
metab_261	-	-	-	4.8112	3.9823	4.6461	4.4199	5.1806	4.576	4.3078	4.2196	4.6928	4.6128	4.7328	5.0845	5.3008	5.2879	5.2393	5.2068	5.112	5.1404	4.9045	5.1271	4.8117	4.7842	5.1986	5.1642	4.98	4.9597	4.9796	4.9814	pos_262	metab_261	313.252	6.1261	pos	-	-	-	-	-	0.0235754
Soyasaponin IV	-	HMDB0039518	C41H66O13	5.3585	3.4608	5.0616	5.0399	6.096	4.9588	4.8992	4.7207	5.0313	5.4459	5.1247	5.1085	5.5653	5.4791	5.4331	5.4261	5.286	5.3471	4.8961	5.4551	4.8761	4.8735	5.7113	5.2814	5.3521	5.3528	5.3346	5.3361	pos_263	metab_262	789.44	6.2375	pos	M+Na, M+K, M+2Na-H	-	86.8	-0.00463165	108906-97-4	0.0227894
Cavipetin C	-	HMDB0030366	C24H36O4	5.2952	4.1521	5.0742	5.3344	5.194	5.1785	4.5603	4.9891	5.1565	4.8701	5.1251	4.8136	5.0338	5.4055	4.8369	4.3624	5.0719	4.3649	4.8955	5.0582	4.5409	4.607	4.8732	4.5836	4.983	4.9742	4.9775	4.9815	pos_264	metab_263	389.269	6.4134	pos	M+H-H2O, M+H, M+H-2H2O	-	63.3	-0.261066	128552-90-9	0.00915464
metab_264	-	-	-	5.3025	5.1514	5.1162	5.4047	5.3599	5.1901	5.297	5.1057	5.3267	5.3682	5.2558	5.4323	5.6069	5.583	5.5346	5.431	5.5433	5.2651	5.1789	5.3828	5.3609	5.466	5.4177	5.3931	5.3627	5.3617	5.3614	5.3719	pos_265	metab_264	277.216	6.4797	pos	-	-	-	-	-	0.011637
metab_265	-	-	-	5.4308	5.4308	5.1584	5.4326	5.4735	5.4356	5.3725	5.4357	5.4754	5.5617	5.529	3.7273	4.3401	4.1239	4.0735	4.2789	3.5063	3.7612	2.9657	3.9376	3.8126	4.0766	3.8625	3.6822	5.2034	5.1984	5.1911	5.1753	pos_266	metab_265	554.274	6.5912	pos	-	-	-	-	-	0.0280584
metab_266	-	-	-	5.9379	4.0794	5.7522	4.9788	5.9597	5.5585	5.242	5.5115	5.9112	5.3942	5.9893	5.3915	5.7207	5.6164	5.5624	5.6257	5.408	5.5232	5.1596	5.5044	6.0126	6.0533	5.6415	5.4997	5.6731	5.6623	5.6619	5.6638	pos_267	metab_266	439.357	6.5468	pos	-	-	-	-	-	0.0122093
metab_267	-	-	-	4.3762	3.4692	4.1539	4.1447	4.3067	4.024	3.9733	3.9292	4.538	4.2375	3.9837	3.9967	4.261	4.328	4.3487	4.3614	4.4794	4.5198	4.1277	4.5534	4.6502	4.4865	4.504	4.539	4.2705	4.2766	4.2729	4.2811	pos_268	metab_267	435.248	6.5468	pos	-	-	-	-	-	0.0106186
metab_268	-	-	-	5.5431	2.9662	5.3479	3.9713	5.464	4.9901	4.8447	4.3972	5.4185	4.9317	5.5659	3.7314	4.0958	3.8484	3.7771	3.5864	3.5284	3.7912	3.172	4.1019	5.5828	5.5658	4.8514	3.9562	5.0293	5.0026	5.0292	5.0268	pos_269	metab_268	437.341	7.0366	pos	-	-	-	-	-	0.0293832
metab_269	-	-	-	1.1701	2.2211	2.5228	2.2841	1.1279	1.0612	1.0545	2.4835	1.1531	2.952	1.0913	1.1607	2.3873	3.0396	3.0961	3.9127	2.4714	4.135	3.1292	4.2944	4.4788	4.2002	3.9746	4.4132	3.4333	3.4336	3.4481	3.4363	pos_270	metab_269	504.368	6.7918	pos	-	-	-	-	-	0.0162131
Dihydrosphingosine	C00836	LMSP01020001	C18H39NO2	5.3833	6.1899	4.8666	5.1027	5.3088	4.3867	4.912	5.2927	4.7503	4.8059	5.657	4.249	3.8734	3.8924	4.0308	3.8011	4.071	4.5574	4.4596	4.1521	4.2836	4.2745	4.0767	4.265	5.2152	5.227	5.2256	5.2287	pos_271	metab_270	284.295	7.1698	pos	M+H-H2O, M+Na, M+H-2H2O	57.1	-	-0.482828	-	0.0138755
metab_271	-	-	-	5.366	3.8574	5.2758	3.945	5.0374	4.9348	4.1055	4.5986	6.0395	5.6131	6.1905	3.3817	4.0501	4.3713	4.3657	4.5458	4.0138	4.2605	4.1089	4.1569	5.4425	5.4415	4.5775	3.7451	5.2966	5.295	5.2848	5.2965	pos_272	metab_271	439.357	7.1253	pos	-	-	-	-	-	0.0129046
metab_272	-	-	-	4.547	3.6863	4.2786	4.2013	4.1236	3.9069	3.1081	3.7224	4.8579	4.4533	4.9477	2.8024	3.2545	4.3886	2.9842	3.1965	3.8009	3.1253	2.7651	3.8431	4.3301	4.245	4.1736	3.3805	4.1738	4.2025	4.2112	4.2146	pos_273	metab_272	381.315	7.1253	pos	-	-	-	-	-	0.0419487
metab_273	-	-	-	4.7668	4.7025	4.6762	4.7116	4.7301	4.6995	4.6505	4.749	4.741	4.8107	4.8285	4.7966	4.8885	4.8945	4.8159	4.8407	4.8962	4.8714	4.776	4.836	4.8157	4.8369	4.7732	4.784	4.7673	4.7533	4.7362	4.7385	pos_274	metab_273	620.437	7.3926	pos	-	-	-	-	-	0.0334505
metab_274	-	-	-	4.9012	4.8333	4.8144	4.8109	4.841	4.7968	4.7607	4.7953	4.8447	4.8541	4.8944	4.9292	4.9969	4.996	4.9187	4.9149	4.999	4.9066	4.8375	4.9092	4.9123	4.9259	4.927	4.8573	4.8557	4.8535	4.8421	4.8436	pos_275	metab_274	537.34	7.4809	pos	-	-	-	-	-	0.015766
metab_275	-	-	-	5.2268	4.6768	4.5733	5.1776	4.9105	5.2027	5.4619	5.1601	4.9317	5.3947	4.9903	4.7636	5.0162	5.0824	5.0759	4.8825	4.7503	4.6935	4.1858	4.8476	4.9598	4.8169	4.8591	4.7116	5.0165	5.0113	5.0076	5.016	pos_276	metab_275	409.344	7.5702	pos	-	-	-	-	-	0.00972253
metab_276	-	-	-	4.966	5.7955	4.7959	4.5963	4.7926	4.4479	4.8868	5.0858	5.2987	4.6442	5.1813	3.6378	3.486	3.5946	3.8651	3.6298	3.7299	4.2394	4.2716	4.2584	4.1271	4.4831	4.5763	4.0511	4.8927	4.8946	4.8926	4.9167	pos_277	metab_276	310.31	7.5925	pos	-	-	-	-	-	0.0274244
metab_277	-	-	-	3.7382	4.0055	2.8426	4.0518	3.9846	3.6996	3.9627	3.9417	4.3213	3.7097	3.321	4.6161	4.6624	4.5681	4.813	5.5526	3.7446	5.8723	5.5773	6.2742	5.6574	4.1541	5.6514	5.9337	5.2773	5.2678	5.2651	5.2669	pos_278	metab_277	494.324	7.6811	pos	-	-	-	-	-	0.0126874
metab_278	-	-	-	4.829	4.8264	4.7823	4.7525	4.7656	4.7495	4.7079	4.7653	4.8247	4.8605	4.8602	4.8652	4.9264	4.9699	4.9062	4.9132	4.9404	4.9307	4.8127	4.9745	4.8774	4.8672	4.8936	4.9839	4.8167	4.8241	4.8239	4.7985	pos_279	metab_278	493.314	7.5256	pos	-	-	-	-	-	0.0274469
LPC(18:2)	-	-	C26H50NO7P	4.2651	4.3837	3.466	4.5398	4.9975	4.0648	4.2674	3.7576	3.9794	4.0059	3.6081	5.1206	5.4245	5.2199	5.1452	5.5521	4.9509	5.8659	5.6175	6.2433	5.5115	4.813	5.6992	6.0695	5.3195	5.3144	5.3083	5.3097	pos_280	metab_279	520.34	7.9036	pos	M+H, M+Na, M+K	78.1	-	0.497646	-	0.0117259
metab_280	-	-	-	5.1958	4.8526	4.2023	5.0456	4.0203	5.0971	5.0863	5.0413	4.2046	5.3794	3.6878	3.1173	3.4087	4.094	3.7927	3.6301	3.4378	3.6752	2.3036	3.8502	4.016	3.7264	4.2552	3.4379	4.667	4.6631	4.6651	4.6614	pos_281	metab_280	425.341	7.9929	pos	-	-	-	-	-	0.00558667
metab_281	-	-	-	5.2222	5.23	5.1394	5.4845	5.2542	5.1613	5.3575	5.153	5.3082	5.2037	5.2849	5.3955	5.3542	5.3168	5.4146	5.3762	5.2921	5.3372	5.5413	5.3141	5.3039	5.363	5.3759	5.3326	5.3122	5.3125	5.3216	5.3172	pos_282	metab_281	346.272	8.0373	pos	-	-	-	-	-	0.0102993
metab_282	-	-	-	4.81	3.237	4.6796	3.9212	4.738	4.5963	3.8048	4.2917	4.9492	4.4761	4.8551	2.6995	3.3273	3.0102	1.9845	2.2379	2.284	2.6846	1.9379	3.1197	4.8749	4.8325	4.3155	2.7577	4.5785	4.5954	4.5951	4.5912	pos_283	metab_282	568.385	8.1039	pos	-	-	-	-	-	0.0180933
metab_283	-	-	-	4.8194	4.7728	4.6251	3.3648	3.606	3.7188	2.6381	4.6524	3.5891	3.7603	5.4069	2.461	2.4597	2.4656	2.4707	2.9812	2.4701	3.3511	2.5672	4.4551	3.3772	3.7331	2.4771	4.7068	4.3475	4.3441	4.3473	4.3417	pos_284	metab_283	436.34	8.4135	pos	-	-	-	-	-	0.00636417
metab_284	-	-	-	4.5307	4.891	4.557	4.4793	4.39	4.3738	4.7932	4.3812	4.4671	4.3964	4.4612	4.6209	4.6391	4.5746	4.6848	4.9108	4.5576	5.5176	5.2828	5.6356	5.1291	4.5419	5.1114	5.3429	4.9226	4.9158	4.9186	4.904	pos_285	metab_284	480.345	8.5693	pos	-	-	-	-	-	0.0183724
metab_285	-	-	-	6.0522	6.0748	6.0388	6.1295	6.1048	5.9725	6.0958	6.002	6.1584	6.1221	6.1042	6.1499	6.057	6.1305	6.1369	6.166	6.0032	6.1145	6.3045	6.1246	6.0704	6.1296	6.1533	6.1261	6.0983	6.0985	6.1021	6.1039	pos_286	metab_285	198.185	8.6743	pos	-	-	-	-	-	0.00644607
Norbicycloekasantalal	-	HMDB0036719	C11H16O	5.7276	5.7448	5.702	5.8071	5.7587	5.6439	5.7555	5.6642	5.7911	5.7897	5.7613	5.8008	5.7123	5.7803	5.8032	5.8199	5.6481	5.785	5.9717	5.7706	5.7218	5.787	5.8093	5.7841	5.7667	5.7625	5.7636	5.7693	pos_287	metab_286	147.117	8.6944	pos	M+H-H2O, M+NH4, M+H	55.8	-	0.0960269	37720-84-6	0.00705685
2E,6E-Octadienal	-	LMFA06000131	C8H12O	5.8312	5.8657	5.8323	5.9205	5.8901	5.7419	5.8682	5.7954	5.9313	5.8981	5.8881	5.9279	5.8297	5.8976	5.9297	5.9471	5.7765	5.8994	6.093	5.8848	5.8502	5.9141	5.9234	5.897	5.8741	5.8743	5.877	5.8833	pos_288	metab_287	142.123	8.6944	pos	M+H-H2O, M+NH4, M+H	65.5	-	2.6501	-	0.00998975
metab_288	-	-	-	5.31	5.3347	5.286	5.3793	5.3328	5.2306	5.3269	5.2561	5.3831	5.3681	5.3372	5.3606	5.2732	5.3515	5.3693	5.395	5.2157	5.3431	5.5295	5.3403	5.2991	5.3567	5.3565	5.3433	5.3333	5.3255	5.3322	5.3349	pos_289	metab_288	140.107	8.6944	pos	-	-	-	-	-	0.00948402
Perillyl aldehyde	C02576	HMDB0003647;LMPR0102090010	C10H14O	5.679	5.7	5.6529	5.7585	5.7061	5.5963	5.7186	5.6239	5.7401	5.7359	5.7003	5.7415	5.6556	5.7106	5.7428	5.7644	5.5904	5.7097	5.914	5.7069	5.6624	5.7277	5.7422	5.7163	5.7092	5.707	5.7119	5.7137	pos_290	metab_289	133.101	8.6944	pos	M+H-H2O, M+NH4, M+H	67.9	-	0.547749	2111-75-3	0.00679286
metab_290	-	-	-	5.7293	5.7695	5.7427	5.8332	5.8036	5.6513	5.7707	5.6951	5.8408	5.8049	5.8026	5.8367	5.746	5.8052	5.8456	5.8628	5.6864	5.8145	6.0023	5.806	5.7553	5.8252	5.8333	5.8069	5.7834	5.7836	5.7853	5.7887	pos_291	metab_290	128.107	8.6944	pos	-	-	-	-	-	0.0056868
metab_291	-	-	-	5.9161	5.8853	5.8816	5.9371	5.9587	5.7976	5.871	5.838	5.97	5.9419	5.9615	5.9333	5.8989	5.9441	5.963	5.9738	5.8185	5.9211	6.0751	5.9177	5.9013	5.9518	5.9516	5.9253	5.9148	5.913	5.9127	5.9189	pos_292	metab_291	109.102	8.6944	pos	-	-	-	-	-	0.00657774
5-Methyl-5-hexen-2-one	-	HMDB0031551	C7H12O	5.418	5.4481	5.4272	5.5161	5.4831	5.3373	5.451	5.4011	5.5063	5.4932	5.4769	5.5195	5.4285	5.4904	5.5221	5.5337	5.3722	5.4957	5.6759	5.4765	5.4288	5.4903	5.5065	5.4877	5.4615	5.4556	5.4587	5.4665	pos_293	metab_292	95.086	8.6944	pos	M+H-H2O, M+ACN+H, M+H	67.7	-	3.83527	3240-09-03	0.0106412
metab_293	-	-	-	5.5227	5.556	5.5357	5.6074	5.5845	5.4268	5.5364	5.4949	5.6148	5.5961	5.5889	5.6091	5.5288	5.5883	5.6311	5.6357	5.4649	5.5861	5.7681	5.5785	5.542	5.6027	5.6087	5.5805	5.5643	5.5569	5.5626	5.566	pos_294	metab_293	221.226	8.6743	pos	-	-	-	-	-	0.00917266
Longicamphenylone	-	-	C14H22O	5.8609	5.8746	5.7986	5.9156	5.8541	5.7799	5.8709	5.7906	5.9175	5.941	5.8615	5.9085	5.8136	5.8827	5.9038	5.9119	5.7662	5.8797	6.0492	5.8705	5.833	5.8924	5.903	5.8812	5.8717	5.8719	5.8744	5.8814	pos_295	metab_294	189.164	8.6743	pos	M+H, M+NH4, M+H-H2O	83	-	0.00745017	-	0.0104293
metab_295	-	-	-	6.0298	6.047	6.0326	6.1091	6.0886	5.9492	6.0577	5.9769	6.123	6.0838	6.0867	6.1189	6.0346	6.1015	6.1255	6.1425	5.9799	6.1017	6.2796	6.0937	6.0423	6.1105	6.124	6.1026	6.0766	6.0726	6.0785	6.0803	pos_296	metab_295	184.17	8.6743	pos	-	-	-	-	-	0.00755315
4-Acetyl-1-methylcyclohexene	-	HMDB0033434	C9H14O	5.9652	5.9636	5.9527	6.0206	6.0016	5.8678	5.9745	5.9	6.0552	6.0098	6.0155	6.0266	5.9317	5.9975	6.0263	6.0448	5.8706	5.9957	6.1846	5.9926	5.965	6.0385	6.0253	5.9925	5.9843	5.9842	5.9869	5.9902	pos_297	metab_296	156.138	8.6743	pos	M+H, M+NH4, M+H-H2O	57.6	-	0.30516	6090-09-01	0.00648014
metab_297	-	-	-	4.8273	4.6702	4.5965	4.6627	4.7296	4.7325	4.6142	4.7249	4.8266	4.8344	4.7577	4.807	4.8627	4.8999	4.7811	4.8382	4.8907	4.834	4.7067	4.7956	4.7389	4.7577	4.768	4.7749	4.7256	4.7258	4.7256	4.7049	pos_298	metab_297	531.387	8.5025	pos	-	-	-	-	-	0.0236746
metab_298	-	-	-	4.487	4.4084	4.256	4.4277	4.3123	4.3969	4.3463	4.3018	4.5538	4.5701	4.462	4.7199	4.8324	5.0582	4.6161	4.5695	4.7575	4.6221	4.5273	4.4557	4.4879	4.7289	4.6701	4.6037	5.7107	5.8375	5.8055	5.8458	pos_299	metab_298	485.113	8.5025	pos	-	-	-	-	-	0.134407
metab_299	-	-	-	5.1918	4.9787	5.0226	5.1861	5.3402	5.021	5.1173	5.0384	5.1332	5.1942	5.5174	5.0032	5.0195	4.9722	5.0226	4.9639	4.9789	4.9785	5.0371	4.8722	4.9949	5.0415	4.99	4.9412	5.0736	5.0614	5.0735	5.0733	pos_300	metab_299	348.287	8.5025	pos	-	-	-	-	-	0.0138501
metab_300	-	-	-	6.0693	6.1378	6.0837	6.2249	6.1645	6.0149	6.1516	6.041	6.2071	6.1759	6.1473	6.1935	6.0895	6.176	6.209	6.2299	6.0276	6.185	6.3792	6.166	6.1014	6.1825	6.195	6.1651	6.1504	6.1424	6.1585	6.156	pos_301	metab_300	254.248	8.4135	pos	-	-	-	-	-	0.0163977
metab_301	-	-	-	5.2049	4.8348	5.2647	2.7855	2.9715	3.063	2.8917	4.9817	4.5955	3.9313	5.1174	3.0068	3.0055	3.0115	3.0166	4.6137	3.9854	4.6225	4.4191	5.1301	4.5777	4.4789	3.023	5.202	4.7236	4.7522	4.7304	4.7254	pos_302	metab_301	667.486	8.3477	pos	-	-	-	-	-	0.030713
metab_302	-	-	-	0.7582	4.0222	5.4754	4.4928	4.28	4.9002	4.9071	4.8733	2.5091	0.041	3.6254	0.0418	0.0417	0.0422	0.6908	0.0413	0.0426	0.0411	0.0385	0.0412	0.0434	0.0408	0.0433	0.0427	4.3908	4.4123	4.385	4.3869	pos_303	metab_302	437.324	8.3691	pos	-	-	-	-	-	0.0293848
metab_303	-	-	-	4.2039	3.9193	4.1887	3.7681	3.9888	3.8224	3.1817	4.0008	4.2037	4.2628	4.2897	3.5307	3.9649	4.5954	4.1079	4.3346	4.2213	4.2692	4.089	4.3564	4.3102	4.2365	4.0368	4.3695	4.2285	4.2896	4.2885	4.2904	pos_304	metab_303	383.299	8.3691	pos	-	-	-	-	-	0.0677614
metab_304	-	-	-	4.8924	4.6914	4.8606	4.0274	3.5733	3.9622	3.8224	4.5942	4.3366	4.248	4.7381	3.7297	4.1188	3.5909	3.8879	4.431	4.3264	4.4717	4.2576	4.6267	4.391	4.358	3.8206	4.633	4.5409	4.5069	4.5158	4.5046	pos_305	metab_304	380.209	8.3691	pos	-	-	-	-	-	0.0388603
metab_305	-	-	-	4.6063	3.6172	5.0886	3.3448	1.8211	2.5417	1.844	4.6155	3.5426	1.9727	5.2911	2.1942	2.1938	2.5449	2.6701	1.9893	2.0091	3.1688	1.6239	3.9418	2.1253	3.3327	2.1301	4.2663	4.0269	3.9917	4.003	3.9924	pos_306	metab_305	470.324	8.3477	pos	-	-	-	-	-	0.03839
6-[5]-ladderane-1-hexanol	-	LMFA05000063	C18H28O	5.6828	5.6577	5.6722	5.759	5.7322	5.5826	5.6637	5.5889	5.7957	5.727	5.7595	5.682	5.6031	5.6805	5.7333	5.7566	5.5076	5.6979	5.9141	5.6704	5.7013	5.7893	5.71	5.6698	5.7052	5.6998	5.7019	5.7069	pos_307	metab_306	261.221	8.3477	pos	M+H, M+NH4, M+H-H2O	53.2	-	-0.376257	-	0.00732824
2-(10-Heptadecenyl)-6-hydroxybenzoic acid	-	HMDB0038522	C24H38O3	2.8234	3.833	4.2056	3.9715	3.6718	4.2389	4.1564	3.9468	2.8606	3.0817	2.4855	2.2431	2.2418	4.1565	3.7804	3.6391	3.7554	3.4022	2.206	3.2655	3.5626	2.8341	3.9126	2.5896	3.6534	3.6551	3.6455	3.6474	pos_308	metab_307	407.316	8.1705	pos	M+H-H2O, M+H, M+CH3OH+H	-	51	-0.324795	111047-30-4	0.010637
metab_308	-	-	-	2.8211	1.3003	1.4003	0.8911	2.394	0.9362	1.5915	1.0414	2.953	2.3945	6.4379	1.2258	1.7571	2.7883	1.4435	1.0061	2.4252	3.3616	3.1797	3.7236	3.191	2.8423	2.8052	3.0578	5.1411	5.1413	5.1367	5.1303	pos_309	metab_308	494.335	8.1482	pos	-	-	-	-	-	0.0118571
metab_309	-	-	-	5.8288	5.0781	5.6099	5.568	5.6152	5.4952	4.9692	5.044	5.6533	5.8496	5.7478	4.9142	4.5448	4.7314	4.8345	4.6969	5.3266	4.6845	5.1462	4.6483	5.8603	5.7533	5.2191	4.8762	5.546	5.5448	5.5562	5.5463	pos_310	metab_309	427.303	8.1039	pos	-	-	-	-	-	0.0122286
metab_310	-	-	-	5.2541	3.7832	5.1277	4.2062	5.1508	4.9587	4.2207	4.5363	5.3691	4.7824	5.3779	3.5079	3.7853	3.5321	3.3124	3.2929	3.157	3.3757	3.3137	3.8569	5.2986	5.3094	4.5644	3.6615	4.9236	4.9129	4.9229	4.9252	pos_311	metab_310	201.164	8.1039	pos	-	-	-	-	-	0.01283
metab_311	-	-	-	4.4994	3.747	4.3386	3.8553	4.3632	4.2352	3.8402	3.943	4.5705	4.1642	4.5168	3.7649	3.8879	3.8862	3.8049	3.7668	3.8879	3.8178	3.7507	3.8804	4.5016	4.4671	4.0577	3.7541	4.2435	4.2428	4.2465	4.2483	pos_312	metab_311	327.268	8.1039	pos	-	-	-	-	-	0.00597019
metab_312	-	-	-	4.792	4.1386	4.9719	4.2647	4.6962	4.5222	3.8627	4.599	4.9211	4.3246	4.9036	3.2433	3.5103	3.3941	3.3869	3.3994	2.9643	3.3359	3.5142	3.6687	4.8463	4.8575	4.1927	3.3721	4.5066	4.5041	4.5038	4.5173	pos_313	metab_312	241.195	8.1039	pos	-	-	-	-	-	0.0147486
Alpha-curcumene	C09649	HMDB0059878;LMPR0103060015	C15H22	5.8372	4.6972	5.7159	4.9581	5.7431	5.5527	4.9545	5.192	5.9504	5.4037	5.9541	4.6643	4.6672	4.597	4.6115	4.6501	4.3546	4.597	4.8039	4.7893	5.8651	5.8852	5.2481	4.6687	5.527	5.5308	5.5335	5.5367	pos_314	metab_313	405.352	8.0817	pos	M+CH3OH+H, 2M+H, M+H	65.7	-	-0.468998	-	0.0094603
metab_314	-	-	-	4.013	3.389	3.5098	3.8027	4.1678	3.2705	4.0149	2.6838	3.7147	3.2482	2.7633	4.6724	4.8075	4.6671	4.688	5.1157	4.5038	5.177	5.0196	5.4297	4.7998	4.5044	5.0013	5.2367	4.6797	4.6849	4.6845	4.6337	pos_315	metab_314	478.293	8.015	pos	-	-	-	-	-	0.0554467
metab_315	-	-	-	4.4037	4.4718	4.1171	0.8406	2.3962	0.9396	0.9331	3.5113	3.9791	3.3581	3.181	4.168	4.2391	4.2122	4.2433	4.7971	4.5611	4.9706	4.9802	5.1268	4.5323	4.6515	4.5953	5.1513	4.512	4.5443	4.5465	4.5484	pos_316	metab_315	378.231	7.9036	pos	-	-	-	-	-	0.0390707
metab_316	-	-	-	4.1671	5.1564	3.563	4.152	3.7194	4.1642	5.0607	4.2451	4.0919	5.5949	3.6138	3.4445	3.5263	3.7861	3.6942	3.836	3.3946	3.4547	3.212	3.5296	3.9151	3.7512	3.9843	3.4506	4.6587	4.6592	4.6882	4.6693	pos_317	metab_316	409.346	7.859	pos	-	-	-	-	-	0.032036
metab_317	-	-	-	4.6176	4.8752	4.3265	4.5028	4.9127	4.6077	4.6664	4.5265	4.6712	4.8623	4.6475	5.0215	5.3026	5.2008	5.1688	5.0588	5.0519	4.8375	4.6399	4.8775	5.0079	5.1379	5.0386	4.8958	4.8561	4.8616	4.8561	4.8706	pos_318	metab_317	390.321	7.8368	pos	-	-	-	-	-	0.015837
metab_318	-	-	-	5.1889	5.1317	5.0651	5.3175	5.0981	5.0349	5.1491	5.0508	5.1326	5.1761	5.1258	5.0833	5.0239	5.1104	5.113	5.1456	4.9497	5.0881	5.3028	5.1188	5.0929	5.114	5.1263	5.0725	5.1075	5.1077	5.0954	5.1066	pos_319	metab_318	261.221	7.4587	pos	-	-	-	-	-	0.013616
metab_319	-	-	-	4.8392	4.8272	4.8239	4.7768	4.8392	4.7839	4.6984	4.7166	4.8419	4.85	4.9055	4.8317	4.9525	4.9463	4.9162	4.8359	4.9695	4.8861	4.8155	4.8891	4.8721	4.8915	4.8426	4.8981	4.8447	4.8449	4.8307	4.832	pos_320	metab_319	576.411	7.437	pos	-	-	-	-	-	0.0179501
metab_320	-	-	-	3.0888	3.3657	4.2843	2.8574	4.558	3.4484	4.3806	3.3181	3.7015	4.0401	3.8106	5.4118	4.0424	5.0834	5.0138	5.0221	4.3257	4.1301	3.8697	4.7616	3.8307	3.8296	4.2957	4.7199	4.5596	4.5317	4.5097	4.5111	pos_321	metab_320	573.379	7.3926	pos	-	-	-	-	-	0.0544783
Solerol	-	HMDB0002173	C6H10O4	4.1634	3.942	3.9414	4.1808	3.996	4.012	4.7724	4.236	3.9956	4.1015	4.0339	3.9877	4.0332	4.0703	4.0144	3.9912	4.0091	3.9786	3.897	3.9476	3.9503	3.9896	3.9738	3.9591	4.1054	4.0879	4.0803	4.0821	pos_322	metab_321	129.055	7.3701	pos	M+H-H2O, M+Na, M+H-2H2O	-	72.9	0.716062	27610-27-1	0.0265988
metab_322	-	-	-	4.1143	3.057	4.0949	3.2176	4.1488	3.4869	3.7	3.3339	3.7055	3.8108	3.9281	4.192	3.421	3.6085	3.5969	5.2806	4.7318	2.6446	3.7561	3.1883	3.7445	3.7681	3.2311	2.8771	4.0818	4.0781	4.09	4.0869	pos_323	metab_322	347.219	6.9702	pos	-	-	-	-	-	0.0121501
metab_323	-	-	-	4.8826	5.5999	4.6998	4.3665	5.2639	4.4379	4.8151	5.1876	4.664	4.6944	5.5897	2.1501	2.7271	2.0611	2.0662	2.0514	2.0656	2.4434	2.0195	2.0799	2.6146	2.7562	2.6826	2.0658	4.8398	4.8439	4.8397	4.8553	pos_324	metab_323	294.279	6.9032	pos	-	-	-	-	-	0.0170939
metab_324	-	-	-	5.9819	4.2319	4.88	5.9332	4.5697	5.679	5.833	5.7863	4.9511	5.2269	5.0074	3.7947	4.0053	4.7564	4.3477	4.3999	4.1545	3.9064	3.4085	4.3549	4.8051	4.6716	4.4872	4.0379	5.4054	5.4015	5.4012	5.4072	pos_325	metab_324	409.346	6.9256	pos	-	-	-	-	-	0.00677153
metab_325	-	-	-	5.7519	5.6188	5.5219	5.5342	5.6264	5.6672	5.502	5.6844	5.6854	5.7574	5.6283	4.3853	4.9399	4.8406	4.8396	4.8912	4.4253	4.404	3.8672	4.5912	4.7045	4.8338	4.6275	4.3618	5.4211	5.4151	5.3949	5.4095	pos_326	metab_325	515.263	6.881	pos	-	-	-	-	-	0.0256283
metab_326	-	-	-	4.8454	3.9074	4.661	4.3247	4.9036	4.4041	4.0565	4.3109	4.7251	4.5424	4.7462	4.2001	4.5051	4.7785	4.6044	4.4597	4.3864	4.3818	4.2746	4.484	4.8634	4.8262	4.6946	4.3907	4.515	4.5153	4.5337	4.5179	pos_327	metab_326	381.315	6.5468	pos	-	-	-	-	-	0.0206918
metab_327	-	-	-	6.1137	5.0734	6.1918	6.3749	6.5609	6.0263	6.2239	6.0253	5.6764	6.4208	5.8338	6.023	5.7024	6.5691	6.4443	5.7967	5.7632	6.0876	6.4583	5.8621	5.8479	5.863	6.0652	5.8118	6.156	6.154	6.1552	6.1577	pos_328	metab_327	355.263	6.5468	pos	-	-	-	-	-	0.00352869
metab_328	-	-	-	4.3626	3.2968	4.4373	4.5146	4.7519	4.1963	4.3419	4.1659	4.1505	4.5619	4.2154	4.1804	3.8161	4.7537	4.5922	4.0101	3.975	4.2582	4.5824	4.079	4.2791	4.219	4.2831	4.0448	4.3344	4.3446	4.3482	4.3501	pos_329	metab_328	261.185	6.5468	pos	-	-	-	-	-	0.0160217
metab_329	-	-	-	4.7005	3.5408	4.5818	4.4573	4.8821	4.3594	4.362	4.2164	4.5662	4.5479	4.659	4.2636	4.3601	4.7785	4.6293	4.3868	4.3688	4.3969	4.4506	4.3634	4.6839	4.6233	4.5609	4.2625	4.5308	4.4901	4.5306	4.5324	pos_330	metab_329	255.211	6.5468	pos	-	-	-	-	-	0.0462746
metab_330	-	-	-	5.1229	4.0943	4.8987	4.8994	5.1165	4.8784	4.921	4.8006	4.9948	4.9375	5.0553	4.5433	4.6426	4.9765	4.8455	4.6573	4.5637	4.6164	4.6241	4.6153	5.0195	4.9871	4.7856	4.5365	4.8728	4.8647	4.8687	4.8745	pos_331	metab_330	215.179	6.5468	pos	-	-	-	-	-	0.0100618
metab_331	-	-	-	4.7267	3.7381	4.6687	4.6434	4.9582	4.4578	4.5207	4.418	4.5284	4.686	4.6388	4.3737	4.3307	4.8769	4.7232	4.3495	4.2679	4.4437	4.6577	4.3766	4.6602	4.6333	4.521	4.3262	4.5835	4.5755	4.5774	4.5778	pos_332	metab_331	213.164	6.5468	pos	-	-	-	-	-	0.00801617
13-tetradecen-2,4-diyn-1-ol	-	LMFA05000016	C14H20O	4.8129	3.9343	4.6688	4.5563	4.9637	4.4832	4.4664	4.4109	4.7025	4.6577	4.7728	4.4031	4.5404	4.7833	4.6736	4.5296	4.3977	4.4783	4.4951	4.4871	4.7806	4.7611	4.6097	4.414	4.6063	4.6066	4.6062	4.6028	pos_333	metab_332	205.159	6.5468	pos	M+H-H2O, M+Na, M+H	67.1	-	0.00459976	-	0.00408919
metab_333	-	-	-	4.41	3.7116	4.4271	4.477	4.7231	4.2642	4.3839	4.2751	4.2704	4.5723	4.3107	4.24	4.1601	4.7313	4.5414	4.1411	4.126	4.2734	4.5218	4.1802	4.3652	4.3324	4.3524	4.0818	4.363	4.365	4.3647	4.3587	pos_334	metab_333	199.148	6.5468	pos	-	-	-	-	-	0.00663019
Camelledionol	-	HMDB0035730	C29H44O3	5.061	2.8673	4.5563	4.6106	3.2944	4.4793	3.9443	4.4793	3.9251	3.3373	3.6138	2.424	2.5796	3.4936	2.4337	2.7195	3.2008	3.1081	2.3868	2.928	2.9897	2.4783	3.6068	2.4333	4.0586	4.0641	4.0219	4.0656	pos_335	metab_334	423.326	6.4797	pos	M+H-H2O, M+H, M+H-2H2O	-	64.2	0.0369702	81426-90-6	0.0464771
metab_335	-	-	-	4.0443	3.4421	3.9103	4.3318	4.3769	3.8615	3.5738	4.0673	4.4009	4.1536	3.7198	3.1648	3.4026	3.7539	3.2928	2.2902	3.7689	3.7696	3.7451	3.9685	4.5128	4.2364	4.6176	4.1459	3.9058	3.8891	3.9053	3.9309	pos_336	metab_335	387.214	6.4797	pos	-	-	-	-	-	0.0400328
metab_336	-	-	-	5.4007	5.4718	5.2561	5.4278	5.6167	5.2945	5.5321	5.3027	5.6037	5.3882	5.3658	5.5067	5.8923	5.9918	6.2802	6.2712	5.479	6.3214	6.5096	5.4978	6.3501	6.3957	6.0209	5.3307	5.9012	5.9014	5.9037	5.9081	pos_337	metab_336	302.305	6.4134	pos	-	-	-	-	-	0.00742542
metab_337	-	-	-	4.5819	4.5304	4.9912	3.948	4.5252	3.6145	4.1542	4.0743	4.2302	4.8995	4.0422	5.1841	4.3227	4.9045	4.7055	5.0442	4.1997	4.6787	4.0851	4.533	4.3835	3.9302	4.152	4.8439	4.5849	4.5432	4.5206	4.5219	pos_338	metab_337	635.379	6.193	pos	-	-	-	-	-	0.0706742
metab_338	-	-	-	5.1469	4.2508	4.9939	4.5908	5.2348	4.9139	4.4223	4.6283	4.9303	4.6597	5.0493	5.0508	5.2891	5.2508	5.2217	5.2106	5.0964	5.1501	4.8978	5.1171	5.0825	5.0659	5.1832	5.1471	5.043	5.0477	5.0473	5.0487	pos_339	metab_338	411.362	6.1261	pos	-	-	-	-	-	0.00580104
metab_339	-	-	-	4.5185	3.9245	4.3633	4.4755	4.0635	4.1954	4.0169	4.0859	4.3755	4.4132	3.8797	3.2095	3.1349	2.7643	2.658	2.5808	2.934	3.8811	4.3108	4.5404	4.4577	4.594	4.5626	4.4227	4.1782	4.1895	4.1917	4.1869	pos_340	metab_339	517.35	6.1704	pos	-	-	-	-	-	0.0136088
3-Oxocholic acid	-	LMST04010443;HMDB0000502	C24H38O5	4.7486	4.3623	4.6854	4.8414	5.4619	4.6864	5.2626	5.0082	4.483	5.0216	4.8963	4.0567	3.9342	4.4705	4.8564	3.8606	3.5148	3.921	5.0713	4.1278	4.0672	4.1795	4.3487	3.683	4.7797	4.7754	4.7796	4.7597	pos_341	metab_340	371.258	6.1704	pos	M+H-2H2O, M+Na, M+NH4	-	74.3	-0.228499	2304-89-4	0.0216548
metab_341	-	-	-	5.2862	3.1604	5.2162	4.352	5.0371	5.0019	4.0355	4.6562	5.1444	4.7255	5.1994	4.5292	4.7872	4.7842	4.7483	4.7309	4.6149	4.6747	4.4432	4.6984	5.2686	5.2545	4.7679	4.7139	4.9368	4.9339	4.9335	4.9353	pos_342	metab_341	381.315	6.1261	pos	-	-	-	-	-	0.00351412
metab_342	-	-	-	5.1862	2.6	5.1543	3.7941	4.7294	4.9514	3.2631	4.5782	4.9637	4.5144	5.175	2.6831	2.6817	2.6877	2.6928	2.6779	2.6922	2.6758	2.6457	2.676	5.1161	5.1096	2.6992	2.6923	4.6401	4.6085	4.6114	4.6097	pos_343	metab_342	571.4	6.1037	pos	-	-	-	-	-	0.0355245
metab_343	-	-	-	6.5063	4.618	6.4599	5.5955	6.1489	6.2833	5.4849	6.02	6.3949	5.8577	6.4846	5.2625	5.5976	5.4753	5.4547	5.4654	5.2843	5.4224	5.1606	5.3434	6.538	6.5462	5.5538	5.4191	6.0878	6.088	6.0841	6.08	pos_344	metab_343	439.357	6.1037	pos	-	-	-	-	-	0.00866546
metab_344	-	-	-	3.8399	2.2335	3.5303	2.0961	4.4349	3.0283	2.2424	2.1884	3.2348	3.6628	3.7888	4.67	4.9267	4.8809	4.8351	4.8191	4.6964	4.7945	4.5193	4.714	3.8118	3.6427	4.7084	4.7596	4.4723	4.4703	4.4673	4.474	pos_345	metab_344	323.097	5.9919	pos	-	-	-	-	-	0.00663228
metab_345	-	-	-	5.81	3.035	5.4919	4.8165	6.2633	5.0881	4.5148	4.3673	5.1567	5.722	5.7705	6.3681	6.6808	6.6667	6.6434	6.5983	6.5336	6.5398	6.2407	6.4942	5.7508	5.5529	6.4178	6.4774	6.2341	6.2351	6.2132	6.2141	pos_346	metab_345	965.508	5.9696	pos	-	-	-	-	-	0.0278344
metab_346	-	-	-	5.9561	5.9546	5.7221	5.9321	5.9585	5.9196	5.8893	5.9132	5.9992	6.0516	6.0175	4.8349	5.4003	5.2169	5.224	5.3092	4.9651	4.887	4.4747	4.9799	4.9327	5.1713	5.0343	4.822	5.8295	5.8383	5.8264	5.8282	pos_347	metab_346	531.258	5.8811	pos	-	-	-	-	-	0.0122147
metab_347	-	-	-	4.4676	4.4002	4.3135	4.321	4.4587	4.3968	4.3568	4.3224	4.5251	4.4978	4.461	3.4161	4.2617	4.2733	4.3697	4.1714	3.8376	4.2592	3.9933	4.1678	3.9493	4.0133	3.7531	4.1937	4.3114	4.3156	4.2846	4.3199	pos_348	metab_347	389.243	5.8811	pos	-	-	-	-	-	0.0360444
metab_348	-	-	-	5.4608	5.2489	5.3402	5.4177	5.5232	5.3437	5.5289	5.4144	5.392	5.3694	5.4224	5.5328	5.5008	5.4799	5.4699	5.8574	5.639	5.5723	5.7305	5.3227	5.488	5.5863	5.6375	5.4726	5.687	5.6887	5.6869	5.7095	pos_349	metab_348	376.259	5.8811	pos	-	-	-	-	-	0.0257113
metab_349	-	-	-	4.6332	4.5745	4.4195	4.6613	4.5977	4.4882	4.5296	4.4525	4.5822	4.4361	4.5704	4.1682	4.4172	4.497	4.4674	4.28	4.2034	4.3159	4.1936	4.7079	4.5409	4.7125	4.4707	4.6056	4.4866	4.5222	4.5097	4.5232	pos_350	metab_349	397.303	5.8364	pos	-	-	-	-	-	0.0387191
metab_350	-	-	-	4.7853	4.5621	4.5396	4.8675	4.7855	4.5844	4.5719	4.7353	4.7249	4.0395	4.7778	4.194	4.4366	4.6224	4.5436	4.3667	4.127	4.4964	4.4018	4.9341	4.6212	4.8156	4.6403	4.572	4.6195	4.626	4.6194	4.6275	pos_351	metab_350	363.3	5.8364	pos	-	-	-	-	-	0.0098024
metab_351	-	-	-	3.8582	3.7077	3.6662	4.0825	4.6083	4.4456	4.1912	4.3772	4.4267	4.634	3.9809	3.5528	4.0653	4.1415	4.0731	3.3607	3.5718	3.9426	3.7649	3.7774	3.9999	4.264	4.3798	4.1333	4.1207	4.1235	4.1261	4.1206	pos_352	metab_351	301.18	5.8142	pos	-	-	-	-	-	0.00604264
metab_352	-	-	-	5.8238	5.7839	5.6317	5.8296	5.8627	5.8387	5.7719	5.8146	5.8709	5.9209	5.9058	4.4797	4.9515	4.8649	4.8163	4.9772	4.4961	4.5114	3.9096	4.5536	4.5958	4.8122	4.6406	4.3618	5.6418	5.6741	5.6512	5.6433	pos_353	metab_352	570.269	5.7916	pos	-	-	-	-	-	0.034819
metab_353	-	-	-	5.2104	5.1555	5.0551	5.0171	5.268	5.116	5.1672	5.0264	5.2484	5.2415	5.2264	5.6781	5.7774	5.719	5.5822	5.6834	5.603	5.588	5.3911	5.5875	5.6473	5.7228	5.5385	5.6075	5.4233	5.4289	5.4333	5.4376	pos_354	metab_353	279.232	5.7693	pos	-	-	-	-	-	0.0140612
metab_354	-	-	-	4.5219	4.4268	4.3823	4.3877	4.3862	4.3905	4.3987	4.3663	4.5369	4.3288	4.5297	4.4684	4.508	4.4699	4.49	4.4864	4.4555	4.451	4.5698	4.4937	4.4571	4.2602	4.4629	4.4831	4.4294	4.4324	4.4321	4.425	pos_355	metab_354	147.065	5.7036	pos	-	-	-	-	-	0.00789226
metab_355	-	-	-	5.4405	5.717	5.6205	5.2152	5.3019	5.0692	4.8651	5.3715	5.3668	5.3355	5.5175	4.9442	5.6408	5.4607	5.8207	5.4553	5.2992	5.6586	5.3608	5.4423	5.6447	5.4858	5.3732	5.6507	5.4581	5.4316	5.4313	5.4331	pos_356	metab_355	492.27	5.6165	pos	-	-	-	-	-	0.0304758
metab_356	-	-	-	5.0797	5.239	4.9723	4.9821	5.1837	4.9407	5.04	4.9042	5.0678	5.2868	5.0409	4.2073	4.4478	4.2617	4.0261	4.2894	4.3469	4.4453	4.1542	4.1629	4.5501	4.3916	4.3564	4.3369	4.848	4.8627	4.8624	4.8618	pos_357	metab_356	417.192	5.2828	pos	-	-	-	-	-	0.0164173
metab_357	-	-	-	4.6936	3.8202	4.4614	4.1756	4.7932	4.5991	4.5556	4.3824	4.6819	4.3327	4.7441	5.4502	5.4758	5.4857	5.2714	5.4371	5.2727	5.3021	5.136	5.3154	5.3412	5.4373	5.1704	5.3091	5.076	5.0813	5.0717	5.0736	pos_358	metab_357	442.28	5.4387	pos	-	-	-	-	-	0.00950656
metab_358	-	-	-	5.2455	5.0577	5.119	5.2089	5.2368	5.2318	5.2655	5.1375	5.3506	5.1877	5.2328	5.3234	5.3977	5.3782	5.3628	5.3069	5.3952	5.3942	5.4475	5.3164	5.3142	5.4049	5.3649	5.3014	5.2704	5.2962	5.2969	5.2985	pos_359	metab_358	250.178	5.4387	pos	-	-	-	-	-	0.030446
Acetylpterosin C	-	HMDB0030764	C16H20O4	3.8792	3.5683	3.8585	3.9902	4.3066	4.3353	4.3895	4.3763	4.7671	4.3836	4.0854	3.9761	3.8981	4.3252	4.1772	3.9571	4.1991	4.2266	4.0827	4.2167	4.2291	4.1793	4.504	4.1214	4.2269	4.237	4.2285	4.2324	pos_360	metab_359	299.125	5.3272	pos	M+H-2H2O, M+H, M+Na	64.5	-	0.132519	-	0.0104795
metab_360	-	-	-	5.1003	5.1959	4.8071	4.7658	5.1736	5.1297	5.1252	5.0476	5.3535	5.1588	5.0953	4.7824	4.986	4.9652	4.9032	4.7588	4.9609	4.9796	4.9221	5.0271	5.1871	5.3077	5.2457	5.2545	5.0444	5.0763	5.076	5.0777	pos_361	metab_360	365.316	5.3941	pos	-	-	-	-	-	0.0364931
metab_361	-	-	-	2.8981	4.1086	5.0324	4.7722	4.4733	4.9888	4.5352	4.4683	3.6639	3.1686	3.5552	2.1658	2.1644	3.4372	2.6078	2.1946	3.3666	2.5992	2.6758	2.3786	2.5028	3.305	3.5036	2.8957	4.2677	4.2137	4.2134	4.2279	pos_362	metab_361	361.164	5.1491	pos	-	-	-	-	-	0.0603185
metab_362	-	-	-	5.4388	5.3799	5.1577	5.5185	5.5097	5.5009	5.5351	5.4275	5.5892	5.5545	5.6392	4.3938	4.7991	4.6516	4.627	4.7649	4.2905	4.2658	3.7331	4.3736	4.4224	4.6319	4.4576	4.1697	5.3356	5.3668	5.3355	5.344	pos_363	metab_362	547.253	5.0821	pos	-	-	-	-	-	0.0344803
metab_363	-	-	-	2.4975	2.2006	2.2751	2.2886	2.7375	2.259	2.1687	2.1555	2.2751	2.2746	2.3687	2.3565	2.4628	5.4534	4.1317	2.4883	5.3768	2.8682	2.2461	2.2763	2.3848	2.2725	3.1934	2.3796	4.1012	4.1053	4.0951	4.1068	pos_364	metab_363	505.205	5.0821	pos	-	-	-	-	-	0.0119833
metab_364	-	-	-	4.6369	4.6706	4.4203	4.3792	4.6151	4.5329	4.6594	4.5546	4.7326	4.5945	4.6147	4.4255	4.7299	4.6408	4.587	4.6855	4.5997	4.6561	4.4042	4.6874	4.7794	4.7778	4.745	4.7048	4.5899	4.618	4.6119	4.6195	pos_365	metab_364	439.315	5.0821	pos	-	-	-	-	-	0.0311494
metab_365	-	-	-	4.7461	4.8185	4.6673	4.4406	4.6206	4.5141	4.5519	4.5722	4.6667	4.8283	4.6485	3.7125	3.6818	3.6104	3.7541	3.8178	3.8765	3.7798	3.7995	3.7596	3.9896	3.7831	4.0457	3.8379	4.3899	4.3865	4.3862	4.4011	pos_366	metab_365	303.159	4.993	pos	-	-	-	-	-	0.0161993
C16:4n-2,5,9,12	-	LMFA01030164	C16H24O2	5.1645	4.5719	5.1122	4.6335	5.0091	4.8923	4.6273	4.7522	5.0739	4.7772	5.0708	4.7283	4.8488	4.8802	4.8911	4.8446	4.8041	4.8775	4.7101	4.858	5.0832	5.0061	4.9335	4.8895	4.8984	4.8803	4.904	4.9108	pos_367	metab_366	249.185	4.993	pos	M+H-H2O, M+H, M+H-2H2O	52.2	-	-0.134298	-	0.0298242
metab_367	-	-	-	4.6732	3.7905	4.9979	3.8335	4.7155	4.3989	4.4415	4.44	4.9579	4.0112	4.76	5.1457	5.2994	5.257	5.12	5.3002	5.1523	5.2616	5.0831	5.1597	5.1803	5.1717	4.8153	5.2596	4.9366	4.9102	4.9079	4.91	pos_368	metab_367	442.28	4.9262	pos	-	-	-	-	-	0.0319228
metab_368	-	-	-	5.2132	5.3933	4.9063	5.2103	5.0347	4.7853	4.871	5.0549	5.247	5.0188	5.0941	3.4684	3.9962	3.6984	3.249	2.8601	3.34	4.8407	4.4161	4.9638	5.1384	5.0421	4.7902	4.7969	4.927	4.9273	4.9268	4.9482	pos_369	metab_368	403.178	4.9262	pos	-	-	-	-	-	0.0246984
metab_369	-	-	-	3.9361	3.1644	3.7717	4.2755	4.1641	4.3448	4.321	4.2161	4.6385	4.3346	3.6918	4.3994	3.9536	3.8242	3.6096	4.0079	4.1384	3.8616	4.4137	4.1903	4.1352	4.2456	4.4561	4.2633	4.1162	4.1086	4.1133	4.1101	pos_370	metab_369	426.194	4.6149	pos	-	-	-	-	-	0.00787651
metab_370	-	-	-	4.7288	4.7991	4.6405	4.1812	4.6494	4.5005	4.5034	4.7044	4.6757	4.4727	4.6553	4.1144	4.5582	4.4967	4.7908	5.0105	4.4045	4.9354	4.9319	5.0018	5.0095	4.9374	4.9792	4.9636	4.7788	4.7229	4.7228	4.7245	pos_371	metab_370	510.221	4.8371	pos	-	-	-	-	-	0.0658055
metab_371	-	-	-	4.9046	4.945	4.8299	4.9223	5.1227	4.7523	5.0649	4.7336	5.105	4.7792	4.8734	4.9705	5.1896	5.3581	5.6997	5.6116	4.8993	5.7305	6.0413	4.8358	5.8705	5.8757	5.3536	4.9317	5.3118	5.3109	5.3045	5.3185	pos_372	metab_371	246.243	4.7261	pos	-	-	-	-	-	0.0132389
metab_372	-	-	-	4.5461	4.1242	4.6707	4.3133	4.4896	4.458	4.2498	4.044	4.3448	4.7229	4.4648	4.4611	4.4248	4.4942	4.3507	4.4017	4.3967	4.2204	4.2652	4.1737	4.4237	4.3788	4.3368	4.2593	4.367	4.3673	4.367	4.3211	pos_373	metab_372	360.156	1.7029	pos	-	-	-	-	-	0.0515157
metab_373	-	-	-	4.5037	3.8087	4.1847	4.1936	4.383	4.2908	4.789	4.0237	4.6707	4.5988	3.9425	4.7008	4.2519	3.9606	4.466	4.3352	3.8838	4.88	5.4231	5.3119	5.1599	5.303	5.294	5.4158	4.8333	4.8305	4.83	4.8525	pos_374	metab_373	232.097	1.8067	pos	-	-	-	-	-	0.0250001
metab_374	-	-	-	5.2646	5.3102	5.1485	5.0446	5.194	5.0701	5.0707	5.1443	5.1519	5.2979	5.2545	5.0729	5.2391	5.1301	5.312	5.3441	5.2204	5.3764	5.4544	5.4167	5.4641	5.2866	5.3774	5.4823	5.2703	5.2685	5.2455	5.2721	pos_375	metab_374	305.171	1.825	pos	-	-	-	-	-	0.0283217
metab_375	-	-	-	5.2798	5.3472	5.2104	5.0345	5.2415	5.1079	5.1714	5.1749	5.23	5.2528	5.2925	5.1571	5.2126	5.1787	5.3816	5.3995	5.1575	5.4749	5.5305	5.4917	5.5182	5.4174	5.4279	5.5277	5.3129	5.3132	5.3174	5.334	pos_376	metab_375	259.165	1.825	pos	-	-	-	-	-	0.0232066
metab_376	-	-	-	4.6726	4.6199	4.5649	4.1709	4.4054	4.4693	4.4898	4.4519	4.5849	4.6173	4.5758	4.9341	4.9318	4.8743	4.8773	4.8615	4.9478	4.8764	4.8179	4.7773	4.9867	4.7855	4.8847	4.845	4.7365	4.7368	4.7584	4.7429	pos_377	metab_376	205.134	1.3519	pos	-	-	-	-	-	0.023924
metab_377	-	-	-	4.2349	4.0676	4.1782	4.0041	4.2041	4.1526	4.0953	4.1464	4.2472	4.2495	4.1729	4.3213	4.2442	4.3293	4.3461	4.2748	4.2918	4.2138	4.2733	4.2311	4.2653	4.2516	4.3225	4.3214	4.2113	4.1954	4.1977	4.2042	pos_378	metab_377	81.0341	1.3519	pos	-	-	-	-	-	0.016562
metab_378	-	-	-	4.7877	5.1908	4.7511	4.4982	4.9406	4.9222	5.0349	4.8342	5.1294	4.9524	5.027	5.0807	4.8984	4.9942	4.8441	4.7867	4.9929	4.8505	5.0042	4.8929	4.8759	4.8595	4.9852	4.8451	4.9119	4.916	4.9295	4.9119	pos_379	metab_378	285.156	1.3101	pos	-	-	-	-	-	0.01938
metab_379	-	-	-	3.8905	3.7971	3.6284	3.5097	4.1939	4.0587	4.2183	4.0929	3.972	4.1197	3.887	4.2412	4.5214	4.565	4.5921	4.1378	4.1373	4.0715	3.8716	3.9873	4.0809	4.0608	3.9649	4.0564	4.1083	4.1147	4.1145	4.0705	pos_380	metab_379	234.076	1.8672	pos	-	-	-	-	-	0.047781
metab_380	-	-	-	5.7634	5.8137	5.7156	5.5629	5.6676	5.6483	5.5838	5.5922	5.7144	5.8286	5.7497	5.3388	5.3285	5.1638	5.2495	5.0786	5.2913	5.3193	5.3182	5.1852	5.4049	5.4044	5.3489	5.2465	5.5666	5.5709	5.5522	5.5724	pos_381	metab_380	310.147	1.8889	pos	-	-	-	-	-	0.0210337
metab_381	-	-	-	4.5046	4.5496	4.5195	4.2032	4.5629	4.4393	4.4472	4.4795	4.5163	4.5959	4.4989	4.9787	4.9168	4.9634	4.9187	4.9122	4.9395	4.9551	4.941	4.9425	4.9747	4.8811	4.9592	4.9856	4.7565	4.7567	4.7436	4.7557	pos_382	metab_381	395.229	1.8889	pos	-	-	-	-	-	0.0145362
metab_382	-	-	-	3.7153	3.6372	3.6227	3.4281	3.7265	3.7453	3.6295	3.2121	3.6802	3.8238	3.6059	4.3342	4.3707	4.3908	4.3439	4.331	4.4541	4.3861	4.2544	4.2575	4.388	4.1878	4.4329	4.2697	4.1089	4.2045	4.1732	4.1634	pos_383	metab_382	225.142	1.9111	pos	-	-	-	-	-	0.0899392
metab_383	-	-	-	4.9133	4.8831	4.7583	4.0296	4.8685	4.8115	4.8162	4.7924	4.9786	4.9683	4.764	4.8317	4.7573	4.7502	4.7536	4.7524	4.8153	4.8151	4.9483	4.9664	4.9607	4.9631	5.0166	5.0784	4.8347	4.8367	4.8363	4.8284	pos_384	metab_383	379.198	1.9111	pos	-	-	-	-	-	0.00879904
metab_384	-	-	-	4.9763	4.9384	4.8247	4.743	4.9156	4.79	3.8265	4.8413	4.8398	5.073	4.8855	4.1037	4.2608	4.3165	4.3386	4.1099	4.031	4.3096	3.9043	4.0736	4.2761	4.0398	4.2115	4.1247	4.5764	4.5767	4.5679	4.5698	pos_385	metab_384	417.118	1.9111	pos	-	-	-	-	-	0.0103901
metab_385	-	-	-	5.9121	5.883	5.8309	5.6428	5.993	6.3539	6.1504	5.9542	5.9851	6.0081	6.308	6.0799	6.0751	6.0319	6.1015	6.0955	6.1393	6.1959	6.2254	6.2722	6.1947	6.1495	6.1762	6.2384	6.0923	6.0926	6.0965	6.1045	pos_386	metab_385	213.124	1.9318	pos	-	-	-	-	-	0.0131745
metab_386	-	-	-	3.5625	3.9921	3.7519	4.2207	5.5278	6.247	5.8856	5.1682	4.7707	5.4804	6.162	4.703	5.2393	5.2103	5.2428	4.7218	5.2705	4.9832	4.5361	5.117	4.2317	4.0621	4.8125	4.4314	5.4432	5.4463	5.4331	5.3668	pos_387	metab_386	578.28	1.9318	pos	-	-	-	-	-	0.0828218
3,4,5-trihydroxy-6-(2-oxo-1,2-diphenylethoxy)oxane-2-carboxylic acid	-	HMDB0135189	C20H20O8	5.0997	5.0663	4.9299	4.7758	4.9944	4.8429	2.7158	4.9346	4.9555	5.1651	4.9394	4.5453	4.4589	4.4142	4.4927	4.4429	4.317	4.5343	4.3512	4.2641	4.375	4.3774	4.455	4.2939	4.6959	4.7014	4.6901	4.692	pos_388	metab_387	389.123	1.9111	pos	M+H-H2O, M+H, M+H-2H2O	-	52.7	0.746477	-	0.0114698
metab_388	-	-	-	4.9292	4.821	5.1427	4.5857	4.7719	4.6295	4.7555	4.7023	4.9557	4.8322	4.7646	5.3104	4.8887	5.1521	5.0452	4.866	5.0889	5.1275	5.3746	5.3824	5.2238	5.3812	5.5549	5.5838	5.1027	5.1029	5.1122	5.1044	pos_389	metab_388	307.176	1.9111	pos	-	-	-	-	-	0.0104179
metab_389	-	-	-	4.1767	4.3148	4.1351	3.932	4.1737	4.0314	4.1417	4.12	4.2477	4.2714	4.0562	4.5558	4.5772	4.4468	4.4783	4.5154	4.5877	4.5777	4.5777	4.4827	4.6356	4.5874	4.6126	4.5391	4.4047	4.405	4.4048	4.4497	pos_390	metab_389	271.144	1.9763	pos	-	-	-	-	-	0.0529665
metab_390	-	-	-	4.8963	4.786	5.0031	4.4527	4.584	4.5071	4.5509	5.0377	4.6844	4.7615	4.6459	4.8327	4.8225	4.7762	4.8042	4.8579	4.8792	4.8966	4.874	4.7574	4.9164	4.7965	4.8388	4.8588	4.7895	4.7964	4.8201	4.7913	pos_391	metab_390	345.145	1.9763	pos	-	-	-	-	-	0.0330891
metab_391	-	-	-	5.6088	5.6833	5.5437	5.3219	5.6593	5.64	5.5647	5.4741	5.6814	5.7609	5.6022	5.8088	5.7729	5.7738	5.7676	5.7679	5.7903	5.694	5.7308	5.6663	5.7333	5.734	5.7782	5.7485	5.676	5.6784	5.6806	5.6825	pos_392	metab_391	134.097	1.9763	pos	-	-	-	-	-	0.00646804
metab_392	-	-	-	3.9706	4.1589	3.7185	3.855	3.8904	3.8473	4.0863	3.7191	4.0836	4.1986	4.0616	4.2709	4.1513	3.7214	3.7722	4.2138	4.2049	4.2048	4.2254	4.1138	4.304	4.1842	4.2735	4.2333	4.0341	4.0929	4.095	4.0823	pos_393	metab_392	192.088	1.9111	pos	-	-	-	-	-	0.063685
metab_393	-	-	-	5.0427	5.0898	4.6996	4.5994	5.0024	4.9185	4.8723	5.0301	5.0861	4.9266	5.0726	5.0212	5.035	5.0325	5.0387	5.0176	5.0111	5.044	5.3509	4.9918	5.0618	4.9639	5.015	5.1444	4.9685	4.9688	4.9642	4.9631	pos_394	metab_393	339.155	2.02	pos	-	-	-	-	-	0.00673545
metab_394	-	-	-	4.2183	3.8571	3.7308	3.6779	4.2789	4.1185	4.2865	4.2021	4.095	4.3567	4.141	5.1382	4.1501	4.2953	4.0488	4.1945	4.4409	4.4242	4.8156	4.7792	4.3001	4.1825	4.5855	4.0569	4.3509	4.3656	4.3481	4.3367	pos_395	metab_394	457.182	2.02	pos	-	-	-	-	-	0.0274742
metab_395	-	-	-	4.8949	4.9282	4.9683	4.6607	4.983	4.8137	4.8204	4.8767	4.9562	4.9355	4.8704	5.1564	5.2037	5.0973	5.1259	5.1769	5.1871	5.2062	5.0849	5.1323	5.179	5.0995	5.1242	5.1379	5.0422	5.0394	5.0454	5.0393	pos_396	metab_395	388.187	2.02	pos	-	-	-	-	-	0.00662758
metab_396	-	-	-	4.705	4.7671	4.6243	4.5211	4.7398	4.6216	4.6345	4.6578	4.7804	4.8054	4.6515	4.815	4.7161	4.7072	4.7126	4.681	4.7465	4.6485	4.7248	4.5964	4.6341	4.6766	4.7341	4.6142	4.6467	4.6426	4.6694	4.6442	pos_397	metab_396	195.077	1.331	pos	-	-	-	-	-	0.0293416
metab_397	-	-	-	4.6556	4.4794	4.5937	4.2038	4.4737	4.326	4.4534	4.3735	4.5146	4.5359	4.3988	4.6853	4.6118	4.5941	4.6067	4.5507	4.7054	4.5129	4.6205	4.5557	4.572	4.5494	4.5916	4.5515	4.5151	4.5303	4.5264	4.5317	pos_398	metab_397	167.082	1.331	pos	-	-	-	-	-	0.017163
metab_398	-	-	-	4.7297	4.8436	4.7764	4.5503	4.6426	4.5946	4.8706	4.7291	4.8165	4.6754	4.6203	5.0062	4.8437	4.885	4.8179	5.0224	4.9151	4.8584	4.9964	4.9753	4.865	5.0457	4.9675	5.0717	4.8083	4.8217	4.8205	4.8271	pos_399	metab_398	177.102	1.331	pos	-	-	-	-	-	0.0181949
metab_399	-	-	-	5.1385	5.1861	5.0274	4.8508	5.1031	4.9951	5.1866	5.0276	5.2025	5.152	5.1257	5.5806	5.6098	5.4792	5.4949	5.5062	5.3926	5.5099	5.4987	5.5609	5.5988	5.4748	5.5995	5.6751	5.3382	5.3842	5.3839	5.3852	pos_400	metab_399	156.077	1.331	pos	-	-	-	-	-	0.051837
metab_400	-	-	-	4.2636	4.1234	4.0337	4.0558	4.1289	4.1556	4.0634	4.0952	4.1636	4.2062	4.0832	4.5774	4.6225	4.6688	4.7301	4.6319	4.6694	4.5446	4.5822	4.4731	4.6484	4.6354	4.627	4.5721	4.4003	4.4072	4.4133	4.415	pos_401	metab_400	145.05	1.331	pos	-	-	-	-	-	0.015359
metab_401	-	-	-	4.1431	4.1396	4.144	3.8715	4.053	4.1211	4.2456	4.1262	4.1514	4.1386	4.1042	4.6397	4.5605	4.566	4.5633	4.5514	4.6199	4.5537	4.5296	4.4	4.5031	4.4896	4.507	4.5216	4.351	4.3686	4.3802	4.3574	pos_402	metab_401	265.13	1.3101	pos	-	-	-	-	-	0.029679
metab_402	-	-	-	4.5072	4.4767	4.4733	4.3556	4.5081	4.4332	4.6378	4.5494	4.6035	4.5454	4.7275	4.8734	4.6935	4.6933	4.6726	4.6472	4.7947	4.6588	4.7055	4.6854	4.7003	4.6367	4.7521	4.6369	4.6193	4.6198	4.6323	4.6218	pos_403	metab_402	136.062	1.3101	pos	-	-	-	-	-	0.0140989
metab_403	-	-	-	4.7819	4.7681	4.7507	4.3602	4.8588	4.6973	4.7481	4.7538	4.878	4.8557	4.7477	5.1451	5.1198	5.1735	5.089	5.0874	5.0886	5.0067	5.0676	5.0723	5.125	5.0219	5.0556	5.0741	4.9088	4.9091	4.903	4.9047	pos_404	metab_403	195.077	0.6464	pos	-	-	-	-	-	0.00697284
metab_404	-	-	-	5.1568	5.1187	4.9719	4.7912	5.1534	5.048	5.0049	5.0717	5.1492	5.0699	5.0739	5.4036	5.3957	5.3754	5.3289	5.359	5.4622	5.3734	5.2342	5.2703	5.3458	5.2214	5.3298	5.2744	5.2007	5.2112	5.2081	5.2127	pos_405	metab_404	246.134	0.6464	pos	-	-	-	-	-	0.0123288
metab_405	-	-	-	5.1667	4.9396	5.3483	4.4072	4.8964	4.6764	4.5847	4.7284	4.7041	4.9887	4.8413	5.3833	5.4114	5.1869	5.1352	5.2915	5.3247	5.1847	5.1452	5.1307	5.1188	5.1524	5.2055	5.2195	5.0636	5.0555	5.0715	5.0712	pos_406	metab_405	333.166	0.6464	pos	-	-	-	-	-	0.0174196
metab_406	-	-	-	4.9068	4.6686	4.7456	4.771	4.7969	4.7551	5.4308	5.3291	4.9939	5.0915	5.0763	4.8567	5.0551	4.7597	4.795	5.0381	4.9445	4.8026	4.9268	4.6794	5.0789	4.7371	5.1381	5.1216	4.94	5.0278	5.0208	5.0291	pos_407	metab_406	121.04	0.6653	pos	-	-	-	-	-	0.0943566
metab_407	-	-	-	5.4113	5.2564	5.4114	5.0482	5.2369	5.1591	5.0413	5.2531	5.2331	5.3262	5.2783	5.1439	5.1692	5.0896	5.071	5.0727	5.1833	5.2117	5.1675	5.145	5.2256	5.1108	5.1198	5.214	5.1936	5.1937	5.1744	5.1952	pos_408	metab_407	114.092	0.6653	pos	-	-	-	-	-	0.0225933
metab_408	-	-	-	5.056	5.1628	4.9198	4.6886	5.0397	5.0012	5.1381	5.1065	5.3522	5.011	5.2306	5.1215	5.1665	5.056	5.142	5.1159	5.305	5.0369	5.1176	5.0972	5.0653	5.0108	5.0849	5.0627	5.0959	5.0962	5.0999	5.1017	pos_409	metab_408	263.139	2.2177	pos	-	-	-	-	-	0.00651114
metab_409	-	-	-	4.4985	4.4585	4.5096	4.0179	4.2889	4.2121	4.1871	4.2558	4.3641	4.2504	4.3039	4.6521	4.7685	4.7247	4.7125	4.7452	4.7182	4.6689	4.7065	4.7102	4.7612	4.7545	4.6989	4.7629	4.5633	4.5757	4.5698	4.585	pos_410	metab_409	348.192	2.2177	pos	-	-	-	-	-	0.0212989
metab_410	-	-	-	5.3899	5.4561	5.3634	5.416	5.4868	5.3995	5.5545	5.4701	5.4572	5.4691	5.7321	5.1706	5.1316	5.069	5.1466	5.3559	5.3206	5.3687	5.3287	5.4839	5.3761	5.3759	5.3228	5.4546	5.3993	5.4079	5.3947	5.3966	pos_411	metab_410	72.0815	0.6653	pos	-	-	-	-	-	0.0135603
metab_411	-	-	-	4.6861	4.7039	5.3989	4.6305	4.9828	5.0016	4.9551	4.9867	5.1702	4.7282	5.5016	5.1578	5.2398	5.1772	5.1663	5.1765	5.2006	5.1305	5.115	5.0928	5.134	5.0373	5.1113	5.1533	5.0818	5.087	5.0353	5.0885	pos_412	metab_411	294.181	0.6464	pos	-	-	-	-	-	0.0568671
N-(1-Deoxy-1-fructosyl)proline	-	HMDB0038493	C11H19NO7	5.2366	4.9415	4.9382	4.8083	5.5913	4.9621	4.9691	5.5184	5.4243	5.0581	5.4251	5.2823	5.3135	5.2435	5.3209	5.2408	5.3717	5.201	5.0436	5.1108	5.1722	4.9665	5.2036	5.1129	5.2104	5.2106	5.2122	5.2145	pos_413	metab_412	242.102	0.6464	pos	M+H-H2O, M+H, M+H-2H2O	-	65	0.581341	29118-61-4	0.00436847
metab_413	-	-	-	4.9163	4.9397	4.9425	4.6265	4.9666	4.9138	4.8697	4.889	5.0208	5.0052	4.8623	5.1196	5.0511	5.0406	5.0552	4.9064	5.0881	4.9585	5.0395	5.054	5.0433	4.9248	5.0181	5.0701	4.9417	4.942	4.945	4.9554	pos_414	metab_413	140.107	0.6464	pos	-	-	-	-	-	0.0149381
metab_414	-	-	-	5.4983	5.3415	5.4143	5.7489	5.4834	5.4383	5.4885	5.628	5.5124	5.4625	5.5341	5.5417	5.5445	5.5596	5.5822	5.5055	5.6404	5.5055	5.4801	5.5064	5.4772	5.4514	5.5019	5.4938	5.4714	5.4856	5.4817	5.487	pos_415	metab_414	126.055	0.6464	pos	-	-	-	-	-	0.0161926
metab_415	-	-	-	4.8047	4.7204	4.937	3.7937	4.2486	4.1429	3.8503	4.3221	4.2613	4.4455	4.373	4.2366	4.4905	4.3812	4.3833	4.5509	4.4504	4.5809	4.4225	4.4198	4.5134	4.5879	4.4458	4.5449	4.4658	4.4979	4.4976	4.4994	pos_416	metab_415	390.239	2.3059	pos	-	-	-	-	-	0.0367131
metab_416	-	-	-	4.9756	4.9759	5.0227	4.7986	4.755	4.6956	4.7328	4.7986	4.8546	4.9119	4.8869	4.7705	4.8539	4.7555	4.8108	4.8213	4.8299	4.8667	5.0063	4.9437	5.3287	5.3056	4.9118	5.0833	4.9288	4.9297	4.9336	4.9354	pos_417	metab_416	384.213	2.3281	pos	-	-	-	-	-	0.00730376
metab_417	-	-	-	4.6673	4.7608	4.6616	4.5157	4.7328	4.6536	4.6545	4.5645	4.7171	4.8189	4.6586	4.5148	4.5997	4.4201	4.5282	4.5382	4.5464	4.6076	4.5119	4.5182	4.5944	4.5526	4.6289	4.5959	4.5778	4.5783	4.5844	4.5835	pos_418	metab_417	191.082	2.3505	pos	-	-	-	-	-	0.00782825
metab_418	-	-	-	5.4057	5.4436	5.3169	5.2433	5.4042	5.3095	5.3675	5.2658	5.408	5.4783	5.3759	5.2172	5.3255	5.132	5.2412	5.2499	5.2903	5.3265	5.2167	5.2789	5.2827	5.2301	5.3244	5.2967	5.3082	5.298	5.3023	5.3012	pos_419	metab_418	325.139	2.3505	pos	-	-	-	-	-	0.00988107
metab_419	-	-	-	3.3376	3.5129	3.3339	2.9746	3.355	3.8019	3.6419	3.5115	3.7328	3.5051	3.6162	4.6228	3.9018	4.2158	4.0106	3.7821	4.1532	3.6618	3.7769	3.8052	3.394	3.5834	3.934	3.6154	3.8146	3.8148	3.8208	3.8201	pos_420	metab_419	318.144	2.3505	pos	-	-	-	-	-	0.0077023
metab_420	-	-	-	4.1133	4.0927	3.8754	3.7652	4.0626	4.0809	4.1476	3.9515	4.2924	4.2254	4.1472	4.81	4.8827	4.6406	4.6686	4.8644	4.7021	4.8902	4.7908	4.7675	4.8978	4.8846	4.669	4.9434	4.5834	4.5729	4.5896	4.5915	pos_421	metab_420	242.102	2.3281	pos	-	-	-	-	-	0.0192748
metab_421	-	-	-	4.5811	4.5726	4.8351	4.787	4.3788	4.5275	4.6975	4.4936	4.8845	4.7544	4.4223	4.1671	4.1706	4.4297	4.1854	4.1704	4.2767	4.262	4.7803	4.6144	4.4262	4.6089	4.5873	4.72	4.5387	4.5781	4.5886	4.5906	pos_422	metab_421	312.088	2.3945	pos	-	-	-	-	-	0.0542959
metab_422	-	-	-	3.8986	3.948	4.0721	3.539	3.5485	3.8168	3.8217	3.9312	3.9712	3.967	3.8914	3.3719	3.1384	3.6439	3.545	3.5232	3.623	3.7814	3.7429	3.7647	4.6632	4.5508	3.6461	3.5367	3.8552	3.8559	3.866	3.8681	pos_423	metab_422	191.143	2.3945	pos	-	-	-	-	-	0.0154494
metab_423	-	-	-	5.3877	5.312	5.2634	5.0082	5.3487	5.2713	5.2457	5.2762	5.3869	5.3738	5.2855	5.5882	5.5968	5.5804	5.6191	5.5546	5.5973	5.5738	5.5367	5.483	5.5475	5.4742	5.5235	5.547	5.3996	5.4125	5.4121	5.414	pos_424	metab_423	112.076	0.6464	pos	-	-	-	-	-	0.0152542
metab_424	-	-	-	4.9447	4.9329	4.819	4.6507	4.9331	4.8707	4.8266	4.7833	4.9075	5.0361	4.8853	4.5115	4.4869	4.5213	4.5309	4.5245	4.584	4.5123	4.3838	4.4066	4.2206	4.127	4.4794	4.5343	4.6866	4.6889	4.6935	4.6953	pos_425	metab_424	159.117	2.4609	pos	-	-	-	-	-	0.00931471
metab_425	-	-	-	4.9665	4.9593	4.8384	4.6611	4.9606	4.8913	4.839	4.808	4.944	5.0603	4.9026	4.5661	4.5093	4.5482	4.5533	4.5468	4.6152	4.5268	4.4177	4.4401	4.2483	4.0995	4.5048	4.5477	4.7189	4.7284	4.7299	4.7318	pos_426	metab_425	211.112	2.4609	pos	-	-	-	-	-	0.0131767
metab_426	-	-	-	5.0552	5.0555	4.9548	4.757	5.0416	4.9663	4.9684	4.9002	5.0399	5.1465	4.9772	4.7215	4.6744	4.7373	4.6867	4.7118	4.7789	4.6851	4.6009	4.6007	4.4261	4.6706	4.7051	4.7162	4.8432	4.848	4.8514	4.8532	pos_427	metab_426	203.107	2.4609	pos	-	-	-	-	-	0.0101277
(R)-Pterosin B	-	HMDB0030759	C14H18O2	5.1114	5.1041	4.982	4.8077	5.103	5.0252	5.0043	4.9667	5.0817	5.202	5.0322	4.7206	4.701	4.686	4.6991	4.7034	4.7839	4.6762	4.5614	4.5852	4.138	4.0232	4.639	4.6946	4.8629	4.8646	4.8671	4.8704	pos_428	metab_427	201.127	2.4609	pos	M+H-H2O, M+H, M+H-2H2O	-	65.2	-0.260077	34175-96-7	0.00747626
Trigoforin	-	HMDB0029495	C12H12O2	4.7775	4.7224	4.6487	4.3922	4.7678	4.6688	4.6341	4.6325	4.7404	4.8702	4.6814	4.7231	4.7013	4.6749	4.6962	4.6588	4.7538	4.6725	4.6445	4.6249	4.6124	4.5553	4.7281	4.6937	4.6603	4.6389	4.6732	4.6689	pos_429	metab_428	189.091	2.4609	pos	M+H, 2M+H, M+H-H2O	52.2	-	0.306703	14002-93-8	0.0347386
metab_429	-	-	-	4.5398	4.5559	4.4766	4.3817	4.6814	4.6796	4.6847	4.6196	4.8149	4.7572	4.5832	4.5938	4.5412	4.6118	4.6373	4.5342	4.6219	4.6004	4.5525	4.5351	5.1335	5.1053	4.6393	4.5093	4.6268	4.6488	4.65	4.6422	pos_430	metab_429	193.123	2.5263	pos	-	-	-	-	-	0.0244049
metab_430	-	-	-	5.0862	5.0946	5.037	4.7054	5.0144	4.9285	4.8741	4.9127	4.9932	5.1001	4.9807	4.766	4.7855	4.7633	4.76	4.7979	4.8495	4.9318	4.8727	4.9503	4.8799	4.8435	4.9224	4.9525	4.9179	4.9182	4.9298	4.9245	pos_431	metab_430	175.076	2.4609	pos	-	-	-	-	-	0.0130819
metab_431	-	-	-	4.702	4.6983	4.5725	4.3946	4.6554	4.5884	4.5611	4.5143	4.6418	4.7769	4.5969	4.2314	4.2412	4.2389	4.2504	4.2632	4.2765	4.2613	4.0964	4.1304	3.787	3.6129	4.1808	4.2251	4.4132	4.4156	4.4232	4.4241	pos_432	metab_431	173.096	2.4609	pos	-	-	-	-	-	0.0125838
metab_432	-	-	-	5.4505	5.3589	5.1905	5.1778	5.3709	5.3169	5.2958	5.1231	5.3165	5.5945	5.0518	4.846	4.8072	4.7182	4.7127	4.8016	4.8786	4.8249	4.8516	4.8741	5.0039	4.8823	4.9164	4.9212	5.1053	5.1058	5.0972	5.0627	pos_433	metab_432	605.34	2.5487	pos	-	-	-	-	-	0.0460614
metab_433	-	-	-	4.5406	4.4519	4.2512	4.1538	4.4664	4.3653	4.4236	4.2721	4.3618	4.5304	4.1371	3.7315	3.902	3.9348	3.9854	3.9845	3.7316	3.7752	3.6481	3.9005	3.9132	3.8848	3.7946	3.8219	4.1589	4.1317	4.1443	4.132	pos_434	metab_433	436.244	2.5487	pos	-	-	-	-	-	0.0298046
metab_434	-	-	-	5.3578	5.1384	5.1069	5.2199	5.1069	5.0505	5.0791	5.4044	5.2927	5.1199	5.0696	5.5624	5.6362	5.6319	5.5987	5.6016	5.6322	5.6875	5.6415	5.5704	5.598	5.551	5.5843	5.5628	5.3884	5.3931	5.4237	5.3903	pos_435	metab_434	391.185	0.6269	pos	-	-	-	-	-	0.0390453
metab_435	-	-	-	4.7863	4.841	4.715	4.5248	4.9312	4.8524	4.8841	4.7838	4.9497	5.0051	4.9203	4.8843	4.8586	4.8578	4.8972	4.8874	4.9757	4.8859	4.8271	4.8445	4.7593	4.7727	4.9481	4.9158	4.8568	4.8653	4.8712	4.8719	pos_436	metab_435	221.129	2.6149	pos	-	-	-	-	-	0.0160603
metab_436	-	-	-	4.334	4.3165	4.0841	3.9773	4.6572	4.5763	4.5959	4.565	4.6879	4.7444	4.6961	4.4747	4.6104	4.647	4.6122	4.7053	4.5497	4.6564	4.4978	4.6164	4.2597	4.1871	4.6701	4.7178	4.5397	4.5575	4.5495	4.5638	pos_437	metab_436	367.165	2.5927	pos	-	-	-	-	-	0.0239725
1,4-Ipomeadiol	-	HMDB0030471	C9H14O3	5.0877	5.0726	4.9903	4.8066	5.081	5.0292	5.0075	4.9596	5.1228	5.1863	4.9986	4.7584	4.7106	4.7669	4.7494	4.74	4.7987	4.7309	4.6771	4.6785	4.6341	4.5574	4.7605	4.7795	4.8903	4.8906	4.8932	4.8951	pos_438	metab_437	135.081	2.4609	pos	M+H-2H2O, M+Na, M+H-H2O	-	54	0.852126	53011-73-7	0.00520795
metab_438	-	-	-	5.0126	5.0631	4.9538	4.7158	4.9981	4.9401	4.7235	4.8191	4.811	5.0579	4.9687	5.2325	5.2684	5.1282	5.1928	5.2736	5.2526	5.1802	5.0439	5.1249	5.1918	5.1591	5.1668	5.1807	5.1243	5.1196	5.1271	5.129	pos_439	metab_438	315.17	2.6367	pos	-	-	-	-	-	0.00936981
metab_439	-	-	-	5.3767	5.4094	5.2086	4.6449	4.0078	3.7601	3.828	3.9964	4.2615	3.9489	4.0918	4.0852	4.1476	4.2094	4.1207	4.1711	4.2138	4.4008	4.4803	4.4768	5.1228	5.0362	4.4882	4.3637	4.631	4.6317	4.6137	4.598	pos_440	metab_439	442.261	2.4387	pos	-	-	-	-	-	0.0366677
metab_440	-	-	-	4.3007	4.6528	4.3341	3.9971	4.2511	4.2059	4.3218	3.9851	4.0825	4.7848	4.1385	4.963	5.1275	4.7176	4.8663	4.5425	4.6793	4.6067	5.0553	4.6727	4.5713	4.9348	4.5839	4.5944	4.6146	4.6445	4.6441	4.6459	pos_441	metab_440	278.1	2.6589	pos	-	-	-	-	-	0.0342958
metab_441	-	-	-	3.0265	1.124	3.9445	2.0273	1.4337	2.0394	3.008	2.3749	1.9021	1.396	1.6332	5.0898	2.7994	3.5207	2.6361	2.8989	2.8926	3.5543	5.114	5.3559	2.9027	4.2458	1.2913	5.6032	4.4884	4.5051	4.5119	4.514	pos_442	metab_441	238.119	2.6589	pos	-	-	-	-	-	0.0265068
metab_442	-	-	-	4.8209	4.8047	4.6705	4.2997	4.7686	4.6363	4.3632	4.6171	4.7754	4.8274	4.5579	5.1783	5.2573	5.2641	5.2432	5.2006	5.3142	5.2095	5.1033	5.1348	5.2133	5.1962	5.2122	5.1643	4.9023	4.9025	4.9021	4.8847	pos_443	metab_442	384.213	0.6269	pos	-	-	-	-	-	0.0200388
metab_443	-	-	-	5.5344	5.5209	5.472	5.3847	5.462	5.5358	5.2512	5.5775	5.4977	5.671	5.6654	5.212	5.3236	5.4008	5.3194	5.1104	5.0398	5.2182	5.3399	5.2725	5.2734	5.4171	5.4368	5.2432	5.4015	5.3972	5.3977	5.3932	pos_444	metab_443	101.06	0.6269	pos	-	-	-	-	-	0.0078201
metab_444	-	-	-	5.5515	5.5911	5.4857	5.4485	5.5357	5.4192	5.6287	5.5232	5.6684	5.5496	5.5846	5.6657	5.6257	5.6142	5.6496	5.6871	5.7175	5.6671	5.6943	5.7046	5.676	5.6489	5.6526	5.7054	5.5779	5.5781	5.5814	5.5832	pos_445	metab_444	70.0659	0.6269	pos	-	-	-	-	-	0.00598978
metab_445	-	-	-	4.3606	4.205	4.2352	4.1093	4.2498	4.3345	4.2076	4.3021	4.437	4.5092	4.2548	4.6499	4.45	4.6204	4.4425	4.5687	4.4356	4.6249	4.6188	4.6482	4.4239	4.6141	4.5502	4.5649	4.4305	4.4219	4.443	4.4543	pos_446	metab_445	235.083	0.609	pos	-	-	-	-	-	0.0327233
metab_446	-	-	-	4.8953	4.3422	4.3502	4.261	4.1955	4.5532	4.5334	4.6114	4.6757	4.7943	4.5557	4.0091	3.6539	3.7975	3.5806	4.2364	4.256	4.1927	4.2827	4.3154	4.4284	4.2863	4.3254	4.1241	4.4073	4.3994	4.3904	4.3607	pos_447	metab_446	591.324	2.7258	pos	-	-	-	-	-	0.0461296
metab_447	-	-	-	4.8887	4.7555	4.9462	4.6935	4.9404	4.9883	5.1542	4.8209	4.9443	5.2884	5.0709	5.1755	5.3227	5.1106	5.1701	5.1159	5.0976	5.1353	4.9602	4.9853	5.113	4.9917	5.0435	5.0848	5.0263	5.0265	5.0296	5.0366	pos_448	metab_447	190.107	0.609	pos	-	-	-	-	-	0.0111148
metab_448	-	-	-	5.4361	5.7712	5.3839	5.5925	5.457	5.4859	5.3989	5.5174	5.3701	5.9	5.5818	4.3991	4.4972	4.3226	4.3594	4.5169	4.6525	4.5836	4.3759	4.5487	4.9878	4.6461	4.7183	4.7583	5.32	5.3434	5.343	5.3448	pos_449	metab_448	397.306	2.7701	pos	-	-	-	-	-	0.027031
metab_449	-	-	-	2.7731	2.6799	2.8845	4.1716	5.3131	5.1151	4.3085	3.1213	2.7548	6.2267	3.6885	6.0421	5.9139	5.9218	5.506	4.3651	5.9907	2.7557	2.7257	3.0241	4.6005	4.4993	4.2417	2.7723	5.2503	5.251	5.2391	5.217	pos_450	metab_449	639.324	2.7701	pos	-	-	-	-	-	0.0360173
metab_450	-	-	-	5.5662	5.2918	5.4836	5.779	5.6022	5.604	5.5958	5.7298	5.5237	5.5809	5.5916	5.4436	5.4612	5.3921	5.4707	5.4055	5.5953	5.5014	5.464	5.5017	5.3965	5.3182	5.3415	5.4479	5.49	5.4882	5.4947	5.5042	pos_451	metab_450	186.076	0.609	pos	-	-	-	-	-	0.0165341
metab_451	-	-	-	5.7965	5.7374	5.7377	5.6918	5.8872	5.8378	5.9291	5.8699	5.9105	5.847	5.9792	5.8912	5.8204	5.8948	5.8292	5.8698	5.8821	5.8622	5.9011	5.8876	5.8522	5.848	5.7927	5.9044	5.8108	5.8124	5.8154	5.8122	pos_452	metab_451	116.071	0.609	pos	-	-	-	-	-	0.00448685
metab_452	-	-	-	4.1696	4.6109	4.3511	3.9002	4.6398	4.5323	4.4528	4.5638	4.6301	4.7097	4.6973	4.5419	4.7152	4.8622	4.8451	4.8581	4.7247	4.8884	4.7344	4.7806	4.374	4.235	4.8182	4.8683	4.6183	4.6076	4.613	4.6107	pos_453	metab_452	516.25	2.8146	pos	-	-	-	-	-	0.0103902
metab_453	-	-	-	5.1419	5.224	4.9841	5.0443	5.0809	5.0093	4.9887	4.894	5.0187	5.1983	5.0861	5.1729	5.0027	5.3277	5.3715	5.1049	5.0661	5.0233	5.0708	5.3377	4.9837	5.1794	5.3806	5.2345	5.1118	5.1121	5.1117	5.1019	pos_454	metab_453	111.056	0.609	pos	-	-	-	-	-	0.0114337
metab_454	-	-	-	4.0068	4.1299	3.9265	3.5811	4.6313	4.4072	4.0041	3.9051	3.8307	5.4399	3.8487	5.844	5.5815	5.5969	5.2202	4.7389	5.7044	4.2356	4.3678	4.2414	4.7744	4.8105	4.7444	4.4163	4.934	4.9537	4.9266	4.9201	pos_455	metab_454	555.28	2.8367	pos	-	-	-	-	-	0.0337912
metab_455	-	-	-	4.9586	4.9754	5.3343	4.536	4.8627	4.8435	4.7425	4.8703	5.019	4.9839	4.8446	6.1095	5.7176	6.0978	5.5873	6.0069	5.5171	5.9728	5.9728	5.9802	6.0887	6.0459	5.4395	6.0741	5.6614	5.6546	5.6519	5.6537	pos_456	metab_455	317.145	0.5905	pos	-	-	-	-	-	0.0095626
Niacinamide	C00153	HMDB0001406	C6H6N2O	5.1351	4.8864	4.9786	4.7414	4.9647	4.9502	4.8348	5.0116	4.9764	4.8119	4.8588	5.0859	5.2192	5.1948	5.221	5.1534	5.1525	5.2501	5.1556	5.1713	5.2799	5.2336	5.2409	5.2836	5.0434	5.0788	5.0716	5.0802	pos_457	metab_456	262.129	0.5905	pos	M+NH4, 2M+NH4, M+H	62.5	-	0.548887	98-92-0	0.0388577
metab_457	-	-	-	3.5642	3.2466	3.2753	3.0371	3.524	3.247	2.883	3.1289	3.8387	3.1667	2.8194	4.0564	4.3276	4.43	4.3484	4.3466	4.1199	4.5053	3.9335	4.6119	4.1133	3.9207	4.6597	4.4303	3.9813	4.0405	4.0521	4.0292	pos_458	metab_457	451.184	2.8813	pos	-	-	-	-	-	0.0697294
metab_458	-	-	-	5.5081	5.2284	5.1053	4.9416	5.3367	5.2038	4.9837	5.2675	5.3239	5.1604	5.2075	5.64	5.655	5.6863	5.7567	5.5922	5.794	5.4816	5.3501	5.4112	5.4494	5.3595	5.5187	5.4671	5.3918	5.4049	5.404	5.4064	pos_459	metab_458	248.113	0.5905	pos	-	-	-	-	-	0.0153935
metab_459	-	-	-	5.1418	5.5224	4.9847	5.1187	5.2589	5.1825	5.1328	5.2388	5.2116	5.4841	5.2667	4.617	4.6706	4.4989	4.5239	4.6297	4.6928	4.7393	4.5945	4.7297	4.842	4.8036	4.794	4.847	5.0818	5.0894	5.0894	5.0913	pos_460	metab_459	397.306	2.9258	pos	-	-	-	-	-	0.00961203
metab_460	-	-	-	5.129	4.9981	5.065	4.9559	5.072	5.0185	5.061	5.063	5.1523	5.1458	5.0228	5.3668	5.3514	5.3344	5.3573	5.2877	5.3889	5.1288	5.0523	5.0748	5.1473	5.0399	5.0976	5.0784	5.1148	5.1151	5.1166	5.1279	pos_461	metab_460	230.102	0.5905	pos	-	-	-	-	-	0.0144382
metab_461	-	-	-	4.6186	4.6005	4.6524	3.9262	4.5655	4.5658	4.6061	4.4575	4.7456	4.6812	4.5122	5.4069	5.0517	5.5006	4.9369	5.2943	4.9587	5.2703	5.3052	5.3189	5.3371	5.3357	4.9068	5.4114	5.0208	5.0259	5.0073	5.046	pos_462	metab_461	227.114	0.5905	pos	-	-	-	-	-	0.0371317
metab_462	-	-	-	5.1154	5.0574	5.0523	4.7538	5.0879	5.0266	5.0181	5.0094	5.182	5.1162	5.0231	5.5827	5.4623	5.5982	5.4307	5.4697	5.4313	5.4549	5.5085	5.433	5.493	5.4216	5.3304	5.5281	5.2271	5.252	5.2482	5.2645	pos_463	metab_462	165.102	0.5905	pos	-	-	-	-	-	0.0355522
metab_463	-	-	-	5.9761	6.011	5.9618	5.6578	6.0368	5.9481	5.9792	5.9719	6.0469	6.0281	5.9642	6.2801	6.2874	6.2851	6.2848	6.2531	6.2973	6.2269	6.1895	6.184	6.2485	6.1603	6.2529	6.2513	6.0686	6.0794	6.079	6.0808	pos_464	metab_463	130.086	0.5905	pos	-	-	-	-	-	0.0128601
metab_464	-	-	-	6.2109	5.7642	5.9877	6.2198	6.1579	6.1482	6.0896	5.9198	6.2697	6.2335	6.2201	6.3677	6.2763	6.2203	6.2544	6.169	6.2828	6.1071	6.03	6.0485	6.1283	6.2656	6.2348	6.1894	6.1657	6.1692	6.1676	6.1718	pos_465	metab_464	110.009	0.5105	pos	-	-	-	-	-	0.00595914
metab_465	-	-	-	4.6863	3.7552	4.4724	4.9196	4.6627	4.6952	4.2751	4.3421	4.8148	4.8258	4.7076	4.7811	4.7351	4.0983	4.7475	4.2119	4.7023	4.1993	3.3124	4.107	4.2067	4.7058	4.3269	4.6245	4.5415	4.5242	4.4729	4.5421	pos_466	metab_465	536.888	0.4927	pos	-	-	-	-	-	0.0727163
metab_466	-	-	-	5.0763	4.4234	4.847	4.971	4.9433	4.9394	4.7004	4.7195	4.914	5.0871	5.1834	5.0791	5.0372	5.1273	5.1408	4.9409	5.0527	4.8408	4.7556	4.7661	4.8612	4.8834	5.0122	4.9094	4.8681	4.816	4.8176	4.8169	pos_467	metab_466	466.881	0.4927	pos	-	-	-	-	-	0.0607614
metab_467	-	-	-	4.9188	4.8851	4.8302	4.449	4.8253	4.7373	4.5998	4.7243	4.7992	4.8805	4.8269	5.074	5.1139	5.0998	5.1126	5.1015	5.1787	5.0843	4.985	4.9546	5.1394	4.9246	5.037	4.9509	4.9086	4.9276	4.9084	4.9102	pos_468	metab_467	299.16	0.6653	pos	-	-	-	-	-	0.0216368
metab_468	-	-	-	5.6707	5.578	5.5087	5.3466	5.5748	5.5056	5.5167	5.5056	5.6973	5.6799	5.5736	6.0186	6.0543	5.9471	5.9719	5.9757	5.9782	5.9241	5.8139	5.8359	5.9915	5.8422	5.876	5.8817	5.7462	5.754	5.7422	5.744	pos_469	metab_468	303.119	0.6653	pos	-	-	-	-	-	0.0119958
metab_469	-	-	-	3.0088	3.2962	3.1786	3.2038	5.7546	5.6203	5.5544	5.6589	5.8971	5.6835	5.7106	3.9403	3.6844	3.7615	3.6262	3.3882	5.0226	3.6402	5.4765	3.8418	3.4364	3.7647	3.5667	3.9724	5.261	5.2799	5.2573	5.2591	pos_470	metab_469	435.153	3.0589	pos	-	-	-	-	-	0.0245038
metab_470	-	-	-	4.3743	4.3598	4.2746	3.8152	3.9906	4.0173	4.0088	4.0968	4.0283	3.9092	4.3779	4.2779	4.6224	4.5238	4.6975	4.7585	4.4695	4.3769	4.5272	4.4785	4.4799	4.444	4.4639	4.5091	4.3151	4.3277	4.3215	4.3263	pos_471	metab_470	381.163	3.0589	pos	-	-	-	-	-	0.0130651
metab_471	-	-	-	3.906	3.8673	3.7758	3.3772	3.9044	3.584	3.6276	3.4717	4.172	3.6858	3.7033	3.9658	3.899	3.816	4.2795	4.0397	3.8609	4.1871	3.8796	4.2227	4.1733	3.5879	3.6667	3.7815	3.8823	3.7468	3.7273	3.7966	pos_472	metab_471	323.16	0.6653	pos	-	-	-	-	-	0.165524
metab_472	-	-	-	4.3953	4.4955	4.3222	4.0162	3.9622	3.962	4.0249	4.3365	4.4084	3.8912	4.4154	3.1156	3.9199	3.7978	4.0337	4.3652	3.5193	4.4407	4.3944	4.4143	4.258	4.2264	4.0871	4.3475	4.2519	4.2676	4.2587	4.2624	pos_473	metab_472	460.229	3.1034	pos	-	-	-	-	-	0.0151852
Chondroitin	C00401	HMDB0000629	C14H21NO11	4.1733	2.4086	4.9887	6.2015	2.4945	3.9022	5.0293	4.6349	3.5435	3.1402	5.2526	3.6418	2.5664	2.4961	2.6459	2.4864	2.5689	2.4843	3.2023	3.8806	4.8814	3.2531	3.1152	3.1649	4.5663	4.5665	4.5341	4.5632	pos_474	metab_473	362.108	0.6653	pos	M+H-H2O, M+H, M+H-2H2O	-	80.5	0.167962	9007-27-6	0.0355035
metab_474	-	-	-	4.0675	3.9298	4.0086	3.9543	4.1928	4.1028	3.9431	3.8504	3.9431	4.1187	4.2133	4.8621	4.8617	4.7261	4.9515	4.96	4.9065	4.8969	4.5309	4.6557	4.9425	4.5986	4.7625	4.5969	4.4099	4.3976	4.4107	4.2785	pos_475	metab_474	393.169	0.6653	pos	-	-	-	-	-	0.136774
metab_475	-	-	-	4.4858	4.4992	4.4605	3.9885	4.6237	4.3677	4.226	4.5002	4.5346	4.404	4.5059	4.8816	4.9355	4.9307	4.8634	4.8449	4.8673	4.8829	4.7494	4.7701	4.9208	4.6767	4.8381	4.7857	4.5874	4.5942	4.5874	4.607	pos_476	metab_475	338.207	0.6653	pos	-	-	-	-	-	0.0214092
metab_476	-	-	-	5.2411	4.8302	4.7779	5.1567	4.9584	4.7413	4.8824	4.8339	5.19	4.8712	4.9102	5.2715	5.3294	5.3128	5.3854	5.2604	5.3693	5.3495	5.1682	5.2302	5.3469	5.1773	5.2405	5.3164	5.1812	5.1814	5.1681	5.1829	pos_477	metab_476	238.071	0.6843	pos	-	-	-	-	-	0.0157251
metab_477	-	-	-	4.2101	4.1047	4.1033	3.4807	4.4222	4.275	4.2164	4.2911	4.5263	4.3369	4.2639	4.4641	4.8667	4.6872	4.9136	4.6433	4.8642	4.5467	4.5821	4.5299	4.7862	4.3816	4.6501	4.4304	4.4755	4.4482	4.4368	4.4364	pos_478	metab_477	316.139	0.6653	pos	-	-	-	-	-	0.042954
metab_478	-	-	-	4.6343	3.6594	3.3563	3.2625	3.6769	3.4552	3.5006	3.5284	3.6515	3.1868	3.8155	3.6959	3.5849	3.4728	3.6373	3.6506	3.8739	4.2878	3.5926	4.1025	6.1039	5.2737	4.7135	3.7842	5.03	5.0427	5.0423	5.0389	pos_479	metab_478	415.223	3.1921	pos	-	-	-	-	-	0.0135623
metab_479	-	-	-	5.3877	4.0368	4.3853	4.6834	3.3837	3.3044	3.3027	3.4587	3.4535	3.764	3.1307	4.0268	4.2024	4.1596	4.0389	4.1973	4.0908	4.6217	4.1352	4.6723	6.7123	5.6739	5.0025	4.3377	5.578	5.5818	5.5856	5.5797	pos_480	metab_479	445.233	3.1921	pos	-	-	-	-	-	0.00760646
metab_480	-	-	-	4.8498	4.8723	4.8225	4.8202	4.924	4.8292	4.8881	4.9294	4.89	4.9041	5.0965	4.6865	4.621	4.6137	4.6159	4.7553	4.828	4.8547	4.8112	4.9082	4.8017	4.8021	4.8101	4.825	4.8353	4.8028	4.8091	4.8041	pos_481	metab_480	104.053	0.7022	pos	-	-	-	-	-	0.035687
metab_481	-	-	-	4.6641	4.6569	4.5408	4.452	4.545	4.4393	4.4888	4.4555	4.7179	4.649	4.471	4.217	4.1837	4.0986	4.1426	4.239	4.2252	4.3453	4.3378	4.3678	4.498	4.33	4.4096	4.4743	4.4254	4.4349	4.4393	4.4411	pos_482	metab_481	409.27	3.2369	pos	-	-	-	-	-	0.0160915
metab_482	-	-	-	2.4995	2.884	3.3141	5.6929	1.6121	1.1262	1.1687	2.3788	1.088	2.3825	2.5487	2.3967	2.0795	0.56	0.5637	1.5737	2.8086	2.2868	2.2198	2.6875	5.4518	5.5898	2.773	0.5634	4.5805	4.606	4.5803	4.5882	pos_483	metab_482	484.281	3.2369	pos	-	-	-	-	-	0.0281293
metab_483	-	-	-	3.8804	3.7574	3.8328	3.5877	3.6278	3.8526	3.817	3.6628	3.7693	3.952	3.824	2.9166	3.0238	3.4051	3.2581	3.5012	3.498	3.0059	3.4276	3.2248	4.499	4.5862	3.4947	3.1578	3.5133	3.673	3.6733	3.6637	pos_484	metab_483	229.122	3.2815	pos	-	-	-	-	-	0.164302
metab_484	-	-	-	5.0679	2.9695	4.7684	4.3978	4.9044	4.6867	4.5559	4.9261	4.3399	4.4557	5.0869	4.3119	4.289	4.888	4.9713	4.1616	4.9098	4.2757	4.2732	4.5749	3.657	3.7641	3.9939	4.5189	4.5897	4.6035	4.592	4.5958	pos_485	metab_484	496.252	3.2591	pos	-	-	-	-	-	0.014016
metab_485	-	-	-	3.3379	2.9998	2.4749	2.5632	3.0263	2.7368	3.4109	3.0701	3.2335	3.0711	3.2786	5.1605	4.0026	4.0534	4.0628	3.7245	3.4057	4.0493	4.3366	4.0736	4.366	3.128	4.3529	4.4095	3.9302	3.9193	3.9303	3.8842	pos_486	metab_485	353.111	3.3037	pos	-	-	-	-	-	0.0491947
metab_486	-	-	-	4.5156	4.4088	4.1036	3.5845	4.2236	3.5261	3.867	3.8071	4.4952	3.8959	4.0952	4.4594	4.5865	4.5669	4.6154	4.6572	4.1135	4.7725	4.2903	4.7529	4.7977	4.4923	4.7457	4.7474	4.3956	4.4085	4.3983	4.4025	pos_487	metab_486	473.142	3.2369	pos	-	-	-	-	-	0.0129749
metab_487	-	-	-	4.0983	4.2145	4.1291	3.8713	4.182	4.1101	4.148	4.0783	4.4448	4.2686	4.1033	4.0909	4.0008	3.9771	4.052	3.9903	3.9473	4.1238	4.4728	4.6697	3.8777	3.9472	4.1441	4.6162	4.198	4.1778	4.1915	4.1997	pos_488	metab_487	311.147	3.2369	pos	-	-	-	-	-	0.0227358
Jasmolone glucoside	-	HMDB0032870	C17H26O7	4.1874	4.0469	4.0162	3.2616	4.3623	3.9618	4.2169	3.874	4.5368	4.1206	4.0082	4.9945	5.0475	5.0287	4.9318	5.1415	4.8009	4.9664	4.8935	4.9938	4.9317	4.902	5.0399	5.0795	4.7244	4.7031	4.7054	4.6813	pos_489	metab_488	384.192	3.3481	pos	M+CH3OH+H, M+ACN+Na, M+ACN+H	-	70	-6.75804	-	0.0405056
metab_489	-	-	-	4.1983	4.1736	3.7598	4.0881	4.2389	4.199	4.0878	4.0194	4.3331	4.2746	4.1188	4.0976	4.0313	4.0605	4.1895	4.0467	4.1774	3.9127	4.055	3.8554	4.1454	4.0113	4.0889	3.8161	4.0892	4.0752	4.0747	4.0821	pos_490	metab_489	122.024	0.7022	pos	-	-	-	-	-	0.0158311
metab_490	-	-	-	5.4032	5.6848	5.8929	5.8362	4.192	4.2232	4.4181	3.9912	4.3793	4.5726	4.0277	3.9876	3.8721	3.9154	3.8289	4.0097	4.143	4.1496	4.2339	4.2329	4.2658	4.12	4.2763	4.1639	5.1121	5.1059	5.1119	5.0495	pos_491	metab_490	504.247	3.3704	pos	-	-	-	-	-	0.0675078
metab_491	-	-	-	2.7065	2.4862	2.8323	2.613	5.5506	5.3519	5.2873	5.0339	5.543	5.5347	5.3871	3.841	3.8269	3.8863	3.6457	3.8112	4.9295	3.9365	5.3633	3.7809	3.7934	3.6668	4.1363	4.3788	4.9731	4.9843	4.984	4.9858	pos_492	metab_491	419.158	3.3918	pos	-	-	-	-	-	0.013367
metab_492	-	-	-	5.1249	5.0889	5.017	4.8585	5.0442	4.9641	4.9756	4.9021	5.088	5.1227	5.0127	4.9279	4.9448	4.9052	4.9268	4.9957	4.9879	4.969	4.8653	4.8998	5.0339	4.9322	4.9642	4.9594	4.9761	4.9764	4.98	4.9818	pos_493	metab_492	289.18	3.4135	pos	-	-	-	-	-	0.00643617
metab_493	-	-	-	4.5039	5.12	4.4228	3.9782	4.3406	4.0996	4.0474	4.4111	4.2785	4.4106	4.3128	3.5692	4.1377	3.8852	4.2348	4.5531	3.8506	4.5869	4.5059	4.4488	4.6059	4.4945	4.4171	4.5526	4.4318	4.3581	4.3574	4.3595	pos_494	metab_493	573.313	3.4135	pos	-	-	-	-	-	0.0881216
metab_494	-	-	-	4.0222	3.9526	4.471	3.7852	4.0288	3.8972	3.8326	4.0588	4.2407	4.0462	4.0896	4.9496	4.1586	4.7606	4.1058	4.0936	4.1027	4.8165	5.9874	5.4586	4.1433	5.0734	4.2637	5.8336	4.9632	4.9655	4.9641	4.9662	pos_495	metab_494	401.169	3.4359	pos	-	-	-	-	-	0.00311476
metab_495	-	-	-	4.5301	4.5394	4.5532	4.4302	4.4891	4.3528	4.5058	4.2831	4.5411	4.4742	4.3647	5.3399	5.3347	5.0005	5.0471	5.2194	5.2682	5.303	5.2466	5.2593	5.3023	5.3268	5.3344	5.3028	5.0067	5.0128	5.0044	5.0128	pos_496	metab_495	314.109	0.6653	pos	-	-	-	-	-	0.00986681
metab_496	-	-	-	5.1332	5.1539	4.6007	4.0572	5.0445	4.9485	4.9922	4.6106	4.9743	5.2818	4.6278	4.7225	4.8227	4.6988	4.6551	4.6796	4.778	4.6545	4.7413	4.8157	4.8997	4.7219	4.7917	4.7762	4.8537	4.8451	4.8522	4.8302	pos_497	metab_496	536.297	3.4802	pos	-	-	-	-	-	0.0245182
metab_497	-	-	-	5.0546	4.9043	4.9313	4.7965	5.0476	4.9865	4.9101	4.8863	5.1303	5.1422	4.8195	4.9461	4.9283	4.9196	4.9358	4.9063	4.9682	4.8879	4.8858	4.898	4.9478	4.9354	4.938	4.9643	4.938	4.9382	4.9442	4.9535	pos_498	metab_497	211.133	3.5251	pos	-	-	-	-	-	0.0168258
metab_498	-	-	-	3.9149	3.2862	3.55	4.0944	5.7363	5.6468	5.6221	5.242	5.3303	5.9256	5.6529	5.1984	5.22	5.3032	5.2359	5.0698	4.9733	5.1826	5.0486	5.3077	1.9735	1.946	5.1148	5.1615	5.2934	5.2899	5.289	5.3045	pos_499	metab_498	502.231	3.5251	pos	-	-	-	-	-	0.0165394
metab_499	-	-	-	5.7443	4.9836	5.4106	5.7395	5.6875	5.6526	5.5402	5.323	5.8248	5.7605	5.7293	5.8489	5.757	5.7092	5.7598	5.5794	5.7817	5.441	5.3647	5.4166	5.5187	5.7657	5.7291	5.6612	5.6386	5.6499	5.659	5.6446	pos_500	metab_499	395.96	0.4927	pos	-	-	-	-	-	0.0199517
metab_500	-	-	-	4.3924	4.3979	3.903	3.2603	4.2468	4.2289	4.3784	4.0296	4.4066	4.5124	3.9837	4.1083	3.8253	3.8736	3.7288	4.0152	4.1457	4.0087	4.1491	4.1	4.1725	4.1259	4.1097	4.0455	4.1553	4.1556	4.1938	4.157	pos_501	metab_500	369.181	3.4802	pos	-	-	-	-	-	0.0446325
metab_501	-	-	-	4.4676	4.3453	4.5002	4.3257	4.4695	4.5017	4.4682	4.2559	4.6082	4.5292	4.2588	4.3895	4.3079	4.382	4.3246	4.3287	4.4649	4.3119	4.2796	4.3048	4.3899	4.3732	4.4493	4.3688	4.3764	4.3902	4.3856	4.392	pos_502	metab_501	189.127	3.592	pos	-	-	-	-	-	0.0159486
metab_502	-	-	-	4.9447	4.9017	4.9004	4.5899	4.8515	4.8529	4.7494	4.8183	4.9771	4.9404	4.77	5.0978	5.1693	5.0301	5.0397	5.0367	5.0606	5.068	5.0302	4.9933	5.0605	5.0241	5.029	5.0275	4.9226	4.9439	4.9488	4.9505	pos_503	metab_502	239.139	0.9149	pos	-	-	-	-	-	0.029296
metab_503	-	-	-	5.8247	5.8048	5.693	5.5486	5.7868	5.7285	5.6364	5.7272	6.0262	5.8639	5.7259	6.2213	6.3445	6.1383	6.1572	6.173	6.1339	6.1627	6.1454	6.0569	6.1429	6.1756	6.1885	6.0816	5.9825	5.9826	5.9898	5.9917	pos_504	metab_503	257.113	0.9149	pos	-	-	-	-	-	0.0110255
metab_504	-	-	-	4.5573	4.6375	4.3778	4.1396	4.5398	4.4097	4.501	4.4264	4.7291	4.6132	4.5691	4.9131	4.9334	4.8807	4.9232	4.8823	4.901	4.8733	4.9421	4.8434	4.8768	4.854	4.9166	4.8607	4.7159	4.7161	4.7212	4.7337	pos_505	metab_504	262.155	0.9149	pos	-	-	-	-	-	0.0193912
metab_505	-	-	-	4.0554	3.3211	4.5425	4.0544	2.5068	2.8168	2.4272	2.4139	2.5339	2.9745	3.2002	3.7434	2.7855	3.9116	2.5518	2.916	2.9626	3.6602	4.2852	4.7222	3.5948	4.1835	2.9156	4.7849	3.8539	3.8773	3.8768	3.8709	pos_506	metab_505	427.184	3.6364	pos	-	-	-	-	-	0.0249185
metab_506	-	-	-	5.2362	5.2868	5.0772	4.3454	4.8232	4.8174	4.6351	4.9107	5.1404	4.8414	4.8158	5.5758	5.5973	5.6083	5.6221	5.5872	5.7125	5.6749	5.5574	5.6201	5.5385	5.4548	5.5692	5.5254	5.3858	5.3751	5.3895	5.3914	pos_507	metab_506	276.09	0.9149	pos	-	-	-	-	-	0.0167103
metab_507	-	-	-	3.5128	3.9433	4.994	5.1018	4.1063	3.9313	3.181	3.4727	2.748	2.8893	3.0137	3.9627	2.9513	3.9629	3.8479	4.0005	4.1173	3.8575	4.3766	3.8407	3.995	3.8272	3.9306	4.1023	4.1348	4.1444	4.1443	4.1154	pos_508	metab_507	518.263	3.6586	pos	-	-	-	-	-	0.0310509
metab_508	-	-	-	4.8816	4.5596	4.539	4.6126	4.9065	4.8588	4.8369	4.7097	4.9999	4.8991	4.8696	5.7693	5.6638	5.6581	5.6353	5.5495	5.6125	5.7931	4.9515	5.8612	5.0682	4.7697	6.0452	5.9091	5.4444	5.443	5.4481	5.4519	pos_509	metab_508	177.055	3.6808	pos	-	-	-	-	-	0.00927004
metab_509	-	-	-	4.4024	4.4013	4.2869	4.1466	4.4025	4.3123	4.2335	4.2423	4.4087	4.3559	4.355	4.8963	4.5763	4.6997	4.4575	4.816	4.9533	4.7671	4.6682	4.8555	4.8509	4.6545	4.8633	4.7699	4.591	4.596	4.5968	4.5987	pos_510	metab_509	315.195	3.6808	pos	-	-	-	-	-	0.00757862
metab_510	-	-	-	3.8781	3.9745	3.7515	3.6277	4.5111	4.2464	4.4011	4.0244	4.5691	4.2648	4.2535	4.3557	4.2211	4.4494	4.1522	3.8019	4.5531	4.4597	4.4267	4.5182	3.9461	3.9052	4.6617	4.6979	4.2766	4.2768	4.2865	4.3053	pos_511	metab_510	403.163	3.7253	pos	-	-	-	-	-	0.0313579
8,11,14-Nonadecatriynoic acid	-	LMFA01030502	C19H26O2	4.6788	4.6822	4.5609	4.4039	4.5984	4.5322	4.5618	4.5067	4.6116	4.6543	4.6157	4.8119	4.839	4.778	4.7695	4.8148	4.8624	4.862	4.7677	4.7507	4.8671	4.8022	4.8452	4.8684	4.713	4.7132	4.713	4.7289	pos_512	metab_511	269.19	3.6808	pos	M+H-H2O, M+H, M+H-2H2O	50.1	-	0.0596628	-	0.0183573
metab_512	-	-	-	2.3971	2.6404	2.6469	2.2513	4.1247	4.1374	4.0386	4.0814	4.2504	4.2271	4.3121	3.9078	4.0678	4.2255	4.2408	4.3508	4.4585	4.4046	4.319	4.2484	4.4035	4.1458	4.2916	4.3255	4.0542	4.0456	4.0542	4.0345	pos_513	metab_512	472.244	3.6586	pos	-	-	-	-	-	0.0213738
metab_513	-	-	-	5.1198	4.7769	4.5249	4.9314	4.6596	4.2676	4.7171	5.4742	5.3633	4.5719	4.7617	4.4847	4.6503	5.3317	5.0641	5.8295	5.9268	5.9691	5.0395	5.6879	5.9091	5.8825	5.9207	5.9681	5.4738	5.4724	5.4736	5.4676	pos_514	metab_513	462.267	3.6586	pos	-	-	-	-	-	0.00659725
metab_514	-	-	-	4.8575	4.9776	4.8196	4.6288	4.6958	4.6188	4.5709	4.7022	4.8177	4.6334	4.8072	4.3116	4.6322	4.5078	4.7698	4.9041	4.5486	5.0372	4.9573	4.9435	5.0997	4.9666	4.887	5.0238	4.8081	4.8081	4.808	4.7875	pos_515	metab_514	418.255	3.6586	pos	-	-	-	-	-	0.0233698
metab_515	-	-	-	4.1708	4.1094	4.3248	4.4457	4.2368	4.1979	3.7723	3.8003	3.9278	4.4131	3.7887	4.045	4.0138	3.9853	4.0201	3.9478	3.9492	4.0482	3.9734	4.1015	4.2719	4.2059	4.0343	4.1406	4.0717	4.0719	4.0687	4.0535	pos_516	metab_515	351.086	3.8144	pos	-	-	-	-	-	0.0199608
metab_516	-	-	-	4.7236	3.8007	5.0396	3.5191	4.3364	4.1511	4.5469	4.1411	3.9437	3.9093	4.4965	5.138	5.1517	4.7159	4.7169	5.2243	4.88	3.9595	4.5455	3.8163	3.8635	3.9115	3.878	4.1177	4.5651	4.6008	4.6004	4.6022	pos_517	metab_516	364.21	3.6586	pos	-	-	-	-	-	0.0406645
metab_517	-	-	-	4.4606	4.0904	4.1236	4.1731	4.7501	4.5985	4.6096	4.4521	4.8153	4.7156	4.6454	4.9074	4.8758	4.8601	4.8512	4.7086	4.791	4.6479	4.7024	4.5677	4.4641	4.7282	4.804	4.7455	4.596	4.6436	4.6435	4.6451	pos_518	metab_517	369.225	3.8366	pos	-	-	-	-	-	0.0537816
metab_518	-	-	-	4.2806	2.2206	4.1402	3.3141	4.6597	1.7229	2.7722	2.5223	2.6562	3.6586	4.2483	4.6354	4.9568	4.7428	4.8305	4.7753	4.769	4.8833	4.6493	4.7243	3.7971	3.6878	4.6746	4.7683	4.4189	4.4304	4.4302	4.3756	pos_519	metab_518	571.399	3.8366	pos	-	-	-	-	-	0.0582558
metab_519	-	-	-	5.6913	2.708	5.4713	4.9923	5.8201	5.2111	4.0053	4.7457	5.2597	5.2694	5.6513	5.9217	6.1492	6.0411	6.0255	6.0754	6.0509	6.057	5.9221	5.9289	5.5251	5.4881	5.935	6.0592	5.7484	5.7618	5.7614	5.7591	pos_520	metab_519	421.346	3.8366	pos	-	-	-	-	-	0.0143614
metab_520	-	-	-	4.9718	4.8315	4.855	4.703	4.9082	4.8945	4.8149	4.9077	5.0131	5.0338	4.9374	4.8322	4.8873	4.7916	4.8969	4.8329	4.8076	4.9128	4.9207	4.9952	5.0443	4.8703	5.0862	5.0337	4.8881	4.8988	4.8879	4.8926	pos_521	metab_520	417.154	3.8589	pos	-	-	-	-	-	0.0117889
metab_521	-	-	-	5.3639	5.2317	5.1306	5.2063	5.2232	5.2514	5.2119	5.2319	5.3166	5.2746	5.37	5.5784	5.6296	5.4817	5.5184	5.5431	5.5667	5.3471	5.33	5.333	5.3852	5.2585	5.3708	5.3631	5.2872	5.3108	5.3144	5.3163	pos_522	metab_521	296.099	0.9149	pos	-	-	-	-	-	0.0306346
metab_522	-	-	-	4.3107	4.2349	4.2398	4.1318	4.3399	4.2724	4.2737	4.1317	4.3636	4.405	4.2424	4.0353	4.0482	4.0702	4.0565	4.0167	4.1361	3.9776	3.9541	4.0961	4.1151	4.0901	4.1228	4.1167	4.1702	4.1773	4.1761	4.182	pos_523	metab_522	179.107	3.9253	pos	-	-	-	-	-	0.0111701
metab_523	-	-	-	5.0551	4.9984	4.9173	4.6261	5.042	4.8461	4.9187	5.0253	5.0296	5.0128	4.9119	5.4911	5.5617	5.5037	5.5312	5.5209	5.459	5.5083	5.4879	5.442	5.5166	5.4827	5.5209	5.4965	5.2867	5.2911	5.2867	5.3062	pos_524	metab_523	324.192	0.9149	pos	-	-	-	-	-	0.0215337
metab_524	-	-	-	4.9642	4.8811	4.9224	4.7772	4.764	4.5952	4.604	4.8329	4.8099	4.7853	4.8146	5.6414	5.7152	5.2354	5.3241	5.5969	5.6023	5.6216	5.6126	5.5601	5.5833	5.6549	5.6143	5.5775	5.311	5.2939	5.3216	5.323	pos_525	metab_524	314.11	0.9149	pos	-	-	-	-	-	0.0305959
metab_525	-	-	-	4.5258	4.3821	4.3546	4.6908	4.3064	4.3239	4.3192	4.3408	4.4454	4.5134	4.2231	5.168	5.2776	4.7829	4.853	5.1282	5.0271	5.1189	4.9137	4.9863	4.9529	5.0392	5.029	5.0248	4.7836	4.7865	4.8103	4.806	pos_526	metab_525	275.124	0.9149	pos	-	-	-	-	-	0.0311282
metab_526	-	-	-	4.4381	4.5436	4.4043	4.4008	4.4799	4.3804	4.3071	4.301	4.2598	4.5426	4.3986	3.6452	3.7982	3.5984	3.5467	3.6143	3.8305	3.838	3.7929	3.8764	4.038	3.9086	3.782	4.0001	4.2661	4.266	4.2211	4.2548	pos_527	metab_526	457.327	3.9919	pos	-	-	-	-	-	0.0479997
metab_527	-	-	-	5.0497	4.8196	4.8335	4.7691	4.7974	4.7145	4.6346	4.8029	4.8949	4.8742	4.7885	4.9018	4.9492	4.7372	4.753	4.8403	4.7916	4.9432	4.9806	4.8239	4.8958	5.064	4.8605	4.8211	4.8534	4.8539	4.8739	4.8755	pos_528	metab_527	271.165	0.9149	pos	-	-	-	-	-	0.028009
metab_528	-	-	-	4.7514	4.6327	4.5337	4.6826	4.601	4.635	4.633	4.6679	4.7583	4.4887	4.5064	3.9327	3.8793	3.646	3.9273	4.0243	4.133	4.4661	4.5211	4.2734	4.4092	4.3217	4.347	4.3696	4.4755	4.4709	4.4852	4.4724	pos_529	metab_528	444.296	4.0362	pos	-	-	-	-	-	0.0149018
metab_529	-	-	-	4.9341	4.8392	4.722	4.5898	4.781	4.7882	4.7668	4.7345	4.8882	4.945	4.8179	5.3073	5.3335	5.2652	5.2683	5.2276	5.2949	5.2695	5.2273	5.1362	5.3045	5.2172	5.273	5.2405	5.0837	5.084	5.0891	5.0909	pos_530	metab_529	253.118	0.9327	pos	-	-	-	-	-	0.00833996
metab_530	-	-	-	5.5224	5.4091	5.4582	5.3912	5.3197	5.3792	5.3305	5.3239	5.5073	5.3326	5.3334	4.8847	4.923	4.8384	4.9242	4.9225	4.9305	5.2506	5.3237	5.2344	5.2635	5.267	5.1578	5.2325	5.2766	5.267	5.265	5.2669	pos_531	metab_530	426.285	4.1029	pos	-	-	-	-	-	0.0121195
metab_531	-	-	-	4.6954	4.5024	4.5472	4.0905	4.5901	4.5077	4.4863	4.5921	4.8607	4.6509	4.4682	4.8389	4.9053	4.7618	4.8546	4.7962	4.7942	4.8028	4.8324	4.6993	4.93	4.7677	4.6844	4.7705	4.6917	4.692	4.6839	4.6857	pos_532	metab_531	310.176	0.9327	pos	-	-	-	-	-	0.00952606
metab_532	-	-	-	5.3239	5.2231	4.6021	4.1612	5.2888	5.2027	5.2138	5.2015	5.1337	5.1388	5.2165	5.4238	5.3691	5.517	5.382	5.5232	5.5061	5.4609	5.4923	5.6056	5.5182	5.4432	5.6924	5.5743	5.3518	5.3469	5.3375	5.3391	pos_533	metab_532	511.289	4.0806	pos	-	-	-	-	-	0.0154568
metab_533	-	-	-	5.0789	5.0047	4.8673	4.7937	4.9592	4.8731	4.9362	4.9196	5.1971	5.0088	4.8792	5.2175	5.1886	5.0925	5.1626	5.1353	5.2502	5.1891	5.2592	5.2287	5.1901	5.1524	5.1797	5.1073	5.0504	5.0507	5.0728	5.0615	pos_534	metab_533	261.144	0.9149	pos	-	-	-	-	-	0.02457
metab_534	-	-	-	5.4812	5.4789	5.3386	5.0523	5.5615	5.4643	5.2929	5.3948	5.528	5.6369	5.3119	5.539	5.5548	5.48	5.522	5.4826	5.5405	5.4538	5.4506	5.4571	5.416	5.4956	5.5119	5.4385	5.4361	5.4364	5.4576	5.4566	pos_535	metab_534	255.134	0.9149	pos	-	-	-	-	-	0.0277553
metab_535	-	-	-	4.6028	4.4941	4.3901	4.3344	4.5527	4.4243	4.4304	4.3712	4.6521	4.6846	4.3415	4.9438	4.898	4.8611	4.8536	4.8284	4.8602	4.8414	4.8644	4.8272	4.8803	4.8141	4.831	4.8458	4.6699	4.6365	4.6764	4.6783	pos_536	metab_535	242.114	0.9149	pos	-	-	-	-	-	0.0440593
metab_536	-	-	-	4.9336	4.3009	4.6948	4.6168	5.2015	4.8045	4.2731	4.3279	4.6509	4.4021	4.8373	5.0774	5.369	5.2652	5.3191	5.2674	5.2438	5.2336	5.0443	5.1597	4.8594	4.876	5.2463	5.225	4.9609	4.962	4.9443	4.9464	pos_537	metab_536	615.39	4.192	pos	-	-	-	-	-	0.0215098
metab_537	-	-	-	5.7842	2.3112	5.569	5.4365	6.0251	5.6333	4.6837	5.2471	5.6143	5.2514	5.575	5.9596	6.1283	6.0805	6.132	6.0602	6.0391	6.064	5.9223	5.9844	5.7354	5.7304	6.1003	6.0582	5.821	5.7959	5.782	5.7901	pos_538	metab_537	439.357	4.192	pos	-	-	-	-	-	0.0392108
metab_538	-	-	-	3.9571	4.075	4.0775	3.5714	4.0391	4.0619	4.0392	4.1579	4.2047	4.1995	3.6836	4.8296	4.6811	4.7565	4.6477	4.7311	4.6242	4.6892	4.7655	4.6729	4.6925	4.7404	4.5934	4.7433	4.4247	4.426	4.4854	4.4455	pos_539	metab_538	238.119	0.9149	pos	-	-	-	-	-	0.0666295
metab_539	-	-	-	4.9181	4.6218	4.4863	4.7986	4.5617	4.3715	4.3911	4.4889	4.9656	4.6145	4.5284	5.1434	5.2522	5.2825	5.2752	5.2067	5.1703	5.2432	5.0536	5.0669	5.1624	5.0765	5.1358	5.0845	4.9309	4.9311	4.938	4.9572	pos_540	metab_539	238.071	0.9149	pos	-	-	-	-	-	0.0288198
metab_540	-	-	-	5.7204	4.975	5.4509	5.8016	5.719	5.6966	5.6332	5.3157	5.891	5.8656	5.7322	5.9059	5.8063	5.6951	5.7828	5.5807	5.8098	5.4701	5.3268	5.4308	5.5323	5.8052	5.723	5.6892	5.6584	5.6618	5.6678	5.6525	pos_541	metab_540	372.944	0.4927	pos	-	-	-	-	-	0.0147693
metab_541	-	-	-	5.6155	5.6288	5.5629	5.6869	5.6131	5.5345	5.6381	5.5472	5.6627	5.6668	5.633	5.6598	5.5684	5.6236	5.6508	5.6843	5.5184	5.6223	5.8197	5.6212	5.5817	5.6379	5.6627	5.6263	5.6228	5.6282	5.631	5.6328	pos_542	metab_541	212.201	8.6944	pos	-	-	-	-	-	0.0100353
Farnesyl acetone	-	-	C18H30O	7.2318	7.2507	7.2339	7.3057	7.2984	7.151	7.2389	7.1866	7.3244	7.294	7.2942	7.3334	7.2548	7.3146	7.3423	7.3577	7.2055	7.3063	7.4587	7.2926	7.2563	7.3223	7.3181	7.3011	7.2754	7.2726	7.2728	7.2763	pos_543	metab_542	263.237	8.6944	pos	M+H, M+NH4, M+H-H2O	82.1	-	-0.493337	-	0.00426048
metab_543	-	-	-	5.5061	5.5236	5.5025	5.59	5.5499	5.4257	5.5376	5.466	5.6031	5.5558	5.5596	5.598	5.5188	5.575	5.5968	5.6238	5.4497	5.5805	5.7562	5.5667	5.5231	5.5871	5.5949	5.5702	5.5504	5.5506	5.5503	5.5596	pos_544	metab_543	179.179	8.6944	pos	-	-	-	-	-	0.0105604
metab_544	-	-	-	5.876	5.8958	5.8451	5.9452	5.8921	5.7975	5.9091	5.8128	5.947	5.938	5.8978	5.9353	5.8613	5.9129	5.9516	5.9586	5.8053	5.9202	6.1008	5.9116	5.8668	5.9334	5.9441	5.9174	5.9053	5.9056	5.9052	5.9126	pos_545	metab_544	175.148	8.6944	pos	-	-	-	-	-	0.00835773
metab_545	-	-	-	3.9755	3.8763	4.0864	4.0781	3.0792	3.1431	3.8785	3.5255	3.8285	3.52	2.6485	4.0395	3.6705	3.7627	4.0191	4.2633	3.3269	4.9638	4.6911	5.112	4.6423	4.1434	4.4848	4.6774	4.2621	4.308	4.2726	4.2633	pos_546	metab_545	488.312	8.8184	pos	-	-	-	-	-	0.0506539
(20R,22R)-20,22-dihydroxycholesterol	C05501	LMST01010200	C27H46O3	5.2575	3.1539	4.8464	4.9421	4.6818	4.6311	3.9741	4.8102	5.2746	5.4584	4.2404	2.8856	3.5302	3.4302	3.5891	2.3259	2.3401	3.4846	3.1231	3.9341	4.2081	4.5918	4.5259	4.1377	4.6334	4.6354	4.615	4.6367	pos_547	metab_546	401.341	8.8627	pos	M+H-H2O, M+Na, M+H-2H2O	50.6	-	0.102706	-	0.0231767
metab_547	-	-	-	5.8011	5.8211	5.7915	5.8885	5.8453	5.7258	5.8428	5.7428	5.8874	5.8687	5.8455	5.8921	5.7939	5.8656	5.8855	5.9058	5.7472	5.8752	6.0547	5.8742	5.8193	5.8674	5.8988	5.8789	5.8519	5.8512	5.8513	5.857	pos_548	metab_547	161.132	8.6944	pos	-	-	-	-	-	0.00648962
metab_548	-	-	-	4.9089	4.8376	4.8491	4.8665	4.8937	4.8645	4.8749	4.7586	4.9997	4.8946	4.9042	5.0031	4.9806	5.006	4.9888	4.992	5.0037	5.0018	4.9749	4.9519	4.9582	5.0208	4.9562	4.9937	4.9398	4.9353	4.9041	4.9437	pos_549	metab_548	338.341	8.9068	pos	-	-	-	-	-	0.0408644
metab_549	-	-	-	4.4372	3.6971	4.6439	4.8624	3.7481	3.7804	4.4806	4.2025	3.9018	4.0586	4.6205	0.7618	1.5097	1.8893	0.7699	0.7576	0.7694	0.7558	0.7311	2.647	1.0355	2.7283	0.7752	2.7576	3.9777	4.0326	3.9778	3.991	pos_550	metab_549	468.309	8.929	pos	-	-	-	-	-	0.0613153
3,4-Dimethyl-5-pentyl-2-furanpentadecanoic acid	-	HMDB0112081	C26H46O3	1.3567	4.9398	6.1807	5.5373	3.3053	5.1475	4.5327	5.5764	3.3492	1.6164	4.8848	0.4135	0.4126	0.4163	0.4195	0.4103	0.4191	0.409	0.3909	0.4091	0.424	0.4068	0.4235	0.4192	5.0681	5.0527	5.0524	5.0541	pos_551	metab_550	407.352	8.9513	pos	M+H-2H2O, M+H-H2O, M+H	-	72.9	-0.737924	116627-42-0	0.0175755
metab_551	-	-	-	5.9123	5.8677	5.8358	5.8523	5.9241	5.8308	5.8404	5.8206	5.9156	5.949	5.8934	5.9568	5.9511	5.9603	5.9518	5.9437	5.9331	5.9122	5.9633	5.8887	5.8752	5.9386	5.9282	5.8962	5.9289	5.8832	5.8807	5.8826	pos_552	metab_551	284.286	9.0708	pos	-	-	-	-	-	0.0553171
metab_552	-	-	-	7.7271	7.6851	7.6617	7.6857	7.7434	7.6647	7.6587	7.6379	7.7665	7.7658	7.7354	7.755	7.7671	7.772	7.7799	7.7575	7.7533	7.7448	7.781	7.7148	7.7082	7.7667	7.7604	7.7265	7.7214	7.7171	7.7123	7.712	pos_553	metab_552	282.279	9.0708	pos	-	-	-	-	-	0.0103525
metab_553	-	-	-	5.6643	5.6536	5.6051	5.6396	5.6763	5.588	5.6138	5.5681	5.7333	5.712	5.697	5.7249	5.7242	5.7347	5.6865	5.6989	5.6952	5.6804	5.747	5.6786	5.6725	5.7229	5.6974	5.7076	5.6755	5.6519	5.6471	5.6631	pos_554	metab_553	240.268	9.0708	pos	-	-	-	-	-	0.0292727
metab_554	-	-	-	4.5888	4.4913	4.3971	4.3262	4.3625	4.1369	4.5463	4.1927	4.316	4.4031	4.968	3.8658	4.2745	3.9355	4.0604	4.1651	3.8678	4.6015	3.7656	4.0102	4.0889	3.9204	3.5272	4.3125	4.3407	4.3334	4.3163	4.3264	pos_555	metab_554	458.268	9.2342	pos	-	-	-	-	-	0.0238898
metab_555	-	-	-	3.372	3.2787	3.4059	3.8494	3.3266	4.1739	4.8977	4.1161	3.3537	3.3532	3.287	3.3619	3.3606	3.3666	3.3717	3.3568	3.3711	3.3547	3.3246	3.3549	3.3789	3.3511	3.3781	3.3712	3.6938	3.626	3.7128	3.6821	pos_556	metab_555	379.357	9.2554	pos	-	-	-	-	-	0.0834927
metab_556	-	-	-	3.6812	4.1534	5.3873	5.1532	4.1552	5.0984	4.8708	4.8681	3.9934	3.2434	4.0338	3.4234	3.1454	3.0276	3.2633	3.2225	3.2626	3.6632	3.3344	3.6022	3.4538	3.655	3.2445	3.5739	4.5739	4.5659	4.5612	4.5504	pos_557	metab_556	339.289	9.2554	pos	-	-	-	-	-	0.0225169
metab_557	-	-	-	4.4802	6.216	6.0928	6.4379	5.8661	6.0562	5.5999	6.6483	5.6792	2.6838	5.7667	2.193	2.1916	2.1976	2.2026	2.1878	2.202	2.1857	2.1558	2.1859	2.7516	2.1822	2.209	2.2022	5.7846	5.7854	5.7674	5.7421	pos_558	metab_557	758.445	9.2774	pos	-	-	-	-	-	0.0460189
metab_558	-	-	-	5.0491	4.6334	4.786	4.6262	4.2946	4.421	4.6763	4.5054	4.2995	4.5798	5.5555	3.2135	2.8605	2.7867	3.11	2.9477	3.0249	3.1946	3.3153	3.8775	3.1079	4.0786	2.8986	3.8804	4.5499	4.5504	4.5498	4.5675	pos_559	metab_558	426.295	9.3656	pos	-	-	-	-	-	0.0203594
metab_559	-	-	-	3.2094	4.9512	5.4873	6.0888	5.4312	6.0077	5.6204	5.3748	4.9875	3.6192	4.7112	3.399	3.7817	2.7244	2.5459	3.0172	2.9092	2.915	3.0873	3.4735	3.0755	3.7892	3.4155	3.3862	5.225	5.1944	5.1915	5.1936	pos_560	metab_559	489.358	9.3881	pos	-	-	-	-	-	0.0374353
metab_560	-	-	-	4.1493	4.7381	5.5827	6.5576	5.8286	6.3564	5.8934	5.6161	5.4294	3.7919	4.8468	2.9664	3.6241	3.9726	3.5098	3.5483	3.7529	3.5445	3.62	3.0835	3.7408	3.4161	3.9845	3.4904	5.6033	5.6039	5.5897	5.5783	pos_561	metab_560	691.403	9.3881	pos	-	-	-	-	-	0.0280501
metab_561	-	-	-	3.5433	4.554	5.7978	5.6898	5.4414	6.04	5.9556	5.5153	4.8698	3.8288	4.9215	3.1735	3.427	3.4705	3.2016	3.1124	3.3156	3.3506	3.3196	3.7421	3.5543	3.687	3.2552	3.3231	5.3218	5.3078	5.296	5.2978	pos_562	metab_561	547.361	9.4105	pos	-	-	-	-	-	0.0274399
metab_562	-	-	-	1.0133	0.0087	2.5225	5.5869	0.9498	4.3253	4.8812	2.5932	3.1664	0.0103	3.0353	2.2112	1.4375	2.8989	2.5627	2.5604	0.0107	0.0103	0.1666	0.0103	0.0109	2.2391	2.4244	0.0107	4.4241	4.4222	4.4167	4.4106	pos_563	metab_562	499.303	9.433	pos	-	-	-	-	-	0.01389
metab_563	-	-	-	2.8987	5.1284	5.275	5.1007	4.1858	5.0551	4.9737	5.2208	3.6205	0.7947	3.8442	2.4746	2.0716	0.806	2.4629	2.4432	0.8098	2.9979	2.1156	0.7961	2.5379	2.1042	1.5047	2.0642	4.5959	4.5838	4.5964	4.5676	pos_564	metab_563	451.339	9.4553	pos	-	-	-	-	-	0.0309107
metab_564	-	-	-	5.2139	4.1793	5.3153	5.1203	3.887	4.2115	4.2353	5.1156	4.7934	4.4445	5.8563	2.4115	2.2791	2.5972	3.5225	3.1999	2.9786	3.6516	3.635	4.0764	3.5361	4.1462	2.8095	3.9021	4.8444	4.8317	4.8257	4.8273	pos_565	metab_564	474.296	9.4778	pos	-	-	-	-	-	0.0196945
metab_565	-	-	-	3.8564	3.7927	3.7748	3.3863	3.8598	3.7035	3.6278	3.7093	3.8449	3.9648	3.8626	3.7916	3.952	3.8633	3.8446	3.7803	3.7987	3.673	3.811	3.6275	3.7547	3.8639	3.7849	3.6215	3.7872	3.772	3.7871	3.7889	pos_566	metab_565	143.126	9.5654	pos	-	-	-	-	-	0.0180878
metab_566	-	-	-	6.0735	5.1149	4.9535	5.9352	5.662	5.3664	5.3499	5.8526	5.5972	5.5586	5.4541	4.2221	4.7581	4.2173	4.4569	4.8706	4.7909	4.5256	4.3518	4.7276	5.7067	5.7051	4.6353	4.8669	5.445	5.4603	5.4547	5.4465	pos_567	metab_566	569.366	9.5858	pos	-	-	-	-	-	0.0165625
metab_567	-	-	-	1.8231	3.9516	3.9141	6.191	1.6726	4.9249	5.3659	4.3097	2.8255	1.8441	1.6729	2.0222	1.5962	2.0311	1.8712	1.7301	1.9339	2.1062	2.0747	1.8241	1.9312	1.8881	1.8834	2.1373	4.9166	4.9166	4.9101	4.8811	pos_568	metab_567	513.319	9.6295	pos	-	-	-	-	-	0.0382979
metab_568	-	-	-	4.2746	5.7712	5.7292	5.6207	5.6559	5.6828	4.894	6.1226	4.9963	3.9229	5.2452	2.3157	2.3143	2.3203	2.3253	2.3105	2.3247	3.0201	2.2784	2.7096	3.0846	2.8409	2.3317	2.3249	5.2459	5.246	5.2472	5.1816	pos_569	metab_568	760.461	9.6517	pos	-	-	-	-	-	0.0718001
metab_569	-	-	-	5.4089	4.9904	5.0885	5.0402	4.568	4.498	4.9764	4.9139	4.7622	4.9118	4.7087	5.0717	5.1573	5.1635	5.2313	5.3183	4.9226	5.6915	5.6527	5.6191	5.6046	5.3675	5.409	5.5219	5.2328	5.2311	5.2221	5.2241	pos_570	metab_569	516.342	9.8062	pos	-	-	-	-	-	0.0120451
metab_570	-	-	-	4.7282	4.3098	4.3489	4.5766	4.2074	4.3837	4.2288	4.2911	4.074	4.1652	5.0888	3.0615	3.2336	3.1332	3.1261	3.0607	2.9703	3.5893	3.3651	3.4559	3.4017	3.8364	3.1708	3.649	4.258	4.2545	4.258	4.2554	pos_571	metab_570	442.327	9.8503	pos	-	-	-	-	-	0.00410087
metab_571	-	-	-	1.329	5.7614	5.7211	5.4696	5.2775	5.8615	5.6874	5.7786	3.3759	0.1943	4.6307	1.1644	1.3189	1.0139	1.4301	0.2934	1.1631	1.5725	0.5741	1.868	1.1016	1.0426	1.3332	0.4225	5.3886	5.3893	5.3727	5.3412	pos_572	metab_571	841.651	9.9399	pos	-	-	-	-	-	0.0508703
metab_572	-	-	-	4.3305	3.6699	3.8089	4.7718	3.0332	3.9265	4.3935	3.6638	3.0194	3.5395	3.7611	3.7521	3.7691	3.537	3.8516	3.7789	2.7766	4.335	4.3651	4.279	4.1158	3.9363	3.872	4.1405	4.1114	4.1058	4.0833	4.113	pos_573	metab_572	518.358	9.8727	pos	-	-	-	-	-	0.0311757
metab_573	-	-	-	3.5959	3.1258	2.573	5.7814	3.4681	4.8384	5.337	3.6706	3.9417	3.5872	3.5639	3.5599	3.5277	3.7349	3.7035	3.5058	3.4063	3.7079	3.6106	3.6766	3.8106	3.8023	3.5967	3.3618	4.8325	4.8327	4.82	4.8277	pos_574	metab_573	501.358	9.9832	pos	-	-	-	-	-	0.0136808
metab_574	-	-	-	5.5871	6.2449	6.3846	6.506	5.9386	6.1745	6.3378	6.6311	5.4279	5.3528	5.8712	4.9716	4.9961	4.9938	4.9315	4.9099	4.937	4.9111	4.8801	4.8932	4.8849	5.0316	4.9144	4.9587	6.2235	6.2238	6.2187	6.2136	pos_575	metab_574	469.327	10.0045	pos	-	-	-	-	-	0.011068
metab_575	-	-	-	5.5958	5.4572	5.2558	5.1092	5.4228	5.3782	5.3948	5.1911	5.566	5.6941	5.6122	5.5305	5.6375	5.6471	5.71	5.5764	5.5183	5.7107	5.6134	5.6315	5.6747	5.6926	5.6428	5.4175	5.2518	5.2989	5.2394	5.241	pos_576	metab_575	675.423	10.027	pos	-	-	-	-	-	0.0661324
metab_576	-	-	-	4.2848	4.36	4.2815	4.5267	4.2798	4.4638	3.2298	3.9887	3.6769	4.443	3.6393	3.3537	3.3971	2.4982	3.4808	3.5559	2.6192	4.1407	2.8819	3.1989	3.9313	4.1949	3.4043	4.0353	4.0035	4.025	4.0324	4.0344	pos_577	metab_576	425.339	10.2278	pos	-	-	-	-	-	0.0321828
metab_577	-	-	-	5.1294	5.1575	4.9626	4.9272	5.0834	5.0904	5.1187	5.2027	5.1315	5.2865	5.1588	5.0976	5.2058	5.2211	5.2641	5.1146	5.0454	5.2536	5.1221	5.2368	5.2414	5.2823	5.1751	4.9538	4.9118	4.9104	4.9123	4.8845	pos_578	metab_577	703.455	10.3175	pos	-	-	-	-	-	0.0307086
metab_578	-	-	-	3.3719	4.1898	4.4455	6.1345	4.4285	5.7203	5.7107	4.7935	4.6211	3.2431	4.3042	3.3122	3.5442	3.5253	3.3933	3.4998	2.597	3.4965	3.3971	3.554	3.6719	3.5394	3.4562	2.8345	5.5268	5.5174	5.5104	5.5121	pos_579	metab_578	475.342	9.9832	pos	-	-	-	-	-	0.0170661
metab_579	-	-	-	3.2655	5.6685	5.5134	5.0479	4.8091	5.4395	5.1334	5.5728	3.2626	2.7956	4.5872	2.8834	2.6482	2.6436	2.3519	2.7523	2.6423	2.898	2.7288	2.7053	3.0058	3.0479	2.5396	2.7869	4.8799	4.8731	4.8681	4.8715	pos_580	metab_579	395.352	10.139	pos	-	-	-	-	-	0.0114626
metab_580	-	-	-	5.1007	4.3671	4.5129	5.2503	4.5728	4.6434	5.2384	4.1995	4.9091	4.8933	4.7763	4.8086	4.8935	4.8542	4.9178	4.847	4.6671	5.2188	5.0445	5.347	5.2707	5.2921	5.0715	5.1741	4.9372	4.9443	4.9291	4.9384	pos_581	metab_580	548.296	9.7185	pos	-	-	-	-	-	0.0143917
metab_581	-	-	-	2.174	5.3684	5.5336	5.7414	4.6414	5.301	5.4887	5.7125	4.0871	2.9176	4.635	2.164	2.1626	2.1685	2.1736	2.1588	2.173	2.1567	2.1268	2.1569	2.1808	2.1532	2.18	2.1732	5.2462	5.237	5.2367	5.2436	pos_582	metab_581	329.32	9.9832	pos	-	-	-	-	-	0.0109789
metab_582	-	-	-	3.6047	4.6543	4.746	5.08	3.9448	4.7318	5.1142	4.8713	4.0319	3.3772	3.6159	2.8751	3.0562	2.9366	2.968	2.8951	2.6485	2.9934	3.1322	2.7612	2.7662	2.9621	3.0845	2.1422	4.3803	4.4	4.3923	4.4098	pos_583	metab_582	419.35	9.6295	pos	-	-	-	-	-	0.0286436
metab_583	-	-	-	4.9768	4.997	4.9817	4.8703	5.0237	5.0135	4.9746	4.9594	4.9851	5.0505	4.9597	4.9631	5.0539	4.975	4.9559	4.9262	4.9361	4.8762	5.0055	4.8425	4.9113	4.9883	4.9542	4.8553	4.9479	4.9438	4.9526	4.9571	pos_584	metab_583	268.263	9.5654	pos	-	-	-	-	-	0.013207
metab_584	-	-	-	5.6438	5.9387	5.2872	5.7761	5.3134	4.8145	4.9015	5.7113	5.383	5.1613	5.6584	3.2435	2.2467	3.7126	3.8504	3.8631	2.6775	4.5534	4.0635	3.901	4.1158	4.5491	3.7386	4.136	5.2288	5.256	5.2198	5.2216	pos_585	metab_584	608.502	10.7657	pos	-	-	-	-	-	0.0392054
metab_585	-	-	-	4.3755	4.554	4.2591	4.3618	4.2802	4.3062	4.1698	4.2654	4.1411	4.3376	4.4133	4.3507	4.6847	4.4577	4.2949	4.5244	4.3559	4.2446	4.3685	4.2101	4.2781	4.5443	4.408	4.7677	4.5885	4.6086	4.597	4.658	pos_586	metab_585	541.121	10.8548	pos	-	-	-	-	-	0.0736548
metab_586	-	-	-	5.7488	5.7789	5.559	5.9514	5.7219	5.2601	5.5264	5.3485	5.2372	5.2023	5.6486	5.0966	4.5831	4.9562	5.186	5.2352	4.9874	5.4321	5.4203	5.1189	4.8331	5.1032	4.6106	5.2329	5.4203	5.4209	5.4122	5.4139	pos_587	metab_586	584.502	10.8773	pos	-	-	-	-	-	0.0102046
metab_587	-	-	-	5.4551	5.3761	5.3411	5.4204	5.3563	5.4059	5.444	5.2858	5.5159	5.4401	5.4656	5.6512	5.6835	5.7089	5.6595	5.6089	5.6584	5.6025	5.5812	5.5534	5.5473	5.6388	5.6051	5.5943	5.4787	5.4961	5.4861	5.4934	pos_588	metab_587	525.392	10.8104	pos	-	-	-	-	-	0.0179072
metab_588	-	-	-	6.7469	6.7234	6.7154	6.5605	6.8006	6.7028	6.6621	6.669	6.7637	6.8266	6.7433	6.7321	6.8243	6.7556	6.749	6.7254	6.7128	6.6595	6.7771	6.6148	6.6915	6.7592	6.7426	6.653	6.6988	6.6905	6.6995	6.7014	pos_589	metab_588	310.31	9.5654	pos	-	-	-	-	-	0.0110201
metab_589	-	-	-	5.1891	5.1919	5.164	4.9988	5.2442	5.1643	5.1247	5.1412	5.2328	5.2571	5.1849	5.1871	5.277	5.2035	5.1933	5.1684	5.1594	5.0949	5.2285	5.064	5.153	5.2174	5.1802	5.0966	5.1615	5.1521	5.1596	5.1632	pos_590	metab_589	254.248	9.5654	pos	-	-	-	-	-	0.0112202
metab_590	-	-	-	5.2059	5.1876	5.1552	5.0062	5.2551	5.1546	5.1462	5.1052	5.2367	5.2801	5.1913	5.2013	5.2932	5.2022	5.2162	5.1728	5.1659	5.1113	5.2501	5.0724	5.1423	5.2249	5.203	5.1165	5.1656	5.1567	5.1624	5.1673	pos_591	metab_590	240.232	9.5654	pos	-	-	-	-	-	0.0107454
metab_591	-	-	-	5.3114	5.3567	5.5342	5.0602	5.4418	5.2171	5.555	5.5476	5.6411	5.186	5.7242	5.0266	5.0464	5.0817	5.299	5.3918	5.4926	5.8152	5.5535	5.6403	5.3117	5.5186	5.4233	5.5028	5.4744	5.4746	5.4741	5.4462	pos_592	metab_591	560.502	11.3025	pos	-	-	-	-	-	0.0319162
metab_592	-	-	-	3.584	4.7817	4.8796	5.3043	4.6364	5.1323	5.1621	5.2452	3.4752	3.6496	3.5626	3.8148	4.1608	2.5636	3.0236	3.223	3.0851	3.7106	3.6573	3.8959	3.6093	3.9245	3.4016	3.5306	4.6521	4.6369	4.599	4.6256	pos_593	metab_592	469.329	9.5003	pos	-	-	-	-	-	0.0510993
metab_593	-	-	-	5.648	4.9958	4.8212	4.9068	4.8192	4.7143	5.1487	4.7813	4.526	5.0996	6.14	2.9849	2.6774	2.7373	2.9404	3.7026	3.4878	4.0491	3.7354	4.8053	3.8762	4.6479	3.2843	4.7941	5.0129	5.0125	5.0152	5.023	pos_594	metab_593	440.311	9.5003	pos	-	-	-	-	-	0.0112952
metab_594	-	-	-	2.0338	5.8493	5.0792	5.335	4.6947	5.3735	5.5139	5.1775	3.7316	2.0152	4.8464	2.0238	2.0225	2.0284	2.0334	2.0187	2.0329	2.0166	1.9868	2.0168	2.0407	2.0131	2.0398	2.033	5.014	5.0172	5.0062	5.0187	pos_595	metab_594	417.297	9.4105	pos	-	-	-	-	-	0.0127473
metab_595	-	-	-	4.2472	4.6512	4.6322	4.5606	4.34	4.1322	4.1481	4.7342	4.2382	4.3211	4.608	3.5126	3.5844	3.7847	3.5361	3.5696	3.5802	3.5434	3.3909	4.1988	3.6522	3.8936	3.7326	3.8063	4.1747	4.1466	4.1461	4.1547	pos_596	metab_595	531.402	9.3881	pos	-	-	-	-	-	0.0312124
metab_596	-	-	-	4.4205	3.5794	3.9035	3.784	3.1024	3.03	3.2509	3.6832	3.2171	3.7233	3.3053	4.1369	3.8313	3.7492	3.8292	4.0411	3.4734	4.6893	4.6199	4.7415	4.4324	4.1687	4.0379	4.344	4.0893	4.0368	4.0253	4.0281	pos_597	metab_596	516.343	9.3881	pos	-	-	-	-	-	0.0713436
metab_597	-	-	-	5.0488	4.5569	4.7712	4.6757	3.9798	3.6583	4.3911	4.1596	4.2473	4.2166	4.6202	4.4844	4.5316	4.4495	4.6199	4.5902	4.0452	5.2044	5.0062	5.2346	4.923	4.5331	4.8301	4.7423	4.7148	4.7338	4.7183	4.6792	pos_598	metab_597	490.327	9.3656	pos	-	-	-	-	-	0.0523082
metab_598	-	-	-	3.4382	3.3586	4.1298	5.8488	3.1562	4.6766	5.2543	4.2616	3.4008	3.4058	4.3348	1.0297	0.2941	0.5188	0.1303	0.9612	0.6751	2.8313	2.6979	3.6526	2.1249	1.5111	2.369	3.2448	4.7299	4.725	4.7219	4.7237	pos_599	metab_598	473.288	9.3656	pos	-	-	-	-	-	0.00792368
metab_599	-	-	-	5.064	4.6301	4.8669	4.6867	4.4148	4.1711	5.069	4.7844	4.5711	4.6233	4.0846	5.1027	4.879	4.8907	4.961	5.2087	4.8942	5.5381	5.5172	5.5537	5.4433	5.1112	5.1041	5.2937	5.0498	5.05	5.0445	5.0463	pos_600	metab_599	514.328	9.3432	pos	-	-	-	-	-	0.00627461
metab_600	-	-	-	5.0931	4.9855	4.8419	5.0341	4.9445	5.006	4.8598	4.7472	5.0549	4.923	4.9922	5.0301	5.0799	5.0148	5.1197	5.0464	5.1323	5.0244	5.0565	5.0739	4.9766	5.1734	5.0903	5.0164	4.9463	4.9175	4.9363	4.9477	pos_601	metab_600	188.077	13.9917	pos	-	-	-	-	-	0.0316616
metab_601	-	-	-	5.7431	5.7321	5.7479	5.6805	5.7057	5.6912	5.7128	5.6149	5.8816	5.7726	5.8644	5.9608	5.736	5.8055	5.834	5.9015	5.924	5.9178	5.9459	5.9277	5.7591	5.9015	5.8863	5.9322	5.727	5.7288	5.7415	5.7662	pos_602	metab_601	145.017	14.0115	pos	-	-	-	-	-	0.0422172
metab_602	-	-	-	4.9453	4.9268	4.989	4.8516	5.0072	4.987	4.9709	4.8517	5.0243	5.0048	5.0188	5.2097	5.0363	5.0682	5.0063	4.9892	5.0617	5.1785	5.1997	5.1333	5.0322	5.0083	5.1068	5.2146	5.023	5.0245	5.042	5.0433	pos_603	metab_602	200.975	14.0115	pos	-	-	-	-	-	0.0251867
metab_603	-	-	-	4.9718	4.8597	4.9679	4.8708	5.0186	4.9189	4.9601	4.8373	5.1129	4.9814	5.1237	5.1767	5.0548	5.1104	5.0256	4.8876	4.8857	5.1855	5.1824	5.189	5.0382	4.9086	5.0793	5.2163	4.9946	4.9965	5.0106	5.0239	pos_604	metab_603	288.007	14.0115	pos	-	-	-	-	-	0.0315889
metab_604	-	-	-	5.5764	5.5989	5.4948	5.501	5.2234	5.5496	5.2911	5.1514	5.7034	5.3771	5.6427	5.6184	5.3967	5.4018	5.6766	5.7221	5.7545	5.5977	5.6731	5.7274	5.3361	5.7613	5.7418	5.7042	5.3378	5.3539	5.3721	5.3903	pos_605	metab_604	257.977	14.0115	pos	-	-	-	-	-	0.0522907
metab_605	-	-	-	5.5412	5.4925	5.4525	5.4615	5.5417	5.4608	5.5095	5.4242	5.5863	5.6161	5.5346	5.6347	5.6583	5.6833	5.646	5.6099	5.6282	5.6451	5.6126	5.6013	5.6343	5.6185	5.6037	5.615	5.5701	5.578	5.5776	5.5722	pos_606	metab_605	218.106	14.0115	pos	-	-	-	-	-	0.00899427
metab_606	-	-	-	5.8179	5.7768	5.8283	5.6942	5.7846	5.7109	5.7388	5.6747	5.9122	5.8396	5.9468	6.0054	5.8368	5.8532	5.8477	5.9777	5.9494	6.0369	6.0475	6.0327	5.8733	5.9315	5.9078	6.0024	5.8118	5.8137	5.8282	5.8296	pos_607	metab_606	214.917	14.0115	pos	-	-	-	-	-	0.021545
metab_607	-	-	-	4.8789	4.7996	4.7949	4.8071	4.8337	4.7533	4.7695	4.7147	4.8915	4.8515	4.8497	4.8963	4.9069	4.9524	4.9057	4.8667	4.8622	4.8808	4.879	4.8625	4.8591	4.8955	4.8816	4.8826	4.8512	4.8389	4.8487	4.8406	pos_608	metab_607	109.989	14.0655	pos	-	-	-	-	-	0.013874
metab_608	-	-	-	5.0996	5.0121	5.0145	5.0632	5.0531	4.9874	5.0657	4.8962	5.1628	5.0486	5.0901	5.1769	5.1474	5.1992	5.1463	5.1238	5.1451	5.1312	5.1338	5.1164	5.1196	5.1652	5.1349	5.1275	5.0866	5.0827	5.0929	5.0933	pos_609	metab_608	155.003	14.0851	pos	-	-	-	-	-	0.0117672
metab_609	-	-	-	5.015	4.9443	4.9412	4.967	4.9607	4.8792	4.8813	4.8761	4.97	4.9866	4.9282	4.9974	5.0082	4.9832	5.0069	4.992	4.9829	4.9888	4.9304	5.0074	5.0306	4.9797	5.033	5.0229	4.993	4.9581	4.9617	4.9556	pos_610	metab_609	287.889	14.0851	pos	-	-	-	-	-	0.040858
metab_610	-	-	-	5.4005	5.3116	5.3164	5.3442	5.3286	5.3	5.325	5.2369	5.4217	5.3881	5.3712	5.445	5.486	5.4898	5.4512	5.4525	5.4596	5.4243	5.4133	5.4181	5.4131	5.4564	5.4268	5.4491	5.3848	5.39	5.3861	5.3841	pos_611	metab_610	271.916	14.0477	pos	-	-	-	-	-	0.00607551
metab_611	-	-	-	5.1189	4.9948	4.9924	5.0067	5.0657	5.0138	5.034	4.9702	5.1609	5.0788	5.1082	5.1717	5.2025	5.2078	5.1747	5.1361	5.1576	5.1738	5.1399	5.1399	5.1157	5.1566	5.1318	5.1351	5.0972	5.1013	5.09	5.1005	pos_612	metab_611	243.922	14.0477	pos	-	-	-	-	-	0.0117681
metab_612	-	-	-	5.7515	5.6883	5.699	5.6719	5.7682	5.6995	5.733	5.6539	5.7833	5.8008	5.7281	5.9062	5.7622	5.8317	5.7722	5.7368	5.8313	5.864	5.864	5.7564	5.7805	5.8662	5.789	5.7849	5.7489	5.7509	5.7666	5.7658	pos_613	metab_612	175.064	14.0115	pos	-	-	-	-	-	0.0217809
metab_613	-	-	-	5.4353	5.3675	5.3724	5.305	5.3893	5.304	5.3233	5.1858	5.5101	5.4143	5.447	5.5312	5.4337	5.4236	5.4419	5.4647	5.468	5.5264	5.5028	5.5061	5.4382	5.5116	5.4664	5.4845	5.3624	5.4023	5.3893	5.4067	pos_614	metab_613	168.016	14.0115	pos	-	-	-	-	-	0.0451681
metab_614	-	-	-	6.27	6.1855	6.1556	6.1597	6.2649	6.1976	6.2251	6.1163	6.3043	6.3184	6.2371	6.3627	6.3126	6.3615	6.2692	6.2676	6.3044	6.3411	6.3215	6.2699	6.2877	6.3525	6.2799	6.2823	6.25	6.2513	6.2611	6.2629	pos_615	metab_614	158.049	14.0115	pos	-	-	-	-	-	0.0151868
metab_615	-	-	-	5.3817	5.3502	5.3718	5.412	5.1768	5.1682	5.4379	5.0688	5.5085	5.2255	5.3913	5.5025	5.4967	5.5693	5.5002	5.4805	5.4624	5.4657	5.4433	5.4735	5.4847	5.4992	5.4503	5.492	5.3875	5.3887	5.4073	5.4424	pos_616	metab_615	154.005	14.0115	pos	-	-	-	-	-	0.0601088
metab_616	-	-	-	5.5957	5.5238	5.5141	5.5231	5.5711	5.505	5.5061	5.4352	5.6237	5.6136	5.6293	5.6603	5.6282	5.6536	5.624	5.6321	5.6566	5.6423	5.6342	5.6408	5.5994	5.6605	5.6202	5.6349	5.565	5.5639	5.5635	5.5667	pos_617	metab_616	140.996	14.0115	pos	-	-	-	-	-	0.00325199
metab_617	-	-	-	6.4545	6.391	6.3836	6.2721	6.3797	6.4035	6.3315	6.2637	6.5208	6.4719	6.5089	6.5741	6.4033	6.4264	6.4728	6.567	6.5677	6.5753	6.5788	6.5791	6.4448	6.5705	6.4843	6.5435	6.3892	6.3976	6.4167	6.4339	pos_618	metab_617	125.986	14.0115	pos	-	-	-	-	-	0.0462658
metab_618	-	-	-	4.8451	4.741	4.6757	4.8069	4.7382	4.7621	4.6533	4.6053	4.8509	4.7747	4.8423	4.8865	4.8312	4.8157	4.9075	4.8193	4.9061	4.8501	4.8395	4.8424	4.772	4.9146	4.8516	4.8043	4.7339	4.7306	4.7302	4.7462	pos_619	metab_618	82.0144	14.0115	pos	-	-	-	-	-	0.0173142
metab_619	-	-	-	5.2309	5.1771	5.2085	5.1814	5.2411	5.2129	5.2557	5.1715	5.2953	5.2765	5.2419	5.4308	5.2696	5.3617	5.2926	5.2783	5.3508	5.3825	5.3817	5.3122	5.2699	5.3407	5.3241	5.3262	5.2094	5.2736	5.272	5.2744	pos_620	metab_619	115.007	14.0115	pos	-	-	-	-	-	0.0709274
metab_620	-	-	-	5.2395	5.2075	5.262	5.2042	5.0773	5.0728	5.225	4.958	5.2916	5.117	5.2264	5.3157	5.2514	5.3441	5.2718	5.2719	5.2975	5.2712	5.279	5.2758	5.3111	5.2597	5.2562	5.2985	5.2146	5.2158	5.2172	5.2693	pos_621	metab_620	112.979	14.0115	pos	-	-	-	-	-	0.0634322
metab_621	-	-	-	5.5655	5.4819	5.4996	5.4971	5.5612	5.4853	5.5494	5.4508	5.6306	5.6054	5.5657	5.6965	5.6489	5.6767	5.6205	5.626	5.6652	5.6683	5.661	5.6066	5.6174	5.6765	5.6115	5.6167	5.5626	5.5632	5.5708	5.5888	pos_622	metab_621	97.9918	14.0115	pos	-	-	-	-	-	0.0284221
metab_622	-	-	-	5.8274	5.7364	5.5623	5.7051	5.5911	5.6524	5.4592	5.3295	5.8078	5.5885	5.7101	5.6886	5.7315	5.6398	5.9053	5.8121	5.8294	5.6947	5.7425	5.7872	5.6499	5.8948	5.838	5.7333	5.5719	5.5551	5.5643	5.5744	pos_623	metab_622	258.998	13.9917	pos	-	-	-	-	-	0.019947
metab_623	-	-	-	5.4724	5.3907	5.2853	5.4492	5.2931	5.385	5.2183	5.0705	5.4646	5.2776	5.3997	5.4707	5.4048	5.3418	5.5485	5.4731	5.5469	5.403	5.4451	5.474	5.3209	5.5895	5.5299	5.4193	5.3087	5.2686	5.2979	5.3143	pos_624	metab_623	110.009	13.9917	pos	-	-	-	-	-	0.0460469
metab_624	-	-	-	3.9235	5.1858	5.3631	5.6	4.6344	5.4504	5.4815	5.3525	3.8935	3.2966	4.4393	3.423	3.4732	3.5247	3.4001	3.5274	2.5626	4.031	3.8994	4.079	3.7364	3.7167	3.7006	3.7877	4.9423	4.9822	4.9722	4.9795	pos_625	metab_624	443.312	9.3432	pos	-	-	-	-	-	0.0414359
metab_625	-	-	-	2.1777	4.4714	4.5521	5.1554	3.1615	4.4629	4.5997	4.5914	2.1429	2.3091	3.6059	2.151	2.1497	2.1556	2.1607	2.1459	2.1601	2.1438	2.1139	2.144	2.1679	2.1402	2.167	2.1602	4.0922	4.0929	4.0555	4.0874	pos_626	metab_625	363.326	9.3217	pos	-	-	-	-	-	0.0402812
metab_626	-	-	-	5.6809	5.7564	5.3381	5.7015	6.006	5.4379	5.862	5.4828	5.2347	5.5898	5.4923	5.2292	5.1434	4.8338	5.1814	5.271	5.418	5.8463	5.7255	6.1691	5.6387	5.3104	5.7873	5.7101	5.6378	5.6381	5.6313	5.6173	pos_627	metab_626	513.34	9.2774	pos	-	-	-	-	-	0.0222822
Geranylgeraniol	C09094	LMPR0104010009	C20H34O	4.9577	4.9607	4.9294	4.8949	5.0275	4.897	4.9088	4.9186	5.0613	5.032	5.0276	4.9786	5.0214	4.9807	5.0198	4.9957	4.9807	4.9113	5.0952	4.9039	4.9409	5.0317	4.9955	4.9102	4.9893	4.9851	4.9662	4.9911	pos_628	metab_627	291.268	9.2554	pos	M+H, M+NH4, M+H-H2O	55.4	-	-0.303007	-	0.0260583
metab_628	-	-	-	4.6731	6.5746	6.4786	6.6542	6.5204	6.6982	6.1605	6.6923	5.9635	4.3359	6.0581	2.3155	1.9926	1.9985	2.0036	2.6448	2.003	3.1571	3.2472	3.0432	3.6767	4.0821	2.7441	2.2951	6.1432	6.1442	6.1268	6.127	pos_629	metab_628	732.429	9.2342	pos	-	-	-	-	-	0.0223527
metab_629	-	-	-	5.724	5.3064	5.4497	5.4409	5.3757	5.1136	5.3563	5.2713	5.6217	5.4256	5.6143	4.9998	5.0108	5.0837	5.001	5.0939	5.213	5.3542	5.2365	5.4548	5.0756	5.2601	5.1124	5.5185	5.3906	5.4133	5.4042	5.4115	pos_630	metab_629	375.227	9.2342	pos	-	-	-	-	-	0.0235633
Nerolidol	C09704	LMPR0103010005;HMDB0035662	C15H26O	6.0969	6.057	6.0394	6.0653	6.13	6.024	6.0593	6.0089	6.159	6.1448	6.1182	6.1538	6.1472	6.1408	6.1431	6.1394	6.1333	6.1055	6.1807	6.1007	6.0906	6.1582	6.1455	6.1174	6.0995	6.0973	6.1009	6.0988	pos_631	metab_630	240.232	9.0708	pos	M+H-H2O, M+H, M+NH4	75.5	-	0.0479638	7212-44-4	0.00345268
8E,10E-Tetradecadienal	-	LMFA06000173	C14H24O	6.3345	6.3054	6.2737	6.3011	6.3446	6.2654	6.3015	6.2347	6.4095	6.3784	6.3591	6.3903	6.3952	6.3847	6.3851	6.3653	6.3731	6.3657	6.4275	6.3429	6.3287	6.3984	6.386	6.3618	6.3345	6.3314	6.3344	6.333	pos_632	metab_631	226.216	9.0708	pos	M+H-H2O, M+NH4, M+H	61.6	-	-0.0151179	-	0.00332103
metab_632	-	-	-	6.36	6.3321	6.3077	6.3324	6.3871	6.2808	6.3315	6.2542	6.4395	6.3971	6.3753	6.4208	6.4104	6.4116	6.3991	6.395	6.3811	6.3846	6.4481	6.3645	6.3509	6.4224	6.4101	6.3888	6.3632	6.3588	6.3616	6.3603	pos_633	metab_632	212.201	9.0708	pos	-	-	-	-	-	0.0042899
8E,10E-Dodecadienal	-	LMFA06000155	C12H20O	6.3882	6.3628	6.3351	6.3577	6.422	6.3188	6.375	6.3002	6.4767	6.4375	6.4079	6.456	6.4427	6.4495	6.4355	6.428	6.4215	6.4226	6.4987	6.3954	6.3901	6.4615	6.4429	6.4269	6.4001	6.3871	6.3984	6.4018	pos_634	metab_633	198.185	9.0708	pos	M+H-H2O, M+NH4, M+H	58.7	-	-0.134998	-	0.0152464
5-Isopropylbicyclo[3.1.0]hexan-2-one	-	HMDB0035229	C9H14O	6.4215	6.4071	6.3737	6.4058	6.4583	6.3541	6.4201	6.3421	6.5239	6.4812	6.4499	6.5055	6.4837	6.4845	6.472	6.4717	6.4533	6.4612	6.54	6.4439	6.4313	6.5002	6.4849	6.4685	6.4421	6.4346	6.442	6.4439	pos_635	metab_634	156.138	9.0708	pos	M+H-H2O, M+H, M+NH4	66.3	-	1.27684	513-20-2	0.00943422
2,6,6-Trimethyl-1-cyclohexen-1-acetaldehyde	-	HMDB0032540	C11H18O	6.4489	6.4287	6.4076	6.4234	6.4874	6.3931	6.436	6.3676	6.5472	6.4997	6.4794	6.5294	6.5056	6.51	6.4987	6.4952	6.4796	6.482	6.5606	6.4665	6.4602	6.5233	6.5106	6.4877	6.4644	6.4598	6.4642	6.4661	pos_636	metab_635	149.132	9.0708	pos	M+H-H2O, M+NH4, M+H	68.6	-	0.348918	472-66-2	0.0061813
metab_636	-	-	-	6.3356	6.3117	6.2902	6.3096	6.3737	6.2676	6.325	6.2523	6.4382	6.3878	6.3702	6.4095	6.3935	6.3976	6.3941	6.3846	6.3652	6.3707	6.4524	6.3541	6.3426	6.4103	6.4036	6.3771	6.3506	6.3447	6.3523	6.3542	pos_637	metab_636	142.123	9.0708	pos	-	-	-	-	-	0.00940729
(1R,4R)-Dihydrocarvone	C11398	LMPR0102090033	C10H16O	6.475	6.4599	6.4347	6.4573	6.508	6.414	6.4649	6.3954	6.5699	6.5281	6.5026	6.5483	6.5373	6.5377	6.532	6.5138	6.5099	6.5095	6.5858	6.4938	6.4804	6.546	6.5346	6.5127	6.4933	6.4886	6.4911	6.4941	pos_638	metab_637	135.117	9.0708	pos	M+H-H2O, M+NH4, M+H	89.2	-	0.44572	-	0.00562789
3-Methyl-2-cyclohexen-1-one	-	HMDB0031541	C7H10O	6.3201	6.3065	6.2758	6.3069	6.3651	6.2592	6.3142	6.2495	6.4243	6.3778	6.3575	6.3992	6.3805	6.3901	6.3824	6.3718	6.3485	6.3587	6.4381	6.3372	6.3378	6.4043	6.3825	6.3603	6.3372	6.3359	6.3395	6.3411	pos_639	metab_638	128.107	9.0708	pos	M+H, M+NH4, M+H-H2O	60.8	-	2.50943	1193-18-6	0.00538131
metab_639	-	-	-	5.3841	5.3559	5.3339	5.3805	5.4219	5.3238	5.3442	5.3327	5.4404	5.4419	5.4151	5.424	5.4461	5.4385	5.4422	5.4395	5.3926	5.4037	5.4746	5.3784	5.3882	5.4518	5.4318	5.3879	5.4145	5.3928	5.387	5.3832	pos_640	metab_639	125.133	9.0708	pos	-	-	-	-	-	0.0325449
metab_640	-	-	-	2.9966	4.9744	5.6962	5.5145	4.6648	5.6908	5.7419	5.7421	4.3343	2.3551	4.3245	2.3637	2.3624	2.3683	2.5234	2.3586	2.3728	2.3565	3.0711	3.9336	2.3807	2.353	2.3798	3.5306	5.1051	5.1058	5.1232	5.1108	pos_641	metab_640	365.266	8.9733	pos	-	-	-	-	-	0.019339
metab_641	-	-	-	3.4322	4.6373	4.8252	5.1872	2.7247	4.5203	3.6601	5.1753	3.3114	2.4722	3.5472	3.1556	2.4795	2.4855	2.4905	2.9997	2.8804	2.4736	2.7494	2.4738	3.1206	2.6554	2.7428	2.4901	4.2097	4.2288	4.1932	4.1825	pos_642	metab_641	387.326	8.929	pos	-	-	-	-	-	0.0467154
2-Methyl-1,3-cyclohexadiene	-	HMDB0032395	C7H10	5.2879	5.2967	5.2658	5.2922	5.3341	5.2525	5.3084	5.2811	5.3841	5.3744	5.3269	5.3501	5.3311	5.3513	5.3628	5.3477	5.3181	5.3276	5.3959	5.2941	5.3027	5.348	5.345	5.3306	5.3197	5.3091	5.3088	5.3106	pos_643	metab_642	95.086	9.0708	pos	M+H, M+NH4, M+CH3OH+H	53.4	-	4.53357	1489-57-2	0.0119218
metab_643	-	-	-	4.782	4.8262	4.8082	5.0117	5.0414	4.7072	5.1469	4.8694	4.6919	5.348	4.9952	4.6918	4.6054	4.1197	4.5344	3.9567	5.1059	4.0179	4.1298	3.9205	5.2719	4.4067	4.3832	4.1016	4.8029	4.7928	4.7924	4.7943	pos_644	metab_643	463.243	8.9068	pos	-	-	-	-	-	0.0114024
metab_644	-	-	-	3.9608	4.5038	4.4108	3.9748	3.5905	4.45	4.6243	4.0325	3.0894	2.7983	2.7321	3.3313	3.9714	4.1837	3.7686	3.9916	3.6743	3.3681	2.7697	2.8	3.6788	3.596	3.494	3.0345	3.7796	3.7805	3.7562	3.722	pos_645	metab_644	461.36	8.9068	pos	-	-	-	-	-	0.0620386
metab_645	-	-	-	1.3159	2.7385	5.2142	5.345	4.2304	4.9601	4.8325	3.9046	4.0411	1.4291	3.9757	0.5169	0.7934	0.9097	1.5522	1.7793	0.6622	1.0223	0.501	2.058	0.8592	1.121	3.149	3.1456	4.3827	4.3748	4.3454	4.3615	pos_646	metab_645	461.326	8.9068	pos	-	-	-	-	-	0.0374713
metab_646	-	-	-	3.6101	3.581	3.5575	3.6603	3.6364	3.439	3.5406	3.7989	3.6366	3.8855	3.7153	3.6695	3.7258	3.7086	3.5824	3.7214	3.6393	3.7114	3.6612	3.582	3.7464	3.6844	3.6059	3.6774	3.7154	3.6538	3.6798	3.6112	pos_647	metab_646	234.882	0.0124	pos	-	-	-	-	-	0.100413
metab_647	-	-	-	4.7939	4.706	4.6846	4.7305	4.7763	4.7113	4.6597	4.8721	4.7588	4.9238	4.8747	4.7885	4.8136	4.8687	4.8503	4.7679	4.8723	4.8125	4.7209	4.7494	4.8045	4.7902	4.7804	4.764	4.7482	4.7322	4.7413	4.7276	pos_648	metab_647	97.9692	0.0124	pos	-	-	-	-	-	0.0212536
metab_648	-	-	-	2.6197	2.6679	2.38	2.6906	2.5002	2.3859	2.7077	2.7612	2.7254	2.9721	2.6213	2.8136	2.5251	2.7388	2.6162	2.7294	2.8706	2.633	2.5298	2.8114	2.5681	2.5943	2.8031	2.8033	2.6719	2.5517	2.5202	2.5849	pos_649	metab_648	110.954	0.0124	pos	-	-	-	-	-	0.156795
metab_649	-	-	-	4.4129	4.3026	4.3129	4.3469	4.3332	4.3095	4.2812	4.4561	4.3657	4.5096	4.4331	4.3788	4.4136	4.4602	4.4076	4.3729	4.4046	4.4433	4.383	4.3997	4.4383	4.4048	4.3822	4.415	4.3843	4.3461	4.3578	4.344	pos_650	metab_649	236.878	0.0124	pos	-	-	-	-	-	0.043238
metab_650	-	-	-	4.6351	4.5351	4.5095	4.5606	4.5358	4.5042	4.522	4.4851	4.6362	4.5831	4.5981	4.6832	4.6761	4.6845	4.6674	4.6262	4.6439	4.7174	4.6154	4.6607	4.6615	4.686	4.6876	4.6591	4.592	4.5724	4.5994	4.5868	pos_651	metab_650	231.899	0.0124	pos	-	-	-	-	-	0.0261388
metab_651	-	-	-	4.5407	4.4428	4.3841	4.4595	4.4423	4.419	4.4396	4.5284	4.5123	4.6214	4.5751	4.5426	4.5767	4.548	4.5114	4.5117	4.5543	4.5286	4.4744	4.545	4.5895	4.5499	4.59	4.5062	4.5038	4.4826	4.4817	4.4835	pos_652	metab_651	208.883	0.0124	pos	-	-	-	-	-	0.0246884
metab_652	-	-	-	3.7017	3.5761	3.5196	3.664	3.6186	3.4526	3.5475	3.6734	3.5674	3.7209	3.7199	3.6261	3.6465	3.7033	3.6188	3.6952	3.753	3.7402	3.5618	3.6141	3.62	3.6604	3.6256	3.6643	3.5906	3.599	3.5842	3.5859	pos_653	metab_652	102.948	0.0124	pos	-	-	-	-	-	0.0153315
metab_653	-	-	-	3.7698	3.6723	3.6352	3.7299	3.7007	3.5327	3.6104	3.816	3.6758	3.8559	3.8339	3.784	3.7208	3.8518	3.7511	3.7221	3.8371	3.782	3.7305	3.7012	3.7505	3.7049	3.6845	3.7143	3.7095	3.7083	3.6931	3.6935	pos_654	metab_653	99.9484	0.0124	pos	-	-	-	-	-	0.0208084
metab_654	-	-	-	4.7892	4.6988	4.6811	4.6795	4.7749	4.7232	4.7112	4.3972	4.8227	4.737	4.7258	4.9139	4.7978	4.8001	4.8111	4.8046	4.7858	4.8206	4.7923	4.7768	4.8531	4.8372	4.8713	4.814	4.7722	4.7728	4.7907	4.7922	pos_655	metab_654	259.894	0.0124	pos	-	-	-	-	-	0.025318
metab_655	-	-	-	4.0183	3.9181	3.9298	3.9469	3.9878	3.9184	3.9163	4.0388	4.0114	4.1158	4.0828	4.0215	4.0603	4.0694	4.031	4.0176	4.028	4.0646	3.9619	3.9748	4.0267	4.0244	4.0048	4.0168	3.9534	3.9444	3.95	3.9429	pos_656	metab_655	95.9738	0.0175	pos	-	-	-	-	-	0.011328
metab_656	-	-	-	4.491	4.4514	4.4171	4.4625	4.4603	4.393	4.4465	4.4125	4.5476	4.4982	4.4752	4.5762	4.5596	4.5894	4.5598	4.5306	4.574	4.5868	4.5094	4.5526	4.5311	4.5625	4.5464	4.5566	4.4863	4.491	4.4862	4.4892	pos_657	metab_656	111.985	0.0175	pos	-	-	-	-	-	0.00541106
metab_657	-	-	-	4.0686	4.0202	4.0342	4.0409	3.9222	3.898	3.9906	3.9365	4.0717	4.0516	4.0091	4.1177	4.1683	4.1436	4.1463	4.049	4.1065	4.1139	4.0692	4.1276	4.1455	4.0734	4.0841	4.1375	4.0386	4.0604	4.0212	4.0451	pos_658	metab_657	129.959	0.0175	pos	-	-	-	-	-	0.0373115
metab_658	-	-	-	3.7491	3.3362	3.5827	3.7392	3.6785	3.6794	3.4882	3.5794	3.8038	3.7869	3.9741	3.8193	3.9134	3.6906	3.8108	3.7924	3.7784	3.6406	3.2942	3.6475	3.5988	3.7282	3.769	3.5134	3.5966	3.6978	3.5502	3.5681	pos_659	metab_658	92.0433	0.4749	pos	-	-	-	-	-	0.160206
metab_659	-	-	-	4.627	4.1404	4.4093	4.5662	4.5527	4.5786	4.4364	4.2871	4.6895	4.605	4.6293	4.7482	4.6486	4.6283	4.7013	4.6072	4.7142	4.5178	4.417	4.4866	4.5525	4.6922	4.6511	4.6007	4.5643	4.5371	4.5563	4.5658	pos_660	metab_659	142.071	0.4927	pos	-	-	-	-	-	0.0300375
metab_660	-	-	-	5.7466	5.0619	5.4871	5.8561	5.7241	5.7209	5.6536	5.3715	5.8862	5.858	5.7479	5.8849	5.7965	5.6731	5.7441	5.574	5.8078	5.4768	5.3266	5.491	5.5394	5.8297	5.7276	5.7283	5.6831	5.6621	5.6829	5.681	pos_661	metab_660	240.953	0.4927	pos	-	-	-	-	-	0.0231026
metab_661	-	-	-	6.4011	5.7704	6.1361	6.5038	6.4098	6.373	6.2673	6.1495	6.4873	6.5295	6.4518	6.5651	6.4875	6.4447	6.4675	6.2729	6.4917	6.2119	6.0607	6.1671	6.2298	6.446	6.3916	6.3505	6.3448	6.3451	6.3447	6.3261	pos_662	metab_661	218.984	0.4927	pos	-	-	-	-	-	0.0213305
metab_662	-	-	-	4.7535	4.2517	4.544	4.7416	4.7061	4.6502	4.6927	4.4552	4.8529	4.7856	4.7632	4.9358	4.837	4.7525	4.8115	4.721	4.8118	4.6694	4.5446	4.593	4.7313	4.8474	4.8182	4.7868	4.7216	4.7304	4.7356	4.7397	pos_663	metab_662	140.056	0.4927	pos	-	-	-	-	-	0.0178546
metab_663	-	-	-	5.827	5.5202	5.6626	5.6368	5.5879	5.6546	5.6205	5.427	5.5489	5.6836	5.8335	5.4255	5.2725	5.2631	5.3112	5.2474	5.5483	5.3807	5.4238	5.362	5.365	5.395	5.4672	5.2521	5.5449	5.5529	5.5476	5.5452	pos_664	metab_663	112.112	0.4927	pos	-	-	-	-	-	0.00860484
metab_664	-	-	-	5.3483	4.9283	5.1493	5.3679	5.3284	5.2948	5.1714	5.2105	5.3517	5.4531	5.3967	5.4325	5.4179	5.3817	5.3906	5.268	5.3876	5.2062	5.0912	5.1842	5.2442	5.3552	5.3128	5.2669	5.2666	5.2645	5.2554	5.2569	pos_665	metab_664	105.004	0.4927	pos	-	-	-	-	-	0.012772
metab_665	-	-	-	4.6926	4.3669	4.5695	4.8025	4.7422	4.6874	4.5957	4.4932	4.7777	4.8312	4.78	4.8465	4.8321	4.8043	4.8091	4.6967	4.8231	4.6399	4.5594	4.6161	4.6755	4.7831	4.7162	4.7162	4.6736	4.6638	4.6555	4.6572	pos_666	metab_665	91.5429	0.4927	pos	-	-	-	-	-	0.0190126
metab_666	-	-	-	4.5841	4.4721	4.4789	4.5319	4.5972	4.5511	4.5512	4.254	4.6926	4.5431	4.5726	4.7455	4.6107	4.6083	4.6441	4.6195	4.619	4.6502	4.6664	4.6071	4.6495	4.6758	4.6563	4.6913	4.5922	4.5927	4.6009	4.6027	pos_667	metab_666	140.996	0.0175	pos	-	-	-	-	-	0.0125648
metab_667	-	-	-	3.6454	3.5085	3.4964	3.5457	3.5666	3.5197	3.5322	3.3432	3.6497	3.5106	3.5528	3.7775	3.7466	3.6828	3.7101	3.6466	3.6656	3.6548	3.551	3.644	3.5908	3.6526	3.7015	3.7279	3.5301	3.5343	3.548	3.5318	pos_668	metab_667	153.998	0.0175	pos	-	-	-	-	-	0.0189172
metab_668	-	-	-	3.9486	3.9257	3.8579	3.9163	3.9844	3.9031	3.8837	3.8774	4.0566	3.9921	3.9707	4.0819	4.0478	4.0928	4.0188	4.0363	4.02	4.0267	3.9606	4.033	3.9818	4.0545	4.0089	4.0367	3.9627	3.9554	3.967	3.9681	pos_669	metab_668	172.005	0.0175	pos	-	-	-	-	-	0.0132655
metab_669	-	-	-	4.6161	4.5295	4.5202	4.5618	4.6214	4.532	4.5946	4.408	4.7163	4.6017	4.588	4.7619	4.655	4.6962	4.6982	4.6449	4.6833	4.6892	4.6739	4.6616	4.6774	4.7039	4.7162	4.7137	4.6079	4.6311	4.624	4.6372	pos_670	metab_669	174.021	0.0175	pos	-	-	-	-	-	0.0288571
metab_670	-	-	-	4.6807	4.5731	4.5678	4.6304	4.6757	4.594	4.6248	4.3641	4.765	4.6292	4.6321	4.7892	4.6888	4.7141	4.7484	4.6919	4.7225	4.737	4.7401	4.6986	4.6926	4.7599	4.7171	4.7412	4.673	4.6405	4.6676	4.6763	pos_671	metab_670	172.956	0.0175	pos	-	-	-	-	-	0.0368994
metab_671	-	-	-	5.1561	5.0523	5.0468	5.0811	5.1336	5.0584	5.0821	4.8499	5.2052	5.106	5.0972	5.2503	5.1883	5.1913	5.2035	5.1696	5.1828	5.2075	5.1697	5.1621	5.1725	5.2018	5.1916	5.2131	5.1274	5.1341	5.135	5.1376	pos_672	metab_671	152.995	0.0175	pos	-	-	-	-	-	0.0100034
metab_672	-	-	-	4.8008	4.7009	4.6999	4.7587	4.7972	4.7259	4.7622	4.4819	4.8657	4.7546	4.7695	4.9088	4.8582	4.8516	4.8707	4.8257	4.8495	4.8654	4.8494	4.8176	4.8393	4.8424	4.8566	4.8819	4.7801	4.7804	4.7838	4.7936	pos_673	metab_672	178.991	0.022	pos	-	-	-	-	-	0.0146247
metab_673	-	-	-	4.5384	4.4978	4.4803	4.5185	4.5183	4.5272	4.42	4.5872	4.6259	4.622	4.5965	4.6029	4.6582	4.6132	4.6614	4.5594	4.5808	4.599	4.5644	4.5495	4.6209	4.5708	4.5739	4.5584	4.5609	4.5339	4.5329	4.5346	pos_674	metab_673	159.969	0.022	pos	-	-	-	-	-	0.0317491
metab_674	-	-	-	4.8807	4.7877	4.7548	4.8151	4.866	4.8085	4.8244	4.7688	4.9378	4.914	4.9147	4.9639	4.9314	4.9499	4.9616	4.9302	4.9622	4.9435	4.9042	4.9036	4.8843	4.9425	4.9348	4.9194	4.8463	4.8567	4.8563	4.8564	pos_675	metab_674	126.972	0.0175	pos	-	-	-	-	-	0.0117119
metab_675	-	-	-	3.8603	3.7704	3.821	3.8344	3.8244	3.8571	3.7972	3.9872	3.9257	3.9585	3.9717	3.876	3.8806	3.9371	4.0145	3.9067	3.911	3.8974	3.8998	3.9254	3.9219	3.8672	3.9035	3.8775	3.8626	3.8556	3.8532	3.8505	pos_676	metab_675	119.961	0.083	pos	-	-	-	-	-	0.011993
metab_676	-	-	-	4.1699	4.0745	4.0915	4.1123	4.1185	4.0568	4.0542	4.2014	4.1318	4.2623	4.2367	4.1755	4.2058	4.2403	4.1893	4.1475	4.2101	4.1954	4.1329	4.1735	4.1454	4.1801	4.1902	4.1378	4.1255	4.1243	4.1108	4.1171	pos_677	metab_676	118.943	0.0175	pos	-	-	-	-	-	0.0157642
metab_677	-	-	-	4.5704	4.4803	4.4816	4.4969	4.5336	4.5034	4.4316	4.4783	4.5469	4.5974	4.5901	4.5953	4.5631	4.5867	4.5909	4.552	4.572	4.5602	4.5425	4.5557	4.5518	4.5568	4.5741	4.5598	4.5242	4.5147	4.509	4.5109	pos_678	metab_677	120.024	0.1719	pos	-	-	-	-	-	0.0156934
metab_678	-	-	-	3.7802	3.7434	3.7941	3.7156	3.819	3.8214	3.7421	3.8907	3.7459	3.8442	3.8536	3.9066	3.7512	3.7912	3.9107	3.8078	3.8302	3.7865	3.8698	3.7952	3.8952	3.8605	3.8102	3.8225	3.7965	3.7609	3.7571	3.7591	pos_679	metab_678	115.98	0.0175	pos	-	-	-	-	-	0.0441644
metab_679	-	-	-	4.7416	4.6493	4.6229	4.6673	4.6983	4.6605	4.6547	4.694	4.7778	4.7845	4.7708	4.8024	4.7898	4.8125	4.7901	4.7537	4.7905	4.7778	4.7169	4.7404	4.7308	4.7728	4.7548	4.7398	4.7033	4.701	4.7046	4.6934	pos_680	metab_679	114.967	0.0175	pos	-	-	-	-	-	0.0114916
metab_680	-	-	-	4.0938	3.9947	4.0038	4.0219	4.0724	3.996	3.9744	4.065	4.084	4.1649	4.1313	4.139	4.0972	4.1649	4.1391	4.0952	4.1549	4.113	4.0584	4.0676	4.0924	4.107	4.094	4.0681	4.0523	4.0525	4.0522	4.0396	pos_681	metab_680	70.9425	0.0175	pos	-	-	-	-	-	0.0145506
metab_681	-	-	-	5.4044	4.3063	5.1002	5.5703	5.3812	5.3656	5.0952	5.0601	5.4627	5.6735	5.4439	5.4305	5.5403	5.2946	5.3694	5.1807	5.4744	4.9602	4.7474	5.0014	4.9877	5.4606	5.3091	5.2637	5.2669	5.2681	5.2684	5.1912	pos_682	metab_681	606.862	0.4927	pos	-	-	-	-	-	0.084297
metab_682	-	-	-	4.8313	4.339	4.7731	4.8207	4.8474	4.8242	4.671	4.8774	4.7828	5.0964	4.8749	5.0756	5.0298	4.992	4.9157	4.8982	5.0769	4.653	4.7013	4.6975	4.7447	4.8061	4.9782	4.7481	4.7674	4.7682	4.7488	4.7182	pos_683	metab_682	484.891	0.4927	pos	-	-	-	-	-	0.0530088
metab_683	-	-	-	4.5193	4.0728	4.3754	4.573	4.5223	4.4869	4.3981	4.394	4.6514	4.6878	4.6112	4.716	4.6248	4.591	4.6019	4.5655	4.6701	4.4829	4.4004	4.4249	4.4531	4.6285	4.5679	4.5212	4.5202	4.5485	4.5326	4.5269	pos_684	metab_683	111.012	0.5105	pos	-	-	-	-	-	0.0280598
metab_684	-	-	-	4.063	4.2906	4.0182	3.6267	4.0834	3.8699	4.0305	4.0354	4.0348	4.2215	3.9932	3.9205	3.9666	3.865	3.9544	4.0386	3.9241	4.0203	3.8625	3.94	4.0746	3.8056	3.4303	3.8922	3.9641	3.9509	3.9435	3.9454	pos_685	metab_684	105.963	0.5105	pos	-	-	-	-	-	0.0216146
metab_685	-	-	-	4.2711	3.8746	4.0735	4.2676	4.1673	4.2062	4.0875	3.9576	4.2533	4.2349	4.2369	4.4102	4.3065	4.27	4.2642	4.2062	4.3561	4.1496	4.0187	4.0797	4.1813	4.2819	4.2634	4.1616	4.2297	4.2227	4.1974	4.2315	pos_686	metab_685	147.05	0.5105	pos	-	-	-	-	-	0.0357133
metab_686	-	-	-	3.8494	4.1941	3.8696	3.029	3.7634	3.6299	3.7872	4.2005	3.2422	3.2417	3.8385	4.2541	4.0622	4.6126	4.3049	4.3976	4.2693	4.584	4.7264	4.3505	4.4246	3.6574	4.2616	3.7444	4.0672	4.0395	4.0152	4.0278	pos_687	metab_686	158.928	0.5105	pos	-	-	-	-	-	0.0516331
metab_687	-	-	-	4.504	4.4822	4.2537	4.2019	4.4287	4.361	4.4484	4.4824	4.3111	4.6745	4.4976	4.4287	4.5882	4.7069	4.5585	4.5558	4.6837	4.5993	4.6772	4.4342	4.5843	4.1893	4.3002	4.1435	4.3715	4.3352	4.392	4.3416	pos_688	metab_687	240.917	0.5105	pos	-	-	-	-	-	0.0614101
metab_688	-	-	-	5.5517	4.8937	5.2624	5.647	5.5198	5.5259	5.5178	5.0351	5.745	5.5593	5.5452	5.8123	5.6591	5.5943	5.6519	5.4889	5.6963	5.4378	5.379	5.3831	5.4518	5.6626	5.6341	5.616	5.5266	5.5532	5.5627	5.5646	pos_689	metab_688	237.021	0.5105	pos	-	-	-	-	-	0.0396053
metab_689	-	-	-	4.4315	4.322	4.2233	3.9424	4.2167	4.1941	4.3191	3.9012	4.2942	4.5518	4.304	3.9393	4.12	3.6818	4.2648	4.1524	4.2511	4.1181	3.9882	4.1181	4.2791	3.8754	3.6934	4.0597	4.1724	4.1575	4.1467	4.1868	pos_690	metab_689	263.933	0.5105	pos	-	-	-	-	-	0.0403146
metab_690	-	-	-	4.2671	3.1653	4.2065	4.3854	3.944	4.2886	3.9502	3.9128	4.5402	4.2532	4.5609	4.6675	4.6853	4.3837	4.5904	4.5349	4.5619	4.4227	4.2206	4.1527	4.306	4.5528	4.1432	4.3175	4.2395	4.2629	4.2632	4.1743	pos_691	metab_690	382.928	0.5105	pos	-	-	-	-	-	0.0928038
metab_691	-	-	-	5.0842	3.8641	4.5678	5.1973	5.0811	5.0015	4.7432	4.6564	5.171	5.327	5.2527	5.1346	5.0452	4.8837	4.9271	4.7291	4.9457	3.9047	3.8746	4.5443	4.7773	5.0592	4.7873	5.089	4.8291	4.8015	4.8214	4.7516	pos_692	metab_691	638.884	0.5105	pos	-	-	-	-	-	0.0779896
metab_692	-	-	-	4.3577	4.2903	4.3342	3.5548	4.3212	4.1595	4.3077	4.2418	4.2818	4.4344	4.5582	4.5967	4.4736	4.6393	4.4352	4.3588	4.614	4.6108	4.6153	4.5164	4.5429	4.1379	4.3938	4.459	4.4572	4.4439	4.4571	4.4562	pos_693	metab_692	411.937	0.5105	pos	-	-	-	-	-	0.0148385
metab_693	-	-	-	3.5285	3.5868	3.5057	3.5201	3.696	3.4587	3.8808	3.4562	3.6212	3.647	3.483	3.2669	2.8238	2.6289	3.2271	3.497	3.4443	3.1963	3.433	3.5143	3.2861	3.5357	3.2622	3.6785	3.5097	3.6451	3.5111	3.5331	pos_694	metab_693	169.082	0.5295	pos	-	-	-	-	-	0.158332
metab_694	-	-	-	3.8774	3.7955	3.5305	3.289	4.513	4.4526	4.9987	4.1726	4.5747	3.8781	4.5133	3.6105	3.7953	3.6919	3.7736	3.5759	3.6659	4.6361	3.4731	5.1097	5.0941	4.0047	4.6579	4.9058	4.4364	4.4655	4.4651	4.4611	pos_695	metab_694	128.144	0.5295	pos	-	-	-	-	-	0.0314846
metab_695	-	-	-	4.8649	4.9338	4.8832	4.6578	4.8911	4.7393	4.9542	4.9621	4.7375	4.7702	4.7647	4.7062	4.2209	4.5598	4.3993	4.8314	4.4876	4.8191	4.7505	4.8074	4.8009	4.8716	4.6732	4.8672	4.864	4.8362	4.8436	4.8361	pos_696	metab_695	413.021	0.5295	pos	-	-	-	-	-	0.0306431
metab_696	-	-	-	4.5154	3.9044	4.3549	3.3892	4.2465	3.7839	4.562	4.3992	4.4861	3.6311	4.0619	3.7712	4.1383	4.0077	3.6204	4.2783	3.8917	3.6034	3.9982	3.8684	3.9514	4.4669	4.2839	4.2954	4.3297	4.2398	4.3024	4.2955	pos_697	metab_696	499.006	0.5295	pos	-	-	-	-	-	0.0848082
metab_697	-	-	-	2.3947	0.0103	0.0102	1.8432	0.0115	0.0097	2.3023	2.7174	2.5232	0.0122	0.0105	0.0124	2.0854	4.1539	4.2282	4.1779	2.1293	4.1817	2.2963	4.1392	4.1329	2.8151	4.1804	3.5959	3.6258	3.6048	3.629	3.5794	pos_698	metab_697	149.011	0.5488	pos	-	-	-	-	-	0.0520582
metab_698	-	-	-	4.0465	4.6091	4.349	3.9051	3.9712	3.792	4.0713	4.3564	4.1826	4.1035	3.9223	3.3441	3.7201	3.7848	3.6856	4.1598	3.5691	4.1981	4.2823	4.2482	4.1894	4.2025	4.1778	4.0963	4.0428	4.0426	4.087	4.0443	pos_699	metab_698	225.023	0.5488	pos	-	-	-	-	-	0.0517087
metab_699	-	-	-	4.9691	5.3783	5.1064	4.824	4.857	4.7641	5.044	5.1558	5.0816	4.9682	4.874	4.3202	4.7153	4.7348	4.6941	5.0772	4.564	5.1066	5.2057	5.134	5.0714	5.0572	4.9631	5.0542	4.9464	4.9468	4.972	4.9524	pos_700	metab_699	223.025	0.5488	pos	-	-	-	-	-	0.0280703
metab_700	-	-	-	2.4685	2.3755	3.2037	3.7154	4.1373	4.3297	4.2541	4.1057	3.836	3.4423	4.2946	2.4584	3.4626	3.1757	3.9161	3.7728	2.7751	3.7409	3.3589	4.052	3.8092	3.2267	4.2863	3.535	4.0548	4.0435	4.0715	4.0469	pos_702	metab_700	281.05	0.5488	pos	-	-	-	-	-	0.0290211
metab_701	-	-	-	4.0248	4.4189	4.1906	3.6233	3.6812	3.7781	4.1117	4.1212	4.1758	3.9891	3.7838	3.3482	3.9168	4.1051	3.9309	4.1274	4.128	3.7905	3.8819	4.079	3.7212	4.2335	4.1501	4.2298	4.0354	4.0612	4.0339	4.1008	pos_703	metab_701	315.188	0.5488	pos	-	-	-	-	-	0.0734762
metab_702	-	-	-	4.0271	4.5924	4.5697	3.9061	3.7985	3.6748	3.8757	4.6692	4.5027	3.9156	3.6316	2.9443	4.1649	4.0684	4.1581	4.3515	3.411	4.367	4.4331	4.3338	4.4522	4.4502	4.4377	4.2748	4.3451	4.3294	4.3557	4.3314	pos_704	metab_702	337.005	0.5488	pos	-	-	-	-	-	0.0285771
metab_703	-	-	-	4.6243	4.1529	4.2036	4.0171	4.6332	4.4765	4.1376	4.213	4.4267	4.3726	4.4772	4.6455	4.5705	4.6926	4.6029	4.5227	4.595	4.2166	4.2661	4.2006	4.278	4.1204	4.2452	4.2065	4.4046	4.3968	4.3964	4.4069	pos_705	metab_703	350.229	0.5488	pos	-	-	-	-	-	0.0123465
metab_704	-	-	-	3.5187	3.4181	3.3441	3.0201	3.4606	3.1338	3.5792	3.2913	3.2786	3.2329	3.748	4.4038	4.4969	4.3474	4.3784	4.2763	4.3444	4.2432	4.2937	4.226	4.2242	4.0353	4.2903	4.0347	3.8376	3.8628	3.8705	3.8723	pos_706	metab_704	292.202	0.5488	pos	-	-	-	-	-	0.0362944
metab_705	-	-	-	3.1878	3.6589	3.7467	2.69	2.8759	2.8035	2.7961	3.3309	3.45	2.9759	2.8363	3.7132	3.7793	4.2687	3.127	4.1447	2.9203	4.325	4.3246	3.995	4.3232	4.2605	3.7809	4.0564	3.6105	2.8779	3.5929	3.5508	pos_707	metab_705	417.043	0.5488	pos	-	-	-	-	-	0.508232
metab_706	-	-	-	3.743	4.6679	4.5958	3.7302	3.8138	3.5689	3.8481	4.5824	4.3708	3.5923	2.9661	3.041	3.0396	3.6271	3.7754	4.1284	3.205	3.9968	4.2117	3.9599	4.1668	4.3073	4.2342	4.3105	4.2759	4.2174	4.2789	4.2811	pos_708	metab_706	437.105	0.5488	pos	-	-	-	-	-	0.0682234
metab_707	-	-	-	4.7472	3.6788	4.676	3.2288	4.6384	4.4915	3.3351	4.6695	4.4549	4.0045	3.684	4.5376	4.7482	4.9447	5.0082	4.8112	4.6806	4.4784	3.9662	4.3492	4.461	4.1798	4.6718	4.3789	4.3872	4.3567	4.3557	4.3522	pos_709	metab_707	471.219	0.5488	pos	-	-	-	-	-	0.0382402
metab_708	-	-	-	3.1826	4.3285	4.2626	3.0241	3.1371	3.0647	3.0573	4.3607	3.8529	3.1637	3.0975	3.3169	4.0136	3.8802	4.0657	4.2546	3.7704	4.0865	4.1368	3.9805	4.3054	4.1443	4.1132	4.0973	4.0091	3.9299	3.9776	3.9567	pos_710	metab_708	521.067	0.5488	pos	-	-	-	-	-	0.077288
metab_709	-	-	-	3.652	4.6013	4.5801	3.8886	3.4584	3.3673	3.702	4.6072	4.4599	3.4665	3.4002	3.4752	4.0047	4.0435	4.0918	4.2553	3.4843	4.3683	4.4423	4.3326	4.4365	4.3624	4.385	4.042	4.1983	4.1983	4.2435	4.1992	pos_711	metab_709	420.967	0.5488	pos	-	-	-	-	-	0.0530629
metab_710	-	-	-	6.1233	5.8395	6.0438	6.069	6.0181	5.8814	6.2059	6.2152	6.2263	5.9023	6.0802	5.3632	5.4564	5.5411	5.5902	5.8143	5.8751	5.8902	5.7586	5.9269	5.7411	6.0788	5.742	5.9012	5.9756	5.9884	5.9755	5.9798	pos_712	metab_710	104.107	0.57	pos	-	-	-	-	-	0.0139968
metab_711	-	-	-	4.0733	4.3039	4.1359	4.5235	5.1017	5.1129	5.283	4.7236	4.3867	4.4028	5.3179	4.2329	4.2467	4.4148	4.1789	4.2062	4.4882	4.1074	4.0703	4.1585	4.1363	4.1503	4.2381	4.218	4.6505	4.6636	4.6864	4.675	pos_713	metab_711	130.097	0.57	pos	-	-	-	-	-	0.0353798
metab_712	-	-	-	4.0611	4.4066	4.147	3.6479	3.5314	3.4816	3.8324	4.1649	4.2935	4.0964	3.7116	3.0962	4.112	3.9579	4.005	4.1314	4.0498	4.2125	4.2638	4.2446	4.2668	4.2986	4.253	4.2944	4.0933	4.0997	4.1026	4.1164	pos_714	metab_712	239.028	0.5488	pos	-	-	-	-	-	0.0225658
metab_713	-	-	-	3.4888	3.3249	3.5263	2.9488	3.4361	3.2845	3.2158	3.2417	3.3939	2.9584	3.3563	4.1467	4.3986	4.2798	4.2133	4.061	4.2895	4.1633	4.0672	4.0535	4.0995	4.1423	4.1526	3.9852	3.7256	3.7457	3.7799	3.7268	pos_715	metab_713	177.139	0.57	pos	-	-	-	-	-	0.0594694
metab_714	-	-	-	4.8852	5.0188	4.8139	3.7048	4.8696	4.8079	4.6694	4.7062	4.7343	5.0077	4.8537	5.3472	5.1665	5.4008	5.0379	5.3275	5.0436	5.3056	5.2891	5.2096	5.3034	5.2207	4.9286	5.266	4.9717	5.015	5.0045	5.0194	pos_716	metab_714	204.098	0.57	pos	-	-	-	-	-	0.048652
metab_715	-	-	-	3.7717	4.0165	4.2175	4.4272	5.1092	5.1281	5.3273	4.776	4.3851	4.379	5.3431	3.9242	3.6577	3.9457	3.5887	4.1251	4.0405	4.0848	4.2146	4.2122	4.2047	4.068	3.8379	4.1402	4.5862	4.5941	4.5732	4.6231	pos_717	metab_715	251.031	0.57	pos	-	-	-	-	-	0.0493541
metab_716	-	-	-	4.6055	4.7766	4.5363	2.9996	4.8249	4.8506	4.5976	4.7159	4.7331	4.7518	4.8919	4.9294	5.0733	5.0018	5.0122	4.7772	4.9023	4.792	4.3423	4.7604	4.8689	4.2537	4.8456	4.7685	4.6355	4.6586	4.6666	4.6687	pos_718	metab_716	288.228	0.57	pos	-	-	-	-	-	0.034504
metab_717	-	-	-	5.536	5.6177	5.3045	3.5093	5.577	5.5625	5.3092	5.3177	5.4512	5.7705	5.5418	5.5129	5.5033	5.4273	5.4711	5.4602	5.4694	5.4098	5.3186	5.2838	5.3669	5.1717	5.343	5.3992	5.3472	5.3497	5.3518	5.3654	pos_719	metab_717	302.244	0.57	pos	-	-	-	-	-	0.018936
metab_718	-	-	-	3.8267	3.9708	3.9922	3.1019	3.7492	3.7227	3.9849	4.0498	4.052	3.7412	3.786	4.4621	4.4352	4.3878	4.4716	4.6433	4.3543	4.5874	4.6371	4.6382	4.4415	4.2996	4.5163	4.6614	4.2704	4.2704	4.3138	4.2718	pos_720	metab_718	347.122	0.57	pos	-	-	-	-	-	0.0506599
metab_719	-	-	-	4.2844	3.8367	4.3875	3.4195	4.2232	3.7049	4.0041	4.4166	4.3253	4.3009	3.8266	4.6873	4.5567	4.8131	4.599	4.9986	4.6462	5.0249	4.9794	5.029	4.7637	5.0168	4.5534	5.0765	4.5505	4.4818	4.4965	4.483	pos_721	metab_719	379.099	0.57	pos	-	-	-	-	-	0.0769947
metab_720	-	-	-	3.7225	4.238	3.5221	3.6077	3.6174	3.839	2.8677	3.9453	3.1648	3.1555	3.6591	4.1717	4.5414	4.434	4.0499	4.0786	4.3674	3.9945	4.1801	4.3594	4.2677	4.4072	4.2854	3.8863	3.8195	3.9894	3.9306	3.9587	pos_722	metab_720	418.219	0.57	pos	-	-	-	-	-	0.160158
metab_721	-	-	-	5.0919	4.1699	4.4718	4.5915	4.7088	4.7238	4.1939	4.9878	5.2046	4.4023	3.847	3.5899	3.6077	3.9436	4.2594	4.3048	3.6441	4.2324	4.0512	3.9321	3.6069	3.579	4.0344	3.8721	4.4389	4.4383	4.4163	4.2277	pos_723	metab_721	543.133	0.57	pos	-	-	-	-	-	0.208088
metab_722	-	-	-	2.4814	2.3884	2.3839	2.2507	2.4361	2.3638	2.3565	2.3432	2.4631	2.4626	2.3966	3.42	3.532	3.6253	3.6069	3.4829	3.444	3.3213	3.0602	3.1758	3.555	3.1477	3.5596	3.3062	2.816	2.8117	2.8132	2.8528	pos_724	metab_722	98.0717	0.5905	pos	-	-	-	-	-	0.0463414
metab_723	-	-	-	5.4266	5.4743	5.4076	5.1198	5.42	5.3637	5.2986	5.2853	5.3821	5.5338	5.3683	5.5532	5.3842	5.6044	5.288	5.5251	5.2734	5.5185	5.4802	5.4745	5.5516	5.5023	5.1911	5.5245	5.3828	5.3851	5.3848	5.3772	pos_725	metab_723	286.14	0.5905	pos	-	-	-	-	-	0.00840527
Glutaminylhydroxyproline	-	HMDB0028798	C10H17N3O5	5.6067	5.607	5.5624	5.2238	5.5194	5.482	5.4344	5.523	5.6106	5.5983	5.5095	5.9378	5.7603	5.9443	5.7738	5.87	5.7565	5.8671	5.9064	5.856	5.9227	5.8684	5.7281	5.9402	5.6719	5.6822	5.6818	5.6837	pos_726	metab_724	301.151	0.5905	pos	M+H-H2O, M+ACN+H	-	56.1	-0.214165	-	0.0123067
metab_725	-	-	-	3.8107	4.1653	3.9694	3.983	4.1358	4.0912	3.966	3.8995	3.9934	4.3343	4.0365	4.5353	4.4862	4.6117	4.5505	4.716	4.5029	4.5395	4.2193	4.2546	4.4197	4.4539	4.3464	4.4469	4.135	4.2587	4.2878	4.2949	pos_727	metab_725	332.145	0.5905	pos	-	-	-	-	-	0.158196
metab_726	-	-	-	4.1964	4.2547	3.4822	3.4368	4.3992	4.4278	3.7493	4.0826	4.3742	4.5601	4.1047	4.4417	4.6973	4.6409	4.7148	4.535	4.6237	4.5984	4.3789	4.4743	4.572	4.5559	4.592	4.5113	4.3553	4.3912	4.3344	4.3358	pos_728	metab_726	413.251	0.5905	pos	-	-	-	-	-	0.062097
metab_727	-	-	-	4.5638	4.5191	4.4906	4.4754	4.6037	4.5474	4.5788	4.5959	4.7501	4.6617	4.5687	4.7177	4.6671	4.6944	4.6968	4.6698	4.8115	4.6583	4.7152	4.7012	4.5943	4.7037	4.672	4.6699	4.6	4.608	4.5972	4.6052	pos_729	metab_727	86.0606	0.609	pos	-	-	-	-	-	0.011259
Meglutol	C03761	-	C6H10O5	5.6289	5.2571	5.6556	5.6845	5.4915	5.4784	5.5516	5.7853	5.6332	5.4388	5.4654	5.451	5.5072	5.4201	5.5515	5.5164	5.7616	5.7318	5.7312	5.7731	5.4091	5.5147	5.4098	5.6481	5.5412	5.5573	5.555	5.5587	pos_730	metab_728	204.087	0.609	pos	M+ACN+H, 2M+H	51.5	-	0.885416	-	0.018295
metab_729	-	-	-	5.3098	5.3983	5.2927	5.0365	5.2985	5.2222	5.2107	5.2563	5.3376	5.4198	5.2497	5.9017	5.8714	5.8742	5.8477	5.8469	5.8745	5.844	5.8279	5.7706	5.8782	5.8282	5.8154	5.8388	5.6021	5.6023	5.6046	5.6103	pos_731	metab_729	274.14	0.609	pos	-	-	-	-	-	0.00886887
metab_730	-	-	-	4.5098	4.5325	4.3572	3.7955	4.5252	4.343	4.2993	4.4603	4.3313	4.4122	4.4613	4.8061	4.9834	4.9402	4.9107	4.9208	4.8777	4.9782	4.8287	4.8655	4.9784	4.813	4.9055	4.8265	4.6156	4.6312	4.6308	4.6182	pos_732	metab_730	342.202	0.609	pos	-	-	-	-	-	0.0188642
metab_731	-	-	-	5.386	5.3096	5.3007	5.401	5.4667	5.448	5.5398	5.4395	5.4502	5.5546	5.4386	5.3592	5.3213	5.3338	5.3404	5.2209	5.404	5.2471	5.1955	5.2121	5.2418	5.2277	5.2787	5.2911	5.3365	5.3435	5.3522	5.348	pos_733	metab_731	114.055	0.6269	pos	-	-	-	-	-	0.0154514
metab_732	-	-	-	5.1782	5.2119	5.1232	4.705	5.0847	5.0069	4.9782	5.0271	5.119	5.1778	5.0458	5.3161	5.3218	5.2906	5.328	5.2418	5.3363	5.2628	5.1877	5.2128	5.2769	5.2266	5.2626	5.2351	5.1647	5.165	5.1656	5.1797	pos_734	metab_732	253.118	0.6269	pos	-	-	-	-	-	0.0170188
metab_733	-	-	-	3.4716	3.6584	3.6494	3.1226	4.3608	4.2885	4.0042	3.6596	3.9322	3.7115	4.5232	4.6514	4.6768	4.4905	4.6568	4.395	4.42	4.409	4.4881	4.2762	4.6684	4.387	4.3412	4.3882	4.2104	4.1594	4.1462	4.1815	pos_735	metab_733	175.123	0.6464	pos	-	-	-	-	-	0.0653382
metab_734	-	-	-	3.7038	3.164	3.1834	3.1123	3.578	3.3149	3.6183	3.3165	3.7292	3.7186	3.5849	4.0254	3.9848	3.7198	3.7922	3.9708	4.0743	3.9822	4.0668	3.9248	3.907	3.905	4.0577	3.8548	3.554	3.7246	3.708	3.7256	pos_736	metab_734	200.074	0.6464	pos	-	-	-	-	-	0.173222
metab_735	-	-	-	4.5654	4.4852	4.4818	4.0795	4.5578	4.4496	4.6595	4.3929	4.5905	4.5405	4.527	5.1419	5.1245	5.0573	5.0831	5.0127	5.1032	5.0327	5.007	5.0686	5.0879	4.9871	5.0783	5.0124	4.7776	4.7834	4.7777	4.7978	pos_737	metab_735	216.098	0.6464	pos	-	-	-	-	-	0.0221145
Uridine	C00299	HMDB0000296	C9H12N2O6	4.2923	4.2468	4.0026	4.3206	4.3237	4.3159	4.4301	4.0825	4.491	4.347	4.4519	5.3962	4.5607	4.4178	4.5407	4.6688	4.9408	4.9546	5.051	5.1703	5.031	4.9527	5.0762	4.8505	4.6902	4.7151	4.7351	4.7088	pos_738	metab_736	245.077	0.6464	pos	M+H, M+NH4	53.1	-	0.0536551	58-96-8	0.0427407
metab_737	-	-	-	4.2377	3.9091	4.1762	4.0128	4.716	4.5427	4.3987	4.1348	4.5524	4.3892	4.298	4.6836	4.7984	4.8929	5.0772	5.2231	4.8978	5.3459	4.3776	5.1115	5.3052	4.0587	4.6534	5.087	4.7255	4.7499	4.6768	4.716	pos_739	metab_737	280.175	0.6464	pos	-	-	-	-	-	0.0691692
metab_738	-	-	-	3.2473	0.012	0.0119	3.1926	0.0133	2.8146	0.0111	2.5765	0.0142	0.0142	3.2714	4.7391	3.475	3.834	3.9837	3.7272	3.9291	4.2637	4.2861	4.3461	4.5117	3.7409	4.3805	3.8151	3.8345	3.7823	3.8429	3.6592	pos_740	metab_738	320.109	0.6653	pos	-	-	-	-	-	0.180693
metab_739	-	-	-	3.7388	4.0759	3.2194	2.9905	3.9533	3.0972	3.4074	3.5575	3.6549	4.0131	3.8951	3.8841	4.3782	4.2713	4.3137	4.1853	4.1265	4.4205	4.2208	4.4608	4.3022	4.0988	4.0227	4.2381	3.8319	3.9491	3.833	3.8789	pos_741	metab_739	397.208	0.6653	pos	-	-	-	-	-	0.131492
metab_740	-	-	-	5.4021	5.1475	5.3442	5.1072	5.6017	5.3824	5.5597	5.8529	5.7896	5.0975	5.7053	4.5383	5.2359	5.4462	5.449	5.4677	5.6934	5.3365	5.5411	5.4538	5.1294	5.1369	5.3178	5.3013	5.4389	5.4448	5.4429	5.4497	pos_742	metab_740	137.046	0.6843	pos	-	-	-	-	-	0.0103379
metab_741	-	-	-	4.3775	4.254	3.98	3.4361	4.66	3.5809	3.5424	4.6477	4.2796	4.5853	4.5187	4.7521	4.5559	4.6324	4.5215	4.4749	4.7524	4.4543	4.8001	4.5418	4.5241	4.4761	4.7644	4.4517	4.4363	4.4362	4.4367	4.4008	pos_743	metab_741	465.21	0.6653	pos	-	-	-	-	-	0.0401062
metab_742	-	-	-	3.0383	2.635	2.0304	4.3727	3.4189	3.4984	3.7818	2.3986	2.8633	4.0473	2.8561	3.6353	4.0686	1.21	1.2148	3.8611	3.8276	3.4703	3.6706	3.3038	3.6016	3.4711	3.5469	3.653	2.8828	3.064	2.8986	2.8962	pos_744	metab_742	186.04	0.6843	pos	-	-	-	-	-	0.216551
metab_743	-	-	-	4.966	5.0264	5.0413	4.0952	4.9944	4.5812	4.7539	4.9991	5.0346	4.6363	4.8075	4.3524	4.8557	4.8496	4.8446	4.9348	4.7767	5.0002	4.8403	5.0253	5.0985	4.809	4.8159	4.9268	4.8372	4.8374	4.7996	4.8341	pos_745	metab_743	280.202	0.6843	pos	-	-	-	-	-	0.0414789
N-(1-Deoxy-1-fructosyl)histidine	-	HMDB0037839	C12H19N3O7	5.0508	4.977	5.0464	4.8062	4.9374	4.9015	4.8825	4.866	5.0765	5.095	4.8992	5.6252	5.4347	5.4967	5.4196	5.5005	5.4083	5.5486	5.5261	5.5036	5.5771	5.5731	5.3476	5.5786	5.3235	5.3085	5.3082	5.3121	pos_746	metab_744	318.13	0.6843	pos	M+H-H2O, M+H	-	62	0.175269	25020-13-7	0.0166584
metab_745	-	-	-	5.1564	5.1353	5.0933	4.9628	5.1697	5.1078	5.1521	5.1905	5.2368	5.1208	5.3735	5.0992	5.049	5.0536	5.1009	5.1502	5.2958	5.2191	5.1358	5.2473	5.148	5.082	5.1793	5.1911	5.1727	5.1706	5.1726	5.1664	pos_747	metab_745	133.032	0.7022	pos	-	-	-	-	-	0.00682215
metab_746	-	-	-	3.9855	3.7659	3.8566	3.8617	4.1121	3.8281	3.7624	3.7953	4.0949	3.959	3.9455	4.1684	4.0942	4.0761	4.1491	3.8406	4.2345	3.7387	3.7172	3.7798	3.6711	3.7823	3.9593	3.8944	3.9234	3.8964	3.917	3.9402	pos_748	metab_746	135.028	0.7022	pos	-	-	-	-	-	0.0415398
metab_747	-	-	-	4.7433	4.9066	4.869	4.35	4.6849	4.5708	4.7685	4.7289	4.8046	4.7916	4.8007	4.088	4.3843	4.2871	4.1687	4.2568	4.3335	4.3402	4.1256	4.3037	4.4699	4.132	4.1935	4.2796	4.5323	4.5263	4.5223	4.5211	pos_749	metab_747	236.186	0.6843	pos	-	-	-	-	-	0.0116284
metab_748	-	-	-	3.9474	3.5618	3.9348	5.1659	4.4024	4.4563	5.1129	3.5386	4.2622	5.1303	4.1386	4.8371	4.7169	4.6016	4.6875	4.6843	4.7186	4.4717	4.2921	4.3508	4.7344	4.5377	4.6389	4.5657	4.4984	4.4986	4.4694	4.5002	pos_750	metab_748	298.108	0.7022	pos	-	-	-	-	-	0.0336221
metab_749	-	-	-	5.0711	4.7985	4.8688	4.8126	5.0319	5.1065	4.9416	5.0404	5.0849	5.0174	5.132	5.0787	5.0076	4.9779	5.0601	4.9894	5.0873	5.0113	4.9588	4.9773	5.0658	4.9701	5.0224	4.9967	5.0251	5.0216	5.0212	5.0314	pos_751	metab_749	226.071	0.6843	pos	-	-	-	-	-	0.0109457
metab_750	-	-	-	4.5258	4.5199	4.4063	3.8263	4.5384	4.325	4.3473	4.5233	4.4304	4.5898	4.4607	4.9699	5.1088	5.02	5.0202	5.0182	4.9697	4.9517	4.8843	4.9998	5.0177	4.9166	4.9441	4.9758	4.751	4.7511	4.7067	4.7398	pos_752	metab_750	375.191	0.6653	pos	-	-	-	-	-	0.0472881
metab_751	-	-	-	4.9129	5.0868	5.1212	5.6311	5.538	5.8159	5.9693	5.6863	5.2391	5.7645	5.5802	5.0325	4.858	4.8387	4.8921	4.8915	4.9354	4.9012	4.8747	4.9405	4.921	5.1127	4.8934	4.8713	5.3974	5.4092	5.4137	5.4156	pos_753	metab_751	136.076	0.7233	pos	-	-	-	-	-	0.0187038
metab_752	-	-	-	4.79	4.5918	4.666	4.2403	4.679	4.4563	4.5642	4.6553	4.6244	4.6428	4.7377	4.3407	4.3769	4.4828	4.2917	4.2689	4.518	4.5833	4.5151	4.514	4.5191	4.5587	4.5363	4.459	4.5545	4.5566	4.5535	4.5574	pos_754	metab_752	154.025	0.7233	pos	-	-	-	-	-	0.00414394
metab_753	-	-	-	4.4976	4.5467	4.6399	5.0705	4.9667	5.2437	5.3901	5.1193	4.7796	5.1869	5.036	4.6337	4.442	4.458	4.5197	4.3772	4.488	4.2988	4.4376	4.5051	4.4965	4.5321	4.3586	4.4179	4.8402	4.8429	4.84	4.8531	pos_755	metab_753	165.054	0.7233	pos	-	-	-	-	-	0.0143375
metab_754	-	-	-	4.6826	4.4967	4.5468	4.0797	4.6195	4.5015	4.5387	4.5507	4.6722	4.5124	4.6861	4.8038	4.7202	4.766	4.7679	4.6087	4.8774	4.7045	4.5883	4.6614	4.7245	4.5444	4.7136	4.6861	4.6637	4.6619	4.6636	4.6633	pos_756	metab_754	162.058	0.7233	pos	-	-	-	-	-	0.00196711
metab_755	-	-	-	4.6397	4.2446	4.3368	3.913	4.2675	4.0098	4.0469	4.288	4.2743	4.2439	4.2501	4.4782	4.5866	4.6011	4.6961	4.6832	4.6845	4.6454	4.6002	4.5979	4.7423	4.4733	4.3988	4.5095	4.4346	4.3936	4.3673	4.3684	pos_757	metab_755	369.166	0.6653	pos	-	-	-	-	-	0.0741991
metab_756	-	-	-	4.4463	4.3825	4.1667	3.8105	4.2261	4.2376	4.2148	4.2403	4.3503	4.431	4.4581	4.7309	4.6798	4.5275	4.7365	4.7344	4.7347	4.6293	4.5297	4.5888	4.7766	4.4009	4.5803	4.5597	4.4463	4.4314	4.4068	4.4332	pos_758	metab_756	355.151	0.6653	pos	-	-	-	-	-	0.0376476
metab_757	-	-	-	4.6534	4.629	4.5286	3.6828	4.614	4.4245	4.4608	4.6025	4.5663	4.5988	4.5041	4.8652	5.0746	4.9537	5.0244	4.9949	4.9909	4.9563	4.9033	4.8572	5.011	4.7963	4.8901	4.9027	4.6699	4.7031	4.6808	4.672	pos_759	metab_757	354.202	0.6653	pos	-	-	-	-	-	0.0354789
metab_758	-	-	-	4.4982	4.5946	4.2017	3.7743	4.493	4.2668	4.2475	4.4606	4.4845	4.4453	4.3993	4.8699	5.0098	4.9319	4.9919	4.9923	4.8846	4.9581	4.9271	4.8835	5.026	4.8705	4.9379	4.973	4.6592	4.6592	4.6862	4.6659	pos_760	metab_758	322.176	0.6653	pos	-	-	-	-	-	0.0298149
metab_759	-	-	-	4.6534	4.664	4.4827	4.0822	4.6621	4.4779	4.4839	4.5435	4.5113	4.648	4.6111	4.9899	5.0891	5.0014	5.055	5.1073	5.0983	5.0223	4.9893	4.9901	5.078	5.0012	5.0685	5.0131	4.7295	4.7301	4.771	4.7315	pos_761	metab_759	329.153	0.6464	pos	-	-	-	-	-	0.0479685
metab_760	-	-	-	4.0961	3.2597	3.819	4.2977	4.2094	4.0358	3.7343	3.7643	4.1225	4.3709	3.9595	4.5032	4.434	4.4147	4.4123	4.0362	4.4061	3.8531	3.5418	3.7689	3.9791	4.1443	4.1931	4.0439	4.0624	4.0627	4.0483	4.0524	pos_762	metab_760	128.019	0.785	pos	-	-	-	-	-	0.0166694
metab_761	-	-	-	3.6975	2.7182	3.5707	3.5788	4.0637	3.569	3.129	3.6941	3.7857	3.6074	3.3427	3.6717	3.8826	3.7634	3.9761	3.4682	3.985	3.9262	3.0885	3.2206	3.3368	2.8264	3.2984	3.4715	3.5905	3.587	3.5971	3.5885	pos_763	metab_761	196.046	0.785	pos	-	-	-	-	-	0.0103212
metab_762	-	-	-	3.9353	3.2208	3.8433	4.1684	4.1713	3.8413	3.7169	3.5299	4.1916	4.1461	3.7602	4.4541	4.4383	4.3336	4.4373	3.8584	4.503	3.7577	3.3503	3.7096	3.4571	3.774	4.1185	3.8766	3.9372	4.0146	4.0338	4.035	pos_764	metab_762	177.051	0.785	pos	-	-	-	-	-	0.101425
metab_763	-	-	-	4.7875	4.9017	4.7807	4.5645	4.7321	4.6987	4.7299	4.6619	4.7999	4.9418	4.6442	4.7429	4.7637	4.7323	4.744	4.7608	4.8802	4.8656	4.522	4.7784	4.8409	4.6857	4.745	4.7795	4.7582	4.746	4.7666	4.7654	pos_765	metab_763	314.135	0.6653	pos	-	-	-	-	-	0.0215751
metab_764	-	-	-	4.0581	3.9595	3.9808	4.0243	4.0151	3.9055	3.844	3.9608	4.0537	4.0404	4.0228	4.1641	4.2735	4.3271	4.2329	4.1756	4.1924	4.1483	4.0879	4.0715	4.1546	4.1276	4.1339	4.1176	4.0503	4.0505	4.0324	4.0507	pos_766	metab_764	128.951	0.8272	pos	-	-	-	-	-	0.0206318
metab_765	-	-	-	3.3648	2.8785	3.1512	3.4043	3.3563	3.2366	3.0825	2.9139	3.4897	3.371	3.3386	3.5365	3.5715	3.5303	3.574	3.2595	3.4264	3.2051	2.9963	2.9657	3.1446	3.2977	3.3195	3.3175	3.2998	3.3094	3.3056	3.2926	pos_767	metab_765	156.991	0.8272	pos	-	-	-	-	-	0.0167916
metab_766	-	-	-	4.3163	4.4002	4.058	3.2876	4.1524	4.0762	3.3938	4.1762	4.0022	4.1395	4.1273	4.7071	4.8802	4.6699	4.7942	4.6899	4.6964	4.6182	4.7251	4.6378	4.7229	4.6271	4.6789	4.6094	4.4276	4.4289	4.4128	4.3624	pos_768	metab_766	312.192	0.6653	pos	-	-	-	-	-	0.0696599
metab_767	-	-	-	4.6028	4.4586	4.4714	4.225	4.5105	4.3118	4.2845	4.4509	4.5491	4.42	4.3627	4.4925	4.6792	4.5135	4.6708	4.4709	4.6481	4.5451	4.458	4.5143	4.6817	4.4365	4.5553	4.5276	4.4662	4.4744	4.4721	4.4602	pos_769	metab_767	306.155	0.6653	pos	-	-	-	-	-	0.0146879
metab_768	-	-	-	4.3586	4.1047	4.04	3.6411	4.2224	4.1008	4.015	4.0953	4.2341	4.3817	4.0089	4.5759	4.6474	4.4826	4.5814	4.5132	4.6176	4.5281	4.3206	4.371	4.5865	4.3513	4.5237	4.3997	4.3022	4.3025	4.2664	4.2953	pos_770	metab_768	301.14	0.6653	pos	-	-	-	-	-	0.038775
metab_769	-	-	-	3.7747	2.9525	3.4324	3.8803	3.7906	3.6563	3.3394	3.5658	3.6975	4.0017	3.8238	4.1411	4.1156	4.0553	4.0986	3.7075	4.0665	3.5528	3.1812	3.4717	3.6104	3.7878	3.7531	3.6663	3.7117	3.6924	3.672	3.6746	pos_771	metab_769	86.9933	0.8708	pos	-	-	-	-	-	0.0427558
metab_770	-	-	-	4.5253	4.502	4.1713	3.5506	4.4147	4.3112	4.0996	4.3518	4.3644	4.437	4.2339	4.6032	4.7359	4.6259	4.7634	4.6231	4.6578	4.6077	4.608	4.5791	4.7413	4.6287	4.6067	4.6618	4.4097	4.4568	4.4201	4.4117	pos_772	metab_770	298.176	0.6653	pos	-	-	-	-	-	0.0517168
metab_771	-	-	-	4.8615	4.8165	4.7401	4.4118	4.7823	4.6875	4.7395	4.7599	4.9236	4.7702	4.8055	4.9422	5.0705	4.9871	4.9258	4.9519	4.9839	5.0262	4.9936	4.9997	5.0088	5.0215	5.0517	4.9013	4.8524	4.8814	4.8795	4.8815	pos_773	metab_771	149.107	0.8929	pos	-	-	-	-	-	0.0322739
metab_772	-	-	-	5.0427	4.7516	4.484	4.6401	4.8514	4.8547	4.7968	4.6544	4.9641	4.9672	4.9685	5.4235	5.4351	5.3657	5.3809	5.3732	5.3213	5.3451	5.2484	5.2653	5.3106	5.2631	5.2645	5.2014	5.1041	5.1044	5.1203	5.1122	pos_774	metab_772	331.125	0.9149	pos	-	-	-	-	-	0.0177867
metab_773	-	-	-	4.8377	4.7784	4.6521	4.539	4.76	4.7349	4.6102	4.7027	4.8623	4.9036	4.698	5.0389	5.1249	5.0224	5.0376	5.089	5.0711	5.0892	4.9543	5.0043	5.0269	5.0118	5.0369	4.9765	4.8879	4.8884	4.9187	4.9029	pos_775	metab_773	342.166	0.9149	pos	-	-	-	-	-	0.0338372
metab_774	-	-	-	3.8926	3.7192	3.5729	3.0925	3.9146	3.4255	3.1988	3.7807	3.8693	4.0065	3.5167	4.1226	4.2617	4.1161	4.0943	3.8507	4.011	3.8603	3.9623	4.0259	4.0015	3.8733	3.8058	3.9451	3.5752	3.5387	3.2803	3.6517	pos_776	metab_774	340.223	0.9149	pos	-	-	-	-	-	0.319347
metab_775	-	-	-	1.9741	1.8818	1.8774	1.7456	1.9291	4.2577	1.8503	1.8371	1.956	1.9555	4.2395	4.6165	4.4698	4.3657	4.3565	4.466	4.6767	4.2331	4.3439	4.1068	3.8859	3.9029	4.1707	4.3157	3.9414	3.8863	3.8081	3.6602	pos_777	metab_775	447.161	0.9149	pos	-	-	-	-	-	0.261399
metab_776	-	-	-	3.9963	3.9332	3.8959	3.6772	3.9941	4.1523	4.1905	4.0243	4.2842	4.1225	3.8468	4.2656	4.2098	4.2426	4.1416	4.1268	4.1427	4.1238	4.345	4.1881	4.2258	4.1693	4.1507	4.2178	4.1139	4.0922	4.0742	4.1189	pos_778	metab_776	114.067	0.9327	pos	-	-	-	-	-	0.0471942
metab_777	-	-	-	4.5682	4.6342	4.635	4.3433	4.7367	4.6095	4.9106	4.6282	4.9798	4.7346	4.7982	4.9777	4.8964	4.8145	4.8318	4.8741	4.9453	4.8159	4.8484	4.8321	4.8845	4.8116	4.8616	4.8304	4.7627	4.7699	4.7628	4.7942	pos_779	metab_777	147.077	0.9327	pos	-	-	-	-	-	0.034907
metab_778	-	-	-	4.7246	4.7136	4.6793	4.3194	4.722	4.6444	4.6311	4.7126	4.7824	4.6858	4.738	4.8089	4.8834	4.8822	4.8792	4.7727	4.8745	4.8593	4.811	4.8045	4.8663	4.6937	4.7928	4.7519	4.7514	4.7305	4.746	4.7532	pos_780	metab_778	162.058	0.9327	pos	-	-	-	-	-	0.0235172
metab_779	-	-	-	5.4084	5.2947	5.3025	5.0364	5.3484	5.1096	5.2465	5.2764	5.258	5.2822	5.3875	4.8274	4.9761	5.0209	4.8433	4.7697	5.0814	5.1054	5.0788	5.089	5.0512	5.1392	5.0682	5.0146	5.1696	5.149	5.1485	5.1552	pos_781	metab_779	154.025	0.9327	pos	-	-	-	-	-	0.0227699
metab_780	-	-	-	4.8436	4.6352	4.7936	4.7658	4.4506	4.3975	4.5408	4.4334	4.5955	4.6239	4.2524	4.7339	4.7406	4.743	4.6865	4.6822	4.781	4.7552	4.7884	4.7648	4.6985	4.6734	4.6543	4.7287	4.627	4.6224	4.6371	4.6238	pos_782	metab_780	204.134	0.9327	pos	-	-	-	-	-	0.0154144
metab_781	-	-	-	4.3192	4.3626	4.0686	3.7265	4.2844	4.0191	4.0326	4.2848	4.438	4.3812	4.3238	4.7314	4.8514	4.6571	4.7898	4.6879	4.7748	4.7997	4.7254	4.6406	4.81	4.689	4.7715	4.7041	4.5351	4.499	4.5236	4.5202	pos_783	metab_781	310.212	0.9327	pos	-	-	-	-	-	0.0343928
metab_782	-	-	-	4.6922	4.578	4.6329	4.0232	4.6338	4.5071	4.4689	4.71	4.7288	4.7341	4.6277	4.6743	4.747	4.6682	4.6918	4.6489	4.6917	4.7694	4.6698	4.6845	4.718	4.7458	4.6847	4.6385	4.6116	4.6551	4.6533	4.649	pos_784	metab_782	354.202	0.9327	pos	-	-	-	-	-	0.0463372
metab_783	-	-	-	3.9839	4.3442	4.3159	3.7531	4.4874	4.3405	4.7747	4.622	4.8725	4.0702	4.7169	3.9213	4.2805	4.0329	4.2697	4.2027	4.6105	3.9742	4.5234	4.4281	3.9347	3.863	4.27	3.9173	4.3406	4.3922	4.3525	4.3414	pos_785	metab_783	269.161	0.9327	pos	-	-	-	-	-	0.0572359
metab_784	-	-	-	4.3367	4.1823	4.2698	3.9497	4.3812	3.9846	3.3497	3.5017	4.1772	4.1251	3.974	3.3376	2.8537	2.4304	2.5235	2.297	4.0053	3.021	3.2078	2.2952	2.4957	3.1251	2.6214	3.052	3.7889	3.7615	3.7657	3.7625	pos_787	metab_784	176.057	0.9514	pos	-	-	-	-	-	0.0302411
metab_785	-	-	-	5.0255	4.8584	4.9184	4.7208	4.9739	4.8543	4.963	4.933	5.1048	5.0585	4.9789	5.2507	5.2372	5.1828	5.1851	5.1764	5.2287	5.2098	5.2004	5.1619	5.2356	5.1704	5.2325	5.1868	5.0779	5.0782	5.0796	5.0865	pos_788	metab_785	212.092	0.9514	pos	-	-	-	-	-	0.00936078
metab_786	-	-	-	3.9755	3.7607	3.72	2.7754	3.6958	3.4578	3.4944	3.6013	3.9913	3.797	3.7978	4.6929	4.7132	4.5502	4.633	4.5302	4.603	4.3528	4.6762	4.3342	4.4592	4.5558	4.513	4.4914	4.2051	4.2029	4.2054	4.2044	pos_789	metab_786	263.124	0.9514	pos	-	-	-	-	-	0.00256253
metab_787	-	-	-	4.4069	4.2467	4.0141	4.1513	4.1835	4.1122	4.1731	4.26	4.3819	4.211	4.005	4.7767	4.778	4.7035	4.6629	4.7033	4.6679	4.7924	4.5797	4.642	4.8322	4.6565	4.719	4.731	4.5051	4.5122	4.4885	4.516	pos_790	metab_787	295.129	0.9514	pos	-	-	-	-	-	0.0277478
metab_788	-	-	-	4.7829	4.697	4.6345	4.2708	4.6906	4.553	4.5066	4.565	4.6572	4.7507	4.5426	4.8068	4.8938	4.8256	4.8414	4.8617	4.9316	4.906	4.7148	4.7645	4.9803	4.7916	4.8266	4.821	4.7587	4.7451	4.7534	4.779	pos_791	metab_788	329.171	0.9514	pos	-	-	-	-	-	0.0335379
metab_789	-	-	-	4.5371	4.1533	4.0369	4.0364	4.0962	4.1643	4.1318	3.884	4.0917	4.2586	3.9545	4.6026	4.6079	4.6789	4.7844	4.9264	4.6989	4.9728	4.2674	4.739	4.8424	4.3509	4.5506	4.6009	4.4998	4.5195	4.4681	4.4913	pos_792	metab_789	359.181	0.9514	pos	-	-	-	-	-	0.0488905
metab_790	-	-	-	3.9366	3.9412	3.1389	3.0969	3.7765	3.543	3.5452	3.6272	3.9863	3.8888	3.732	4.4079	4.4459	4.2925	4.1823	4.2451	4.241	4.2263	4.1624	4.1678	4.4702	4.1677	4.2138	4.2273	3.9108	3.5996	3.8078	3.7723	pos_793	metab_790	359.145	0.9514	pos	-	-	-	-	-	0.280368
metab_791	-	-	-	4.8962	5.0005	4.9614	4.3391	4.634	4.4595	4.1164	4.7777	4.3785	4.9664	5.1114	3.7182	3.7771	3.5505	3.707	3.7465	4.4951	4.0133	4.5967	4.0579	3.7994	4.3049	3.7631	3.836	4.5788	4.5814	4.581	4.5759	pos_794	metab_791	142.123	0.9727	pos	-	-	-	-	-	0.00571945
metab_792	-	-	-	3.9586	3.7861	3.5807	3.3344	3.8198	3.6379	3.8302	3.6782	3.9018	3.8106	3.6037	3.8613	3.8889	3.8622	3.9361	3.7225	3.8766	3.8466	3.8498	3.4005	4.1312	3.9497	3.7776	3.7139	3.7365	3.6843	3.7363	3.7303	pos_795	metab_792	212.128	0.9727	pos	-	-	-	-	-	0.0563906
metab_793	-	-	-	4.86	4.8069	4.7335	4.5373	4.7845	4.5864	4.6345	4.5888	4.7719	4.7636	4.8201	4.9937	5.0759	5.0016	4.9769	5.0012	5.1001	5.0295	4.9629	4.9332	5.0426	4.9896	4.9607	4.9668	4.8652	4.882	4.8888	4.8905	pos_796	metab_793	299.16	0.9727	pos	-	-	-	-	-	0.0263429
metab_794	-	-	-	3.1691	3.8298	3.2991	3.2618	3.5192	2.6749	2.6676	3.3189	3.7465	3.322	2.7821	4.1727	4.149	4.0902	4.1303	4.071	4.1326	3.7149	3.9937	3.7979	4.2204	3.7287	4.1729	3.7925	3.9252	3.8685	3.9063	3.8522	pos_797	metab_794	336.156	0.9727	pos	-	-	-	-	-	0.0773897
metab_795	-	-	-	4.8152	4.7769	4.6679	4.6192	4.7762	4.7229	4.6215	4.6328	4.7853	4.9417	4.7945	4.8623	4.7959	4.8036	4.8047	4.6031	4.6752	4.589	4.6573	4.5827	4.6923	4.6084	4.6769	4.7273	4.7068	4.7126	4.689	4.7141	pos_798	metab_795	268.093	0.9727	pos	-	-	-	-	-	0.0262502
metab_796	-	-	-	4.4574	4.4179	4.4567	4.7653	4.6143	4.8211	4.9813	4.6428	4.474	4.8135	4.6773	4.0417	3.9966	3.9754	3.966	3.9336	3.9589	3.9722	4.08	4.0282	4.1667	4.1738	3.9728	4.0032	4.4866	4.4871	4.4867	4.5107	pos_799	metab_796	109.065	0.9915	pos	-	-	-	-	-	0.0279666
Benzofuran	C14512	HMDB0032929	C8H6O	5.8373	5.9732	5.9417	6.4678	6.2926	6.5293	6.6607	6.3894	6.1509	6.4886	6.3334	5.8995	5.7735	5.7127	5.7733	5.7573	5.8879	5.7372	5.832	5.8096	5.8099	5.9229	5.7909	5.7701	6.1736	6.1781	6.1777	6.1796	pos_800	metab_797	136.076	0.9915	pos	M+H, M+NH4	68.2	-	2.22167	271-89-6	0.00586322
metab_798	-	-	-	4.2057	4.1953	3.9946	3.9183	4.201	4.1584	3.9895	4.1392	4.2537	4.258	4.0616	4.2943	4.2406	4.3297	4.1953	4.1608	4.2715	4.1667	4.1816	4.075	4.2842	4.1955	4.1209	4.2185	4.1444	4.1324	4.1169	4.1616	pos_801	metab_798	208.072	0.9727	pos	-	-	-	-	-	0.0435576
metab_799	-	-	-	4.6442	4.8043	4.7662	4.869	4.5183	4.2948	4.1064	4.3457	4.1253	4.753	4.3626	4.6402	4.4143	4.3609	4.2984	4.3347	4.549	4.3212	4.5351	4.3763	4.3535	4.529	4.5513	4.4101	4.4281	4.4283	4.4383	4.4589	pos_802	metab_799	198.16	0.9915	pos	-	-	-	-	-	0.0336882
metab_800	-	-	-	4.6608	4.4155	4.467	4.0218	4.4589	4.3234	4.2169	4.4345	4.544	4.5182	4.4274	4.499	4.5451	4.5243	4.5334	4.441	4.3747	4.1626	4.1179	4.0846	4.2407	4.1376	4.2424	3.9747	4.3342	4.346	4.3154	4.3328	pos_803	metab_800	282.134	0.9915	pos	-	-	-	-	-	0.0289178
metab_801	-	-	-	2.0938	2.8018	1.5992	1.4693	2.3067	1.5796	1.5724	2.7419	1.6769	4.614	2.4173	3.0387	3.3441	3.2404	3.1721	3.0734	3.2682	3.035	2.9648	2.6922	3.171	3.0663	2.811	2.7336	1.6521	1.6523	2.2164	1.6538	pos_804	metab_801	417.223	0.9915	pos	-	-	-	-	-	0.809861
metab_802	-	-	-	4.0196	3.677	3.8704	4.1468	3.5902	3.5328	3.1474	3.6768	3.6955	3.7737	3.5368	2.2973	2.296	2.3019	2.5304	2.797	3.4124	2.2901	2.6501	2.2903	2.8566	2.2865	2.3134	2.3066	3.3057	2.435	3.2575	3.3153	pos_805	metab_802	288.192	0.9514	pos	-	-	-	-	-	0.554163
metab_803	-	-	-	5.1283	4.7613	5.1344	4.7275	5.1954	4.7294	5.1081	5.1088	5.1876	5.2101	5.2243	5.3791	5.3869	5.3654	5.3725	5.3619	5.4018	5.3656	5.3174	5.3095	5.4031	5.3238	5.3865	5.3851	5.2461	5.2534	5.2499	5.2575	pos_806	metab_803	194.081	1.0107	pos	-	-	-	-	-	0.0112656
metab_804	-	-	-	5.4896	5.1813	5.0544	5.2648	5.3925	5.486	5.9808	5.4334	5.596	5.3803	5.4876	6.3358	6.0199	6.4542	6.2716	6.3936	6.514	6.1476	6.1889	6.2019	6.3143	6.2725	6.4335	6.2642	6.0847	6.0877	6.0911	6.0929	pos_807	metab_804	241.155	1.0107	pos	-	-	-	-	-	0.0083413
metab_805	-	-	-	3.5936	3.5487	3.3477	3.3175	3.7247	2.8853	3.2906	3.4887	3.6065	3.3588	2.708	4.3757	4.4666	4.4489	4.4511	4.4547	4.2082	4.3646	4.3735	4.2725	4.3255	4.3878	4.4499	4.3356	4.1117	4.112	4.1115	4.1381	pos_808	metab_805	199.087	1.0107	pos	-	-	-	-	-	0.0308123
metab_806	-	-	-	4.3996	4.5516	4.4253	4.372	4.3027	4.275	4.3142	4.3978	4.4351	4.5302	4.3984	4.8219	4.8077	4.7704	4.7121	4.7662	4.8595	4.8501	4.7069	4.7191	4.877	4.773	4.7615	4.73	4.5762	4.5832	4.5856	4.5796	pos_809	metab_806	279.134	0.9514	pos	-	-	-	-	-	0.00941063
metab_807	-	-	-	4.4804	4.2571	4.3673	3.5351	4.4118	4.4494	4.1971	4.3107	4.3424	4.668	4.4529	4.4935	4.0762	3.8915	3.8106	4.3257	4.5012	4.1257	3.9951	3.9341	4.1138	3.8322	4.0117	3.8351	4.2505	4.2258	4.2288	4.2888	pos_810	metab_807	352.139	1.0107	pos	-	-	-	-	-	0.0682452
metab_808	-	-	-	5.3916	5.3258	5.246	5.1493	5.3035	5.2136	5.264	5.2155	5.3478	5.4078	5.3176	5.9961	6.0446	5.9812	5.9986	5.9987	6.0379	6.0013	5.9117	5.8825	6.0192	5.9225	5.9895	5.9178	5.7621	5.7511	5.754	5.7525	pos_811	metab_808	289.139	0.9327	pos	-	-	-	-	-	0.0114045
Phenol	C15584;C00146;C01108	HMDB0000228	C6H6O	5.4059	5.3997	5.3051	4.9674	5.1776	4.9346	5.0304	5.3127	5.3265	5.2128	5.4611	4.9064	4.9432	4.9842	5.0371	5.173	5.1235	5.1912	5.222	5.2263	5.1901	5.1324	5.2414	5.1894	5.1778	5.178	5.1747	5.1672	pos_812	metab_809	95.0496	1.0316	pos	M+H-H2O, M+H	53.5	-	7.21248	108-95-2	0.0116346
metab_810	-	-	-	4.5914	4.5	4.3973	4.2094	5.2617	5.0284	4.981	5.0729	5.354	5.0521	5.1511	5.0952	5.1295	5.1203	5.1384	5.0134	5.0509	4.9847	4.9748	4.9801	5.0899	4.9277	5.0409	5.0432	4.9604	4.9607	4.9646	4.9743	pos_813	metab_810	243.134	1.0316	pos	-	-	-	-	-	0.015069
metab_811	-	-	-	4.7215	4.6744	4.615	4.3492	4.755	4.5676	4.5853	4.632	4.7048	4.7529	4.7397	4.9869	5.0127	4.9154	4.9429	4.9636	4.9918	4.9997	5.0063	4.9392	5.0087	4.9562	4.9954	4.9174	4.8021	4.8022	4.8091	4.811	pos_814	metab_811	253.155	0.9327	pos	-	-	-	-	-	0.010658
metab_812	-	-	-	3.7042	3.6357	3.5521	2.9697	3.3796	3.0833	3.0759	3.5451	3.5611	3.2032	3.5663	3.493	3.1897	3.418	3.4966	3.6867	3.3976	3.5652	3.5765	3.5406	3.7352	3.306	3.7422	3.4867	3.4078	3.4083	3.3211	3.41	pos_815	metab_812	102.047	1.0528	pos	-	-	-	-	-	0.0958113
metab_813	-	-	-	4.4569	4.3259	4.496	4.2151	4.4854	4.4246	4.4267	4.4985	4.5217	4.5774	4.4014	4.9954	4.9956	4.9683	4.9494	4.8639	4.9606	4.9205	4.8342	4.8367	5.0029	4.764	4.8912	4.8409	4.7292	4.7336	4.7253	4.7272	pos_816	metab_813	176.074	1.0528	pos	-	-	-	-	-	0.00820908
metab_814	-	-	-	5.0074	4.831	5.0056	4.8523	4.801	4.9043	4.898	4.8596	5.0256	5.0371	4.8954	5.6738	5.5355	5.65	5.4353	5.6025	5.3801	5.6536	5.5958	5.5782	5.6847	5.6871	5.3537	5.6638	5.3603	5.357	5.3689	5.3586	pos_817	metab_814	318.13	1.0528	pos	-	-	-	-	-	0.0122531
metab_815	-	-	-	3.5623	2.3129	4.3463	3.7135	3.4934	3.9057	3.0104	3.1458	2.3876	4.0098	3.5425	3.924	3.7099	3.7406	3.9331	3.4723	3.7982	3.0633	3.3926	2.3887	4.0933	2.9924	3.3394	3.6044	3.49	2.3626	3.0736	3.0082	pos_818	metab_815	363.205	1.0528	pos	-	-	-	-	-	0.879003
metab_816	-	-	-	2.4297	3.1951	2.5438	3.3453	3.2901	3.8818	3.8698	3.6441	3.275	2.3561	3.557	2.1353	2.1667	3.0306	2.9562	2.843	2.8113	3.2666	3.2725	3.5371	2.6501	2.1478	2.571	3.1441	3.0433	3.1975	2.9381	2.9505	pos_819	metab_816	145.069	1.0734	pos	-	-	-	-	-	0.296027
metab_817	-	-	-	4.4262	4.2708	4.3377	3.7943	4.1988	4.3553	4.4297	4.3575	4.5569	4.3389	4.2914	4.2684	4.4353	4.2674	4.3524	4.2206	4.3053	4.414	4.3797	4.1522	4.3365	4.3279	4.2534	4.3193	4.2642	4.2641	4.2936	4.2765	pos_820	metab_817	240.123	0.9327	pos	-	-	-	-	-	0.0323754
3-Nitrophenol	C14418	-	C6H5NO3	4.6588	5.5285	4.4734	5.456	4.5396	4.5879	4.4618	4.4453	4.7004	4.6768	5.5713	4.5592	4.5287	4.4826	4.5384	4.3526	4.5442	4.3718	4.5322	4.3844	4.4266	4.4115	4.5123	4.4328	4.7821	4.7823	4.7907	4.7853	pos_821	metab_818	140.034	1.0734	pos	M+H-H2O, M+H	71.8	-	1.29979	-	0.00927815
metab_819	-	-	-	4.5446	4.5108	4.5825	4.3366	4.4162	4.4109	4.4916	4.3086	4.5402	4.5902	4.2105	4.6332	4.6661	4.6869	4.6294	4.6249	4.6588	4.528	4.5777	4.5839	4.6608	4.6326	4.6661	4.6066	4.5448	4.5432	4.5447	4.5021	pos_822	metab_819	239.15	0.9327	pos	-	-	-	-	-	0.0473338
metab_820	-	-	-	5.0088	4.7057	4.934	5.0378	4.9704	4.8975	4.885	5.0877	4.9881	5.0012	5.1717	4.4961	4.6222	4.6974	4.6634	4.5444	4.8425	4.6489	4.7419	4.7416	4.5798	4.6906	4.6533	4.598	4.8232	4.8192	4.8407	4.8193	pos_823	metab_820	113.035	0.9327	pos	-	-	-	-	-	0.0238395
metab_821	-	-	-	3.7551	2.7876	3.0618	4.042	4.1631	3.9935	2.7556	2.8591	3.9382	3.5632	3.722	4.6646	4.2005	4.3357	4.0289	3.4885	4.2302	3.6072	3.2705	3.1432	3.3007	3.8512	4.365	3.6574	3.8218	3.8342	3.84	3.8417	pos_824	metab_821	154.035	1.0943	pos	-	-	-	-	-	0.0205617
metab_822	-	-	-	4.314	4.5448	4.765	4.0125	4.2132	4.3729	4.4919	4.4176	4.2902	4.4853	4.6766	4.0343	4.1618	4.1104	4.0702	3.9934	4.1757	4.1175	4.016	4.0692	4.2943	4.0784	4.1535	4.1123	4.2905	4.2998	4.3061	4.3078	pos_825	metab_822	182.118	1.0943	pos	-	-	-	-	-	0.0180577
metab_823	-	-	-	2.6885	2.5954	2.5909	3.5808	3.5344	3.4236	2.5634	2.5501	2.9742	2.6697	2.6036	4.2805	3.459	3.842	3.2677	2.6733	3.4921	2.6711	2.6411	2.6714	2.6954	3.3351	3.8085	2.6877	2.972	2.9586	2.908	2.9748	pos_826	metab_823	205.046	1.0943	pos	-	-	-	-	-	0.0693499
metab_824	-	-	-	4.8321	4.6148	4.6908	4.9231	4.2543	4.4276	4.308	4.6654	4.6951	4.4495	4.3506	4.3131	4.3322	3.9799	3.8468	4.0393	4.0632	3.659	3.6534	3.4723	3.5221	3.4995	3.9577	3.6142	4.3006	4.2758	4.2936	4.3023	pos_827	metab_824	240.109	1.0943	pos	-	-	-	-	-	0.0276841
metab_825	-	-	-	3.613	3.7448	3.3541	2.9808	3.7545	3.6631	3.5334	3.7213	3.5983	3.7249	3.1989	4.2741	4.3379	4.3616	4.3798	4.3829	4.3634	4.2889	4.0698	4.2015	4.0991	3.913	4.3232	4.2487	3.9974	4.0492	3.9974	4.012	pos_828	metab_825	254.186	1.0943	pos	-	-	-	-	-	0.057517
metab_826	-	-	-	4.5015	4.4849	4.3531	4.2935	4.5869	4.3551	4.464	4.3631	4.3741	4.6212	4.2847	4.7613	4.7125	4.7281	4.6251	4.6427	4.6932	4.6737	4.5187	4.6178	4.7227	4.6095	4.664	4.6196	4.5118	4.4915	4.5173	4.5192	pos_829	metab_826	254.102	1.0943	pos	-	-	-	-	-	0.0288425
metab_827	-	-	-	3.6715	3.8368	3.4054	3.2715	3.8774	3.4675	3.5701	3.7929	3.9696	3.8063	3.6317	4.6425	4.6571	4.408	4.4493	4.5013	4.586	4.3355	4.4041	4.3245	4.4803	4.4255	4.4864	4.4473	4.1143	4.1143	4.1534	4.1148	pos_830	metab_827	316.166	1.0943	pos	-	-	-	-	-	0.0458332
metab_828	-	-	-	3.7105	2.4373	2.4329	3.9984	4.1817	3.9633	2.4054	2.7479	3.8583	3.2971	3.5102	4.6871	4.0435	4.3221	3.8809	3.6261	4.0964	3.3951	2.483	3.1649	3.1672	3.7829	4.3543	3.4611	3.7939	3.8145	3.8088	3.7559	pos_831	metab_828	182.03	1.0943	pos	-	-	-	-	-	0.0594683
metab_829	-	-	-	4.8632	4.9063	4.9286	4.2975	5.1074	5.1347	4.645	4.8694	4.8329	5.2155	5.3298	4.0218	4.079	2.3886	2.8526	2.9143	4.3772	3.816	4.2021	3.2837	3.8281	3.7898	3.2186	3.5984	4.5578	4.5655	4.5578	4.5903	pos_832	metab_829	187.155	1.1151	pos	-	-	-	-	-	0.0360323
metab_830	-	-	-	3.8409	2.95	3.5866	3.7484	4.2449	4.033	2.8179	3.7599	4.0175	3.261	4.0043	4.5536	4.2064	4.4645	4.1391	4.0232	4.1548	4.0934	3.8434	3.9407	3.79	4.0446	4.5447	3.8544	4.0139	4.0142	4.0434	4.0231	pos_833	metab_830	156.981	1.0943	pos	-	-	-	-	-	0.0322569
metab_831	-	-	-	4.6452	4.5728	4.708	4.8302	4.7955	4.7106	4.809	4.775	4.9424	4.631	4.597	4.6523	4.6022	4.5692	4.6429	4.5471	4.7002	4.6086	4.4828	4.5168	4.6102	4.4406	4.5645	4.6165	4.5865	4.5868	4.5864	4.6143	pos_834	metab_831	276.144	1.1151	pos	-	-	-	-	-	0.03239
metab_832	-	-	-	5.2501	5.1869	5.1845	5.4584	5.2036	5.2113	5.0666	4.8913	4.9258	5.6059	5.178	5.2597	5.2916	5.1817	5.1095	5.0585	5.2774	5.1715	5.0791	4.9633	5.1519	5.2959	5.1691	5.1614	5.1555	5.1675	5.1672	5.1677	pos_835	metab_832	230.113	1.1151	pos	-	-	-	-	-	0.0136597
metab_833	-	-	-	4.2365	4.3092	4.3404	3.6856	4.4286	4.456	4.016	4.2354	4.222	4.5408	4.628	3.3872	3.422	3.0195	2.7137	2.7047	3.7173	3.0627	3.489	2.8484	3.0685	3.1148	2.8373	3.0858	3.9534	3.9713	3.9482	3.9587	pos_836	metab_833	127.123	1.137	pos	-	-	-	-	-	0.0229463
metab_834	-	-	-	3.9081	3.7322	3.0592	3.5628	3.6375	3.59	3.8751	2.9378	3.9604	3.8498	3.5465	4.5732	4.333	4.4279	4.4073	4.3721	4.3128	4.2939	4.392	4.2966	4.4112	4.3177	4.3472	4.3384	3.9956	4.0488	4.0171	4.0093	pos_837	metab_834	212.055	1.137	pos	-	-	-	-	-	0.0526137
metab_835	-	-	-	3.9206	3.6201	3.3957	3.2508	3.6497	3.6523	3.9287	3.5339	3.9223	3.8153	3.4994	4.6022	4.5086	4.6878	4.6557	4.5323	4.4824	4.4168	4.5845	4.5309	4.6545	4.561	4.5969	4.5768	4.0965	4.1276	4.1388	4.1401	pos_838	metab_835	258.061	1.137	pos	-	-	-	-	-	0.0458894
metab_836	-	-	-	4.5677	4.6012	4.37	4.0082	4.6678	4.3692	4.3086	4.5779	4.6799	4.5564	4.364	4.8994	5.0376	4.906	4.8793	4.9858	4.8894	5.0211	4.9126	4.9183	4.8528	4.9864	4.9426	4.8327	4.6831	4.7349	4.7482	4.7371	pos_839	metab_836	338.207	0.9149	pos	-	-	-	-	-	0.0649347
metab_837	-	-	-	3.2619	1.8311	1.8267	1.6951	1.8783	1.8068	1.7995	1.7864	3.797	1.9046	1.8392	1.9132	1.9118	1.9178	1.9228	1.9081	1.9222	4.8834	5.438	5.4616	2.0576	5.4036	1.9291	5.0556	4.4054	4.3762	4.3631	4.365	pos_840	metab_837	581.267	1.137	pos	-	-	-	-	-	0.0456529
metab_838	-	-	-	5.4382	5.0462	5.2391	5.9675	5.5802	5.5447	5.4771	5.6665	5.4907	5.5112	6.016	5.2119	5.2598	5.239	5.3276	5.2613	5.5097	5.2104	5.3666	5.5114	5.3277	5.1988	5.3156	5.1905	5.4758	5.4721	5.4782	5.4809	pos_841	metab_838	152.057	1.1586	pos	-	-	-	-	-	0.00851956
2,8-Dihydroxyadenine	-	HMDB0000401	C5H5N5O2	3.1804	3.4703	4.2396	3.5141	3.4317	4.018	3.0985	3.2069	3.7753	3.4292	4.1298	4.7358	4.7436	4.6658	4.1084	3.7265	4.6725	4.5294	4.5631	4.4967	4.5467	4.4577	4.4678	4.604	4.2875	4.2825	4.2949	4.3095	pos_842	metab_839	168.052	1.1586	pos	M+H-2H2O, M+H	76.2	-	-6.95446	30377-37-8	0.027212
metab_840	-	-	-	5.2695	4.8226	4.2753	3.7891	4.1179	2.7003	1.9385	3.6231	4.5918	3.8397	4.1325	3.669	3.1924	2.5451	2.6506	2.0475	2.7331	4.1677	4.0993	4.473	4.1019	3.7069	4.2853	4.4735	4.291	4.2848	4.2845	4.3044	pos_843	metab_840	201.022	1.1586	pos	-	-	-	-	-	0.0215855
metab_841	-	-	-	4.6922	4.7703	4.2323	4.0395	4.3106	4.2849	4.4751	4.2432	4.5589	4.679	4.0526	4.5136	4.4065	4.3421	4.4465	4.3421	4.5123	4.393	4.3325	4.2436	4.42	4.3002	4.276	4.2811	4.4065	4.3982	4.4144	4.4164	pos_844	metab_841	242.102	1.1586	pos	-	-	-	-	-	0.0190124
metab_842	-	-	-	4.2215	4.3793	4.1946	3.0279	3.9671	3.7318	3.6178	3.9344	4.2315	4.0848	3.989	3.8498	4.1793	4.1184	4.1416	4.0844	4.2309	4.1203	4.2019	4.0769	4.1848	4.0011	4.1726	4.2159	4.0139	3.9681	4.029	4.0708	pos_845	metab_842	325.212	1.1586	pos	-	-	-	-	-	0.0972535
metab_843	-	-	-	3.9467	3.8478	4.0333	4.2397	4.2152	4.1745	4.1993	4.1999	4.4329	4.2241	4.2851	4.4113	4.3681	4.2891	4.3151	4.3747	4.4962	5.1219	5.5386	5.5092	4.4127	5.4916	4.287	5.2085	4.6677	4.6873	4.6869	4.6868	pos_846	metab_843	435.209	1.1586	pos	-	-	-	-	-	0.0219128
metab_844	-	-	-	5.9216	5.6727	5.8818	5.6548	5.7936	5.594	6.2047	5.6133	5.8917	5.7083	5.7938	6.8216	6.789	6.7702	6.7955	6.817	6.8426	6.8217	6.8063	6.8191	6.8708	6.7992	6.8327	6.8331	6.5791	6.5778	6.5841	6.6085	pos_847	metab_844	229.155	1.1586	pos	-	-	-	-	-	0.0335202
metab_845	-	-	-	4.4206	4.2303	4.3132	4.0819	4.122	4.2457	4.1511	3.8861	4.2066	4.3348	3.8215	4.4099	4.4251	4.3618	4.4292	4.2867	4.4076	4.2967	4.2584	4.217	4.449	4.3174	4.453	4.2927	4.233	4.2865	4.2698	4.3046	pos_848	metab_845	272.113	1.18	pos	-	-	-	-	-	0.0692546
metab_846	-	-	-	5.1221	5.1054	4.9722	4.7493	5.0717	4.9675	4.971	5.0193	5.0374	5.1456	5.0007	5.4796	5.4882	5.4272	5.4697	5.4986	5.5487	5.4663	5.4259	5.3958	5.5019	5.4233	5.4723	5.4617	5.2859	5.2844	5.2934	5.2859	pos_849	metab_846	307.129	1.18	pos	-	-	-	-	-	0.00941327
Thymine	C00178	HMDB0000262	C5H6N2O2	5.5411	5.2832	5.2473	5.1182	5.2585	5.0262	4.9194	5.397	5.316	5.4697	5.2658	5.0092	5.1534	5.1195	5.1175	5.0649	5.385	5.316	5.2694	5.1051	5.0761	5.1833	5.1885	5.2348	5.2113	5.2223	5.2218	5.2237	pos_850	metab_847	127.05	1.2012	pos	M+H-H2O, M+H	89.3	-	2.98869	65-71-4	0.0130669
metab_848	-	-	-	4.174	3.6219	4.1266	4.7935	4.6148	4.5745	4.4779	4.8839	4.6301	4.1233	5.1063	4.5479	4.4688	4.0244	4.1051	4.3634	4.7571	3.4326	4.1249	4.2308	3.6906	2.9464	3.6383	2.9666	4.4246	4.4221	4.4301	4.4236	pos_851	metab_848	138.049	1.2012	pos	-	-	-	-	-	0.00806066
metab_849	-	-	-	4.5647	4.5442	4.3699	4.1667	4.4576	4.3938	4.4249	4.3616	4.5655	4.5449	4.4765	4.9144	4.933	4.8982	4.9162	4.9016	5.002	4.8962	4.8583	4.8273	4.9641	4.8026	4.8812	4.8933	4.6728	4.7047	4.6926	4.7059	pos_852	metab_849	261.123	1.18	pos	-	-	-	-	-	0.0349738
metab_850	-	-	-	5.5567	5.5419	5.4694	5.2282	5.4699	5.4299	5.4664	5.4487	5.5703	5.5376	5.4756	5.5953	5.607	5.5818	5.5507	5.5602	5.644	5.6237	5.5488	5.5312	5.6308	5.5898	5.62	5.5469	5.5248	5.525	5.5288	5.5329	pos_853	metab_850	195.113	1.2231	pos	-	-	-	-	-	0.00880848
metab_851	-	-	-	4.6686	4.7348	4.5565	4.5063	4.7018	4.6355	4.7741	4.6041	4.8334	4.7367	4.7236	4.9133	4.8557	4.8251	4.8468	4.8558	4.9405	4.7793	4.8689	4.8266	4.8522	4.7815	4.8782	4.7877	4.7679	4.7622	4.7703	4.7721	pos_854	metab_851	201.087	1.2231	pos	-	-	-	-	-	0.00993562
metab_852	-	-	-	4.4072	4.3283	5.0009	4.3919	5.0102	4.9418	5.0397	4.8772	4.8402	4.4192	5.1078	3.9426	4.3227	4.1719	4.1716	4.2078	4.327	4.1263	4.3079	4.0119	4.1015	4.0687	4.1732	4.2944	4.6159	4.6161	4.6235	4.6217	pos_855	metab_852	200.128	1.2231	pos	-	-	-	-	-	0.00885997
metab_853	-	-	-	5.7743	5.758	5.6771	5.4222	5.6522	5.6254	5.5944	5.6711	5.7447	5.7318	5.6972	5.6385	5.7349	5.6999	5.6642	5.7114	5.7606	5.7759	5.6649	5.6935	5.785	5.7219	5.7451	5.6581	5.678	5.6876	5.6905	5.6924	pos_856	metab_853	254.161	1.2231	pos	-	-	-	-	-	0.0146868
metab_854	-	-	-	5.7946	6.2206	6.3285	6.6623	6.6932	6.6521	6.5541	6.6325	6.5952	6.6853	6.6971	5.3414	4.4163	3.7378	5.258	5.3284	5.3894	4.7071	5.2311	4.6357	4.4507	4.725	4.0831	4.7831	6.2816	6.2735	6.2709	6.2675	pos_857	metab_854	434.189	1.2231	pos	-	-	-	-	-	0.0139397
metab_855	-	-	-	3.7126	3.5213	2.6787	3.1426	3.0674	3.1849	2.7909	2.2183	2.7886	3.107	2.6352	3.4376	2.8833	3.456	3.5602	3.0951	3.7093	3.0778	2.9319	3.3097	3.2605	3.0042	3.3669	2.9544	3.2936	2.8101	3.2516	3.2973	pos_858	metab_855	248.112	1.2231	pos	-	-	-	-	-	0.400923
metab_856	-	-	-	4.5094	4.3757	4.4404	4.6157	4.5012	4.4619	4.4164	4.373	4.5722	4.498	4.4934	4.6736	4.668	4.7106	4.6792	4.5545	4.5695	4.5679	4.5412	4.5282	4.5288	4.6474	4.5814	4.5191	4.5328	4.5336	4.535	4.5345	pos_859	metab_856	130.967	1.2448	pos	-	-	-	-	-	0.00223909
metab_857	-	-	-	3.809	3.7137	3.4666	3.4465	3.6086	3.4072	3.2364	3.9081	3.5688	3.703	3.8855	4.0344	4.1156	4.0503	3.8202	4.0715	4.2844	4.1146	4.1188	4.0307	3.9875	4.1194	4.0004	4.0328	3.804	3.7766	3.587	3.8035	pos_860	metab_857	252.098	1.18	pos	-	-	-	-	-	0.212695
metab_858	-	-	-	4.7451	4.7174	4.2366	4.1069	4.7363	4.4241	4.6736	4.587	4.8832	4.6124	4.6345	4.7304	4.9077	4.8164	4.8166	4.7982	4.9027	4.7894	4.7517	4.7816	4.9065	4.7853	4.7972	4.7528	4.717	4.7172	4.7227	4.7205	pos_861	metab_858	235.181	1.2448	pos	-	-	-	-	-	0.00638281
metab_859	-	-	-	4.9066	4.6848	4.7483	4.8464	4.7913	4.7451	4.7972	4.6758	4.9946	4.8794	4.8137	4.9746	4.9518	4.9422	4.9598	4.8694	4.8818	4.8954	4.9035	4.8774	4.8627	4.8992	4.9146	4.8767	4.8563	4.8567	4.8614	4.8633	pos_862	metab_859	299.062	1.2448	pos	-	-	-	-	-	0.00800101
metab_860	-	-	-	4.234	4.1997	4.1758	4.0271	4.3976	4.4422	4.4075	4.1923	4.6385	4.3956	4.1378	4.407	4.2372	4.3649	4.3306	4.1682	4.3202	4.2099	4.2164	4.1204	4.239	4.1558	4.3262	4.2962	4.2457	4.2461	4.2526	4.258	pos_863	metab_860	125.024	1.2669	pos	-	-	-	-	-	0.0134766
metab_861	-	-	-	4.4964	4.5625	4.3126	4.0894	4.3949	4.2574	4.2768	4.3022	4.4446	4.488	4.3229	4.9642	5.0138	4.8876	4.9675	4.9856	5.0519	4.9535	4.9731	4.9122	4.9999	5.0294	5.0219	5.0124	4.7208	4.7562	4.754	4.7576	pos_864	metab_861	359.164	1.2448	pos	-	-	-	-	-	0.0397728
metab_862	-	-	-	2.4181	2.7508	2.6144	2.6392	3.3173	3.1986	3.4169	2.6166	2.8605	2.3993	3.3507	3.8072	3.7628	3.463	3.612	3.9005	3.699	3.3707	3.4581	3.5151	3.4586	3.1696	3.9157	3.3926	3.3405	3.3409	3.3614	3.383	pos_865	metab_862	190.072	1.2669	pos	-	-	-	-	-	0.0470767
metab_863	-	-	-	3.834	3.8948	3.778	3.5537	3.6657	3.3453	3.6362	3.5402	3.8205	3.7309	3.5846	5.0717	5.053	4.151	4.1556	5.0409	4.9826	4.6731	4.6883	4.6472	4.5813	4.6298	4.509	4.7381	4.4721	4.4683	4.4775	4.4794	pos_866	metab_863	254.089	1.2669	pos	-	-	-	-	-	0.0115786
metab_864	-	-	-	4.5192	4.0179	4.5033	4.2558	3.521	4.0828	3.3213	3.7995	3.6633	3.3312	4.1761	3.6286	3.2956	3.4442	2.8101	3.6284	3.3916	2.7931	3.9335	4.0048	3.5922	3.3687	3.3843	4.0689	3.9777	3.9298	3.9779	3.9797	pos_867	metab_864	327.141	1.2669	pos	-	-	-	-	-	0.0544255
metab_865	-	-	-	4.7813	4.6599	4.5197	4.818	4.6238	4.6799	5.0094	4.5173	4.6379	4.8782	4.6435	4.5217	4.399	4.3983	4.4911	4.4173	4.5121	4.5093	4.4643	4.2478	4.4324	4.3232	4.4647	4.5113	4.5529	4.5786	4.5783	4.5799	pos_868	metab_865	140.034	1.2882	pos	-	-	-	-	-	0.0296211
metab_866	-	-	-	4.285	4.2553	4.1445	3.7773	4.2193	4.0285	4.3603	4.1626	4.4868	4.2196	4.261	4.0589	4.2004	4.071	4.1187	4.2158	4.2962	4.191	4.2222	4.3924	4.1485	3.9657	4.1205	4.1897	4.1788	4.2327	4.2316	4.2215	pos_869	metab_866	169.134	1.2882	pos	-	-	-	-	-	0.056927
metab_867	-	-	-	4.4282	4.1567	4.2646	4.4835	4.1552	4.5991	4.3623	4.1408	4.6185	4.3922	4.3761	3.7291	3.0343	3.7348	3.9715	3.8939	4.0057	3.907	4.0273	4.1538	4.013	4.1172	4.1808	4.2641	4.1468	4.1582	4.1551	4.1747	pos_870	metab_867	256.075	1.2882	pos	-	-	-	-	-	0.0271626
metab_868	-	-	-	5.3028	5.3071	5.107	5.0208	5.2175	5.1313	5.1715	5.1401	5.2358	5.3468	5.1702	5.3745	5.3417	5.3522	5.3383	5.3409	5.4046	5.3471	5.2682	5.257	5.377	5.3094	5.3489	5.3589	5.245	5.2692	5.2713	5.2666	pos_871	metab_868	293.113	1.2882	pos	-	-	-	-	-	0.0276836
metab_869	-	-	-	4.3612	4.3894	4.1055	4.1515	4.3046	4.2388	4.206	4.1208	4.501	4.4641	4.2398	3.6446	3.8408	3.5873	3.8552	3.7809	3.8968	3.8205	3.7702	3.6201	3.8721	3.8829	3.7638	3.8696	3.9624	4.0607	4.0593	4.0614	pos_872	metab_869	315.119	1.2882	pos	-	-	-	-	-	0.106419
metab_870	-	-	-	3.8748	3.6781	3.3567	3.2337	3.6824	3.2528	3.1816	3.1211	3.8736	3.3188	3.475	3.7298	3.6229	4.0109	3.8284	3.6856	3.8542	3.7848	3.6703	3.4168	3.7799	3.8441	3.8826	3.683	3.5681	3.5365	3.6233	3.551	pos_873	metab_870	247.082	1.2882	pos	-	-	-	-	-	0.089941
metab_871	-	-	-	4.4078	4.2309	3.84	3.728	4.2882	4.0858	4.0667	4.1369	4.2763	4.2292	4.1778	4.6846	4.7098	4.7229	4.8053	4.7527	4.8052	4.7762	4.8248	4.8003	4.7522	4.8223	4.8007	4.7886	4.5441	4.5448	4.5683	4.556	pos_874	metab_871	304.177	1.2669	pos	-	-	-	-	-	0.0263866
metab_872	-	-	-	5.85	5.8599	5.7708	5.5464	5.8073	5.6552	5.7006	5.6724	5.7028	5.8697	5.8251	6.0677	6.1283	6.0396	5.9896	6.0681	6.184	6.0509	5.982	6.0122	6.154	6.102	6.0818	6.0183	5.9339	5.9388	5.9438	5.9503	pos_875	metab_872	193.134	1.1586	pos	-	-	-	-	-	0.0162107
metab_873	-	-	-	4.665	4.1684	4.543	4.4971	4.4422	4.2676	4.327	4.7506	4.407	4.8799	4.7225	3.6945	3.7998	3.9478	3.7753	3.7064	4.4606	3.7564	3.8385	3.9031	3.7174	3.6956	3.9219	3.6882	4.2835	4.3039	4.3035	4.3054	pos_876	metab_873	154.025	1.3101	pos	-	-	-	-	-	0.0236797
metab_874	-	-	-	4.8464	4.9261	4.8373	4.5018	4.9274	4.9287	4.9577	4.8754	5.019	5.0183	4.8692	5.17	5.0146	5.065	5.0321	4.9108	5.0583	4.9233	4.9572	4.8796	4.9646	4.9596	5.0258	4.9496	4.9397	4.9252	4.9489	4.9481	pos_877	metab_874	150.091	1.3101	pos	-	-	-	-	-	0.0250854
metab_875	-	-	-	4.3824	4.3173	4.0945	3.9127	4.325	4.2688	4.2386	4.116	4.3402	4.3069	4.2869	4.6307	4.5826	4.5475	4.4725	4.5264	4.6103	4.6465	4.6437	4.5932	4.6879	4.6722	4.6418	4.6725	4.433	4.4516	4.465	4.4428	pos_878	metab_875	206.067	1.3101	pos	-	-	-	-	-	0.0313405
metab_876	-	-	-	4.0161	4.1009	4.5857	2.9853	3.6333	3.7621	3.8643	3.7647	4.0075	3.8846	3.8516	3.1427	3.4183	3.1868	3.382	3.4215	3.4334	3.0359	3.4501	3.3603	3.416	3.3278	3.3884	3.3285	3.6499	3.824	3.847	3.8498	pos_879	metab_876	245.186	1.3101	pos	-	-	-	-	-	0.196996
metab_877	-	-	-	4.228	4.2836	4.0865	4.0196	4.1388	4.0384	4.0835	4.0332	3.9233	4.251	4.0509	4.6858	4.5822	4.6325	4.5057	4.5815	4.6141	4.5663	4.4918	4.595	4.7251	4.7356	4.5512	4.6178	4.3809	4.3936	4.3932	4.3412	pos_880	metab_877	376.151	1.3101	pos	-	-	-	-	-	0.0555085
metab_878	-	-	-	4.5204	4.3906	4.703	4.354	4.383	4.3064	4.2388	4.3871	4.1843	4.4632	4.4165	4.1708	4.4184	4.3979	4.4303	4.2865	4.4764	4.2764	4.3707	4.3077	4.3307	4.3288	4.0894	4.1308	4.3157	4.3307	4.3862	4.28	pos_881	metab_878	411.224	1.3101	pos	-	-	-	-	-	0.103226
metab_879	-	-	-	4.1922	4.1558	4.4029	3.9844	4.1126	3.9434	4.201	4.1136	4.2164	4.0722	4.0313	4.5758	4.4631	4.379	4.4491	4.3136	4.487	4.3381	4.8185	4.9344	4.4765	4.791	4.6984	4.9932	4.4259	4.4626	4.4623	4.4573	pos_882	metab_879	238.119	1.331	pos	-	-	-	-	-	0.0397222
metab_880	-	-	-	4.0405	4.1841	3.9446	3.9469	3.9199	3.7813	4.0956	3.7043	4.0089	4.03	3.8707	4.4382	4.5797	4.4587	4.4814	4.3758	4.5461	4.5335	4.2221	4.4229	4.5352	4.4335	4.4156	4.4677	4.2535	4.2497	4.2481	4.3044	pos_883	metab_880	323.124	1.331	pos	-	-	-	-	-	0.0642353
metab_881	-	-	-	5.0139	5.028	4.9253	4.7078	4.9133	4.7573	4.8626	4.8467	4.9794	5.0068	4.8941	5.3777	5.4049	5.307	5.2662	5.3481	5.3899	5.3389	5.2897	5.2471	5.3376	5.3361	5.3051	5.314	5.1299	5.132	5.1222	5.1335	pos_884	metab_881	332.161	1.331	pos	-	-	-	-	-	0.0115273
metab_882	-	-	-	4.8218	4.7044	4.8705	4.5209	4.7126	4.6223	4.6618	4.6767	4.6835	4.7744	4.6982	5.0245	4.9973	4.9665	4.9804	4.9673	5.0177	5.0181	4.9134	4.9059	4.9716	4.995	4.9099	4.9808	4.8488	4.8431	4.8757	4.8568	pos_885	metab_882	336.192	1.331	pos	-	-	-	-	-	0.0331037
metab_883	-	-	-	4.4236	4.4688	4.3327	3.7124	4.0925	3.801	3.7117	3.9736	4.1209	4.0017	3.9632	4.2639	4.5128	4.2773	4.3729	4.3798	4.2366	4.3325	4.3708	4.4436	4.3522	4.2586	4.2304	4.3799	4.2662	4.2618	4.2724	4.1948	pos_886	metab_883	389.203	1.331	pos	-	-	-	-	-	0.080142
metab_884	-	-	-	4.8596	4.9255	4.7905	4.5622	4.9053	4.7577	4.9647	4.8716	4.9773	4.9388	4.9303	5.2793	5.2754	5.1787	5.2339	5.2396	5.1585	5.1908	5.2075	5.25	5.2826	5.2206	5.2859	5.2966	5.0895	5.0936	5.0953	5.097	pos_887	metab_884	110.072	1.3519	pos	-	-	-	-	-	0.00745322
metab_885	-	-	-	5.2365	5.1759	5.2878	5.3534	5.254	5.2622	5.2018	5.3891	5.4638	5.3274	5.2299	5.3491	5.3217	5.2956	5.4166	5.378	5.4634	5.4909	5.5311	5.6223	5.2085	5.3125	5.2569	5.528	5.3401	5.3402	5.3451	5.38	pos_888	metab_885	126.055	1.3519	pos	-	-	-	-	-	0.0452273
metab_886	-	-	-	4.691	4.5552	4.716	4.3817	4.4215	4.1607	4.2986	4.2835	4.3574	4.5464	4.552	4.7322	4.8629	4.8182	4.8617	4.8335	4.909	4.8831	4.8018	4.7952	4.9324	4.889	4.8135	4.8391	4.7611	4.7283	4.7299	4.7289	pos_889	metab_886	342.184	1.3519	pos	-	-	-	-	-	0.0375818
metab_887	-	-	-	4.648	4.7592	4.6441	4.3116	4.5191	4.4064	4.4086	4.5285	4.5567	4.656	4.421	4.8012	4.9263	4.9103	4.8663	4.7978	4.9207	4.8889	4.7241	4.7749	4.9096	4.7592	4.835	4.8316	4.6985	4.7229	4.7047	4.7002	pos_890	metab_887	371.182	1.3519	pos	-	-	-	-	-	0.0260792
metab_888	-	-	-	3.667	3.8191	4.0903	3.3838	3.5766	3.4344	3.8436	3.8752	3.8427	3.9571	3.8814	3.1804	3.7974	3.577	3.1959	4.1936	3.5616	4.0513	3.2999	4.0902	3.8583	3.775	3.6656	3.3897	3.7019	3.5124	3.5586	3.3944	pos_891	metab_888	372.213	1.3519	pos	-	-	-	-	-	0.297389
metab_889	-	-	-	4.3251	4.2046	4.0475	4.0862	4.1643	4.0736	4.2065	3.9115	4.2024	4.3846	4.1525	4.4376	4.4331	4.3722	4.4348	4.3509	4.4395	4.4653	4.3942	4.3216	4.4149	4.3179	4.2483	4.4414	4.3148	4.3138	4.3126	4.3144	pos_892	metab_889	370.197	1.3519	pos	-	-	-	-	-	0.00221864
metab_890	-	-	-	4.573	4.692	4.4764	4.4064	4.6065	4.4367	4.4619	4.4956	4.6204	4.7418	4.4969	4.9043	4.9392	4.9069	4.8913	4.8933	4.9072	4.9934	4.8672	4.8518	4.9454	4.8645	4.8992	4.9399	4.7244	4.7115	4.7588	4.7362	pos_893	metab_890	366.166	1.3519	pos	-	-	-	-	-	0.0465783
metab_891	-	-	-	3.7105	4.0055	3.6156	2.8318	3.7863	3.7026	3.7104	3.7112	3.548	3.6831	3.6502	4.2123	4.4544	4.2835	4.2795	4.3166	4.3616	4.3862	4.1357	4.234	4.3755	4.1667	4.2918	4.2328	4.0808	4.1315	4.131	4.1331	pos_894	metab_891	334.213	1.3519	pos	-	-	-	-	-	0.057097
metab_892	-	-	-	4.9017	4.6455	4.7341	4.7584	4.7066	4.7563	4.6729	4.8037	4.8449	4.8648	4.7188	4.9579	4.8879	4.8566	4.939	4.8466	4.9685	5.0242	4.9875	4.9551	4.7797	4.8922	4.8266	4.9662	4.8131	4.8324	4.8283	4.8339	pos_895	metab_892	168.066	1.3719	pos	-	-	-	-	-	0.0217032
metab_893	-	-	-	4.915	5.0549	4.9677	4.5851	5.045	4.8678	5.1913	4.9782	5.1777	5.0282	5.0847	5.128	5.203	5.1147	5.1205	5.1465	5.2555	5.1247	5.068	5.0799	5.1474	5.0587	5.0943	5.0523	5.0582	5.0649	5.0701	5.072	pos_896	metab_893	173.129	1.3719	pos	-	-	-	-	-	0.014195
metab_894	-	-	-	4.4823	4.5037	4.3607	4.0793	4.5181	4.4288	4.5219	4.3842	4.7453	4.5143	4.4269	4.8028	4.8563	4.7961	4.7698	4.7886	4.8096	4.6974	4.7508	4.7068	4.7884	4.7993	4.7687	4.74	4.6241	4.6334	4.6272	4.6203	pos_897	metab_894	255.145	1.3719	pos	-	-	-	-	-	0.0127064
metab_895	-	-	-	4.6554	4.5634	4.4303	4.2397	4.4509	4.3843	4.376	4.3371	4.4635	4.6079	4.535	4.6461	4.8135	4.7387	4.7161	4.7416	4.7873	4.7999	4.6568	4.7098	4.8279	4.6572	4.6067	4.7515	4.623	4.6054	4.6315	4.6169	pos_898	metab_895	383.182	1.3719	pos	-	-	-	-	-	0.0252727
metab_896	-	-	-	3.5959	3.9028	4.1171	3.6963	3.9893	3.9216	3.7031	3.7392	3.8492	4.0057	3.8914	4.5143	4.3729	4.2645	4.5362	4.4389	4.3953	4.3426	4.2891	4.2667	4.0091	3.7303	4.1415	4.1831	4.1664	4.0904	4.1057	4.0913	pos_899	metab_896	265.086	1.3719	pos	-	-	-	-	-	0.0859854
metab_897	-	-	-	4.2682	4.1398	4.2375	4.0128	4.0633	4.0724	4.1351	4.042	4.1907	4.2926	3.9759	4.1772	4.1133	4.1295	4.0805	4.0698	4.1882	4.0892	4.1878	4.0082	4.1906	4.1839	4.1774	4.1594	4.1203	4.1397	4.1383	4.1387	pos_900	metab_897	124.112	1.3931	pos	-	-	-	-	-	0.021215
metab_898	-	-	-	4.6209	4.596	4.4808	4.2935	4.5818	4.2962	4.5117	4.4554	4.6023	4.5652	4.5282	5.0121	5.0531	5.0196	4.9906	5.0468	5.0705	5.0892	4.9232	4.9112	4.9715	4.9127	4.8981	4.9227	4.7687	4.769	4.8214	4.7703	pos_901	metab_898	346.176	1.3719	pos	-	-	-	-	-	0.0616485
metab_899	-	-	-	4.6202	3.9079	4.533	3.5993	3.9104	4.1474	3.9033	3.9728	3.8461	4.4631	3.8914	2.9611	3.5859	3.1855	3.34	3.5696	3.5777	3.5286	3.6549	3.6814	3.7972	3.9212	3.0763	4.2178	3.9927	3.9929	4.0482	3.9943	pos_902	metab_899	205.155	1.3931	pos	-	-	-	-	-	0.0651621
metab_900	-	-	-	3.7482	3.928	3.4429	3.4838	3.9951	3.5363	3.8794	3.738	3.4982	4.0099	3.7227	4.459	4.4861	4.304	4.3538	4.2491	4.4259	4.4732	4.3895	4.3328	4.4074	4.4352	4.4886	4.3448	4.0662	4.0921	4.1587	4.0713	pos_903	metab_900	232.083	1.3931	pos	-	-	-	-	-	0.101879
metab_901	-	-	-	4.0454	3.952	3.9475	3.8137	3.9999	3.9274	3.92	3.9067	4.027	4.0265	3.9603	4.6108	4.31	4.3608	4.3396	4.2686	4.5486	4.6616	4.6241	4.4923	4.3413	4.3182	4.5831	4.5642	4.0895	4.0911	4.0015	4.0919	pos_904	metab_901	469.145	1.3931	pos	-	-	-	-	-	0.0974705
metab_902	-	-	-	4.3652	4.1349	4.3022	3.6933	4.3287	4.3225	4.1364	4.2387	4.2099	4.3565	4.2985	4.0039	3.9876	4.1665	3.9003	4.1281	3.9379	3.9792	3.9217	3.6894	3.9929	4.0557	3.7171	3.6789	4.0731	4.0706	4.0713	3.8599	pos_905	metab_902	483.245	1.3931	pos	-	-	-	-	-	0.213615
metab_903	-	-	-	4.777	4.7711	4.6574	4.3865	4.727	4.6949	4.7596	4.6602	4.8215	4.8504	4.7085	5.0833	5.0784	5.0393	5.0542	5.02	5.1239	5.0358	5.0779	5.0049	5.1451	5.0745	5.063	5.0637	4.8893	4.909	4.9008	4.9244	pos_906	metab_903	203.118	1.4144	pos	-	-	-	-	-	0.0341264
metab_904	-	-	-	4.8377	4.7726	4.6876	4.6691	4.8905	4.7784	4.8273	4.7045	4.9588	4.9011	4.802	5.0057	4.9904	5.0175	4.9957	4.9446	5.0775	4.9437	5.0197	4.9096	4.9643	4.9657	5.0014	5.0193	4.9006	4.8888	4.8996	4.9023	pos_907	metab_904	236.092	1.4144	pos	-	-	-	-	-	0.0140546
metab_905	-	-	-	4.6552	4.6177	4.5353	4.3914	4.2402	3.9771	4.1596	4.0382	4.1553	4.1866	4.4756	4.2565	4.1217	4.3085	4.5404	4.0869	4.339	4.0862	4.1488	4.1109	4.096	4.0865	4.0847	4.1741	4.2652	4.2443	4.2549	4.2606	pos_908	metab_905	278.114	1.4144	pos	-	-	-	-	-	0.0206157
metab_906	-	-	-	4.341	4.2025	4.1075	4.0048	4.1999	3.9729	4.1076	3.9988	4.0977	4.2151	4.1732	4.3879	4.5645	4.5561	4.3681	4.4196	4.4814	4.4835	4.2751	4.1506	4.4734	4.428	4.4059	4.364	4.2337	4.2793	4.2661	4.2805	pos_909	metab_906	289.118	1.4144	pos	-	-	-	-	-	0.0492233
metab_907	-	-	-	4.8694	4.784	4.5338	4.5549	4.7929	4.4585	4.5994	4.6034	4.7705	4.8163	4.6729	5.0459	5.1101	5.026	5.0241	5.0503	5.1232	5.0614	4.9609	4.9566	5.1422	5.0323	4.9983	4.976	4.8789	4.879	4.8787	4.837	pos_910	metab_907	300.144	1.4144	pos	-	-	-	-	-	0.0470166
metab_908	-	-	-	5.155	5.0962	5.0118	4.8172	4.7885	4.9987	4.4632	4.9887	4.8876	5.0358	5.0067	5.0405	4.8721	4.8888	4.8817	5.0214	4.9977	5.0366	4.9575	4.8439	4.9152	5.0068	5.0405	4.9373	4.8914	4.8881	4.9379	4.8893	pos_911	metab_908	341.157	1.4144	pos	-	-	-	-	-	0.0572463
metab_909	-	-	-	4.2974	4.1664	3.8043	3.9582	4.2703	4.0881	3.8398	4.1913	3.9137	4.2892	3.9464	4.7897	4.5768	4.7556	4.7175	4.7025	4.6109	4.6737	4.6475	4.5604	4.6876	4.6547	4.6117	4.5155	4.4079	4.3838	4.4087	4.3372	pos_912	metab_909	383.192	1.4144	pos	-	-	-	-	-	0.0750794
metab_910	-	-	-	4.311	4.2787	3.985	3.797	4.2313	4.0344	3.8952	3.9391	4.0874	4.3167	4.251	4.6915	4.724	4.7346	4.6781	4.6615	4.6742	4.659	4.6816	4.4366	4.62	4.6419	4.628	4.5678	4.4271	4.437	4.434	4.4179	pos_913	metab_910	394.161	1.4144	pos	-	-	-	-	-	0.019427
metab_911	-	-	-	5.0396	5.1372	5.1847	5.1089	5.1541	5.0655	5.0761	5.1389	5.2593	5.1204	5.114	5.2314	5.1403	5.2645	5.0866	5.1595	5.2575	5.2252	5.2014	5.1732	5.2547	5.1476	5.1848	5.2257	5.1484	5.1417	5.1413	5.1431	pos_914	metab_911	338.171	1.4144	pos	-	-	-	-	-	0.00758347
metab_912	-	-	-	4.9391	4.8115	4.7593	4.1476	4.6654	4.5508	4.8862	4.6178	5.0145	4.9045	4.7938	4.319	4.4546	4.2295	4.4644	4.4361	4.8381	4.4316	4.7417	4.576	4.3752	4.4422	4.3499	4.3461	4.6542	4.6574	4.6951	4.6561	pos_915	metab_912	156.138	1.4355	pos	-	-	-	-	-	0.0461819
Lotaustralin	C08334	HMDB0033865	C11H19NO6	4.7088	4.5595	4.2832	4.3788	4.7933	4.7544	4.6573	4.7037	4.6565	4.7624	3.9781	4.8623	4.7723	4.7604	4.7982	4.6489	4.6056	4.7518	4.8624	4.6897	4.7523	4.4989	4.9488	4.7411	4.5937	4.6275	4.6271	4.6238	pos_916	metab_913	244.118	1.4355	pos	M+H-H2O, M+Na	-	70.6	0.304649	534-67-8	0.036822
metab_914	-	-	-	3.6336	3.8563	3.789	3.3078	3.8063	3.6178	3.7495	3.9055	3.8342	3.8741	3.8191	4.8366	4.8504	4.889	4.7903	4.8147	4.9186	4.8341	4.7513	4.7545	4.862	4.6956	4.7823	4.7337	4.5106	4.5132	4.5162	4.518	pos_917	metab_914	339.202	1.4355	pos	-	-	-	-	-	0.00753241
metab_915	-	-	-	4.2006	4.2999	4.5115	4.5007	4.1622	4.126	3.8987	4.3308	4.5613	4.2064	4.146	3.2066	3.2538	4.3538	3.6867	3.645	3.4955	3.7159	3.5686	3.9882	3.7644	3.6643	3.4126	3.2159	4.0339	4.0161	4.0328	3.9678	pos_918	metab_915	357.192	1.4355	pos	-	-	-	-	-	0.0693047
metab_916	-	-	-	4.8518	4.8128	4.5994	4.4714	4.7942	4.6968	4.724	4.7041	4.7931	4.8499	4.6913	5.2017	5.2405	5.2078	5.2091	5.218	5.1897	5.2186	5.2072	5.188	5.2576	5.2309	5.216	5.229	5.0096	5.0062	5.0197	5.0077	pos_919	metab_916	284.161	1.4355	pos	-	-	-	-	-	0.0141727
metab_917	-	-	-	4.6786	4.5969	4.3502	4.2224	4.6076	4.2561	4.4851	4.4562	4.626	4.6549	4.5653	4.6448	4.6899	4.8465	4.6219	4.642	4.5858	4.7335	4.6341	4.7889	4.9743	4.955	4.7613	4.7561	4.6055	4.6277	4.6205	4.6159	pos_920	metab_917	319.096	1.4144	pos	-	-	-	-	-	0.0214259
metab_918	-	-	-	5.8353	5.8158	5.8093	5.8346	5.8235	5.7955	5.9737	5.7341	5.9607	5.8577	5.9564	5.5724	5.5094	5.4708	5.5521	5.7685	5.7124	5.7534	5.8028	5.8426	5.7526	5.7993	5.771	5.8753	5.7855	5.8274	5.8356	5.8376	pos_921	metab_918	118.066	1.4548	pos	-	-	-	-	-	0.0547894
Cinnamic acid	C10438	HMDB0000567	C9H8O2	5.5514	5.51	5.4785	5.4831	5.5708	5.5334	5.6031	5.5639	5.6221	5.603	5.6507	5.4324	5.3594	5.2534	5.4463	5.5029	5.5015	5.5646	5.6644	5.5849	5.4275	5.4454	5.4437	5.6313	5.5393	5.5396	5.5522	5.541	pos_922	metab_919	166.086	1.4548	pos	M+H-H2O, M+NH4	-	56.4	1.03583	621-82-9	0.0143032
metab_920	-	-	-	4.9102	4.8927	5.0649	4.5988	4.8082	4.8828	4.8287	4.7582	5.0408	4.915	4.7968	5.1411	5.2259	5.1664	5.0375	5.049	5.169	5.1062	5.088	5.0661	5.2437	5.131	5.2254	4.9974	5.0315	5.0062	5.0061	5.0155	pos_923	metab_920	223.144	1.4548	pos	-	-	-	-	-	0.0277767
metab_921	-	-	-	4.425	3.9633	4.6462	3.9284	4.1796	4.1524	3.8903	3.8054	4.1143	4.02	3.2856	4.7521	4.7003	4.5875	4.5285	4.4969	4.5866	4.5307	4.4523	4.3999	4.6038	4.5691	4.5759	4.3009	4.4158	4.3133	4.3998	4.4268	pos_924	metab_921	248.176	1.4548	pos	-	-	-	-	-	0.112702
metab_922	-	-	-	5.6322	5.8474	6.2002	6.1689	5.8483	5.7972	5.6145	6.0423	6.1208	5.9005	5.8773	5.3328	5.3288	5.7735	5.6043	5.5956	5.4034	5.338	5.2572	5.7697	5.3187	5.2341	5.2667	5.3031	5.7772	5.7661	5.7678	5.7648	pos_925	metab_922	355.187	1.4548	pos	-	-	-	-	-	0.0129994
metab_923	-	-	-	4.2709	4.3663	4.3645	3.9906	4.3535	4.3649	4.4745	4.328	4.4891	4.3508	4.4296	4.7194	4.6968	4.6357	4.5604	4.5655	4.6352	4.6544	4.5058	4.4998	4.6353	4.5805	4.699	4.5904	4.4545	4.4687	4.4911	4.4155	pos_926	metab_923	214.119	1.4548	pos	-	-	-	-	-	0.0721665
metab_924	-	-	-	4.9898	4.9517	4.8315	4.7121	4.9228	4.8035	4.8902	4.8628	5.0344	4.9922	4.8527	5.3453	5.242	5.1906	5.2113	5.1356	5.2245	5.226	5.261	5.1705	5.148	5.1323	5.1969	5.2686	5.0675	5.0514	5.0703	5.0721	pos_927	metab_924	209.092	1.4548	pos	-	-	-	-	-	0.0216105
metab_925	-	-	-	5.0826	5.0131	4.9177	4.9081	5.2877	5.347	5.1718	5.1482	5.4631	5.3682	5.1447	5.4143	5.3179	5.3594	5.3642	5.1597	5.2386	5.1863	5.259	5.1416	5.208	5.2228	5.3386	5.1657	5.2204	5.2166	5.2194	5.2221	pos_928	metab_925	162.055	1.4548	pos	-	-	-	-	-	0.0053506
metab_926	-	-	-	5.5439	5.5784	5.512	5.1583	5.4152	5.3743	5.3941	5.3861	5.5046	5.5164	5.3861	5.5938	5.5557	5.599	5.5121	5.5451	5.6569	5.5549	5.512	5.5125	5.5573	5.5098	5.5244	5.56	5.4742	5.4942	5.4957	5.4918	pos_929	metab_926	267.134	1.4727	pos	-	-	-	-	-	0.0226703
metab_927	-	-	-	5.095	5.0032	4.9211	4.8732	5.0198	4.9231	4.8866	4.9448	4.9897	5.1391	4.8668	5.305	5.2514	5.2319	5.2098	5.0924	5.2099	5.192	5.1483	5.0972	5.2308	5.1484	5.2201	5.202	5.0644	5.0656	5.0764	5.0511	pos_930	metab_927	319.129	1.4727	pos	-	-	-	-	-	0.0238604
metab_928	-	-	-	4.5582	4.5919	4.5015	3.8668	4.5561	4.5484	4.509	4.4978	4.5661	4.6965	4.5177	4.2897	4.2224	4.2354	4.1604	4.0612	4.1869	4.1682	4.0317	4.0558	4.1958	4.0642	4.1509	4.122	4.3523	4.3729	4.3724	4.3689	pos_931	metab_928	154.05	1.4939	pos	-	-	-	-	-	0.0220643
metab_929	-	-	-	5.5099	5.53	5.4342	5.2227	5.4735	5.3711	5.3712	5.3922	5.4654	5.4709	5.3951	5.5261	5.4985	5.4883	5.4481	5.4452	5.5707	5.4968	5.4142	5.3911	5.5228	5.4037	5.3822	5.4318	5.4215	5.4289	5.4365	5.4337	pos_932	metab_929	281.15	1.4727	pos	-	-	-	-	-	0.0150685
metab_930	-	-	-	5.3144	5.1753	4.7599	4.6301	5.0441	5.1776	5.0655	4.9137	5.2415	5.2943	4.5663	4.906	4.8253	4.8575	4.7898	4.7664	4.9028	4.8662	4.934	4.7833	4.8585	4.7691	4.9418	4.936	4.9477	4.9768	4.9697	4.9781	pos_933	metab_930	226.107	1.4939	pos	-	-	-	-	-	0.0319922
metab_931	-	-	-	2.966	2.7754	2.9136	2.154	2.2763	2.275	3.3133	2.1836	3.3519	2.3028	2.9064	3.7624	3.1749	3.5556	3.4807	3.5308	3.5947	3.1557	3.203	3.0929	3.1057	2.7423	3.4277	3.0957	3.0003	3.0203	3.047	3.0012	pos_934	metab_931	234.097	1.4939	pos	-	-	-	-	-	0.0512314
metab_932	-	-	-	4.827	4.8986	4.8	3.9981	4.8365	4.78	4.6857	4.671	4.77	4.9794	4.7739	4.314	4.3527	4.4027	4.3632	4.2526	4.2929	4.3077	4.1596	4.1652	4.3784	4.2866	4.235	4.2819	4.5643	4.5828	4.5703	4.5662	pos_935	metab_932	228.05	1.4939	pos	-	-	-	-	-	0.0192908
metab_933	-	-	-	5.7277	5.5206	6.0028	5.0463	5.2404	5.2112	5.2066	5.2315	5.4578	5.3047	5.3285	5.1412	5.2055	5.1927	5.1781	5.1616	5.2657	5.2486	5.1646	5.1532	5.3435	5.2191	5.2177	5.2564	5.3491	5.3529	5.3509	5.3438	pos_936	metab_933	295.165	1.4939	pos	-	-	-	-	-	0.00900682
metab_934	-	-	-	4.4375	4.4966	4.3369	4.0821	4.4175	4.2708	4.2919	4.3119	4.3851	4.5923	4.1475	5.0559	4.6702	4.7545	4.5631	4.6135	4.8656	4.8022	5.0164	4.9685	4.8659	4.7763	4.6636	5.1157	4.5794	4.6254	4.6251	4.6269	pos_937	metab_934	375.158	1.4939	pos	-	-	-	-	-	0.0520515
metab_935	-	-	-	4.2099	4.111	4.1424	3.6256	4.2095	3.989	4.2292	3.964	4.1292	4.2049	4.0646	5.7981	5.7015	4.6153	4.6148	5.6203	5.4794	5.0495	4.9968	5.0437	5.158	5.0074	5.0137	5.0652	5.0165	5.0192	5.0279	5.0184	pos_938	metab_935	224.078	1.4939	pos	-	-	-	-	-	0.0116886
metab_936	-	-	-	4.9671	5.1444	5.1055	4.7954	5.2108	5.115	5.4394	5.2311	5.3788	5.0785	5.4556	5.1432	5.0863	4.9054	5.0681	5.0332	5.344	5.0351	5.1646	5.1433	5.0752	4.9553	5.0719	5.0214	5.1176	5.1351	5.1347	5.1364	pos_939	metab_936	132.102	1.515	pos	-	-	-	-	-	0.0203742
metab_937	-	-	-	2.9128	3.3246	3.009	2.6809	3.105	3.0196	2.6727	2.9458	2.3783	2.9566	2.9717	3.2226	3.4419	3.5363	3.1107	3.3442	3.0823	3.4462	3.436	3.0727	2.8304	3.361	3.3642	3.3548	3.3252	3.3254	3.3248	3.3976	pos_940	metab_937	180.113	1.515	pos	-	-	-	-	-	0.0868665
metab_938	-	-	-	4.0241	4.1136	4.23	3.7818	4.6548	4.6917	4.5797	4.8642	4.8429	4.5766	4.764	4.3345	4.1706	4.2658	4.2177	4.3029	4.4777	4.1304	4.3949	4.1427	4.3643	4.0479	4.2019	4.3071	4.3637	4.3641	4.4078	4.379	pos_941	metab_938	234.113	1.515	pos	-	-	-	-	-	0.0484163
metab_939	-	-	-	3.8304	2.758	3.6047	3.9229	3.7161	3.8217	2.9752	2.7127	2.8993	3.4419	3.4871	3.7113	3.924	3.864	3.8642	3.8987	3.8223	3.2699	3.0894	3.4189	2.858	3.1858	3.3065	2.8504	3.3942	3.3679	3.3928	3.2664	pos_942	metab_939	278.123	1.515	pos	-	-	-	-	-	0.130598
Tryptophyl-Arginine	-	HMDB0029077	C17H24N6O3	5.082	5.5438	5.2683	4.5947	4.843	4.7482	4.6646	5.0424	4.8058	5.0529	5.0065	5.2105	5.2615	5.2237	5.2426	5.2478	5.1723	5.2981	5.2099	5.1448	5.2416	5.2436	5.2215	5.2619	5.1345	5.1292	5.1395	5.1421	pos_943	metab_940	325.176	1.515	pos	M+H-2H2O, M+CH3OH+H	-	69.6	-3.06452	-	0.013107
metab_941	-	-	-	4.7316	4.5716	5.0639	4.2065	4.2096	4.0825	3.9837	4.3329	4.2977	4.5431	4.1582	4.2805	3.7657	3.7774	4.1739	4.0177	4.2704	4.4328	4.5821	4.3872	4.6481	4.3956	4.238	4.3806	4.4237	4.4326	4.4673	4.4257	pos_944	metab_941	323.197	1.515	pos	-	-	-	-	-	0.0478625
metab_942	-	-	-	4.6746	4.6669	4.5498	4.3351	4.7018	4.648	4.6187	4.4123	4.6399	4.7344	4.6786	4.3759	4.6795	4.2854	4.6166	4.7089	5.1293	4.6986	4.5706	4.7979	4.404	4.4028	4.257	4.4784	4.5781	4.5812	4.6109	4.5839	pos_945	metab_942	356.171	1.515	pos	-	-	-	-	-	0.0353419
metab_943	-	-	-	4.3732	4.16	4.1124	4.5308	4.1646	4.2178	4.6103	4.2617	4.7095	4.2182	4.1906	3.7861	3.7592	3.8608	3.4398	3.8882	4.0141	3.738	4.1329	4.0919	3.8385	4.1308	4.0654	4.1941	3.9905	3.9746	3.9733	4.0159	pos_946	metab_943	409.147	1.515	pos	-	-	-	-	-	0.0463232
metab_944	-	-	-	3.7954	3.7692	3.73	3.5988	3.5636	3.6363	3.5857	3.7664	3.6909	3.7528	3.657	3.2604	3.3292	3.2477	3.2161	3.3077	3.3805	3.2813	3.3672	3.3212	3.2979	3.3672	3.3066	3.2253	3.4786	3.4622	3.4737	3.4804	pos_947	metab_944	85.0654	1.5367	pos	-	-	-	-	-	0.0187991
metab_945	-	-	-	4.6773	4.5237	4.5463	4.5422	4.4276	4.4754	4.5566	4.5021	4.6889	4.5653	4.4559	4.3619	4.2677	4.245	4.2594	4.2627	4.33	4.3704	4.444	4.3178	4.3127	4.3268	4.2779	4.3641	4.3598	4.3924	4.4006	4.4025	pos_948	metab_945	116.035	1.5367	pos	-	-	-	-	-	0.0447499
metab_946	-	-	-	5.0949	4.96	4.909	4.7983	5.1488	4.9954	5.0882	5.0968	5.1033	5.0476	5.133	5.034	5.189	5.1754	5.1608	5.1904	5.0815	5.1888	4.8799	5.088	5.1554	5.0212	5.082	5.0617	5.0371	5.0375	5.03	4.993	pos_949	metab_946	509.276	1.515	pos	-	-	-	-	-	0.0477621
metab_947	-	-	-	4.1172	4.0638	3.9448	3.9284	4.1059	4.0008	4.1109	3.8896	4.1604	4.2318	4.1462	4.2733	4.2148	4.2741	4.3147	4.2219	4.2533	4.2842	4.1385	4.0683	4.2632	4.1238	4.2543	4.1943	4.0984	4.1475	4.1175	4.1035	pos_950	metab_947	208.061	1.5367	pos	-	-	-	-	-	0.0516316
metab_948	-	-	-	5.4619	5.5289	5.5021	5.2572	5.5087	5.4158	5.6699	5.5028	5.7149	5.5161	5.5963	5.9499	5.576	5.5138	5.5472	5.5763	5.827	5.6494	5.8332	5.8164	5.7218	5.6086	5.7007	5.6028	5.6112	5.6115	5.6162	5.618	pos_951	metab_948	201.124	1.5367	pos	-	-	-	-	-	0.00784743
metab_949	-	-	-	4.0765	4.1455	4.0665	3.9223	4.2043	4.1279	4.2891	4.1726	4.2545	4.084	4.365	4.2089	4.3365	4.2553	4.2914	4.3775	4.4665	4.2687	4.2325	4.2885	4.2139	4.3296	4.3032	4.2453	4.2226	4.2229	4.2229	4.2483	pos_952	metab_949	288.171	1.5367	pos	-	-	-	-	-	0.0297839
metab_950	-	-	-	4.7886	4.7531	4.9464	4.6174	4.6674	4.8107	4.6825	4.7284	4.7358	4.8168	4.775	5.0826	5.0307	5.038	4.8764	4.8586	5.0009	4.887	4.8846	4.7744	4.9505	4.8975	4.9668	4.9302	4.8493	4.8464	4.8551	4.8492	pos_953	metab_950	336.192	1.5367	pos	-	-	-	-	-	0.00844756
metab_951	-	-	-	5.2027	5.129	5.2263	5.0711	5.2695	5.2338	5.2692	5.154	5.1021	5.3904	5.0763	5.1819	4.9958	5.0224	5.1343	5.4083	5.0613	5.116	5.0872	5.1115	5.0971	5.1281	5.1371	5.1564	5.1263	5.1266	5.1248	5.1221	pos_954	metab_951	359.181	1.5367	pos	-	-	-	-	-	0.00474421
metab_952	-	-	-	4.3398	4.396	4.2191	4.1827	4.3418	4.177	4.0755	4.1038	4.1437	4.4218	4.19	4.0879	4.4373	4.1526	4.3563	4.1885	4.1767	4.4553	4.1296	4.1793	4.1824	4.4259	4.262	4.2255	4.1929	4.1551	4.1695	4.1619	pos_955	metab_952	425.24	1.5367	pos	-	-	-	-	-	0.0383059
metab_953	-	-	-	3.8641	4.1145	4.273	4.1185	4.2098	3.9454	4.4881	4.5996	4.4524	4.0819	4.1962	3.5702	3.6544	3.2316	4.0246	4.2027	4.5543	4.1782	4.3847	4.4001	3.9675	3.6785	3.5324	4.0825	4.1445	4.1506	4.1583	4.1488	pos_956	metab_953	389.24	1.5367	pos	-	-	-	-	-	0.0132662
metab_954	-	-	-	5.0234	5.0767	4.9885	4.7703	4.9613	4.8558	4.9478	4.946	5.0451	5.0598	4.9402	5.2869	5.1976	5.1916	5.1692	5.1971	5.2685	5.2398	5.1826	5.1548	5.2747	5.2957	5.1888	5.2179	5.111	5.1057	5.1259	5.0984	pos_957	metab_954	321.145	1.5564	pos	-	-	-	-	-	0.0269264
metab_955	-	-	-	4.3286	4.7144	4.4029	3.9574	4.204	4.1844	3.9074	4.1464	3.8399	4.452	4.1817	3.9503	4.1545	4.1238	3.9708	4.1625	4.3307	4.2655	3.9797	4.0119	4.1577	4.3414	4.2572	4.1523	4.2231	4.2747	4.2801	4.2704	pos_958	metab_955	346.212	1.5564	pos	-	-	-	-	-	0.058837
metab_956	-	-	-	4.6546	4.7341	4.7517	4.2245	4.4782	4.4277	4.3974	4.5521	4.4243	4.6874	4.5654	4.5464	4.6495	4.5947	4.6589	4.6379	4.6979	4.7185	4.7412	4.6992	4.8796	4.7589	4.5833	4.7593	4.5721	4.5767	4.5782	4.5739	pos_959	metab_956	404.218	1.5564	pos	-	-	-	-	-	0.0062795
metab_957	-	-	-	4.6409	4.831	4.8039	4.1872	4.6604	4.4584	4.0446	4.7926	3.7233	4.5813	4.8067	4.0222	4.0184	3.9903	3.8242	3.5975	4.1289	3.883	4.0344	3.4421	4.118	4.0288	3.681	3.9381	4.3548	4.3659	4.3656	4.3268	pos_960	metab_957	442.255	1.5564	pos	-	-	-	-	-	0.0416082
metab_958	-	-	-	5.4821	5.514	5.4168	5.2503	5.3819	5.328	5.3428	5.3537	5.3765	5.4891	5.388	5.0737	5.175	5.0997	5.2082	5.3511	5.183	5.4645	5.4777	5.4036	5.4985	5.4659	5.3543	5.4415	5.3404	5.3423	5.3499	5.3358	pos_961	metab_958	395.203	1.5564	pos	-	-	-	-	-	0.0135435
metab_959	-	-	-	4.8837	4.8523	4.8869	4.4385	4.7805	4.6549	4.8599	4.7818	4.957	4.642	4.8422	5.3032	5.419	5.3048	5.2667	5.2473	5.3729	5.3177	5.2581	5.3421	5.4265	5.3102	5.3482	5.1841	5.1027	5.0996	5.1084	5.1076	pos_962	metab_959	177.139	1.5785	pos	-	-	-	-	-	0.00963783
metab_960	-	-	-	5.0887	4.9819	4.8893	4.6661	5.0569	4.9527	5.0772	4.9698	5.1304	5.1439	5.0441	5.2643	5.1825	5.2288	5.1663	5.1794	5.3221	5.1846	5.1845	5.1899	5.2525	5.1844	5.1897	5.1899	5.0992	5.112	5.109	5.1134	pos_963	metab_960	211.144	1.5785	pos	-	-	-	-	-	0.0147098
metab_961	-	-	-	4.6335	4.7516	4.4602	4.3545	4.5699	4.4848	4.6339	4.4616	4.6084	4.687	4.5282	4.8309	4.7415	4.793	4.7388	4.6848	4.8654	4.7462	4.9085	4.8438	4.8258	4.8053	4.6622	4.9268	4.629	4.6714	4.6708	4.6611	pos_964	metab_961	252.134	1.5785	pos	-	-	-	-	-	0.0450725
metab_962	-	-	-	4.6393	4.5641	4.4583	4.4223	4.5842	4.5003	4.6063	4.4747	4.6576	4.6308	4.512	4.939	4.834	4.7719	4.7953	4.7467	4.8555	4.8425	4.8509	4.7539	4.8513	4.7883	4.8538	4.8159	4.6671	4.6949	4.7005	4.6887	pos_965	metab_962	263.103	1.5785	pos	-	-	-	-	-	0.033233
metab_963	-	-	-	4.866	4.9374	4.8823	4.6128	4.8117	4.7218	4.7595	4.7134	4.8185	4.8737	4.8302	5.0643	5.0528	5.0497	4.993	5.0345	5.0917	5.0603	4.9754	4.9748	5.1208	5.006	5.0322	5.0071	4.8973	4.9221	4.9218	4.9237	pos_966	metab_963	346.176	1.5785	pos	-	-	-	-	-	0.0287047
metab_964	-	-	-	4.0725	3.8583	3.3856	3.7828	4.1532	4.2189	3.4667	3.9535	3.0768	4.2474	3.933	3.8898	4.1036	3.8016	3.5838	3.8891	3.9846	4.1389	3.949	4.0057	4.1182	4.0677	4.0977	3.9082	3.8846	3.8038	3.8549	3.7152	pos_967	metab_964	423.224	1.5785	pos	-	-	-	-	-	0.163638
Digoxigenin	-	HMDB0060731;LMST01120008	C23H34O5	4.9932	5.1932	5.2886	4.4201	4.5051	4.5121	4.126	4.7226	4.1976	4.7754	4.7487	3.4336	3.4966	3.8238	3.2863	3.7009	4.0478	4.3178	4.0059	4.1103	4.3327	4.2116	3.887	4.0757	4.5471	4.5651	4.5524	4.5295	pos_968	metab_965	454.255	1.5785	pos	M+K, M+ACN+Na	-	51.8	4.99681	-	0.0338537
metab_966	-	-	-	3.337	3.6411	3.4162	3.2667	3.3666	3.3154	3.3508	3.3555	3.4225	3.3121	3.5199	2.5733	3.0513	2.5779	3.1444	2.7629	2.5824	3.2367	2.536	3.3634	3.1359	3.1809	3.2404	2.5826	3.2162	3.2437	3.2896	3.1831	pos_969	metab_966	130.123	1.6	pos	-	-	-	-	-	0.10473
metab_967	-	-	-	2.0645	2.3468	1.9677	2.2325	2.0195	1.9477	2.9435	2.9753	2.8711	2.0459	1.9802	3.6554	3.574	3.5027	3.6637	3.6464	3.4655	3.4964	3.5545	3.4718	3.3619	3.4727	3.4511	3.3142	3.3263	3.2612	3.3507	3.2484	pos_970	metab_967	133.084	1.6	pos	-	-	-	-	-	0.114535
metab_968	-	-	-	3.853	3.8112	3.7997	3.5876	3.8954	3.8236	3.7798	3.7872	3.9598	4.0089	3.7641	4.2526	4.215	4.2289	4.2551	4.2711	4.0872	4.1807	4.2274	4.2208	4.1803	4.1501	4.2965	4.1894	4.0264	4.0281	4.0371	4.0347	pos_971	metab_968	106.066	1.6	pos	-	-	-	-	-	0.011854
metab_969	-	-	-	5.258	5.0152	4.9519	4.7917	5.3857	5.1793	5.26	5.1139	5.3473	5.3106	5.2017	6.2131	6.1417	6.2033	6.243	6.2986	5.9761	6.0987	6.1581	6.1564	6.0924	6.0373	6.2183	6.1498	5.8455	5.8454	5.87	5.8475	pos_972	metab_969	148.112	1.6	pos	-	-	-	-	-	0.0280123
metab_970	-	-	-	4.556	4.5907	4.4215	4.2872	4.5685	4.5501	4.542	4.4159	4.6724	4.5879	4.4684	5.412	5.3477	5.3674	5.4035	5.4546	5.139	5.296	5.3327	5.3182	5.3267	5.2568	5.4218	5.3444	5.0783	5.0667	5.0958	5.0696	pos_973	metab_970	176.126	1.6	pos	-	-	-	-	-	0.0304604
metab_971	-	-	-	5.7545	5.2342	5.2613	5.0199	5.205	5.0854	5.2075	5.0977	5.3155	5.1926	5.1703	5.429	5.437	5.4368	5.4385	5.392	5.5231	5.4513	5.4472	5.4447	5.8999	5.6099	5.4698	5.434	5.3755	5.3685	5.404	5.3848	pos_974	metab_971	235.144	1.6	pos	-	-	-	-	-	0.0357069
metab_972	-	-	-	4.4655	5.3375	4.9426	4.4628	4.8148	5.1559	5.3688	5.1784	5.5443	5.272	4.4848	4.587	4.0529	4.4156	4.1859	3.9237	4.2988	4.3954	5.7719	4.7737	4.5736	4.9452	5.1134	5.1531	5.0439	5.0152	5.0246	5.0167	pos_975	metab_972	290.16	1.6	pos	-	-	-	-	-	0.0307066
metab_973	-	-	-	4.8586	4.8057	4.8922	4.5721	4.8829	4.7022	4.6873	4.7545	4.9071	4.9177	4.8435	5.4658	5.5064	5.476	5.4786	5.5138	5.5519	5.4071	5.3044	5.3347	5.4936	5.3176	5.3903	5.3552	5.2249	5.2285	5.2316	5.2266	pos_976	metab_973	347.16	1.6	pos	-	-	-	-	-	0.00660541
metab_974	-	-	-	4.3651	4.3244	3.9239	4.084	4.3112	4.2174	4.2195	4.327	4.1372	4.5076	4.2262	5.0967	5.1267	5.1193	5.1785	5.2037	4.9712	5.0802	5.2158	5.1722	4.9428	4.9781	5.0852	5.1941	4.8163	4.7621	4.7787	4.7346	pos_977	metab_974	384.159	1.6	pos	-	-	-	-	-	0.0792901
metab_975	-	-	-	3.681	4.3529	4.5101	3.3774	4.5934	4.1561	4.4815	4.8704	4.8146	4.3195	4.4268	4.3973	4.2113	4.4185	4.4037	4.4032	4.2269	4.2849	4.3161	4.4931	4.2145	4.2828	4.268	4.344	4.3233	4.3252	4.3254	4.2194	pos_978	metab_975	397.197	1.6	pos	-	-	-	-	-	0.11376
metab_976	-	-	-	4.7674	4.8632	4.7749	4.5142	4.7314	4.587	4.6621	4.7043	4.6813	4.8655	4.6993	4.993	4.9757	5.0996	5.0752	5.0962	5.0967	5.1472	4.8937	4.989	5.0888	5.0329	5.0497	5.0136	4.9292	4.9294	4.9442	4.9309	pos_979	metab_976	386.174	1.6	pos	-	-	-	-	-	0.0167498
metab_977	-	-	-	5.6463	5.5335	6.0255	5.5811	5.5123	5.4524	5.4513	5.562	5.2742	5.6089	5.5551	4.8217	4.9738	4.9158	4.9622	4.9173	5.0513	5.0943	5.0655	5.0797	5.3049	5.2633	5.0777	5.1337	5.4113	5.4092	5.4112	5.3987	pos_980	metab_977	322.212	1.6	pos	-	-	-	-	-	0.0137046
metab_978	-	-	-	4.588	4.3672	4.7258	4.0001	4.1504	4.0216	4.2483	3.9912	4.1581	4.2986	4.3764	4.7125	4.8647	4.8795	4.7618	4.768	4.8717	4.8087	4.7769	4.7579	4.8512	4.8396	4.7893	4.7514	4.589	4.6261	4.6264	4.6168	pos_981	metab_978	316.202	1.6	pos	-	-	-	-	-	0.0399196
metab_979	-	-	-	4.6005	4.5452	4.4182	4.4554	4.539	4.4374	4.5308	4.5024	4.6375	4.5975	4.3167	4.8839	4.8728	4.841	4.855	4.8769	4.9404	4.8971	4.8073	4.851	4.983	4.9203	4.8955	4.7933	4.7051	4.6859	4.7049	4.7068	pos_982	metab_979	287.139	1.6	pos	-	-	-	-	-	0.0225834
metab_980	-	-	-	4.117	4.1076	4.1578	3.8278	4.0348	3.9702	4.0638	3.9122	4.1184	3.9281	4.0686	4.3372	4.2917	4.2921	4.2213	4.3698	4.4683	4.304	4.2824	4.3414	4.4121	4.3509	4.4376	4.3105	4.2002	4.2072	4.2087	4.1826	pos_983	metab_980	209.165	1.6195	pos	-	-	-	-	-	0.0272288
metab_981	-	-	-	4.9651	4.9936	5.0295	4.6604	4.8712	4.7827	4.8239	4.733	4.7873	5.0393	4.8667	5.2162	5.2114	5.1645	5.0862	5.1182	5.192	5.1146	5.1417	5.1319	5.2688	5.1831	5.1503	5.1396	5.0323	5.0326	5.0618	5.0399	pos_984	metab_981	279.17	1.6	pos	-	-	-	-	-	0.032458
metab_982	-	-	-	3.7205	3.8546	3.8057	3.4198	4.1192	3.9523	3.8675	3.8839	3.8702	4.0251	3.8525	4.4847	4.4035	4.3399	4.3019	4.0319	4.0273	4.228	4.3321	4.0479	3.9736	3.9216	4.349	4.3234	4.1005	4.1009	4.0708	4.0937	pos_985	metab_982	239.085	1.6195	pos	-	-	-	-	-	0.0322113
metab_983	-	-	-	4.8766	4.872	4.7972	4.6141	4.8123	4.7043	4.8884	4.7119	4.9067	4.8936	4.8295	5.1618	5.1201	5.1132	5.0886	5.1156	5.1671	5.0864	5.0911	5.1017	5.1443	5.1053	5.1039	5.0862	4.9613	4.9825	4.9819	4.9838	pos_986	metab_983	249.123	1.6195	pos	-	-	-	-	-	0.0245193
metab_984	-	-	-	4.9858	4.7841	4.9963	4.1563	4.6039	4.6027	4.6813	4.6082	4.782	4.6423	4.7173	4.882	4.9838	4.8814	4.8436	4.8309	4.9407	4.915	4.9357	4.9099	5.0058	4.9095	4.8747	5.1097	4.7974	4.7964	4.8029	4.8056	pos_987	metab_984	219.149	1.6	pos	-	-	-	-	-	0.0101719
metab_985	-	-	-	4.7218	4.7077	4.6857	4.3439	4.6101	4.4209	4.6001	4.5565	4.6442	4.6442	4.612	4.8869	5.0182	4.8961	4.8664	4.9014	5.0289	4.9684	4.9067	4.9326	5.1173	4.9617	4.9486	4.8799	4.7761	4.7764	4.7814	4.8027	pos_988	metab_985	221.165	1.6	pos	-	-	-	-	-	0.0293804
metab_986	-	-	-	5.2874	5.2213	5.5678	4.7746	4.8612	4.8373	4.7475	4.9585	5.0183	4.988	4.9251	4.8146	4.7089	4.6304	4.7014	4.7493	4.8544	4.89	4.8239	4.834	5.056	4.9701	4.833	4.9879	4.9877	4.9975	4.9952	4.999	pos_989	metab_986	309.181	1.6195	pos	-	-	-	-	-	0.0114507
metab_987	-	-	-	4.4693	4.4572	4.3218	4.063	4.5534	4.404	4.4222	4.4225	4.531	4.5987	4.4407	4.7809	4.7822	4.7337	4.7156	4.7505	4.929	4.8015	4.731	4.7258	4.9511	4.7918	4.7309	4.787	4.6289	4.6385	4.6381	4.6371	pos_990	metab_987	329.152	1.6195	pos	-	-	-	-	-	0.0103561
metab_988	-	-	-	5.7169	5.6831	5.6081	5.5119	5.5783	5.3295	5.3308	5.5239	5.4299	5.5079	5.3958	4.7941	5.0374	5.0175	5.0928	4.7957	4.9099	4.9232	4.7037	4.8707	4.9074	4.8309	4.7444	4.7593	5.2764	5.285	5.276	5.2778	pos_991	metab_988	345.131	1.6195	pos	-	-	-	-	-	0.0097742
metab_989	-	-	-	4.6938	4.7556	4.783	4.3925	4.6129	4.4947	4.5281	4.6068	4.7353	4.7013	4.6234	4.8147	4.8633	4.7475	4.6973	4.8457	4.8574	4.8721	4.7346	4.8568	4.9294	4.9305	4.855	4.899	4.6956	4.696	4.7099	4.706	pos_992	metab_989	392.218	1.6195	pos	-	-	-	-	-	0.0165904
metab_990	-	-	-	5.3119	5.2908	5.1941	4.8963	5.3327	5.2391	5.2068	5.2807	5.2755	5.2908	5.3201	5.8927	5.8545	5.8547	5.9135	5.8868	5.8234	5.8081	5.8464	5.795	5.8039	5.7948	5.9281	5.8144	5.6111	5.6094	5.6164	5.6182	pos_993	metab_990	134.097	1.6403	pos	-	-	-	-	-	0.00965018
metab_991	-	-	-	4.6822	4.66	4.6294	4.3652	4.7539	4.6593	4.7396	4.6819	4.7935	4.7132	4.702	5.301	5.2405	5.268	5.2998	5.3002	5.1945	5.2014	5.2619	5.2399	5.23	5.2077	5.3348	5.2203	5.0277	5.0192	5.0321	5.0342	pos_994	metab_991	146.097	1.6403	pos	-	-	-	-	-	0.0152745
metab_992	-	-	-	5.6048	5.5846	5.4843	5.1916	5.5614	5.5181	5.444	5.5133	5.5749	5.6114	5.5073	6.0154	5.9658	5.9989	6.067	6.0411	5.97	5.9919	5.9565	5.9596	5.9744	5.9173	6.0423	5.9617	5.783	5.7814	5.7865	5.7829	pos_995	metab_992	255.134	1.6403	pos	-	-	-	-	-	0.00490989
metab_993	-	-	-	4.1063	4.2119	4.1026	3.7904	4.3062	4.119	4.1572	4.0661	4.363	3.9545	4.1609	4.2351	4.333	4.2131	4.2117	4.2314	4.2327	4.213	4.3425	4.2162	4.3438	4.3162	4.283	4.2713	4.1509	4.1545	4.1694	4.1624	pos_996	metab_993	268.166	1.6403	pos	-	-	-	-	-	0.0190879
metab_994	-	-	-	4.6578	4.6303	4.4395	4.3019	4.5125	4.4101	4.4169	4.4066	4.5012	4.48	4.3588	4.4296	4.3914	4.395	4.234	4.4521	4.4308	4.4725	4.3617	4.4597	4.6231	4.4708	4.4452	4.3976	4.424	4.3887	4.4239	4.4197	pos_997	metab_994	264.159	1.6403	pos	-	-	-	-	-	0.0384817
metab_995	-	-	-	4.1179	4.0575	3.808	3.6889	3.8716	3.4947	3.6396	3.5612	3.9019	3.6448	3.5035	3.9752	3.9375	4.0786	3.9188	4.0161	3.9879	3.8729	3.9559	3.8081	3.9522	4.0221	4.0707	3.9309	3.8663	3.8101	3.8545	3.9175	pos_998	metab_995	286.108	1.6403	pos	-	-	-	-	-	0.10224
metab_996	-	-	-	5.1711	5.012	4.9833	4.7526	4.9824	4.9346	4.9313	4.9763	5.0455	5.0765	5.0235	5.6022	5.5618	5.5719	5.5788	5.5851	5.5737	5.5201	5.5437	5.5061	5.5686	5.5324	5.5728	5.6044	5.3311	5.3304	5.3349	5.3367	pos_999	metab_996	320.161	1.6403	pos	-	-	-	-	-	0.00694153
metab_997	-	-	-	4.9269	4.8974	4.7924	4.921	4.8758	4.8687	4.912	4.9156	4.8409	5.0537	4.7814	5.3146	5.3395	5.2875	5.3042	5.3114	5.3055	5.3285	5.2939	5.3047	5.3294	5.2724	5.2933	5.3034	5.1223	5.1226	5.1119	5.1219	pos_1000	metab_997	366.166	1.6403	pos	-	-	-	-	-	0.011819
metab_998	-	-	-	3.9152	4.2266	4.0505	3.7434	3.9516	3.7454	3.8723	4.1808	3.7565	4.0762	3.983	4.1799	4.2321	4.1706	4.0369	4.2053	4.2247	4.0758	4.2578	4.345	4.2777	4.2028	4.1432	4.1449	3.9114	4.0045	3.9817	4.0089	pos_1001	metab_998	431.217	1.6403	pos	-	-	-	-	-	0.0994557
metab_999	-	-	-	5.4819	5.3751	5.384	4.9675	5.3044	5.2091	5.192	5.2948	5.2838	5.3945	5.2898	5.3599	5.405	5.3142	5.3106	5.3603	5.4226	5.3768	5.3563	5.3532	5.4287	5.3969	5.4139	5.4361	5.3021	5.3222	5.3218	5.3174	pos_1002	metab_999	362.207	1.6403	pos	-	-	-	-	-	0.0215257
metab_1000	-	-	-	4.2743	4.0811	4.11	4.3304	4.58	4.9959	4.5969	4.654	4.3698	4.4549	4.3322	4.3642	4.217	4.2588	4.5279	4.1761	4.3535	4.5441	4.7109	4.4613	4.2385	4.4155	4.4191	4.5158	4.4436	4.4262	4.4388	4.446	pos_1003	metab_1000	140.034	1.6596	pos	-	-	-	-	-	0.0202122
metab_1001	-	-	-	4.2204	4.181	4.0977	3.8012	4.2494	4.1482	4.154	4.2007	4.1706	4.1745	4.2484	4.8754	4.8313	4.8082	4.8974	4.8611	4.7832	4.7938	4.8228	4.7715	4.7881	4.7895	4.9017	4.7851	4.5765	4.5686	4.5993	4.5705	pos_1004	metab_1001	135.1	1.6596	pos	-	-	-	-	-	0.0329725
metab_1002	-	-	-	5.0363	5.0743	5.0589	4.65	4.9164	4.8155	4.8159	4.9334	4.8709	5.024	4.9097	4.8707	4.9205	4.8779	4.9079	4.8977	4.8815	4.9905	4.8488	4.888	5.023	5.0015	4.9604	4.9872	4.8998	4.8996	4.9	4.8777	pos_1005	metab_1002	351.228	1.6403	pos	-	-	-	-	-	0.0251907
metab_1003	-	-	-	4.8715	4.5993	4.7	4.5068	4.7118	4.654	4.6134	4.6926	4.7508	4.8327	4.7649	5.1154	4.9716	4.9432	4.8148	5.0336	5.0277	4.9729	5.012	4.9243	5.0351	4.9626	5.0503	4.9258	4.8192	4.8194	4.8191	4.8381	pos_1006	metab_1003	314.15	1.6403	pos	-	-	-	-	-	0.021878
metab_1004	-	-	-	3.5349	4.4893	4.1941	4.1462	4.1344	4.343	3.5773	3.822	4.4415	3.9051	4.3398	4.4484	4.2118	4.3379	4.2537	4.083	4.3088	4.2153	4.4013	4.2906	4.3134	4.2716	4.3222	4.0859	4.2476	4.2174	4.2502	4.2466	pos_1007	metab_1004	305.077	1.6596	pos	-	-	-	-	-	0.0348843
metab_1005	-	-	-	4.5323	4.5491	4.4637	4.2652	4.4658	4.4994	4.4822	4.4402	4.6406	4.6569	4.3727	4.6188	4.8344	4.8152	4.6804	4.7803	4.8296	4.7828	4.7356	4.7362	4.8373	4.7661	4.7625	4.7693	4.5333	4.5877	4.5826	4.5896	pos_1008	metab_1005	374.171	1.6596	pos	-	-	-	-	-	0.0599114
metab_1006	-	-	-	4.7004	4.561	4.5299	3.962	4.3523	4.2881	4.2627	4.3713	4.0786	4.4316	4.4489	4.5085	4.627	4.6097	4.5327	4.5339	4.5099	4.1784	4.1669	4.2249	4.1939	4.1158	4.3012	4.2195	4.3704	4.3626	4.352	4.4035	pos_1009	metab_1006	466.231	1.6596	pos	-	-	-	-	-	0.0520821
metab_1007	-	-	-	4.4068	4.6426	4.5102	3.7278	4.3855	4.2611	3.8785	4.326	3.9512	4.4027	4.362	3.9413	4.2507	4.0326	4.1931	4.3298	4.2217	4.3129	3.9477	4.2516	4.2909	4.2839	3.9543	4.1121	4.3628	4.3402	4.3917	4.3565	pos_1010	metab_1007	420.261	1.6596	pos	-	-	-	-	-	0.0500186
metab_1008	-	-	-	4.2014	3.811	4.2585	3.3043	3.734	3.5124	3.9909	3.5945	4.0102	3.5531	3.6493	4.3332	4.4084	4.4713	4.3344	4.2834	4.2909	4.2715	4.4027	4.4065	4.4941	4.437	4.4041	4.3268	3.9551	3.9359	3.9631	3.965	pos_1011	metab_1008	239.175	1.6812	pos	-	-	-	-	-	0.03026
metab_1009	-	-	-	3.79	3.7712	3.5726	3.3979	4.4492	4.3794	4.4327	4.3891	4.5261	4.577	4.4619	4.1463	4.128	4.3403	4.2094	4.253	4.3853	4.2679	4.1958	4.1621	3.6196	3.6981	4.3331	4.3397	4.2205	4.2204	4.2202	4.2454	pos_1012	metab_1009	293.161	1.6812	pos	-	-	-	-	-	0.0292821
metab_1010	-	-	-	4.0344	3.7477	3.8467	3.6876	3.9967	3.4027	3.8064	3.8092	3.7103	3.9529	3.4102	3.3363	4.0145	3.6937	3.8744	3.7471	3.7985	3.9519	3.847	3.6487	4.0181	3.7848	3.6736	4.0158	3.7659	3.7304	3.8737	3.7337	pos_1013	metab_1010	314.114	1.6812	pos	-	-	-	-	-	0.164233
metab_1011	-	-	-	4.3102	4.2571	4.2611	4.251	4.3224	4.1267	4.3821	4.2563	4.3891	4.4098	4.3201	4.4589	4.6688	4.5484	4.4942	4.5536	4.4818	4.6397	4.4285	4.5297	4.5861	4.4922	4.5198	4.423	4.3686	4.3655	4.3858	4.3672	pos_1014	metab_1011	357.193	1.6812	pos	-	-	-	-	-	0.0219076
Aloesol 7-glucoside	-	HMDB0040565	C19H24O9	4.7185	4.5473	4.5496	4.6934	4.2773	4.257	4.3078	4.3158	4.4163	4.5732	4.4736	4.257	4.3009	4.3276	4.1471	4.0447	4.3224	4.3805	4.4052	4.374	4.4396	4.4714	4.458	4.4418	4.4209	4.4013	4.4013	4.4115	pos_1015	metab_1012	379.136	1.6812	pos	M+H-H2O, M+NH4	-	87.5	-5.89582	94356-36-2	0.021843
metab_1013	-	-	-	5.1619	5.1574	5.2654	4.6764	4.9415	4.9032	4.85	4.8655	4.9926	5.1027	4.9163	4.9375	4.9439	4.9155	4.8732	4.8835	4.9667	4.945	4.9639	4.9512	5.0792	4.9998	4.9456	4.9856	4.9668	4.9672	4.9906	4.9738	pos_1016	metab_1013	350.207	1.6812	pos	-	-	-	-	-	0.0259275
metab_1014	-	-	-	4.6151	4.7001	4.5217	4.3702	4.6497	4.5872	4.6795	4.6299	4.7956	4.7005	4.5633	4.7593	4.7322	4.7416	4.7169	4.6994	4.7514	4.6466	4.6688	4.6431	4.6624	4.6041	4.6501	4.5926	4.6591	4.6499	4.6654	4.618	pos_1017	metab_1014	349.14	1.6812	pos	-	-	-	-	-	0.0475898
metab_1015	-	-	-	3.8208	3.5778	3.421	3.1464	3.8089	3.6465	3.8078	3.9286	3.6377	4.0263	3.77	4.1121	3.7153	4.0616	4.1702	3.9565	3.9101	3.8137	4.0805	3.8026	4.1372	3.987	4.0745	3.8662	3.9112	3.8881	3.977	3.8437	pos_1018	metab_1015	278.102	1.6812	pos	-	-	-	-	-	0.130037
metab_1016	-	-	-	3.7843	3.5003	3.4794	3.7795	3.8916	3.6904	3.6975	3.7646	3.72	4.0296	3.8266	3.6439	3.6875	3.9964	3.723	3.5343	3.897	3.8524	3.8413	3.7492	3.8699	3.9461	3.8462	3.7032	3.7853	3.7856	3.7817	3.7723	pos_1019	metab_1016	260.067	1.6812	pos	-	-	-	-	-	0.0141862
metab_1017	-	-	-	3.5717	3.6325	3.6563	3.5227	3.4016	3.3368	3.3957	3.5149	2.977	3.5306	3.4398	3.5416	3.6968	3.5643	3.4679	3.5479	3.5803	3.3678	3.6322	3.3594	3.1078	3.5437	3.4536	3.3539	3.4654	3.4023	3.4057	3.4034	pos_1020	metab_1017	227.066	1.7029	pos	-	-	-	-	-	0.0735209
metab_1018	-	-	-	4.0203	4.1027	3.8837	3.2473	3.8218	3.44	3.7599	3.7537	3.954	3.6323	3.7925	3.4188	3.8224	3.4077	3.5849	3.5505	3.756	3.8158	3.6782	3.6363	4.082	3.8559	3.7569	3.7915	3.7274	3.7277	3.7482	3.7291	pos_1021	metab_1018	237.196	1.7029	pos	-	-	-	-	-	0.023584
(S)-Argpyrimidine	-	HMDB0037180	C11H18N4O3	4.5249	4.5117	4.3518	4.1576	4.3923	4.0188	4.0745	4.1945	4.2538	4.2059	4.1535	3.5784	3.6636	3.7226	3.9855	3.5902	3.1113	3.645	3.5117	3.294	3.5363	3.6053	3.207	3.7425	4.071	4.0709	4.1103	4.083	pos_1022	metab_1019	277.13	1.7029	pos	M+H, M+Na	-	78.6	0.193325	-	0.04339
metab_1020	-	-	-	4.3835	4.4195	4.2668	3.9529	4.4115	4.2297	4.2949	4.3474	4.3365	4.3663	4.3745	4.4876	4.5544	4.4199	4.535	4.452	4.5821	4.4322	4.5848	4.4671	4.5517	4.5245	4.4963	4.5353	4.4086	4.409	4.4088	4.3876	pos_1023	metab_1020	254.15	1.7029	pos	-	-	-	-	-	0.0240976
metab_1021	-	-	-	3.6155	3.8903	3.8642	3.4478	4.7938	4.3792	4.609	4.726	4.7203	4.4283	4.4329	4.6747	4.8801	4.9319	4.914	4.9285	4.6684	4.476	4.5015	4.5704	4.5591	4.6477	4.4258	4.5009	4.5178	4.4888	4.5176	4.4083	pos_1024	metab_1021	427.208	1.7029	pos	-	-	-	-	-	0.113283
metab_1022	-	-	-	3.6469	4.1106	3.7738	2.9904	3.6775	3.9681	4.0059	3.969	3.9205	4.2041	4.1433	4.5905	4.518	4.5971	4.4457	4.4128	4.5068	4.3861	4.3789	4.3704	4.5138	4.429	4.0714	4.3046	4.1214	4.1119	4.089	4.0668	pos_1025	metab_1022	419.179	1.7029	pos	-	-	-	-	-	0.0558694
metab_1023	-	-	-	4.6116	4.5673	4.4622	4.3358	4.6646	4.4899	4.5447	4.5316	4.6496	4.6805	4.5908	4.8897	5.0701	5.0335	5.0921	4.8055	4.8115	4.8272	4.7723	4.7375	4.8565	4.7816	4.7687	4.8298	4.7421	4.7504	4.7474	4.7527	pos_1026	metab_1023	192.066	1.7249	pos	-	-	-	-	-	0.0105169
metab_1024	-	-	-	5.4774	5.5126	5.4187	4.2518	5.4048	5.2962	5.3374	5.3723	5.4284	5.4849	5.4439	5.2133	5.3922	5.3765	5.4445	5.4948	5.296	5.5361	5.5783	5.4863	5.6382	5.556	5.4849	5.5731	5.4186	5.4189	5.4184	5.4026	pos_1027	metab_1024	386.204	1.7029	pos	-	-	-	-	-	0.0182893
metab_1025	-	-	-	4.302	4.4234	4.1872	4.5277	4.2221	4.2222	4.2106	4.2877	4.3519	4.2619	4.355	3.8175	4.2485	4.104	4.1543	4.1659	3.9372	4.21	4.2359	3.996	4.5306	4.4026	4.0902	4.2794	4.1761	4.2038	4.1865	4.1776	pos_1028	metab_1025	360.224	1.7249	pos	-	-	-	-	-	0.0295421
metab_1026	-	-	-	3.9091	3.8517	3.6998	3.0061	3.9644	3.7023	3.9045	3.8431	3.9615	3.8659	4.0509	4.2195	4.3996	4.382	3.9559	4.3589	4.3257	4.1816	4.1099	4.1891	4.3531	4.3141	4.3129	4.1446	4.0534	4.071	4.1145	4.0544	pos_1029	metab_1026	426.169	1.7249	pos	-	-	-	-	-	0.0675249
metab_1027	-	-	-	3.7738	3.9114	3.6661	3.6716	3.8411	3.6877	3.8362	3.8122	3.9301	4.103	3.9486	3.9223	3.9771	3.7916	4.0454	3.8992	3.9143	4.128	3.7955	3.9119	4.194	3.9125	4.06	3.9506	3.9344	3.9209	3.9349	3.8739	pos_1030	metab_1027	487.252	1.7249	pos	-	-	-	-	-	0.0644416
(S)-Nerolidol 3-O-[a-L-rhamnopyranosyl-(1->2)-b-D-glucopyranoside]	-	HMDB0040844	C27H46O10	5.2091	5.213	5.3428	5.353	5.2861	5.1647	4.8518	5.1735	5.1648	5.447	5.4641	4.1998	3.6762	3.6437	4.001	3.3416	5.0102	3.3395	3.5053	3.5718	3.6944	4.1169	3.3629	3.3561	4.9549	4.9514	4.9549	4.8329	pos_1031	metab_1028	553.303	1.7249	pos	M+H-2H2O, M+Na	-	67	3.12329	130466-30-7	0.129302
metab_1029	-	-	-	3.5502	1.567	3.7328	1.4331	3.8224	3.8106	3.9542	3.6237	3.8765	3.937	4.0886	3.747	4.123	3.7524	4.197	4.3557	3.8698	4.3301	3.3362	3.7534	3.9818	3.7427	3.8373	3.8531	3.6721	3.6332	3.3654	3.6712	pos_1032	metab_1029	407.145	1.7249	pos	-	-	-	-	-	0.284197
metab_1030	-	-	-	4.884	4.4791	4.3125	4.1459	3.8277	3.8482	3.9307	4.0286	4.1397	4.1501	4.0597	3.9394	3.8345	3.8551	3.9259	3.8627	4.1831	3.961	4.11	3.8224	3.8693	3.8626	3.7746	3.9141	4.0929	4.1132	4.1078	4.1144	pos_1033	metab_1030	158.118	1.7462	pos	-	-	-	-	-	0.0225869
metab_1031	-	-	-	3.835	3.8139	3.7558	3.7755	4.0356	3.8789	4.1923	4.1014	4.0307	4.0433	3.983	4.1163	4.1077	4.0531	4.1494	3.9795	3.9499	4.3014	4.0322	4.376	3.8811	3.7369	4.2544	4.4335	4.0662	4.0105	4.0787	4.106	pos_1034	metab_1031	158.06	1.7462	pos	-	-	-	-	-	0.0903474
metab_1032	-	-	-	2.842	2.9144	2.7463	2.5141	2.6998	2.8493	2.9395	2.7285	3.0761	2.7705	2.6603	5.0991	5.03	3.4408	3.7406	4.95	4.8869	3.9914	4.3602	4.2264	4.0257	4.0481	3.8809	4.287	4.2093	4.2054	4.2051	4.2393	pos_1035	metab_1032	238.094	1.7462	pos	-	-	-	-	-	0.0385905
metab_1033	-	-	-	5.2715	5.2643	5.0775	4.9962	5.252	5.1528	5.1756	5.1407	5.2431	5.2891	5.2311	5.2143	5.2406	5.1276	5.2328	5.1766	5.21	5.1317	5.1323	5.0965	5.1758	5.1215	5.1848	5.1492	5.1877	5.1572	5.1818	5.1798	pos_1036	metab_1033	281.15	1.7462	pos	-	-	-	-	-	0.0304643
metab_1034	-	-	-	3.6642	3.6152	4.052	3.0921	3.7076	3.8264	3.4829	3.5142	3.8689	3.6465	4.2395	4.1437	4.0631	4.1703	4.2615	3.7909	3.9326	3.4161	4.0057	3.7252	3.8046	4.1725	3.8668	3.1778	3.8941	3.8589	3.7712	3.8932	pos_1037	metab_1034	351.166	1.7462	pos	-	-	-	-	-	0.126049
metab_1035	-	-	-	5.1551	5.1496	5.0844	4.8806	5.1898	5.1037	5.1443	5.226	5.306	5.1742	5.2538	5.3845	5.4223	5.3832	5.3982	5.3908	5.3596	5.5553	5.3841	5.629	5.3104	5.2283	5.5403	5.6691	5.3275	5.3277	5.3344	5.3316	pos_1038	metab_1035	265.155	1.7462	pos	-	-	-	-	-	0.00771894
metab_1036	-	-	-	5.2367	5.2391	5.0744	5.2096	5.2511	5.1296	5.4442	5.2085	5.2806	5.2139	5.2939	4.993	4.8913	4.9035	4.9689	5.239	5.1341	5.1707	5.2236	5.3633	5.1329	5.3174	5.2523	5.3717	5.2121	5.2101	5.2206	5.2201	pos_1039	metab_1036	132.081	1.7652	pos	-	-	-	-	-	0.0124146
metab_1037	-	-	-	6.2444	6.2612	6.0695	6.2329	6.2562	6.1414	6.4702	6.2332	6.2817	6.218	6.3111	5.9868	5.9014	5.8871	5.9836	6.2641	6.1324	6.2065	6.255	6.3876	6.1542	6.3482	6.2777	6.3918	6.2237	6.2287	6.2236	6.2357	pos_1040	metab_1037	146.06	1.7652	pos	-	-	-	-	-	0.0132609
metab_1038	-	-	-	3.0599	2.9667	3.5124	2.8285	3.4291	2.9421	3.4393	3.7895	3.3281	3.6255	3.8376	4.1666	4.3755	4.0973	4.216	4.3036	4.104	4.0384	4.3735	3.8786	4.2717	3.7655	3.9473	4.3874	3.7955	3.7306	3.6083	3.018	pos_1041	metab_1038	367.169	1.7652	pos	-	-	-	-	-	0.544825
metab_1039	-	-	-	4.7994	4.8026	4.6834	4.7481	4.8926	4.8523	4.9799	4.843	4.9154	4.9202	4.928	4.6774	4.5853	4.5456	4.6231	4.7275	4.7075	4.6753	4.7919	4.8444	4.6858	4.7964	4.7779	4.8983	4.7806	4.7848	4.7805	4.8028	pos_1042	metab_1039	130.065	1.7652	pos	-	-	-	-	-	0.0247266
metab_1040	-	-	-	4.8289	4.6852	4.7376	4.8584	4.8231	4.7282	4.7778	4.7093	4.9194	4.869	4.8935	4.9405	4.8844	4.9173	4.893	4.8483	4.8732	4.9003	4.8863	4.848	4.8703	4.9426	4.905	4.8977	4.8457	4.8347	4.8414	4.8473	pos_1043	metab_1040	137.015	1.7854	pos	-	-	-	-	-	0.0129486
metab_1041	-	-	-	4.724	4.9379	4.6754	4.4426	4.6528	4.4349	4.3148	4.7262	4.6019	4.7113	4.5905	3.9716	4.0676	4.0198	4.0834	4.0319	4.0225	4.0848	3.9942	4.1617	4.2268	4.2996	4.1997	4.3265	4.4521	4.4321	4.4599	4.4619	pos_1044	metab_1041	154.123	1.7854	pos	-	-	-	-	-	0.0309818
metab_1042	-	-	-	5.1883	5.2155	5.0846	4.8798	5.144	4.9988	5.0234	5.0467	5.1637	5.1401	5.0589	4.9985	5.0375	5.0029	5.015	4.9356	5.0035	4.9257	4.9391	4.923	5.0194	4.942	4.9646	4.9571	5.0129	5.0121	5.0176	5.0195	pos_1045	metab_1042	234.124	1.7462	pos	-	-	-	-	-	0.00826358
metab_1043	-	-	-	4.2994	4.2684	4.1174	4.0941	4.5223	4.3771	4.6483	4.4161	4.6129	4.529	4.5581	4.9261	4.9211	4.5276	4.6	4.8812	4.8937	4.7012	4.7425	4.7035	4.6567	4.5797	4.6682	4.6637	4.5659	4.5662	4.5692	4.571	pos_1046	metab_1043	233.113	1.7462	pos	-	-	-	-	-	0.00564413
metab_1044	-	-	-	4.7203	4.4872	4.4069	4.2538	4.5902	4.4435	4.5853	4.5388	4.6881	4.5222	4.4776	4.8443	4.9094	4.7119	4.7382	4.8892	4.8358	4.8689	4.8782	4.7674	4.841	4.7685	4.8189	4.787	4.6441	4.6295	4.6435	4.5931	pos_1047	metab_1044	371.192	1.7249	pos	-	-	-	-	-	0.0539077
metab_1045	-	-	-	5.1945	5.0464	5.0393	5.1747	5.1561	5.0918	5.1048	5.0742	5.2599	5.2263	5.2511	5.2883	5.2378	5.2866	5.2547	5.2013	5.2387	5.2461	5.2293	5.1892	5.1974	5.2763	5.2535	5.2252	5.1811	5.1827	5.1809	5.1924	pos_1048	metab_1045	157.042	1.8067	pos	-	-	-	-	-	0.0127267
metab_1046	-	-	-	5.0328	5.0413	4.9426	4.6117	4.9637	4.8177	4.9224	4.8541	5.0232	4.9385	4.9503	5.3649	5.4435	5.3386	5.3798	5.3631	5.4633	5.4003	5.3577	5.3443	5.4828	5.3878	5.3608	5.3654	5.2073	5.216	5.2156	5.2147	pos_1049	metab_1046	249.16	1.8067	pos	-	-	-	-	-	0.00942765
metab_1047	-	-	-	4.8083	4.7086	4.6195	4.5774	4.6559	4.3025	4.4048	4.5303	4.5055	4.6765	4.4757	4.5774	4.9308	4.842	4.9352	4.6284	4.64	4.8201	4.5407	4.4403	4.6548	4.615	4.6569	4.6306	4.6285	4.6199	4.6199	4.6605	pos_1050	metab_1047	260.103	1.8067	pos	-	-	-	-	-	0.0453136
metab_1048	-	-	-	4.7591	4.6617	4.6503	4.7945	4.7621	4.7522	4.6921	4.6801	4.8942	4.8025	4.8228	4.8621	4.8431	4.866	4.8124	4.7452	4.7736	4.7922	4.7897	4.7461	4.7249	4.806	4.8092	4.7643	4.7604	4.7402	4.7576	4.7631	pos_1051	metab_1048	202.044	1.8067	pos	-	-	-	-	-	0.023566
metab_1049	-	-	-	3.0732	3.2206	2.647	2.5267	2.3003	2.5318	2.9715	2.2075	2.3273	2.3268	3.0176	3.3933	3.5615	3.6458	3.6329	2.9035	3.5982	3.6702	3.4768	2.8114	3.5815	3.5339	3.3213	3.2704	3.2064	3.2349	3.143	3.2615	pos_1052	metab_1049	208.083	1.825	pos	-	-	-	-	-	0.113876
metab_1050	-	-	-	3.3175	4.3637	3.4239	3.0667	3.6446	3.9128	4.4488	4.1137	3.9203	4.2149	3.8529	3.7181	3.7116	3.6857	4.006	4.0529	3.9529	3.6536	3.5745	3.9998	3.5268	3.2477	3.8044	4.0443	3.8713	3.9123	3.8844	3.886	pos_1053	metab_1050	291.207	1.825	pos	-	-	-	-	-	0.0399794
metab_1051	-	-	-	4.1197	4.019	4.0728	3.5809	3.6087	3.1506	3.5557	3.3778	3.0967	3.6466	4.5941	3.053	3.6235	3.2694	3.1242	1.9178	3.2285	3.0495	3.4692	3.4477	3.7249	3.7531	2.778	1.9321	3.6768	3.6213	3.7447	3.6907	pos_1054	metab_1051	380.254	1.825	pos	-	-	-	-	-	0.116572
metab_1052	-	-	-	4.3321	4.2615	4.205	3.8858	3.9398	3.9051	3.9648	3.9043	3.2816	3.7371	4.1713	4.3551	4.4506	4.6008	4.5801	4.5592	4.1727	4.2896	3.8552	4.2971	4.3395	4.1379	4.3634	4.1845	4.2041	4.2045	4.1722	4.1964	pos_1055	metab_1052	509.276	1.825	pos	-	-	-	-	-	0.0344926
metab_1053	-	-	-	4.695	4.7043	4.5226	4.527	4.6247	4.5695	4.56	4.5809	4.705	4.7314	4.6695	4.5941	4.797	4.5886	4.691	4.7564	4.5665	4.7079	4.6125	4.7045	4.7078	4.6046	4.5915	4.6764	4.5907	4.6146	4.6087	4.6162	pos_1056	metab_1053	387.191	1.825	pos	-	-	-	-	-	0.0266287
metab_1054	-	-	-	4.2253	3.3801	3.9219	3.4788	4.1085	4.0073	3.965	3.7789	4.1159	3.9771	3.8447	4.2096	4.0825	4.0871	4.1025	3.9111	4.0771	3.8634	3.8018	3.7596	3.7055	3.8778	4.0572	3.9326	3.9637	3.954	3.9481	3.992	pos_1057	metab_1054	206.045	1.8457	pos	-	-	-	-	-	0.0455232
metab_1055	-	-	-	3.5047	3.3328	3.445	3.1901	3.3772	3.4616	3.4582	3.3253	3.5459	3.5031	3.3446	3.2091	3.3183	3.2304	3.0633	3.3474	3.2193	3.3025	2.787	2.5386	3.4291	2.9416	3.2027	3.1386	3.2974	3.3251	3.2891	3.2908	pos_1058	metab_1055	230.139	1.8457	pos	-	-	-	-	-	0.0391418
metab_1056	-	-	-	4.5758	4.8141	4.5517	4.39	4.6312	4.5835	4.9068	4.6913	4.9643	4.672	4.8272	4.6861	4.7587	4.5587	4.7256	4.7305	4.8716	4.6995	4.79	4.8782	4.7869	4.6796	4.6841	4.7975	4.7077	4.7103	4.7172	4.7292	pos_1059	metab_1056	185.129	1.8457	pos	-	-	-	-	-	0.0222128
metab_1057	-	-	-	4.1952	4.209	4.3439	4.2476	3.896	4.1095	4.1506	4.0026	4.3164	4.1662	3.9416	4.0752	4.0731	4.1448	4.067	4.0977	4.0634	4.2136	4.2804	4.1424	4.2639	4.1274	4.2044	4.3444	4.2221	4.2178	4.2336	4.2193	pos_1060	metab_1057	286.072	1.8457	pos	-	-	-	-	-	0.0166419
metab_1058	-	-	-	4.735	4.3563	4.8812	4.3793	4.6251	4.6997	4.5528	4.4532	4.8183	4.6097	4.562	4.5896	4.4261	4.4624	4.4729	4.5151	4.4684	4.5289	4.5209	4.6193	4.5576	4.4427	4.6923	4.656	4.5683	4.5685	4.5321	4.57	pos_1061	metab_1058	349.187	1.8457	pos	-	-	-	-	-	0.0415635
metab_1059	-	-	-	3.1488	3.5839	3.4674	3.2243	3.5967	3.5719	3.4848	3.3931	3.642	3.7967	3.9314	3.5849	3.667	3.5733	3.3983	3.5215	3.6128	3.7562	3.6638	3.9139	3.5806	3.8104	3.7992	4.0052	3.6399	3.6223	3.6518	3.6307	pos_1062	metab_1059	377.182	1.8457	pos	-	-	-	-	-	0.0291638
metab_1060	-	-	-	4.2988	4.3384	4.639	4.2252	4.3848	4.3413	4.3231	4.344	4.1772	4.4936	4.301	4.4423	4.3179	4.3645	4.3235	4.3644	4.265	4.4764	4.3955	4.3717	4.5545	4.3779	4.4666	4.46	4.4315	4.4094	4.4221	4.4247	pos_1063	metab_1060	360.192	1.8457	pos	-	-	-	-	-	0.021258
metab_1061	-	-	-	4.3775	4.4199	4.5005	3.8413	4.2372	4.2679	4.3575	4.403	4.3565	4.5132	4.3915	4.8891	4.8951	4.8593	4.9799	4.9528	4.9067	4.8411	4.8629	4.6883	4.895	4.7766	4.9361	4.8686	4.6062	4.681	4.606	4.6082	pos_1064	metab_1061	465.271	1.8457	pos	-	-	-	-	-	0.0890312
metab_1062	-	-	-	5.0201	5.0728	5.2363	4.6916	5.0937	5.0943	5.0378	5.0843	5.2902	5.0505	5.321	5.6424	5.6534	5.3383	5.4137	5.5676	5.4276	5.4285	5.3578	5.4562	5.4112	5.4721	5.5642	5.4814	5.3544	5.3478	5.3516	5.3577	pos_1065	metab_1062	362.207	1.825	pos	-	-	-	-	-	0.00967286
metab_1063	-	-	-	4.1438	4.3145	4.025	3.9068	4.0095	3.9946	4.2646	4.159	4.2595	4.1819	4.2326	4.2624	4.156	4.1637	4.2776	4.1957	4.2595	4.0887	4.2729	4.372	4.3531	4.2489	4.1588	4.3548	4.1764	4.2129	4.2021	4.2146	pos_1066	metab_1063	157.134	1.8672	pos	-	-	-	-	-	0.0399401
Alanyl-Hydroxyproline	-	HMDB0028688	C8H14N2O4	4.9372	4.9245	4.7997	4.585	4.9399	4.8822	5.0939	4.8304	5.1048	5.0674	4.9393	5.0629	5.041	5.001	5.0671	5.0335	5.0734	4.9885	5.1202	5.0203	5.0202	5.0069	5.0642	5.059	4.9774	4.9819	4.9774	4.996	pos_1067	metab_1064	185.092	1.8672	pos	M+H-H2O, M+K	-	55.9	1.00841	-	0.0204785
metab_1065	-	-	-	3.9902	3.8981	3.6423	4.0712	3.8592	3.7862	3.9489	3.9491	3.891	4.0702	3.692	4.318	4.2454	4.1538	4.4082	4.3482	4.4569	4.4291	4.4192	4.5315	4.1905	4.3439	4.0388	4.6428	4.1394	4.1736	4.1927	4.1948	pos_1068	metab_1065	205.09	1.8672	pos	-	-	-	-	-	0.0578904
metab_1066	-	-	-	4.0703	4.101	3.9209	3.6979	3.9225	3.7485	4.1254	3.8087	3.9897	4.0028	3.7992	3.9457	3.9419	4.0096	3.9671	3.9763	4.1064	3.8167	3.9029	3.9093	4.0796	3.9511	3.9713	4.0161	4.0063	4.0348	4.0061	4.0079	pos_1069	metab_1066	255.17	1.8672	pos	-	-	-	-	-	0.0328839
metab_1067	-	-	-	4.203	4.2031	4.2009	4.1312	4.1025	4.261	4.4434	4.0813	4.5358	4.3488	4.2122	3.912	3.7828	3.9714	3.6946	3.8407	4.0249	3.6655	3.8932	4.1894	3.8897	3.5737	4.0544	4.1621	4.1619	4.1616	4.1431	4.1558	pos_1070	metab_1067	290.139	1.8672	pos	-	-	-	-	-	0.0200936
metab_1068	-	-	-	4.3412	4.2356	4.0927	3.8764	4.0808	3.95	4.3265	4.0441	4.1392	4.2644	4.2156	4.7662	4.4793	4.4514	4.4717	4.4651	4.6964	4.477	5.2908	4.7205	4.5699	4.5151	4.5569	4.9034	4.5026	4.5088	4.4986	4.5104	pos_1071	metab_1068	312.155	1.8672	pos	-	-	-	-	-	0.0126429
metab_1069	-	-	-	5.3438	5.371	5.3072	5.0692	5.1456	5.1352	5.1637	5.1083	5.1598	5.4031	5.2333	5.1353	5.0635	5.099	5.0303	5.1047	5.1867	5.123	5.1074	5.116	5.221	5.2008	5.1217	5.2265	5.1824	5.2176	5.2095	5.2189	pos_1072	metab_1069	370.197	1.8672	pos	-	-	-	-	-	0.0384179
metab_1070	-	-	-	4.9248	4.968	4.8633	4.6583	4.8078	4.706	4.6377	4.7606	4.7501	4.9203	4.7674	4.474	4.4729	4.3783	4.4699	4.5804	4.3631	4.678	4.6739	4.6028	4.726	4.6811	4.6028	4.6439	4.7021	4.7313	4.6906	4.6931	pos_1073	metab_1070	400.208	1.8672	pos	-	-	-	-	-	0.0438181
metab_1071	-	-	-	4.3406	4.5703	4.5092	4.3241	4.269	4.1676	4.2411	4.3172	3.9058	4.569	4.3847	4.2601	4.2135	4.276	4.12	4.2782	4.2287	4.3025	4.3111	4.281	4.3383	4.237	4.2942	4.2192	4.3742	4.3583	4.2592	4.3755	pos_1074	metab_1071	418.234	1.8672	pos	-	-	-	-	-	0.120255
metab_1072	-	-	-	2.9687	4.0983	3.5927	4.3234	3.4014	4.786	3.476	2.8302	4.8129	3.1371	4.8516	4.8209	3.5466	3.9269	3.7247	4.7238	4.7648	4.3552	4.6532	4.6917	4.7031	4.6299	4.7275	4.2402	4.4645	4.4634	4.465	4.4671	pos_1075	metab_1072	172.039	1.8889	pos	-	-	-	-	-	0.00364415
metab_1073	-	-	-	3.5629	3.3879	3.4121	3.5375	3.5872	3.3465	3.497	3.3656	3.3217	3.6852	3.4566	4.2252	4.2474	3.623	3.3723	4.182	3.8929	4.2557	4.235	4.276	4.4315	4.3103	4.2792	4.3294	3.9764	3.9766	3.9808	3.9914	pos_1076	metab_1073	224.078	1.8889	pos	-	-	-	-	-	0.0163553
metab_1074	-	-	-	4.3321	4.3385	4.2085	3.9293	4.2184	4.1038	4.3079	4.2827	4.3721	4.3191	4.293	4.3979	4.3412	4.2075	4.354	4.3244	4.3625	4.3086	4.281	4.2798	4.3949	4.3383	4.2835	4.3558	4.273	4.2644	4.2643	4.3106	pos_1077	metab_1074	252.171	1.8889	pos	-	-	-	-	-	0.0520385
metab_1075	-	-	-	5.1465	4.6143	5.067	4.3225	4.5469	4.5962	4.7216	4.4523	4.7014	4.6769	4.6457	4.9391	4.882	4.8925	4.9335	4.9953	4.9533	4.6867	4.7837	4.6911	4.7659	4.6537	4.6844	4.7519	4.7728	4.7742	4.778	4.7828	pos_1078	metab_1075	267.134	1.8889	pos	-	-	-	-	-	0.0103286
metab_1076	-	-	-	5.4222	5.3843	5.2908	4.9987	5.3436	5.2299	5.2368	5.2695	5.3337	5.3551	5.3186	5.5883	5.6325	5.5187	5.6116	5.6124	5.6252	5.6378	5.5946	5.5632	5.6928	5.6072	5.6114	5.6156	5.4651	5.4542	5.4605	5.4583	pos_1079	metab_1076	354.202	1.8889	pos	-	-	-	-	-	0.0104427
metab_1077	-	-	-	4.1107	4.1063	3.959	3.9783	3.9681	4.1885	4.0059	4.0916	4.1659	4.2112	4.3215	4.4249	4.263	4.1937	4.2604	4.3894	4.3684	4.3074	4.2998	4.3295	4.482	4.5116	4.2706	4.1797	4.2419	4.192	4.1905	4.1926	pos_1080	metab_1077	441.214	1.8889	pos	-	-	-	-	-	0.0594854
metab_1078	-	-	-	4.5499	4.7916	4.5797	4.4244	4.7466	4.6009	4.6578	4.5826	4.718	4.7799	4.757	4.7117	4.5575	4.5625	4.5587	4.5631	4.6441	4.544	4.6462	4.5515	4.6344	4.604	4.6376	4.5865	4.6297	4.63	4.637	4.6373	pos_1081	metab_1078	164.107	1.9111	pos	-	-	-	-	-	0.00973153
8-[(Aminomethyl)sulfanyl]-6-sulfanyloctanoic acid	-	HMDB0013639	C9H19NO2S2	4.3855	4.8869	4.1991	5.0369	4.5698	4.2877	5.0238	4.3577	4.6983	4.9506	4.6143	3.9712	3.9318	2.9165	3.5531	3.9726	3.9839	4.1051	4.2427	4.1097	4.1749	4.1588	3.9837	4.0942	4.4921	4.4875	4.4919	4.4764	pos_1082	metab_1079	260.074	1.9111	pos	M+H, M+Na	-	60	3.08592	-	0.0168514
metab_1080	-	-	-	4.7988	4.5917	4.6775	4.4806	4.5391	4.4846	5.1511	4.4625	4.7021	4.7762	4.5209	4.784	4.7833	4.7177	4.7606	4.6985	4.7364	4.7822	4.7306	4.764	4.7245	4.7003	4.7924	4.8021	4.7299	4.734	4.7352	4.7374	pos_1083	metab_1080	279.17	1.9111	pos	-	-	-	-	-	0.00724505
metab_1081	-	-	-	4.4038	4.0428	3.8869	3.886	4.0162	3.7584	3.2202	3.8887	4.2036	4.0964	3.9131	4.1067	4.3128	4.3161	4.2243	4.2002	3.418	3.7562	3.298	3.7471	3.4333	3.6314	3.6217	3.3447	3.9281	3.9283	3.8968	3.9297	pos_1084	metab_1081	323.092	1.9111	pos	-	-	-	-	-	0.0360929
metab_1082	-	-	-	4.4837	4.4521	4.1246	3.8625	4.4457	4.3176	4.4161	4.5357	4.4793	4.323	4.4914	4.4694	4.5204	4.6895	4.845	4.7761	4.4582	4.7594	4.8226	4.8962	4.784	4.741	4.7887	4.8596	4.5968	4.5942	4.5865	4.5926	pos_1085	metab_1082	409.219	1.9111	pos	-	-	-	-	-	0.0100041
metab_1083	-	-	-	3.3843	1.4567	3.2341	2.9905	3.0786	2.9073	1.4259	2.7122	3.3642	2.5156	2.7055	3.8718	3.6121	3.705	3.676	3.6866	3.7075	3.6525	3.4851	3.572	3.1264	3.527	3.5594	3.5221	3.3684	3.3713	3.1856	3.3649	pos_1086	metab_1083	133.05	1.9318	pos	-	-	-	-	-	0.187917
metab_1084	-	-	-	4.69	4.6761	4.5309	4.382	4.6018	4.4703	2.8407	4.5416	4.5643	4.7575	4.5409	3.9898	4.0882	4.0105	4.0351	4.0332	3.9554	4.1185	3.8939	3.792	4.0324	4.0047	4.0615	3.9069	4.3563	4.3742	4.3561	4.358	pos_1087	metab_1084	297.076	1.9111	pos	-	-	-	-	-	0.0203332
metab_1085	-	-	-	4.3137	4.4095	4.1767	3.9618	4.0793	4.1239	4.1881	4.1806	4.1494	4.073	3.93	4.7056	4.6517	4.7306	4.7626	4.7274	4.609	4.674	4.5554	4.6738	4.6955	4.5855	4.662	4.6829	4.4924	4.4926	4.4956	4.4975	pos_1088	metab_1085	217.134	1.9318	pos	-	-	-	-	-	0.00567428
metab_1086	-	-	-	4.201	4.129	4.019	4.0425	4.0101	3.9589	4.226	4.0024	4.0885	4.076	4.3633	4.1581	4.0616	3.8873	3.8953	4.1546	3.8941	4.3281	4.2043	4.3215	4.0719	4.4241	4.194	4.586	4.1364	4.1366	4.1754	4.1467	pos_1089	metab_1086	244.118	1.9318	pos	-	-	-	-	-	0.0430262
metab_1087	-	-	-	4.6252	4.6117	4.7599	4.5925	4.5761	4.5712	4.6008	4.5902	4.5862	4.7755	4.6049	5.143	5.1465	5.0533	5.0105	5.075	5.061	5.0606	4.9575	5.0177	5.0832	5.0256	5.0945	5.0416	4.8776	4.8729	4.8775	4.8781	pos_1090	metab_1087	344.197	1.9318	pos	-	-	-	-	-	0.00553565
metab_1088	-	-	-	3.9548	3.9805	3.5883	2.942	4.0486	4.559	4.2308	4.2091	3.8144	4.0069	4.5478	3.5764	3.6021	3.5675	3.7056	3.5541	3.8947	3.9365	3.7611	3.9584	3.8676	3.7636	3.1192	3.7525	3.9538	3.9651	4.0032	3.9131	pos_1091	metab_1088	378.219	1.9318	pos	-	-	-	-	-	0.0851519
metab_1089	-	-	-	4.5773	4.7596	4.7211	4.2213	4.6103	4.4427	4.5598	4.5713	4.5855	4.6133	4.5369	4.715	4.8181	4.7278	4.773	4.7933	4.8508	4.8115	4.7882	4.756	4.8121	4.8422	4.7354	4.8085	4.6678	4.6804	4.6677	4.6695	pos_1092	metab_1089	380.218	1.9318	pos	-	-	-	-	-	0.0141136
metab_1090	-	-	-	4.1635	4.1797	4.0327	3.8235	3.9366	3.8922	3.8643	3.9856	4.1071	4.2231	4.0889	4.5364	4.707	4.5639	4.501	4.5208	4.6711	4.5392	4.4994	4.5339	4.537	4.5435	4.5374	4.5015	4.3119	4.2985	4.3108	4.2343	pos_1093	metab_1090	464.24	1.9318	pos	-	-	-	-	-	0.0815543
metab_1091	-	-	-	4.1739	3.8476	3.8396	3.8207	4.1259	4.3592	4.1921	3.8986	4.0358	4.1892	4.2478	4.4135	4.3899	4.1901	4.3694	4.4582	4.5618	4.289	4.1653	4.3462	4.2592	4.115	3.9738	4.2836	4.2594	4.2592	4.1953	4.2465	pos_1094	metab_1091	360.156	1.9318	pos	-	-	-	-	-	0.067935
metab_1092	-	-	-	5.3357	5.1287	5.0467	5.0476	5.181	5.1978	5.196	5.1546	5.3189	5.3382	5.4086	5.4904	5.3143	5.3073	5.2139	5.3884	5.4891	5.4461	5.4757	5.4524	5.4861	5.447	5.4962	5.4259	5.3215	5.3334	5.3352	5.3369	pos_1095	metab_1092	211.108	1.9318	pos	-	-	-	-	-	0.0159645
metab_1093	-	-	-	3.4469	4.2429	3.5597	3.5992	2.82	2.7476	3.2977	3.4079	3.3294	3.2623	3.2455	3.7413	3.5535	3.8221	3.7905	3.7654	3.6239	3.8087	3.7927	3.6722	3.6108	3.714	3.7373	3.7348	3.6753	3.6754	3.6752	3.7422	pos_1096	metab_1093	204.138	1.9318	pos	-	-	-	-	-	0.0799226
metab_1094	-	-	-	3.8071	3.3651	3.4882	3.0387	3.4599	3.3138	3.4289	3.3065	3.609	3.6515	3.2813	4.6953	4.5956	4.6222	4.8069	4.6207	4.5063	4.5699	4.7906	4.6775	4.5856	4.7467	4.74	4.8024	4.3759	4.3762	4.3759	4.3865	pos_1097	metab_1094	262.155	1.9541	pos	-	-	-	-	-	0.0121784
metab_1095	-	-	-	3.9706	4.094	3.973	3.5671	3.8411	3.8521	4.1059	3.7501	4.1217	4.1002	3.9177	4.0998	4.1302	4.1907	4.1793	4.1624	4.2335	4.1936	4.1128	3.998	4.2368	4.2614	4.2133	4.1764	4.0165	4.0363	4.0164	4.0985	pos_1098	metab_1095	292.129	1.9541	pos	-	-	-	-	-	0.0927385
metab_1096	-	-	-	4.121	4.127	3.8954	3.8942	3.9645	3.8363	4.0335	3.8729	3.9438	4.1975	4.0409	4.2628	4.2223	4.2242	4.1119	4.1833	4.2669	4.2148	4.1184	4.1793	4.213	4.0171	4.2308	4.2443	4.1247	4.1456	4.1344	4.1332	pos_1099	metab_1096	313.12	1.9541	pos	-	-	-	-	-	0.019774
metab_1097	-	-	-	5.3162	5.2921	5.2413	4.9631	5.2037	5.0994	5.1159	5.1182	5.2367	5.3136	5.1819	5.4541	5.4464	5.3801	5.4037	5.4304	5.4768	5.4151	5.3716	5.3762	5.4558	5.3947	5.3938	5.411	5.3085	5.3166	5.3152	5.3181	pos_1100	metab_1097	368.218	1.9541	pos	-	-	-	-	-	0.00970653
metab_1098	-	-	-	3.6766	3.6368	3.8978	2.6138	3.4193	3.6562	3.5628	3.6871	3.8269	3.8093	3.6839	4.1051	4.4653	4.5491	4.5881	4.3659	4.2449	4.1587	3.9998	4.605	4.6597	4.3948	4.2341	4.5987	4.015	4.0952	4.074	4.0983	pos_1101	metab_1098	397.208	1.9541	pos	-	-	-	-	-	0.0857854
metab_1099	-	-	-	5.1258	4.6676	4.7547	4.6633	4.7217	4.4972	4.5581	4.9422	4.8074	4.7617	4.5438	5.1719	5.1031	4.9627	5.0603	5.0041	5.2392	5.2871	5.2299	4.9552	4.9855	5.1382	5.1116	5.1535	4.9714	4.9628	4.9755	4.9777	pos_1102	metab_1099	347.124	1.9541	pos	-	-	-	-	-	0.0150671
metab_1100	-	-	-	4.3656	4.3571	4.2585	4.0869	4.2906	4.2273	4.3168	4.2149	4.2981	4.393	4.2266	4.5717	4.5909	4.4828	4.6005	4.4983	4.5813	4.5587	4.3683	4.3568	4.553	4.3971	4.4562	4.4922	4.399	4.3992	4.4159	4.4008	pos_1103	metab_1100	329.115	1.9541	pos	-	-	-	-	-	0.0189853
metab_1101	-	-	-	3.8414	3.9543	3.7565	3.5574	3.8367	3.6805	3.721	3.7086	3.8251	3.8229	3.7898	4.3124	4.2535	4.2259	4.0065	4.1877	4.1671	4.2502	3.8132	3.9488	4.3219	4.197	4.4001	3.8254	3.887	3.9479	3.9477	3.9362	pos_1104	metab_1101	355.169	1.9763	pos	-	-	-	-	-	0.0646725
metab_1102	-	-	-	4.2582	4.5044	4.0428	3.6036	4.1452	3.9255	4.1184	4.163	4.2433	4.1355	4.1189	3.6018	4.0672	4.0358	4.0377	3.8769	3.9834	4.315	4.0767	4.0931	4.1702	3.8216	4.1336	4.1447	3.9971	4.0157	4.0616	3.9973	pos_1105	metab_1102	386.193	1.9763	pos	-	-	-	-	-	0.0718054
metab_1103	-	-	-	4.5007	4.5811	4.4376	4.3247	4.4562	4.3492	4.5191	4.3872	4.5365	4.6646	4.4256	4.4208	4.6102	4.4764	4.5125	4.5827	4.6238	4.6224	4.5614	4.5048	4.6812	4.602	4.4245	4.6356	4.5256	4.5284	4.5255	4.5382	pos_1106	metab_1103	384.213	1.9763	pos	-	-	-	-	-	0.0139693
metab_1104	-	-	-	4.9874	4.9877	4.9932	4.6091	5.0136	4.8157	4.9844	4.9234	5.1184	4.7778	5.0244	5.563	5.6906	5.5968	5.5733	5.57	5.6912	5.6221	5.5725	5.6468	5.7093	5.5854	5.6572	5.5833	5.4031	5.4034	5.4067	5.409	pos_1107	metab_1104	205.17	1.9984	pos	-	-	-	-	-	0.00650143
metab_1105	-	-	-	4.0922	4.5741	4.3516	3.9832	4.0216	3.9801	3.9996	4.2574	3.9701	4.003	3.7357	3.6034	3.4668	3.2316	3.4038	3.2792	3.0932	3.6757	3.3813	3.406	3.9934	3.593	3.5717	3.5314	3.9701	3.9721	3.9894	3.983	pos_1108	metab_1105	234.133	1.9984	pos	-	-	-	-	-	0.0210593
metab_1106	-	-	-	4.6173	4.6013	4.3837	4.1891	4.4391	4.3811	4.331	4.3872	4.7129	4.5102	4.4212	4.7611	4.8512	4.8403	4.8515	4.8411	4.9443	4.9176	4.8972	4.8792	4.9115	4.8826	4.9579	4.9497	4.706	4.7053	4.709	4.7109	pos_1109	metab_1106	299.141	1.9984	pos	-	-	-	-	-	0.00607327
metab_1107	-	-	-	4.1884	3.9828	3.9166	4.1131	3.8921	4.0533	3.777	3.8163	4.1208	4.044	4.132	4.3427	4.1307	4.1256	4.0267	4.129	4.3344	4.0958	4.0242	4.1543	4.3256	4.3592	4.211	4.3204	4.0386	4.0381	4.0904	4.0537	pos_1110	metab_1107	339.168	1.9984	pos	-	-	-	-	-	0.0578198
metab_1108	-	-	-	4.4469	4.5062	4.1661	4.2217	4.1675	4.1727	4.1804	4.2519	4.3804	4.7654	4.1729	4.181	4.0994	4.228	4.2561	4.2149	4.2853	4.2121	4.1632	4.2373	4.467	4.3517	4.2868	4.2696	4.3517	4.3378	4.3516	4.3534	pos_1111	metab_1108	365.244	1.9984	pos	-	-	-	-	-	0.0165462
metab_1109	-	-	-	4.2301	3.8705	3.6424	4.1164	4.2881	4.0878	4.2751	4.1579	4.2778	4.151	4.0791	4.864	4.889	4.8328	4.8554	4.9554	4.7157	4.9731	4.7458	4.84	4.9059	4.8804	4.888	4.8954	4.5965	4.5967	4.5964	4.5815	pos_1112	metab_1109	519.261	1.9984	pos	-	-	-	-	-	0.0171967
metab_1110	-	-	-	4.5162	4.4336	4.2357	4.4419	4.5086	4.4905	4.4464	4.5652	4.6839	4.4856	4.4834	5.156	4.7251	4.914	4.8533	4.7731	4.8592	4.8916	4.9039	4.8406	4.6657	4.7751	4.8178	4.9024	4.7017	4.7075	4.7093	4.7062	pos_1113	metab_1110	138.055	2.02	pos	-	-	-	-	-	0.00749736
metab_1111	-	-	-	4.2576	4.203	4.14	4.1319	4.2363	4.2488	4.2573	4.235	4.39	4.282	4.2224	4.431	4.4248	4.3487	4.4409	4.4242	4.5361	4.539	4.4709	4.5869	4.3302	4.4259	4.3467	4.5644	4.3422	4.334	4.3645	4.351	pos_1114	metab_1111	144.066	2.02	pos	-	-	-	-	-	0.0301438
metab_1112	-	-	-	3.8666	3.7087	4.0102	3.5665	4.5126	4.3284	4.6878	4.1175	4.6494	4.4623	4.3531	4.256	4.2477	4.554	4.2844	4.3453	4.4126	4.3322	4.4184	4.5762	4.3325	4.3225	4.3444	4.4749	4.2587	4.2663	4.2599	4.2604	pos_1115	metab_1112	227.118	2.02	pos	-	-	-	-	-	0.0078538
metab_1113	-	-	-	4.9182	4.985	5.0253	4.5511	4.7564	4.6625	4.6879	4.7877	4.7342	4.8706	4.7672	4.6234	4.5863	4.6501	4.1456	4.7992	4.3395	4.8656	4.8126	4.7822	4.936	4.8713	4.4854	4.8371	4.7757	4.7937	4.7711	4.773	pos_1116	metab_1113	357.213	1.9984	pos	-	-	-	-	-	0.0241365
metab_1114	-	-	-	4.9706	4.9059	5.5387	4.5554	4.5393	4.5271	4.4407	4.718	4.9541	4.6806	5.1374	5.0326	4.9606	5.0489	4.983	4.955	5.0148	5.1322	5.3537	5.635	5.2268	5.613	5.4964	5.9004	5.2135	5.1997	5.2133	5.212	pos_1117	metab_1114	321.192	2.02	pos	-	-	-	-	-	0.015169
metab_1115	-	-	-	3.6654	3.572	3.5676	3.4337	3.6199	3.5474	3.54	3.5267	3.647	3.6465	3.5803	3.8673	4.3597	4.2692	4.1908	4.4254	4.2573	4.311	4.0144	4.2518	4.1735	3.6486	4.1601	4.0687	3.8197	3.8409	3.838	3.6234	pos_1118	metab_1115	503.107	2.02	pos	-	-	-	-	-	0.213032
metab_1116	-	-	-	4.6458	4.3514	4.6717	3.8443	3.8072	3.7703	2.8002	3.9266	3.9778	4.1388	3.5456	2.7117	2.7103	2.7163	2.7214	2.7065	2.7208	2.9611	2.6743	2.7046	2.7286	2.7009	2.7278	2.721	3.6434	3.6941	3.586	3.6232	pos_1119	metab_1116	479.287	2.02	pos	-	-	-	-	-	0.104804
metab_1117	-	-	-	3.5673	3.7389	3.499	2.8429	3.8727	3.6459	3.5213	3.6669	4.009	3.6759	3.8938	4.2286	4.341	4.2959	4.3164	4.2441	4.2774	4.3662	4.2112	4.2223	4.1811	4.0981	4.3773	4.198	3.9877	3.9675	3.9966	3.9583	pos_1120	metab_1117	290.212	2.0416	pos	-	-	-	-	-	0.0406184
metab_1118	-	-	-	4.5277	4.5038	4.3659	4.3809	4.5288	4.4423	4.6965	4.3977	4.6474	4.5737	4.6088	4.8239	4.5592	4.6229	4.5642	4.7146	4.666	4.6555	4.7631	4.7121	4.5812	4.769	4.6751	4.8629	4.6003	4.6007	4.6068	4.6182	pos_1121	metab_1118	295.129	2.0416	pos	-	-	-	-	-	0.0193024
metab_1119	-	-	-	3.6644	0.1135	0.1125	3.4757	3.7837	4.6274	4.6467	3.3485	4.5501	3.5235	3.9793	5.0547	4.6157	4.443	4.5518	4.9498	5.0469	4.8684	4.91	4.9194	4.9862	4.7707	4.9372	4.7248	4.6323	4.6474	4.6251	4.6101	pos_1122	metab_1119	396.14	2.02	pos	-	-	-	-	-	0.0357085
metab_1120	-	-	-	5.592	5.6151	5.5255	5.2442	5.4373	5.3112	5.3766	5.4065	5.5439	5.4025	5.4811	5.0353	5.4193	5.3545	5.476	5.4971	5.182	5.6796	5.652	5.5932	5.6258	5.5742	5.5376	5.6442	5.4758	5.4823	5.4752	5.4797	pos_1123	metab_1120	386.204	2.0416	pos	-	-	-	-	-	0.00777215
Marmesin rhamnoside	-	HMDB0039564	C20H24O8	5.2349	5.146	5.2687	5.5631	5.0831	5.2675	4.9668	5.1311	5.2245	5.2011	5.116	4.7495	4.6251	4.5915	4.8113	4.8596	4.7712	4.9674	5.0437	5.0359	4.8477	4.8746	4.9272	4.9928	5.1046	5.0957	5.0937	5.0955	pos_1124	metab_1121	393.152	2.02	pos	M+H-H2O, M+H	-	62.9	-6.85267	142347-99-7	0.0112915
metab_1122	-	-	-	4.7654	4.6619	4.5212	4.4714	4.6887	4.6334	4.693	4.5467	4.7844	4.7441	4.6962	4.9315	4.8814	4.8378	4.8226	4.8409	4.8891	4.8346	4.9006	4.848	4.876	4.847	4.8634	4.9349	4.7617	4.7573	4.7655	4.7673	pos_1125	metab_1122	178.086	2.0637	pos	-	-	-	-	-	0.0102224
metab_1123	-	-	-	3.6592	3.4593	3.6017	3.532	3.6669	3.4708	3.5245	3.2763	3.6286	3.4989	3.3434	3.5914	3.4441	3.689	3.5944	3.508	3.677	3.4194	3.4719	3.4761	3.3941	3.2376	3.1619	3.2586	3.4526	3.5271	3.5242	3.5215	pos_1126	metab_1123	192.088	2.0637	pos	-	-	-	-	-	0.079286
metab_1124	-	-	-	4.5726	4.3954	4.2467	4.193	4.613	4.5265	4.5391	4.4966	4.748	4.6363	4.5908	4.8765	4.8323	4.8537	4.8746	4.765	4.7792	4.6817	4.6505	4.6453	4.7295	4.7562	4.8682	4.6974	4.6501	4.6478	4.6474	4.6711	pos_1127	metab_1124	303.134	1.9763	pos	-	-	-	-	-	0.0265252
metab_1125	-	-	-	4.5009	4.4506	4.4042	3.9564	4.5395	4.4925	4.4138	4.3565	4.535	4.6054	4.5544	4.5446	4.5854	4.3318	4.4653	4.5395	4.5536	4.3836	4.3663	4.3652	4.5372	4.3637	4.5725	4.434	4.4423	4.441	4.4267	4.4636	pos_1128	metab_1125	308.132	2.0637	pos	-	-	-	-	-	0.0352148
metab_1126	-	-	-	4.7008	4.7239	4.7194	4.4455	4.6763	4.6624	4.6326	4.6683	4.8663	4.7583	4.7266	4.9619	4.8958	4.8993	4.8927	4.9016	4.8953	4.8978	4.9705	5.0203	4.9988	5.0047	4.9894	4.9786	4.7905	4.7819	4.7904	4.7903	pos_1129	metab_1126	346.176	2.0637	pos	-	-	-	-	-	0.00971294
metab_1127	-	-	-	4.6993	4.6428	4.5294	4.1076	4.3173	4.3094	4.1421	4.2481	4.3687	4.4166	4.3562	4.6199	4.6826	4.6752	4.5799	4.7081	4.8068	4.7861	4.7716	4.6255	4.7332	4.8438	4.4649	4.804	4.5606	4.5646	4.5629	4.5607	pos_1130	metab_1127	352.223	2.0637	pos	-	-	-	-	-	0.00443735
metab_1128	-	-	-	4.4364	4.47	4.6471	3.8387	3.8634	3.8567	3.3919	3.8726	3.8634	4.0193	3.934	2.8053	3.0766	2.8099	2.9537	2.8001	2.8144	3.7639	3.5814	3.6814	3.946	3.851	3.8388	3.6228	3.8884	3.9037	3.8274	3.8713	pos_1131	metab_1128	392.255	2.0637	pos	-	-	-	-	-	0.0743547
metab_1129	-	-	-	4.1768	3.9985	4.0336	3.9207	4.0698	4.1813	4.1531	4.0252	4.4286	4.1928	4.2066	4.6354	4.4681	4.5174	4.5181	4.6577	4.5451	4.5334	5.2779	4.7296	4.5883	4.6562	4.5109	4.9024	4.4961	4.4982	4.4959	4.4996	pos_1132	metab_1129	380.182	2.0637	pos	-	-	-	-	-	0.0040889
metab_1130	-	-	-	4.5327	4.6213	4.5394	4.2923	4.6725	4.5737	4.5787	4.5466	4.7328	4.7543	4.6465	4.7167	4.8306	4.758	4.8529	4.5802	4.7922	4.8273	4.8571	4.7452	4.8054	4.8753	4.9328	4.8386	4.7061	4.7064	4.7083	4.7198	pos_1133	metab_1130	221.129	2.0859	pos	-	-	-	-	-	0.0150655
metab_1131	-	-	-	4.9519	4.9486	4.7863	4.662	4.9254	4.8192	4.9959	4.8969	5.0179	4.9322	4.9827	5.0936	5.1273	5.1074	5.1808	5.1053	5.2221	5.094	5.1411	5.0938	5.1315	5.1424	5.144	5.1487	5.0201	5.0276	5.023	5.0323	pos_1134	metab_1131	287.139	2.0859	pos	-	-	-	-	-	0.0123527
metab_1132	-	-	-	4.602	4.5661	4.5646	4.254	4.5189	4.3891	4.544	4.436	4.6695	4.5705	4.5256	4.9515	4.9713	4.8952	4.8847	4.9127	4.8982	4.9357	4.9439	4.9396	4.9658	4.9166	5.0112	5.0248	4.7412	4.7453	4.7411	4.751	pos_1135	metab_1132	336.192	2.0637	pos	-	-	-	-	-	0.0107071
metab_1133	-	-	-	4.011	4.1368	4.111	3.6682	3.7294	3.7574	3.5066	3.8162	3.9219	3.9579	3.928	3.1287	3.4215	3.4303	3.3553	3.256	3.3236	3.9663	3.5988	3.791	3.9056	3.8926	3.7007	3.9393	3.7631	3.6336	3.7607	3.7632	pos_1136	metab_1133	337.212	1.9763	pos	-	-	-	-	-	0.137108
metab_1134	-	-	-	4.7317	4.7829	4.6335	4.4339	4.7885	4.7234	4.7098	4.7046	4.8143	4.8702	4.7172	4.953	4.8548	4.8073	4.8219	4.7419	4.8153	4.8057	4.8659	4.7695	4.8168	4.8485	4.9056	4.8678	4.7674	4.7876	4.7923	4.7941	pos_1137	metab_1134	156.081	2.108	pos	-	-	-	-	-	0.0279035
metab_1135	-	-	-	4.4759	4.3319	4.3393	4.4717	4.3674	4.364	4.4122	4.3216	4.4653	4.5538	4.3184	4.8867	4.5643	4.5537	4.5888	4.625	4.7006	4.6088	4.7594	4.6744	4.652	4.6585	4.8021	4.5564	4.5248	4.5456	4.5353	4.5351	pos_1138	metab_1135	301.119	1.9763	pos	-	-	-	-	-	0.0195277
metab_1136	-	-	-	4.6785	4.6582	4.5112	4.3622	4.6771	4.6267	4.5638	4.5334	4.679	4.7094	4.5624	4.8319	4.8743	4.9416	4.9446	4.9096	4.8404	4.9426	4.759	4.8382	4.983	4.8523	4.8223	4.8811	4.746	4.7524	4.7461	4.7731	pos_1139	metab_1136	247.108	2.108	pos	-	-	-	-	-	0.0298693
metab_1137	-	-	-	3.9521	3.8609	3.7664	3.6691	3.9019	3.8833	3.8432	3.756	3.979	3.9276	3.9209	4.2089	4.1011	4.0645	4.1734	4.1912	4.1134	4.2302	4.0019	4.0654	4.1678	4.112	4.1927	4.1441	4.0223	4.0056	4.0163	4.0196	pos_1140	metab_1137	296.161	2.108	pos	-	-	-	-	-	0.0167971
metab_1138	-	-	-	4.3317	4.1011	4.0988	3.9399	4.3513	4.1734	4.3123	3.7635	4.7206	4.3096	3.8264	3.4943	3.4276	3.5412	3.4831	3.3976	3.469	3.6086	4.3474	4.1857	3.9255	4.2981	4.4147	4.3825	4.0754	4.094	4.107	4.0868	pos_1141	metab_1138	332.171	2.108	pos	-	-	-	-	-	0.0304781
metab_1139	-	-	-	4.8299	5.4349	5.1852	4.5028	5.2407	4.7981	5.2838	5.2734	5.0939	5.6048	5.4611	4.7845	4.8469	4.7939	4.8134	4.8163	4.8521	4.7989	4.8068	4.7476	5.1444	4.7926	4.841	4.8441	5.0861	5.0921	5.0976	5.0969	pos_1142	metab_1139	315.134	2.108	pos	-	-	-	-	-	0.0121748
metab_1140	-	-	-	3.9831	5.0426	4.745	3.6161	4.7849	3.361	4.7618	4.9117	4.0316	5.2553	5.0756	3.2517	2.4552	3.2723	2.4905	3.0473	3.4231	3.466	3.2514	3.374	4.6196	3.4005	3.379	3.4055	4.4674	4.4849	4.4694	4.4776	pos_1143	metab_1140	478.198	2.108	pos	-	-	-	-	-	0.0185732
metab_1141	-	-	-	4.5055	5.5542	5.3074	4.2349	5.3274	4.2306	5.3342	5.5025	4.6098	5.8258	5.6272	3.8229	3.8743	3.937	3.9634	3.8484	3.8507	4.0207	3.7453	3.975	5.0858	4.0526	3.9999	4.0826	5.0048	5.0312	5.0047	5.0066	pos_1144	metab_1141	506.193	2.108	pos	-	-	-	-	-	0.0301853
metab_1142	-	-	-	3.345	3.2236	2.9634	2.9327	3.9037	4.0367	3.7081	3.9137	4.2119	3.8465	3.8177	4.0235	3.9427	3.9611	4.0094	3.9102	3.796	3.8179	4.025	3.813	3.7886	3.7949	4.0886	3.7858	3.8395	3.8552	3.8596	3.8614	pos_1145	metab_1142	148.039	2.1296	pos	-	-	-	-	-	0.0226968
metab_1143	-	-	-	5.2113	5.1534	4.9834	4.6699	5.9389	6.0837	5.7426	5.9886	6.1788	5.8435	5.8506	5.9563	5.7476	5.8132	5.8818	5.4869	5.5623	5.4352	5.9508	5.5632	5.22	5.4578	5.9966	5.4532	5.7329	5.7455	5.7452	5.747	pos_1146	metab_1143	162.055	2.1296	pos	-	-	-	-	-	0.0150243
metab_1144	-	-	-	4.0301	3.9779	3.7911	3.8067	4.3491	4.4024	4.1936	4.3063	4.551	4.3408	4.2682	4.4561	4.3705	4.3776	4.469	4.2739	4.2923	4.2469	4.4608	4.2222	4.1712	4.3235	4.4699	4.3183	4.2835	4.287	4.2834	4.2964	pos_1147	metab_1144	185.071	2.1296	pos	-	-	-	-	-	0.0141453
metab_1145	-	-	-	4.2955	4.3981	4.2102	3.9835	4.4293	4.2998	4.4383	4.343	4.5932	4.3527	4.4266	4.5959	4.6111	4.5582	4.6348	4.5417	4.5553	4.6201	4.6446	4.678	4.6591	4.5351	4.6942	4.6187	4.4693	4.4694	4.4768	4.4868	pos_1148	metab_1145	183.113	2.1296	pos	-	-	-	-	-	0.0190942
4-Hydroxyindole	C02040	-	C8H7NO	4.4085	4.3661	4.2416	4.0556	5.0311	5.1487	4.8456	5.0496	5.2768	4.9444	4.9502	5.0798	4.8982	4.9408	4.9836	4.6739	4.7404	4.603	5.0526	4.7137	4.4763	4.6448	5.1069	4.635	4.8567	4.869	4.8619	4.8678	pos_1149	metab_1146	134.06	2.1296	pos	M+H-H2O, M+H	69.9	-	2.30136	-	0.0131111
metab_1147	-	-	-	1.4618	1.0513	0.7764	0.9724	4.2278	4.5044	3.7432	4.3588	4.5476	4.0044	4.2035	3.8941	3.5928	3.8534	3.8884	2.8098	2.9012	0.7414	4.1188	3.1987	0.9417	2.8272	4.1771	3.0128	3.6799	3.7257	3.671	3.6974	pos_1150	metab_1147	453.061	2.1296	pos	-	-	-	-	-	0.0561643
metab_1148	-	-	-	2.7471	2.6176	2.6132	2.4797	3.013	2.5931	2.5857	3.1998	3.5518	3.0295	2.6259	5.3088	5.2384	5.2766	5.2753	5.2026	5.3166	5.1796	4.9964	5.1382	5.1759	5.0187	5.128	5.0909	4.8619	4.86	4.8618	4.8567	pos_1151	metab_1148	462.095	2.1296	pos	-	-	-	-	-	0.00565409
metab_1149	-	-	-	4.8979	4.8777	4.8334	4.4024	4.9244	4.8482	4.7443	4.8422	4.9548	4.9341	4.8672	5.0522	5.0283	5.0334	5.0299	5.0278	5.027	4.929	4.9337	4.9482	4.93	4.8883	4.9812	4.959	4.894	4.8942	4.8896	4.8957	pos_1152	metab_1149	402.202	2.1296	pos	-	-	-	-	-	0.00600288
metab_1150	-	-	-	4.1232	4.1037	4.0537	3.7513	4.1014	3.9882	4.0839	4.0005	4.28	4.073	4.0688	3.9871	4.1235	3.9563	4.112	3.9962	4.0904	4.1319	4.1467	4.0903	4.0682	4.0048	4.0161	4.1292	4.0611	4.0378	4.0637	4.0657	pos_1153	metab_1150	255.17	2.1514	pos	-	-	-	-	-	0.0295613
metab_1151	-	-	-	4.7965	4.8475	4.9554	4.7132	4.3868	4.723	4.681	4.5642	4.9592	4.6754	4.5341	4.5216	4.2486	4.3835	4.4596	4.2325	4.4731	4.5574	4.8494	4.8605	4.456	4.9239	4.7799	4.9437	4.665	4.6658	4.6648	4.6684	pos_1154	metab_1151	302.196	2.1514	pos	-	-	-	-	-	0.00377287
metab_1152	-	-	-	5.316	5.1527	5.6231	5.0568	4.7615	5.1532	5.0531	4.8312	5.4408	5.2295	4.5942	4.2178	4.3493	4.5743	4.2066	4.1666	4.5608	4.5137	5.2693	5.2383	4.7666	5.093	5.0846	5.4036	5.0655	5.0726	5.0722	5.0741	pos_1155	metab_1152	346.187	2.1514	pos	-	-	-	-	-	0.00881157
metab_1153	-	-	-	4.3364	4.1478	4.2461	4.0578	3.7724	3.8046	3.7348	4.0383	4.4166	4.1773	4.1856	4.1818	4.1057	4.2091	4.1329	4.2416	4.1864	4.2647	4.6532	4.7467	4.4292	4.8809	4.6311	4.8057	4.2692	4.2693	4.266	4.2255	pos_1156	metab_1153	372.192	2.1514	pos	-	-	-	-	-	0.0480433
metab_1154	-	-	-	4.6035	4.5964	5.0288	3.5817	4.057	3.984	3.7088	4.1111	4.1359	4.1027	4.1316	3.7366	4.2377	4.2143	4.1156	4.1906	3.9038	4.4719	4.2487	4.4488	4.5168	4.2987	4.4629	4.4647	4.317	4.3691	4.3172	4.3247	pos_1157	metab_1154	418.234	2.1514	pos	-	-	-	-	-	0.0591616
metab_1155	-	-	-	4.0354	4.0848	3.766	3.6412	3.9667	3.9006	3.8585	4.2127	4.007	3.9754	4.203	4.806	4.7202	4.8456	4.8871	4.7722	4.6798	4.5065	4.7243	4.5707	4.4117	4.3854	4.578	4.5451	4.4039	4.4035	4.371	4.3921	pos_1158	metab_1155	444.211	2.1514	pos	-	-	-	-	-	0.0350869
metab_1156	-	-	-	3.9734	4.148	3.7569	3.9234	3.8356	3.7513	3.6308	3.9078	3.3826	3.9378	3.8385	3.8433	4.1725	4.0002	4.0907	4.1447	3.9158	4.3141	4.1639	4.2082	4.3787	4.2004	4.0883	4.2484	3.979	3.9064	3.9042	3.9001	pos_1159	metab_1156	412.208	2.1514	pos	-	-	-	-	-	0.0907267
metab_1157	-	-	-	3.8117	3.7075	3.5828	3.2874	3.6695	3.5624	3.8126	3.5684	4.0197	3.5123	3.7331	3.8624	4.0881	3.6973	3.8871	3.7118	3.8571	4.1539	4.1479	4.2942	4.0909	4.1578	4.2833	4.1723	3.8882	3.9036	3.9163	3.9477	pos_1160	metab_1157	219.149	2.1736	pos	-	-	-	-	-	0.0588466
metab_1158	-	-	-	4.2076	4.1661	4.205	3.8311	4.078	4.1579	4.1763	4.0341	4.2924	4.2116	4.0773	4.3062	4.2979	4.2681	4.231	4.1755	4.3028	4.2409	4.3219	4.261	4.2771	4.3102	4.3569	4.3204	4.2039	4.1995	4.1797	4.2056	pos_1161	metab_1158	259.108	2.1736	pos	-	-	-	-	-	0.0270738
metab_1159	-	-	-	3.0532	3.3514	2.4889	2.7825	2.5915	2.4818	3.2255	2.4498	3.2767	2.9673	3.4038	4.9096	3.4424	3.5766	3.4147	3.5241	3.4681	3.8148	4.9666	4.8767	3.9026	3.898	3.9831	5.1353	4.2029	4.2212	4.2037	4.2573	pos_1162	metab_1159	343.14	2.1736	pos	-	-	-	-	-	0.0598546
Riboflavin (Vitamin B2)	-	-	C17H20N4O6	5.2099	5.3361	5.3984	5.4085	5.4209	5.3931	5.208	5.4624	5.2773	5.34	5.3841	5.1399	4.8024	5.3391	5.1316	5.1045	5.1644	5.1157	5.0103	5.3453	4.9566	5.1378	5.4252	4.9261	5.3011	5.2983	5.2954	5.3035	pos_1163	metab_1160	377.146	2.1736	pos	M+H, M+Na	71.3	-	0.175871	-	0.00810716
metab_1161	-	-	-	4.8434	4.7381	4.5819	4.7863	4.8469	4.739	4.7089	4.6195	4.8581	4.8924	4.8034	5.0436	4.995	5.0044	4.9629	4.9547	5.0079	4.8905	4.833	4.8298	4.8882	4.9044	4.9386	4.9317	4.8331	4.8349	4.8313	4.8369	pos_1164	metab_1161	347.124	2.1736	pos	-	-	-	-	-	0.00544201
metab_1162	-	-	-	4.402	4.4047	4.2938	4.1641	4.3956	4.4346	4.404	4.2641	4.4933	4.4143	4.3759	4.1989	4.1077	4.2034	4.1724	4.1255	4.2046	4.0755	4.1527	4.1324	4.1753	4.1362	4.2183	4.2043	4.2577	4.2581	4.2649	4.2755	pos_1165	metab_1162	191.107	2.1955	pos	-	-	-	-	-	0.0192891
metab_1163	-	-	-	4.5962	4.6234	4.5437	4.1667	4.4378	4.3648	4.3225	4.4681	4.437	4.5688	4.5009	4.7864	4.8504	4.8143	4.8287	4.8416	4.8858	4.9046	4.8388	4.8056	4.8889	4.8664	4.7837	4.8683	4.6765	4.6767	4.6795	4.6802	pos_1166	metab_1163	338.207	2.1736	pos	-	-	-	-	-	0.00442187
metab_1164	-	-	-	4.9098	4.8906	4.587	4.1965	4.4689	4.5085	4.5497	4.3024	4.5976	4.6481	4.452	4.6973	4.6673	4.6984	4.6142	4.5191	4.7768	4.6644	4.6978	4.6554	4.6962	4.5573	4.6992	4.6065	4.5956	4.5958	4.6001	4.6094	pos_1167	metab_1164	283.148	2.1955	pos	-	-	-	-	-	0.0149058
metab_1165	-	-	-	5.132	5.1949	5.1133	4.8723	5.1902	5.247	5.1482	5.0868	5.176	5.215	5.2429	4.9699	5.0693	5.0172	5.0821	5.0347	5.1124	5.116	5.0399	5.1104	5.1871	5.0963	5.0949	5.1428	5.111	5.1085	5.1159	5.11	pos_1168	metab_1165	326.171	2.1955	pos	-	-	-	-	-	0.00745372
metab_1166	-	-	-	4.5275	4.4844	4.3999	4.2418	4.3041	4.2519	4.2725	4.1709	4.3315	4.3298	4.3634	4.341	4.361	4.3097	4.26	4.3552	4.3996	4.444	4.334	4.2419	4.2985	4.3251	4.3837	4.3935	4.3354	4.3243	4.3263	4.3258	pos_1169	metab_1166	375.155	2.1955	pos	-	-	-	-	-	0.0116708
metab_1167	-	-	-	4.4176	4.2466	4.2824	4.0563	4.2343	4.2785	4.2191	4.2281	4.3712	4.4575	4.2496	4.6479	4.6227	4.5899	4.5369	4.6278	4.626	4.6461	4.5457	4.6201	4.667	4.5532	4.6949	4.6516	4.4112	4.4116	4.4113	4.4307	pos_1170	metab_1167	389.171	2.1955	pos	-	-	-	-	-	0.0224772
metab_1168	-	-	-	3.647	4.1006	3.6106	3.3958	3.7598	3.8149	3.5836	3.2761	3.9704	3.7077	3.6206	3.3639	3.3625	3.3685	3.3736	3.3587	3.6333	3.3566	3.3265	3.3568	3.3809	3.3531	3.38	3.3732	3.4615	3.335	3.3302	3.3689	pos_1171	metab_1168	511.289	2.1955	pos	-	-	-	-	-	0.14766
metab_1169	-	-	-	5.3689	5.4091	5.5198	5.0253	5.2871	5.184	5.3454	5.2101	5.3668	5.3412	5.2994	5.4774	5.4129	5.4233	5.3931	5.3148	5.4777	5.2615	5.3461	5.3516	5.3125	5.3433	5.4342	5.3462	5.3449	5.3451	5.3501	5.3499	pos_1172	metab_1169	144.081	2.2177	pos	-	-	-	-	-	0.00661191
metab_1170	-	-	-	5.6067	5.706	5.6222	4.1362	4.3587	4.1587	4.3104	4.1776	4.4345	4.4356	4.3883	4.0353	4.2507	4.1707	4.1788	4.1867	4.3955	4.4508	4.5964	4.3874	4.6256	4.6371	4.518	4.417	4.9333	4.9233	4.9455	4.9302	pos_1173	metab_1170	456.249	2.1955	pos	-	-	-	-	-	0.0214177
metab_1171	-	-	-	4.5417	4.2982	4.4692	3.7263	4.4349	4.2796	4.1078	4.3618	4.2184	4.3951	4.3663	4.5463	4.6583	4.6109	4.6814	4.6405	4.6809	4.4219	4.382	4.4151	4.5194	4.4644	4.4406	4.4551	4.4022	4.3852	4.3795	4.3813	pos_1174	metab_1171	420.213	2.1955	pos	-	-	-	-	-	0.0241606
metab_1172	-	-	-	4.2973	4.575	4.5408	3.3844	3.9152	3.7522	3.5862	4.1189	3.7726	4.0007	3.9859	2.5845	3.2654	3.0386	2.5942	3.2083	3.3289	4.096	3.9454	4.1885	4.2491	4.2219	4.0468	3.9302	3.9947	3.9743	4.0014	4.0034	pos_1175	metab_1172	360.228	2.2177	pos	-	-	-	-	-	0.0301599
metab_1173	-	-	-	5.1144	5.0982	5.0053	4.7862	5.1659	5.0631	5.1329	5.0599	5.3421	5.1473	5.1397	5.361	5.3058	5.3303	5.315	5.3213	5.3202	5.3099	5.3212	5.3137	5.3217	5.2983	5.3742	5.3404	5.2133	5.2136	5.2168	5.2219	pos_1176	metab_1173	130.065	2.2398	pos	-	-	-	-	-	0.00919015
metab_1174	-	-	-	4.1483	4.2686	4.0304	3.7526	4.4543	4.4886	4.3545	4.481	4.674	4.5059	4.5241	3.8063	3.8753	3.7982	4.0029	3.9318	4.1232	3.9802	4.1154	4.1213	4.4427	4.125	4.0258	3.8848	4.2194	4.2269	4.2328	4.2346	pos_1177	metab_1174	146.118	2.2398	pos	-	-	-	-	-	0.0157613
metab_1175	-	-	-	4.5323	4.5367	4.3819	4.2029	4.9193	4.8531	4.8887	4.7572	5.1419	4.9026	4.8856	4.5741	4.5375	4.4577	4.5552	4.6056	4.7432	4.4717	4.7786	4.5574	4.4605	4.3653	4.4871	4.5361	4.6749	4.676	4.6841	4.6875	pos_1178	metab_1175	163.039	2.2398	pos	-	-	-	-	-	0.0141356
metab_1176	-	-	-	3.7856	3.496	3.5228	3.3358	3.5288	3.4175	3.3505	3.2833	2.886	3.3695	3.5551	3.8599	3.9983	3.7482	3.8757	3.8272	3.7697	3.6694	3.589	3.5575	3.626	3.618	3.5814	3.6565	3.6364	3.5305	3.5291	3.5291	pos_1179	metab_1176	212.055	2.2398	pos	-	-	-	-	-	0.130435
metab_1177	-	-	-	3.6502	3.6555	3.5406	3.2305	3.728	3.4426	3.8368	3.7	3.9813	3.5069	3.5485	3.7943	3.9556	3.8132	3.8832	3.8731	3.9139	3.5881	3.6357	3.6496	3.4643	3.4138	3.5699	3.366	3.7241	3.6845	3.6843	3.6862	pos_1180	metab_1177	140.047	2.2398	pos	-	-	-	-	-	0.046116
metab_1178	-	-	-	4.1285	4.1265	3.9414	3.8945	4.0712	3.8409	4.0841	4.0222	4.2802	3.9331	4.089	4.7363	4.7422	4.568	4.5787	4.5989	4.6798	4.7262	4.6992	4.7731	4.8642	4.6743	4.8934	4.7015	4.4722	4.4464	4.472	4.474	pos_1181	metab_1178	298.14	2.2398	pos	-	-	-	-	-	0.0299291
metab_1179	-	-	-	4.0087	3.941	3.909	3.6728	3.8148	3.7092	3.7963	3.8764	3.9518	4.0141	3.9037	4.0494	4.1984	3.8946	3.9843	4.1006	4.1401	4.1293	4.1899	4.1463	4.1688	4.2039	4.1844	4.1202	4.0377	4.0379	4.0322	4.0232	pos_1182	metab_1179	449.222	2.2398	pos	-	-	-	-	-	0.0157969
metab_1180	-	-	-	4.2701	4.6277	4.3983	3.6614	4.2388	4.0466	4.2962	4.4113	4.2698	4.5891	4.483	4.322	4.5616	4.4231	4.4198	4.3841	4.3588	4.4296	4.4169	4.3745	4.564	4.2385	4.403	4.3652	4.365	4.3461	4.3403	4.3419	pos_1183	metab_1180	456.213	2.2398	pos	-	-	-	-	-	0.0265147
metab_1181	-	-	-	3.9462	3.9594	3.7496	3.7546	3.7766	3.9722	3.6847	3.821	3.9274	3.865	4.0491	4.3229	4.3387	4.3194	4.3108	4.3538	4.3266	4.2893	4.2996	4.2701	4.3808	4.2931	4.3701	4.2947	4.0965	4.0967	4.1018	4.1025	pos_1184	metab_1181	435.266	2.2398	pos	-	-	-	-	-	0.00737021
metab_1182	-	-	-	4.8295	4.9506	4.7563	4.5938	4.9471	4.8572	4.8815	4.7761	5.0046	4.9739	4.8912	4.6853	4.758	4.6628	4.7424	4.6785	4.7293	4.6905	4.6654	4.7321	4.7456	4.7387	4.7475	4.7643	4.782	4.785	4.7819	4.7959	pos_1185	metab_1182	170.06	2.262	pos	-	-	-	-	-	0.0153767
metab_1183	-	-	-	3.9534	3.9194	3.7079	3.4895	4.04	4.0744	3.7707	3.9187	4.2459	4.0946	4.0107	4.0191	3.9178	3.9699	4.0457	3.9985	3.931	3.8281	3.8965	3.8443	3.8904	3.7778	4.0549	3.7852	3.9637	3.9451	3.9259	3.9525	pos_1186	metab_1183	188.034	2.262	pos	-	-	-	-	-	0.0363091
metab_1184	-	-	-	3.704	3.723	3.551	3.4358	3.8652	3.8034	3.7873	3.7132	3.9348	3.8794	3.7825	3.3024	3.3843	3.385	3.3025	3.3639	3.1992	3.2581	3.2143	3.238	3.3092	3.2864	3.3842	3.3072	3.4963	3.5081	3.5438	3.4931	pos_1187	metab_1184	197.044	2.262	pos	-	-	-	-	-	0.0546153
metab_1185	-	-	-	3.4826	3.289	3.2276	3.2967	4.0634	3.877	4.0683	3.6508	4.1164	4.0743	3.8641	4.1124	4.0835	4.096	4.0865	4.0315	3.9805	3.9497	4.006	4.0058	4.0232	4.1401	4.2923	4.0811	3.9556	4.0053	3.9945	4.0063	pos_1188	metab_1185	288.135	2.262	pos	-	-	-	-	-	0.05351
metab_1186	-	-	-	4.2741	4.2177	4.0902	3.5231	4.3445	4.1237	4.4111	4.0806	4.5263	4.1675	4.274	4.0013	4.2352	3.9425	4.1356	4.3134	4.3561	4.2072	4.2682	4.4935	4.2135	4.0658	4.1543	4.1553	4.1895	4.1899	4.1817	4.1837	pos_1189	metab_1186	328.223	2.262	pos	-	-	-	-	-	0.0094976
metab_1187	-	-	-	5.1361	5.0803	5.0572	5.1844	5.175	4.9691	5.0103	4.9968	5.1229	5.1218	5.0859	5.0353	4.7219	4.7717	4.9472	5.2101	4.7679	4.6331	4.6168	4.6066	4.5474	4.6063	4.62	4.7698	4.9494	4.9633	4.9702	4.9721	pos_1190	metab_1187	357.181	2.262	pos	-	-	-	-	-	0.0234921
metab_1188	-	-	-	4.3402	4.2643	4.0363	3.7901	4.2408	4.0775	4.0542	4.1919	4.2834	4.2675	4.2001	4.0051	4.127	3.9946	4.1037	4.127	4.0854	4.1032	4.1123	4.0984	4.2398	4.2279	4.0942	4.1064	4.1182	4.1189	4.1062	4.0966	pos_1191	metab_1188	373.245	2.262	pos	-	-	-	-	-	0.0243906
metab_1189	-	-	-	4.2591	4.2472	4.2113	3.9272	4.3284	4.2618	4.2234	4.2045	4.3329	4.3952	4.0007	4.6408	4.7748	4.6459	4.6686	4.7236	4.6801	4.7578	4.7996	4.7596	4.8021	4.7003	4.7802	4.7402	4.5008	4.5295	4.5088	4.5028	pos_1192	metab_1189	401.171	2.262	pos	-	-	-	-	-	0.0306518
metab_1190	-	-	-	4.7983	4.8356	4.6413	4.4884	4.7646	4.6369	4.6817	4.6575	4.6841	4.8951	4.7384	4.4952	4.5058	4.4689	4.5604	4.6011	4.5076	4.5295	4.5278	4.4825	4.6672	4.5992	4.5874	4.5724	4.6059	4.6008	4.6264	4.6022	pos_1193	metab_1190	515.203	2.262	pos	-	-	-	-	-	0.0278245
metab_1191	-	-	-	4.1461	3.9438	3.9596	3.3273	3.6459	3.6315	3.7057	3.3965	3.9292	3.8173	3.7133	4.5399	4.6278	4.5057	4.5383	4.6341	4.6068	3.848	3.8947	3.7426	3.7811	3.7322	3.8824	3.8745	4.0755	4.0673	4.1245	4.0689	pos_1194	metab_1191	305.186	2.262	pos	-	-	-	-	-	0.0645475
metab_1192	-	-	-	4.25	4.2734	4.054	3.9214	4.1851	4.1235	4.194	4.1253	4.2822	4.2572	4.1689	4.4554	4.4687	4.4272	4.4675	4.4129	4.4876	4.4192	4.4318	4.4189	4.502	4.4462	4.5075	4.4963	4.3247	4.3248	4.3323	4.3396	pos_1195	metab_1192	168.081	2.2842	pos	-	-	-	-	-	0.0164369
metab_1193	-	-	-	4.096	4.1946	3.9575	3.7848	3.9304	3.8061	3.7079	3.9095	3.8624	3.8971	4.059	3.9938	4.2942	4.1603	3.9336	4.0756	4.0195	3.9718	3.8915	3.8809	4.2026	4.0865	4.0435	4.0066	3.9646	3.9682	3.9643	3.999	pos_1196	metab_1193	218.154	2.2842	pos	-	-	-	-	-	0.0392145
metab_1194	-	-	-	3.7484	3.7233	3.6955	3.2407	3.5731	3.3206	3.8336	3.4157	3.9678	3.5962	3.5736	3.6303	3.4014	3.4826	3.8268	3.688	3.8207	3.4563	3.9978	3.6865	3.4263	3.2423	3.4335	3.5574	3.5725	3.5551	3.5552	3.5957	pos_1197	metab_1194	313.212	2.2842	pos	-	-	-	-	-	0.0447883
metab_1195	-	-	-	4.4317	4.3858	4.3899	4.1815	4.3774	4.2552	4.2059	4.1146	4.2926	4.4057	4.2406	4.9124	4.8535	4.7985	4.7981	4.8003	4.9871	4.8347	4.8003	4.6671	4.8857	4.8837	4.8405	4.7981	4.6965	4.6761	4.6735	4.6753	pos_1198	metab_1195	352.169	2.2842	pos	-	-	-	-	-	0.0251631
SN-38	C16641;C11173	HMDB0060510	C22H20N2O5	4.4341	4.3158	4.4321	3.9634	4.2542	4.1286	4.5513	4.4061	4.5749	4.3953	4.3448	4.158	3.7624	4.307	3.9468	3.776	3.9344	3.9027	4.2892	4.1519	3.9217	4.2021	4.3574	3.9343	4.0088	4.0246	3.9974	4.0784	pos_1199	metab_1196	375.13	2.2842	pos	M+H-H2O, M+CH3OH+H	-	61.9	-9.88997	-	0.0849692
metab_1197	-	-	-	4.7096	5.0673	5.1509	3.5581	4.171	4.0718	3.7197	4.5268	3.8851	4.4464	4.2591	1.5782	2.7617	1.5827	1.5877	2.6722	1.5871	3.2202	3.0832	1.5713	3.5582	3.1312	1.5939	1.5873	4.2533	4.2535	4.2425	4.2026	pos_1200	metab_1197	517.303	2.2842	pos	-	-	-	-	-	0.0542016
metab_1198	-	-	-	4.8739	4.8213	4.7464	4.5028	4.8543	4.7026	4.6619	4.7309	4.8701	4.8706	4.8079	4.8255	4.8661	4.8115	4.8335	4.8785	4.8918	4.8015	4.8048	4.8023	4.857	4.8542	4.8457	4.8948	4.8089	4.8092	4.8115	4.8124	pos_1201	metab_1198	373.176	2.2842	pos	-	-	-	-	-	0.00401841
metab_1199	-	-	-	3.3924	3.1034	3.2247	2.7166	3.3842	3.2888	2.5998	3.101	3.3603	3.4427	3.4201	3.7053	3.7243	3.9277	3.9983	3.9856	3.2848	4.0009	3.3286	3.9215	3.9419	3.4566	3.6388	3.8272	3.5877	3.6428	3.6039	3.5904	pos_1202	metab_1199	223.06	2.3059	pos	-	-	-	-	-	0.05992
metab_1200	-	-	-	4.3724	4.4962	4.32	4.0621	4.4644	4.3121	4.7097	4.3856	4.7661	4.4603	4.5437	4.5312	4.6312	4.4459	4.5585	4.5493	4.7234	4.5227	4.622	4.578	4.6111	4.5165	4.5665	4.5586	4.5123	4.5373	4.5312	4.5598	pos_1203	metab_1200	260.161	2.2842	pos	-	-	-	-	-	0.0451448
metab_1201	-	-	-	3.666	3.5654	3.6009	3.1203	3.6135	3.2498	3.1736	3.3995	3.7095	3.3953	3.3946	3.5793	3.9473	3.5193	3.1445	3.6072	3.6235	3.9062	3.6283	3.9299	4.0398	4.0125	3.789	3.8839	3.6056	3.5908	3.5701	3.536	pos_1204	metab_1201	358.213	2.3059	pos	-	-	-	-	-	0.0684599
metab_1202	-	-	-	4.3799	4.3804	4.2416	4.0316	4.2997	4.1682	4.2508	4.2406	4.3885	4.3588	4.3464	4.5751	4.6132	4.5915	4.4789	4.6087	4.6062	4.7134	4.6297	4.6864	4.7836	4.7661	4.7269	4.6525	4.4523	4.4527	4.446	4.4153	pos_1205	metab_1202	378.203	2.3059	pos	-	-	-	-	-	0.0401733
metab_1203	-	-	-	4.1151	3.8891	3.9927	3.6985	3.8339	3.8614	3.9036	3.7464	3.7969	4.028	3.99	4.0812	4.1161	3.9752	4.0223	3.9338	4.0334	3.7318	3.9268	3.7474	3.5935	3.7404	3.7321	3.7776	3.9002	3.8955	3.9061	3.9091	pos_1206	metab_1203	149.024	2.3281	pos	-	-	-	-	-	0.013909
metab_1204	-	-	-	4.3098	4.3437	4.2861	3.9842	4.3374	4.2624	4.3256	4.262	4.3256	4.3991	4.2789	4.5465	4.5207	4.5318	4.5591	4.4385	4.5235	4.4972	4.5584	4.5096	4.5793	4.5189	4.6315	4.5477	4.4299	4.4234	4.4231	4.4647	pos_1207	metab_1204	214.086	2.2842	pos	-	-	-	-	-	0.0466997
metab_1205	-	-	-	4.8962	3.7255	4.1346	3.2463	3.4135	3.4311	3.3365	3.2111	3.7515	3.5311	3.4174	3.725	4.2344	3.7376	3.8831	3.8145	3.921	4.2288	4.1638	4.2672	4.4385	4.3794	4.035	4.7145	4.0468	4.047	4.0415	4.0185	pos_1208	metab_1205	303.228	2.262	pos	-	-	-	-	-	0.0306614
metab_1206	-	-	-	4.0516	4.261	3.9575	3.801	4.4553	4.4615	4.2664	4.5065	4.4781	4.4707	4.3783	4.1961	4.0492	4.0136	4.171	3.8523	3.7826	4.0277	4.5057	4.2123	3.9078	4.2432	4.4316	4.2014	4.2232	4.2383	4.225	4.2306	pos_1209	metab_1206	244.097	2.262	pos	-	-	-	-	-	0.0157385
metab_1207	-	-	-	4.7776	4.7144	4.6562	4.4643	4.7163	4.6678	4.6954	4.6061	4.747	4.8398	4.7234	4.7168	4.6805	4.6311	4.6346	4.6719	4.7073	4.614	4.6212	4.5777	4.5321	4.5678	4.6565	4.6552	4.6437	4.644	4.6479	4.6545	pos_1210	metab_1207	202.107	2.3505	pos	-	-	-	-	-	0.0115864
metab_1208	-	-	-	4.4049	4.3538	4.2591	4.1389	4.4056	4.1706	4.2421	4.2431	4.3004	4.1942	4.2765	4.7094	4.772	4.6121	4.6474	4.6924	4.7514	4.6803	4.6007	4.6026	4.6469	4.531	4.6573	4.6471	4.48	4.4512	4.4504	4.462	pos_1211	metab_1208	358.176	2.3505	pos	-	-	-	-	-	0.0320323
metab_1209	-	-	-	3.7639	3.8126	3.6843	4.5789	3.7858	3.4875	3.6196	3.6043	3.5718	3.6321	3.6273	3.8374	3.9368	3.9437	3.9032	3.8695	4.095	3.9669	3.8348	3.7872	5.303	5.2089	3.7689	3.7203	4.348	4.3275	4.3472	4.3396	pos_1212	metab_1209	444.277	2.3505	pos	-	-	-	-	-	0.0217831
metab_1210	-	-	-	5.776	5.6789	5.5172	5.0615	4.323	4.2545	4.3307	4.2034	4.4719	4.5264	4.3015	4.4608	4.4873	4.4483	4.4825	4.4697	4.5531	4.4199	4.4498	4.3679	4.4995	4.4156	4.4991	4.4393	4.9911	4.9738	4.9657	4.9674	pos_1213	metab_1210	602.308	2.3505	pos	-	-	-	-	-	0.0269482
metab_1211	-	-	-	4.3627	4.353	4.2246	4.228	4.3495	4.1198	4.3322	4.2514	4.4107	4.4385	4.3483	4.5382	4.6795	4.5621	4.6094	4.57	4.6417	4.6253	4.6401	4.5732	4.749	4.702	4.6376	4.6341	4.5031	4.5033	4.5006	4.4993	pos_1214	metab_1211	467.287	2.3505	pos	-	-	-	-	-	0.00447456
metab_1212	-	-	-	3.5233	3.9723	3.8374	6.0117	3.1854	2.0059	3.5269	3.2678	3.8487	2.4024	3.0126	2.9684	3.6773	2.1174	2.8118	3.1977	3.5303	4.6434	4.7989	4.6743	6.7195	6.6377	4.8414	4.1638	5.712	5.7062	5.7103	5.6944	pos_1215	metab_1212	442.27	2.3505	pos	-	-	-	-	-	0.0181286
metab_1213	-	-	-	4.4627	4.4114	4.3231	4.0536	4.4098	4.3499	4.4166	4.3188	4.5478	4.483	4.3137	4.4915	4.5912	4.4693	4.5802	4.4513	4.4944	4.5034	4.6344	4.5245	5.2263	5.1143	4.654	4.6007	4.5738	4.5728	4.5997	4.5742	pos_1216	metab_1213	267.17	2.3723	pos	-	-	-	-	-	0.0305638
metab_1214	-	-	-	3.879	3.4137	3.7061	3.5692	3.6775	3.639	3.6017	3.6794	4.0744	3.9457	4.1011	4.1425	3.9502	4.8553	4.908	4.2827	4.8989	4.8512	4.3239	4.9289	4.0995	4.186	4.8778	4.5838	4.3253	4.3104	4.3297	4.3316	pos_1217	metab_1214	383.168	2.3723	pos	-	-	-	-	-	0.0218394
metab_1215	-	-	-	4.1592	4.3798	4.2184	4.22	4.3282	4.0733	4.3288	4.3298	4.4102	4.1534	4.3793	4.472	4.6131	4.5885	4.5849	4.7029	4.6648	4.6101	4.5895	4.6453	4.5972	4.4734	4.5948	4.652	4.4606	4.4128	4.4554	4.4627	pos_1218	metab_1215	399.224	2.3723	pos	-	-	-	-	-	0.0528895
metab_1216	-	-	-	4.1567	4.0239	3.9099	4.3845	3.7526	3.9846	4.0783	3.7721	4.0507	4.1625	3.8072	3.8368	3.9816	3.8011	3.8465	3.9202	4.0017	3.8628	3.7561	3.8351	5.7625	5.5596	3.9828	3.9684	4.6381	4.6299	4.6321	4.6314	pos_1219	metab_1216	472.281	2.3723	pos	-	-	-	-	-	0.00832367
metab_1217	-	-	-	3.3264	2.5797	3.3311	3.2552	3.4191	3.1117	2.6631	3.7629	3.671	3.8637	3.4541	5.5288	5.4731	5.4343	5.4109	5.3395	5.5137	5.3626	5.1909	5.3456	5.3551	5.234	5.318	5.3265	5.0826	5.0655	5.0575	5.0592	pos_1220	metab_1217	462.095	2.3723	pos	-	-	-	-	-	0.0266414
metab_1218	-	-	-	3.8177	3.8371	3.79	3.6639	3.9324	3.9283	3.963	3.8402	4.1215	3.9864	3.7633	3.7913	3.664	3.7799	3.7438	3.6796	3.8095	3.6891	3.7044	3.7165	4.4955	4.419	3.8348	3.6818	3.8949	3.8953	3.9014	3.9033	pos_1221	metab_1218	179.107	2.3945	pos	-	-	-	-	-	0.00979184
metab_1219	-	-	-	4.4193	4.3547	4.32	3.5075	3.786	3.6276	3.8305	3.4192	3.8388	3.5964	3.9321	4.9789	4.9774	4.9063	4.8946	4.9538	5.0496	4.1111	4.169	4.161	4.2188	4.0957	4.3544	4.1298	4.4559	4.4561	4.4814	4.4576	pos_1222	metab_1219	339.171	2.3945	pos	-	-	-	-	-	0.0290752
metab_1220	-	-	-	4.2103	4.2021	4.0717	4.0773	4.387	4.2726	4.3657	4.2263	4.4814	4.4855	4.2663	4.5017	4.3771	4.3344	4.3319	4.2627	4.4753	4.4641	4.5206	4.455	4.6076	4.4966	4.5574	4.4141	4.3712	4.3541	4.3769	4.3787	pos_1223	metab_1220	263.103	2.3945	pos	-	-	-	-	-	0.0255948
metab_1221	-	-	-	4.6322	5.0088	4.8182	4.0745	4.0309	4.0457	4.0251	4.503	4.0254	4.4083	4.3477	3.97	3.7964	3.9844	4.0575	4.1822	3.9601	4.3749	4.3722	4.2542	4.3485	4.1739	4.1978	4.1413	4.3379	4.3423	4.3447	4.3186	pos_1224	metab_1221	529.262	2.3945	pos	-	-	-	-	-	0.0270364
metab_1222	-	-	-	4.3745	4.6096	4.4352	4.1541	4.5067	4.487	4.6384	4.5112	4.6991	4.4588	4.6515	4.3968	4.4333	4.2848	4.3727	4.4237	4.5358	4.4034	4.4321	4.493	4.5502	4.3301	4.371	4.4029	4.4592	4.4594	4.4591	4.489	pos_1225	metab_1222	171.113	2.3945	pos	-	-	-	-	-	0.0348658
metab_1223	-	-	-	3.9566	3.9603	3.6637	3.5774	3.9012	3.6472	3.7367	3.846	3.8825	3.8976	3.7394	4.0048	4.0244	3.9483	3.9282	4.2292	4.1527	4.3507	4.2615	4.3226	4.4219	4.2071	4.2135	4.2189	3.9854	3.9791	3.9788	3.9871	pos_1226	metab_1223	288.171	2.4168	pos	-	-	-	-	-	0.00995305
metab_1224	-	-	-	4.3028	4.232	4.1402	4.0803	4.3066	4.1933	4.2453	4.1098	4.3149	4.3197	4.2373	4.2471	4.2626	4.2391	4.2206	4.3051	4.2902	4.3389	4.2253	4.1382	4.288	4.2999	4.2857	4.2325	4.2347	4.2349	4.2033	4.2294	pos_1227	metab_1224	317.113	2.4168	pos	-	-	-	-	-	0.0341886
metab_1225	-	-	-	4.5185	4.3025	4.5857	3.7399	4.0037	3.9948	3.8325	4.0617	4.079	4.08	4.1306	4.5058	4.6878	4.4872	4.7006	4.6306	4.727	4.6874	4.722	4.688	4.8462	4.8849	4.7192	4.8511	4.5208	4.5172	4.5169	4.5388	pos_1228	metab_1225	355.202	2.4168	pos	-	-	-	-	-	0.0242515
metab_1226	-	-	-	3.84	4.0517	4.4216	3.7074	3.2103	2.8671	1.9139	3.2506	2.0248	2.0193	3.1891	2.0279	2.0266	2.0325	2.0376	2.0228	2.037	2.0207	1.9909	2.0209	4.9638	4.9623	2.0439	2.0372	3.806	3.8096	3.7155	3.8109	pos_1229	metab_1226	502.291	2.4168	pos	-	-	-	-	-	0.10174
metab_1227	-	-	-	3.0241	2.9679	3.2749	4.7357	3.1181	2.7878	2.4623	2.9334	2.901	3.0548	2.9902	1.6149	2.0024	2.2075	1.6244	1.6098	2.3219	2.407	2.0447	2.3972	4.7134	4.699	2.4965	1.9695	3.4676	3.1953	3.5021	3.5056	pos_1230	metab_1227	500.312	2.4168	pos	-	-	-	-	-	0.286065
metab_1228	-	-	-	3.2522	3.5483	3.4646	2.9987	3.6532	3.7774	3.9186	3.2202	3.9756	3.8082	3.396	3.5537	3.6753	3.5551	3.5942	3.6637	3.6284	3.496	3.6773	3.6027	3.6106	3.5803	3.6654	3.6739	3.4542	3.4553	3.5295	3.491	pos_1231	metab_1228	228.102	2.4387	pos	-	-	-	-	-	0.0836463
metab_1229	-	-	-	5.9175	5.9716	5.776	5.2611	3.4854	3.18	3.1134	3.2484	3.5138	3.4297	3.4156	3.2632	3.5069	3.6429	3.5412	3.3818	3.4187	4.5478	4.7026	4.5646	5.2994	5.1278	4.7459	4.2365	5.2054	5.2174	5.2228	5.2247	pos_1232	metab_1229	294.218	2.4387	pos	-	-	-	-	-	0.0198793
metab_1230	-	-	-	4.9636	5.0414	4.5645	4.6992	4.9182	4.872	4.999	5.0951	5.285	4.9051	5.1554	4.8166	4.9559	4.8634	4.9836	4.864	5.0862	4.8461	4.8937	4.8192	4.8678	4.805	4.9535	4.871	4.9414	4.9448	4.96	4.951	pos_1233	metab_1230	285.123	2.4387	pos	-	-	-	-	-	0.0188949
metab_1231	-	-	-	4.5976	4.601	4.4978	4.1566	3.9216	3.9344	3.8738	3.8542	4.2149	4.1529	4.1317	4.2757	4.4922	4.4994	4.4715	4.5316	4.4464	4.4587	4.6271	4.5752	4.567	4.5083	4.5661	4.5881	4.3691	4.3666	4.3628	4.3707	pos_1234	metab_1231	369.178	2.4387	pos	-	-	-	-	-	0.00791132
metab_1232	-	-	-	3.9502	3.8252	4.4259	3.7726	4.2131	4.2493	4.149	3.6681	4.3006	4.0799	3.7974	3.8385	3.9709	3.9184	3.9156	3.8193	4.0217	4.0446	4.5497	4.7383	4.6471	4.587	4.3462	4.7327	4.2388	4.2422	4.2386	4.2439	pos_1235	metab_1232	301.223	2.4168	pos	-	-	-	-	-	0.0060587
metab_1233	-	-	-	4.958	5.4434	5.4718	4.1863	4.5452	4.4904	4.4702	4.8592	4.675	4.6004	4.6214	3.7611	3.9816	4.0684	4.0015	4.1064	4.1276	4.5429	4.1822	4.2409	4.6067	4.4066	4.2731	4.372	4.717	4.7142	4.7196	4.7032	pos_1236	metab_1233	509.297	2.4387	pos	-	-	-	-	-	0.0164662
metab_1234	-	-	-	4.3502	4.364	4.2174	3.9609	4.1975	4.0562	4.2089	4.0945	4.1681	4.2782	4.1681	4.3028	4.2475	4.3157	4.3423	4.2535	4.3234	4.3536	4.225	4.2645	4.329	4.2618	4.3579	4.2677	4.2198	4.2201	4.2229	4.2247	pos_1237	metab_1234	259.144	2.4609	pos	-	-	-	-	-	0.00546987
metab_1235	-	-	-	4.6707	4.6949	4.6127	4.3611	4.6069	4.4658	4.4118	4.5184	4.4247	4.6437	4.5228	4.4502	4.4602	4.3365	4.4256	4.447	4.4332	4.4729	4.381	4.3993	4.3827	4.3868	4.3736	4.4097	4.4709	4.4393	4.4383	4.453	pos_1238	metab_1235	354.145	2.4609	pos	-	-	-	-	-	0.0353858
metab_1236	-	-	-	3.7376	3.7958	3.5786	3.2403	3.7303	3.615	3.5987	3.6461	3.8097	3.7862	3.6162	3.9093	4.0444	3.8679	3.7459	3.9285	4.0831	4.0131	3.8983	3.9184	4.0937	3.9912	3.9794	4.019	3.8137	3.7778	3.7993	3.8257	pos_1239	metab_1236	397.27	2.4609	pos	-	-	-	-	-	0.0470564
metab_1237	-	-	-	3.4202	3.7245	3.5479	3.0657	3.6069	3.1108	3.4115	3.5566	3.0457	3.54	3.4421	3.9532	4.0786	4.0855	4.0858	4.0658	4.0273	4.1532	3.9593	3.9922	3.9284	3.9553	3.991	4.0832	3.8043	3.8013	3.786	3.7886	pos_1240	metab_1237	430.233	2.4609	pos	-	-	-	-	-	0.0209612
metab_1238	-	-	-	4.6636	4.8004	4.6018	4.5467	4.8557	4.7651	4.9299	4.5624	4.8353	4.892	4.6374	5.1494	5.1167	5.1188	4.999	5.0663	5.0247	5.021	4.9274	5.0323	5.0287	5.0681	5.18	5.0053	4.9254	4.9257	4.928	4.9298	pos_1241	metab_1238	234.149	2.4609	pos	-	-	-	-	-	0.00475476
metab_1239	-	-	-	4.9011	5.1039	5.0767	4.15	4.6391	4.5698	4.6146	4.7692	4.525	4.7456	4.7869	4.2849	4.5034	4.3866	4.3056	4.469	4.3916	4.9419	4.8272	4.9588	5.0598	4.945	4.9554	4.8409	4.7678	4.7626	4.7642	4.7625	pos_1242	metab_1239	372.228	2.3723	pos	-	-	-	-	-	0.0056996
metab_1240	-	-	-	3.4251	3.6027	3.437	3.1174	3.646	3.6621	3.5379	3.6488	3.6236	3.6622	3.6614	3.9093	3.9329	3.7848	3.8515	3.8237	3.992	3.8579	3.8657	3.72	3.7996	3.7319	3.8914	3.728	3.7606	3.7613	3.7698	3.7715	pos_1243	metab_1240	307.111	2.4822	pos	-	-	-	-	-	0.0129927
metab_1241	-	-	-	3.7335	3.6069	3.5457	3.637	3.3678	3.3518	3.4147	3.5591	3.3859	3.6536	3.4691	3.853	3.9995	3.8303	3.8452	3.8641	3.9733	4.1022	3.9969	3.674	4.0654	4.0043	3.9353	3.9433	3.7095	3.8142	3.7158	3.7549	pos_1244	metab_1241	415.197	2.4822	pos	-	-	-	-	-	0.114067
metab_1242	-	-	-	3.9778	4.0937	3.9419	3.6318	4.0093	3.8586	4.0198	3.9335	4.0632	3.9679	3.982	4.4025	4.3332	4.2509	4.2869	4.1074	4.298	4.153	4.3816	4.175	4.2599	4.3045	4.361	4.2444	4.144	4.132	4.1384	4.1533	pos_1245	metab_1242	212.107	2.5045	pos	-	-	-	-	-	0.0208432
metab_1243	-	-	-	3.2382	3.3934	1.2174	3.8406	5.5139	6.3173	5.8645	5.1449	4.8265	5.5068	6.2112	4.7296	5.2921	5.1842	5.2384	4.7087	5.3246	4.9192	4.5863	5.1497	4.2702	3.6737	4.8093	4.4054	5.4112	5.4114	5.4058	5.4057	pos_1246	metab_1243	578.28	2.4822	pos	-	-	-	-	-	0.00738296
metab_1244	-	-	-	5.0754	5.1359	5.0491	4.7234	5.1132	5.0561	5.0642	5.1208	5.1112	5.1611	5.1001	5.6386	5.5699	5.4926	5.5301	5.2998	5.4863	5.3585	5.5566	5.4041	5.4412	5.4981	5.6163	5.4866	5.3109	5.3111	5.3142	5.3208	pos_1247	metab_1244	301.155	2.5045	pos	-	-	-	-	-	0.0106974
metab_1245	-	-	-	4.2798	4.3377	4.2176	4.0752	4.3069	4.1002	4.3459	4.1847	4.2962	4.299	4.2988	4.2445	4.3649	4.1211	4.2798	4.1847	4.2871	4.2709	4.3336	4.1501	4.3214	4.2838	4.1752	4.2784	4.2046	4.2156	4.2076	4.2294	pos_1248	metab_1245	313.176	2.5045	pos	-	-	-	-	-	0.0256959
metab_1246	-	-	-	4.245	4.3802	4.2749	3.7611	4.2093	4.0714	4.0676	4.159	4.249	4.1682	4.2171	4.1234	4.2519	4.1965	4.1406	4.2778	4.1091	4.4036	4.2383	4.3131	4.3532	4.2291	4.3583	4.4171	4.2331	4.1637	4.1646	4.1824	pos_1249	metab_1246	364.212	2.5045	pos	-	-	-	-	-	0.077208
metab_1247	-	-	-	4.381	4.4732	4.2574	4.0293	4.4723	4.3927	4.2085	4.3494	4.3192	4.4647	4.3713	4.1217	4.1547	4.1255	4.1364	4.0946	4.194	4.1363	4.0075	4.1309	4.2078	4.1222	4.1436	4.127	4.2531	4.2091	4.2342	4.2251	pos_1250	metab_1247	313.118	2.5045	pos	-	-	-	-	-	0.0423469
metab_1248	-	-	-	4.5614	4.5516	4.461	4.2619	4.5478	4.5188	4.5789	4.4146	4.6944	4.6153	4.4502	4.5718	4.4885	4.4711	4.4789	4.4613	4.5414	4.4906	4.6424	4.4402	4.5633	4.5078	4.4859	4.5183	4.5301	4.5304	4.5354	4.5514	pos_1251	metab_1248	211.133	2.5263	pos	-	-	-	-	-	0.0232815
metab_1249	-	-	-	4.5193	4.5844	4.4815	4.1657	4.5312	4.4671	4.5943	4.5457	4.6336	4.5675	4.5525	5.0255	4.9424	4.865	4.9114	4.6901	4.8744	4.766	4.9648	4.8114	4.8399	4.9024	4.9915	4.8741	4.7152	4.7246	4.7274	4.7291	pos_1252	metab_1249	255.149	2.5263	pos	-	-	-	-	-	0.014184
metab_1250	-	-	-	4.501	4.4913	4.3919	4.1602	4.3656	4.3049	4.2761	4.2236	4.465	4.3213	4.3476	4.6699	4.8618	4.7912	4.847	4.7896	4.7847	4.5579	4.4807	4.5583	4.6852	4.5893	4.6561	4.6703	4.544	4.5442	4.5436	4.5274	pos_1253	metab_1250	294.181	2.5263	pos	-	-	-	-	-	0.0189126
metab_1251	-	-	-	4.1401	3.983	4.005	3.9936	3.9896	4.0019	4.1198	3.9416	4.1054	4.107	4.0793	4.2228	4.1934	4.4028	4.3537	4.4178	4.5499	4.1023	4.2321	4.1092	4.2095	4.2008	4.1575	4.1175	4.1005	4.0977	4.1071	4.1238	pos_1254	metab_1251	280.118	2.5263	pos	-	-	-	-	-	0.027195
metab_1252	-	-	-	4.5466	4.575	4.4196	4.016	4.1556	4.0942	4.1743	4.202	4.1811	4.2914	4.1924	4.4156	4.4528	4.4036	4.4112	4.4987	4.492	4.497	4.4257	4.4325	4.5574	4.4882	4.4805	4.4446	4.3644	4.374	4.3848	4.3683	pos_1255	metab_1252	338.218	2.5263	pos	-	-	-	-	-	0.0205951
metab_1253	-	-	-	3.4747	3.6043	3.2958	2.9698	3.3114	3.0885	3.2037	3.4471	3.6348	3.5318	3.2049	3.4624	3.3546	3.4312	3.3979	3.2057	3.3664	3.4876	3.383	3.499	3.6285	3.2464	3.5155	3.518	3.4074	3.4481	3.4478	3.4492	pos_1256	metab_1253	258.17	2.5263	pos	-	-	-	-	-	0.0461151
metab_1254	-	-	-	4.3951	4.3294	4.1598	4.2655	4.7737	4.6593	4.3303	4.6508	4.8073	4.7151	4.7925	3.9647	4.1095	3.8569	4.0172	3.9173	4.7948	4.3249	4.2261	4.1178	4.3602	4.3979	4.4178	4.3456	4.3676	4.3786	4.3783	4.3473	pos_1257	metab_1254	586.313	2.5263	pos	-	-	-	-	-	0.0333973
metab_1255	-	-	-	3.3823	3.2446	3.1049	2.9755	3.2227	3.1575	2.9732	3.2231	3.1388	3.3749	1.9964	3.1355	2.9695	2.9748	2.8672	2.9065	3.0883	2.9328	2.8009	2.7922	2.8908	2.6217	2.8067	2.9193	2.984	2.9843	3.0048	2.9857	pos_1258	metab_1255	104.035	2.5487	pos	-	-	-	-	-	0.0235486
metab_1256	-	-	-	4.7619	4.8446	5.0159	4.4429	3.3617	3.7679	3.8978	3.6867	3.6317	3.9692	3.7022	3.0241	2.885	3.7164	3.2883	3.4554	3.3273	3.1846	2.9344	3.6743	3.4956	3.7123	3.0924	2.8821	4.1549	4.1818	4.1465	4.1387	pos_1259	metab_1256	539.323	2.5045	pos	-	-	-	-	-	0.0438181
metab_1257	-	-	-	3.9263	3.7025	3.8124	3.6747	4.212	4.2238	4.159	4.1201	4.3324	4.1973	4.1612	3.9166	3.9663	3.7143	3.6628	3.5447	3.3415	3.7502	3.9816	3.7039	3.6089	3.8037	3.8846	3.7723	3.975	3.9753	4.0232	3.9904	pos_1260	metab_1257	290.107	2.5487	pos	-	-	-	-	-	0.0531942
metab_1258	-	-	-	4.9978	4.5168	4.4551	4.4003	4.2149	4.3247	4.4895	4.1644	4.2524	4.394	4.3729	4.557	4.3753	4.3321	4.1777	4.5914	4.6724	4.4651	4.3313	4.4339	4.5137	4.5074	4.4436	4.5341	4.4504	4.4549	4.4792	4.4618	pos_1261	metab_1258	337.212	2.5487	pos	-	-	-	-	-	0.0294021
metab_1259	-	-	-	4.4341	4.5155	4.4483	4.0307	4.2895	4.1154	4.1964	4.327	4.2308	4.3624	4.4681	4.1571	4.1151	4.2044	4.138	4.2485	4.2919	4.2646	4.0937	4.2169	4.5255	4.5123	4.2933	4.2683	4.2386	4.2318	4.2457	4.2476	pos_1262	metab_1259	401.238	2.5487	pos	-	-	-	-	-	0.016576
metab_1260	-	-	-	4.5895	4.6312	4.4137	4.1443	4.4526	4.3744	4.4213	4.4112	4.548	4.6107	4.481	4.2527	4.2618	4.2209	4.2526	4.4492	4.3364	4.2283	4.2059	4.3067	4.4009	4.3717	4.2729	4.1914	4.3886	4.3892	4.4374	4.3904	pos_1263	metab_1260	464.276	2.5487	pos	-	-	-	-	-	0.0568245
metab_1261	-	-	-	4.3278	4.2593	4.1616	3.6443	4.2809	4.1189	3.5747	4.2148	4.191	4.396	4.2622	3.4617	3.7279	2.4306	3.5499	3.2275	4.4053	3.3863	3.1285	3.0559	4.039	4.0508	3.2383	3.3433	3.9556	3.953	3.9694	3.9549	pos_1264	metab_1261	568.302	2.5487	pos	-	-	-	-	-	0.0174237
metab_1262	-	-	-	4.5153	3.8325	3.6022	3.7121	5.6857	5.5869	5.5514	5.638	5.6815	5.6126	5.6939	5.4016	5.5416	5.681	5.6268	5.6793	5.4906	4.9189	4.7204	4.9709	2.6832	2.925	4.961	4.9194	5.3441	5.3444	5.3421	5.2847	pos_1265	metab_1262	600.292	2.5487	pos	-	-	-	-	-	0.0655126
metab_1263	-	-	-	4.0318	4.2428	4.1183	3.9508	4.044	3.9161	4.2051	3.9681	4.1633	4.0788	4.0642	4.2781	4.28	4.1828	4.1593	4.2273	4.3368	4.2344	4.1733	4.2064	4.2471	4.2046	4.1997	4.2008	4.157	4.1516	4.1763	4.1529	pos_1266	metab_1263	246.145	2.5705	pos	-	-	-	-	-	0.0266344
metab_1264	-	-	-	4.2371	4.0503	4.1688	4.0812	3.9701	4.0565	4.0091	3.8658	4.1439	4.1583	4.2825	4.1069	3.8595	4.1773	3.978	4.1973	4.2667	3.7336	4.1432	4.2913	4.0587	4.4184	4.1807	4.4618	4.0602	4.1721	4.1711	4.1596	pos_1267	metab_1264	353.19	2.5705	pos	-	-	-	-	-	0.116755
metab_1265	-	-	-	3.9925	3.929	3.8727	3.7835	3.7154	3.6517	3.7253	3.773	3.8063	3.8547	3.8085	4.1594	4.1204	4.1029	3.9696	4.1262	4.1141	4.0934	4.1559	4.0865	4.1256	4.2353	4.1277	4.1995	3.9451	3.9464	3.9449	4.0076	pos_1268	metab_1265	202.123	2.5705	pos	-	-	-	-	-	0.0741142
metab_1266	-	-	-	3.5638	3.5409	3.4504	3.484	4.7191	4.0395	4.6198	3.3217	3.7095	4.7701	3.2284	3.8981	4.4252	4.2833	4.3746	4.4426	4.5996	3.7879	3.9063	3.9257	4.2529	4.0366	4.3393	3.9997	4.1401	4.1404	4.2053	4.1556	pos_1269	metab_1266	488.239	2.5705	pos	-	-	-	-	-	0.0731179
metab_1267	-	-	-	3.8054	4.1295	4.2869	3.7128	4.8541	4.2991	4.7874	3.461	3.8225	4.8794	3.4381	4.1289	4.6725	4.5241	4.5675	4.6504	4.7682	3.7823	3.8544	3.9929	4.3375	4.1801	4.4657	4.0668	4.3849	4.3537	4.366	4.3261	pos_1270	metab_1267	458.228	2.5705	pos	-	-	-	-	-	0.0563885
Coronafacic acid	C15765	-	C12H16O3	3.9619	3.9781	3.9469	3.7129	4.4027	4.5154	4.0479	4.3241	4.6295	4.1027	4.1754	4.3149	4.1441	4.1591	4.3103	4.1234	4.1601	3.9506	4.1868	3.9372	3.9164	3.9308	4.2432	3.9816	4.164	4.1643	4.1643	4.1762	pos_1271	metab_1268	209.117	2.5927	pos	M+H-H2O, M+H	50.9	-	0.351578	-	0.0139312
metab_1269	-	-	-	3.9661	4.0545	4.1683	3.9856	3.8874	3.9686	3.7605	3.8137	4.2076	4.0407	3.6549	3.0668	3.1829	3.4901	2.9186	2.9158	3.3653	3.0762	4.0083	3.7625	3.7363	3.8169	3.7116	3.8658	3.8717	3.8601	3.8678	3.8815	pos_1272	metab_1269	314.104	2.5927	pos	-	-	-	-	-	0.0205194
metab_1270	-	-	-	4.7471	4.71	4.3823	4.25	4.727	4.666	4.662	4.4683	4.8343	4.7122	4.6307	5.0568	4.8501	4.9529	5.0106	4.7029	4.8437	5.0079	5.0276	5.0294	5.125	5.0188	5.2231	5.0672	4.8567	4.857	4.8566	4.8688	pos_1273	metab_1270	273.123	2.5927	pos	-	-	-	-	-	0.0139513
metab_1271	-	-	-	3.8196	3.612	3.44	3.6588	4.0202	4.0851	3.98	3.9783	4.3587	3.7987	3.9245	4.5339	4.3922	4.3985	4.4556	4.4261	4.298	4.266	4.4668	4.2783	4.321	4.2921	4.4934	4.3721	4.2098	4.1969	4.2148	4.2169	pos_1274	metab_1271	170.096	2.6149	pos	-	-	-	-	-	0.0204809
metab_1272	-	-	-	5.1126	4.9368	4.7874	4.7649	6.0045	5.9245	5.987	5.8581	6.0616	6.0562	6.0283	5.7312	5.8475	5.9329	5.9528	6.0013	5.812	5.9791	5.8282	5.9399	4.5221	4.2999	5.9965	6.0535	5.8177	5.8181	5.8254	5.8275	pos_1275	metab_1272	292.202	2.6149	pos	-	-	-	-	-	0.0115562
metab_1273	-	-	-	4.667	4.5234	4.4326	4.3146	4.5439	4.4133	4.4461	4.3152	4.5728	4.6729	4.4688	5.4049	5.4057	5.3421	5.3938	5.458	5.2009	5.3336	5.3772	5.3218	5.4139	5.3452	5.4327	5.4543	5.0913	5.1181	5.1243	5.126	pos_1276	metab_1273	322.158	2.6149	pos	-	-	-	-	-	0.0364713
metab_1274	-	-	-	4.8116	4.6846	4.5354	4.3927	4.6948	4.654	4.6586	4.4802	4.7705	4.7526	4.7414	5.7532	5.7396	5.6937	5.711	5.7778	5.5886	5.6728	5.7026	5.6539	5.7418	5.7112	5.7608	5.757	5.4206	5.4289	5.4259	5.4303	pos_1277	metab_1274	368.164	2.6149	pos	-	-	-	-	-	0.00993306
metab_1275	-	-	-	3.7638	3.8203	3.5846	3.5223	3.7956	3.2465	3.8904	3.668	3.6602	3.9532	3.5742	4.2158	3.9984	4.0684	4.0725	4.278	4.3128	4.183	4.2893	4.2244	5.1054	4.5012	4.3033	4.1844	4.0021	4.0186	4.012	3.9929	pos_1278	metab_1275	443.217	2.6149	pos	-	-	-	-	-	0.0258803
metab_1276	-	-	-	4.3969	4.4644	4.0544	4.0528	4.1373	4.2866	4.2591	3.8945	4.2372	4.4605	4.0236	2.7168	2.4363	3.0013	3.1105	3.1038	3.3413	3.2933	2.9278	2.8817	3.2906	3.1543	2.4537	2.9976	3.8393	3.7507	3.7964	3.7865	pos_1279	metab_1276	487.313	2.6149	pos	-	-	-	-	-	0.0844277
metab_1277	-	-	-	4.6358	4.4349	4.1932	4.2981	5.3963	5.2426	5.4727	5.3903	5.348	5.3132	5.1585	5.5105	5.6392	5.7085	5.7457	5.7716	5.3327	5.7668	5.3615	5.7486	4.334	4.2367	5.7754	5.8233	5.4053	5.4143	5.4133	5.4125	pos_1280	metab_1277	468.249	2.6149	pos	-	-	-	-	-	0.00940249
metab_1278	-	-	-	2.9027	3.2375	1.6246	2.3273	0.9283	2.6391	2.3712	3.1793	3.1664	2.865	2.5208	4.62	4.6661	4.5797	4.6214	4.7454	4.318	4.7143	4.4765	4.5157	4.56	4.4836	4.6611	4.6936	4.2155	4.2365	4.213	4.215	pos_1281	metab_1278	455.229	2.6149	pos	-	-	-	-	-	0.0258328
metab_1279	-	-	-	4.5643	4.8207	4.5638	4.1997	4.433	4.3166	4.4804	4.3873	4.4635	4.5482	4.4185	4.7065	4.7672	4.7242	4.7325	4.7297	4.7613	4.7317	4.6792	4.6584	4.8026	4.7325	4.728	4.749	4.6133	4.6135	4.6261	4.6154	pos_1282	metab_1279	285.16	2.6367	pos	-	-	-	-	-	0.0140975
metab_1280	-	-	-	3.9263	4.142	3.6887	3.5292	4.2974	4.1799	3.8495	4.5075	4.2555	4.399	4.3763	4.7646	4.6396	4.556	4.657	4.5208	4.2815	4.8617	4.3338	5.0147	4.4435	4.0894	5.0485	5.0848	4.4396	4.4783	4.4761	4.4796	pos_1283	metab_1280	329.148	2.6367	pos	-	-	-	-	-	0.0433436
metab_1281	-	-	-	4.7164	4.7791	4.6913	4.4198	4.8113	4.6526	4.2819	4.5566	4.5026	4.7769	4.6994	4.9906	5.0271	4.9093	4.9848	5.064	5.0154	4.9721	4.8069	4.8432	4.928	4.9077	4.9321	4.9523	4.8911	4.8908	4.8893	4.8899	pos_1284	metab_1281	375.192	2.6367	pos	-	-	-	-	-	0.00189346
metab_1282	-	-	-	3.8551	3.8352	3.9132	3.4892	3.9207	3.9017	4.4697	3.8164	3.8363	3.9367	3.9172	2.8986	2.9135	3.182	2.9083	3.4669	3.092	2.9652	3.6702	3.1594	3.2252	3.8531	3.0412	3.4778	3.7291	3.7047	3.7472	3.7718	pos_1285	metab_1282	401.121	2.6367	pos	-	-	-	-	-	0.0653518
metab_1283	-	-	-	5.2693	5.3294	5.1293	5.0348	5.1915	5.0932	5.0394	5.1311	5.1703	5.326	5.1636	4.782	4.9076	4.7837	4.8371	4.8737	4.8753	4.951	4.8184	4.8026	5.048	4.9266	4.8855	4.954	5.0513	5.028	5.0373	5.0334	pos_1286	metab_1283	498.281	2.6367	pos	-	-	-	-	-	0.023104
metab_1284	-	-	-	4.0095	4.4275	4.4449	4.1519	4.3106	4.2028	4.26	4.1138	3.6681	4.3027	4.1611	3.7839	3.9348	3.8166	3.7517	3.7852	3.7427	3.8573	3.6528	3.7329	4.0092	4.0118	3.8575	3.8005	4.0543	4.072	4.0541	4.0559	pos_1287	metab_1284	275.055	2.6367	pos	-	-	-	-	-	0.0201658
metab_1285	-	-	-	4.0229	4.241	4.4758	3.8283	4.2868	4.1567	4.3278	4.0398	4.4467	4.1296	4.2348	4.8641	4.1755	4.3115	4.1966	4.257	4.328	4.1978	4.9491	5.1317	4.2141	4.416	4.1926	5.3287	4.512	4.5284	4.5337	4.5357	pos_1288	metab_1285	188.107	2.6589	pos	-	-	-	-	-	0.0244549
metab_1286	-	-	-	4.8603	4.8487	4.781	4.4902	4.7807	4.6519	4.689	4.7154	4.8621	4.8153	4.7563	4.9744	5.0081	4.9592	4.9804	4.978	5.0214	4.9766	4.9966	5.0034	5.0256	4.985	5.0193	5.0599	4.8806	4.8901	4.8898	4.8894	pos_1289	metab_1286	333.181	2.6589	pos	-	-	-	-	-	0.0104886
metab_1287	-	-	-	4.4991	4.1478	3.9709	3.8172	3.8058	4.0305	3.5815	3.8625	3.8746	4.2918	3.9587	3.7724	3.9383	3.9184	3.9717	3.926	3.7837	4.0578	3.9193	3.9616	4.0669	4.0327	3.9478	3.8298	3.979	3.9959	3.9981	3.9778	pos_1290	metab_1287	345.181	2.6589	pos	-	-	-	-	-	0.0248231
metab_1288	-	-	-	4.7047	4.725	4.6229	4.2487	4.5095	4.4009	4.5187	4.4711	4.5534	4.6396	4.5265	4.8637	4.8009	4.8087	4.7921	4.8336	4.8982	4.9035	4.8736	4.8932	4.9657	4.8914	4.8818	4.9222	4.7389	4.739	4.7502	4.7432	pos_1291	metab_1288	366.239	2.6589	pos	-	-	-	-	-	0.0122987
metab_1289	-	-	-	4.5444	4.5637	4.3937	4.2458	4.4686	4.3093	4.3706	4.3331	4.5746	4.6897	4.4232	3.7858	3.5717	3.8022	3.7979	3.9034	3.9449	4.0487	3.8239	3.9818	4.1258	3.9562	4.0219	4.1288	4.2837	4.2895	4.3051	4.2749	pos_1292	metab_1289	409.27	2.6589	pos	-	-	-	-	-	0.0294496
metab_1290	-	-	-	4.6621	4.9013	4.7626	4.6868	4.8393	4.6757	4.9582	4.8216	4.9015	4.91	4.9021	4.5791	4.6264	4.5092	4.6176	4.6294	4.7343	4.7021	4.6205	4.6013	4.6852	4.6421	4.5776	4.6458	4.7357	4.7485	4.7415	4.7375	pos_1293	metab_1290	433.278	2.6589	pos	-	-	-	-	-	0.0131257
metab_1291	-	-	-	4.5744	4.5476	4.3796	4.2846	3.2032	3.0673	3.2049	3.5341	3.47	2.5004	3.4094	3.6442	3.9014	3.9993	4.1162	4.1557	3.685	3.9823	2.9711	3.9708	2.5393	2.7503	3.8162	3.8183	3.8698	3.87	3.86	3.8319	pos_1294	metab_1291	518.265	2.6589	pos	-	-	-	-	-	0.0406618
metab_1292	-	-	-	3.4914	3.7966	3.9785	3.5313	3.4745	4.0946	4.0192	3.6721	3.7518	3.5474	3.4264	3.59	3.5963	3.5885	3.587	3.6232	3.5057	3.5413	3.4699	3.5824	3.6936	3.5805	3.6572	3.6827	3.7081	3.709	3.7188	3.7397	pos_1295	metab_1292	219.065	2.6812	pos	-	-	-	-	-	0.0341893
metab_1293	-	-	-	4.4613	4.4922	4.4229	4.112	4.4026	4.278	4.4368	4.1806	4.4032	4.4082	4.3116	4.4802	4.4799	4.4567	4.4559	4.4749	4.5793	4.4948	4.4374	4.4097	4.6039	4.4753	4.483	4.4474	4.4115	4.422	4.4181	4.4247	pos_1296	metab_1293	251.175	2.6812	pos	-	-	-	-	-	0.013152
metab_1294	-	-	-	3.9472	4.0908	3.8063	3.83	3.9648	3.7547	3.187	3.6402	3.8766	3.9059	3.7787	4.0975	4.1311	4.0772	4.0405	4.1509	4.0309	4.2095	4.3914	3.9561	4.2216	4.1233	4.1466	4.0704	3.9292	3.9608	3.8822	3.9464	pos_1297	metab_1294	426.202	2.6589	pos	-	-	-	-	-	0.0767641
metab_1295	-	-	-	4.0176	4.1678	4.1223	3.3819	3.9145	3.6736	3.7963	3.8387	3.8438	3.9354	3.9342	4.616	4.5685	4.5436	4.5474	4.6408	4.4461	4.458	4.5775	4.5112	4.5777	4.5572	4.5861	4.5849	4.3344	4.3424	4.3285	4.3384	pos_1298	metab_1295	336.192	2.6812	pos	-	-	-	-	-	0.0136355
metab_1296	-	-	-	3.919	4.1619	4.0358	3.6229	3.8324	3.5307	3.4189	3.6518	3.8162	3.7189	3.9577	3.859	3.9625	3.7951	3.8537	3.7422	3.6816	3.8793	3.8207	3.8211	4.375	4.1544	3.8146	3.7496	3.737	3.737	3.688	3.7264	pos_1299	metab_1296	453.201	2.6812	pos	-	-	-	-	-	0.0523688
metab_1297	-	-	-	4.5353	4.9453	4.7187	4.1712	3.9944	3.7097	3.5078	4.2309	2.7348	3.7575	3.9018	3.7665	3.6073	3.3079	3.94	2.5865	3.0997	4.0416	3.1648	3.2641	3.3638	2.7187	2.6078	3.2191	4.0012	3.9278	3.8872	3.8912	pos_1300	metab_1297	547.313	2.6812	pos	-	-	-	-	-	0.12656
metab_1298	-	-	-	4.7897	4.8796	4.7214	4.4432	4.7768	4.623	4.7588	4.6244	4.8165	4.8255	4.6763	4.5294	4.5603	4.5019	4.5828	4.5659	4.4819	4.6567	4.6708	4.7151	4.7498	4.67	4.669	4.6663	4.6636	4.6638	4.6649	4.6669	pos_1301	metab_1298	199.144	2.7034	pos	-	-	-	-	-	0.00353175
metab_1299	-	-	-	3.7015	3.7416	3.3998	3.12	3.6505	3.6397	3.4902	3.5756	3.6345	3.7216	3.6744	4.3925	4.3246	4.369	4.3552	4.4554	4.2431	4.4237	4.2888	4.3473	4.2621	4.173	4.394	4.4595	4.0739	4.0513	4.042	4.0438	pos_1302	metab_1299	276.087	2.7034	pos	-	-	-	-	-	0.0342496
metab_1300	-	-	-	3.9111	3.7814	3.8286	3.864	3.932	3.8996	3.9205	3.8104	3.9286	3.9898	3.9347	3.9286	3.9438	3.9052	3.9166	3.8593	3.8794	3.856	3.9888	3.8688	3.87	3.8784	3.8964	3.8819	3.8568	3.8898	3.8895	3.8913	pos_1303	metab_1300	142.123	2.7034	pos	-	-	-	-	-	0.0378027
metab_1301	-	-	-	4.2057	4.1377	4.1137	3.729	4.9185	4.7452	4.717	4.6755	4.6225	5.0349	4.9164	4.6697	4.5621	4.6432	4.6109	4.7056	4.4642	4.5647	4.5982	4.5362	4.5899	4.5803	4.6376	4.6464	4.6065	4.6134	4.6178	4.6012	pos_1304	metab_1301	537.308	2.6812	pos	-	-	-	-	-	0.0168278
metab_1302	-	-	-	3.9522	4.1346	4.0768	4.0346	4.2908	3.8361	4.1454	4.1389	3.7736	4.4376	3.9382	3.1712	3.6872	3.5954	3.6107	3.8351	3.8744	3.8746	3.3596	3.5941	4.0168	3.6382	2.8752	3.6808	3.9708	3.9613	3.9685	3.928	pos_1305	metab_1302	468.214	2.7034	pos	-	-	-	-	-	0.0447747
metab_1303	-	-	-	3.9581	3.8671	4.333	4.1874	4.4554	2.8193	2.812	4.5997	4.324	3.9241	4.2805	4.1525	4.0232	4.1405	4.0896	3.9981	4.3273	3.6329	3.9234	4.1155	3.6263	3.6736	4.1722	3.6591	4.0314	4.0771	4.0041	4.0045	pos_1306	metab_1303	535.145	2.7034	pos	-	-	-	-	-	0.0810504
metab_1304	-	-	-	4.9703	5.2957	4.6385	4.7578	4.6485	4.9192	4.2536	4.8349	4.6168	4.8296	4.9333	5.1176	4.3619	4.6069	4.6537	4.5253	4.4488	4.798	4.6023	4.8186	4.9125	5.0408	5.0366	4.9972	4.8198	4.82	4.8199	4.8032	pos_1307	metab_1304	514.324	2.7034	pos	-	-	-	-	-	0.0190355
metab_1305	-	-	-	4.7117	4.5506	4.5605	4.3575	4.5884	4.4809	4.6338	4.4957	4.7102	4.5885	4.4999	5.1398	5.0966	5.1294	5.1874	4.8224	4.6016	4.7559	4.4692	4.9256	4.8185	4.6099	5.3393	4.8375	4.7759	4.7882	4.7965	4.7953	pos_1308	metab_1305	167.07	2.7258	pos	-	-	-	-	-	0.0215876
metab_1306	-	-	-	4.4973	4.704	4.4564	4.2681	4.5381	4.5521	4.814	4.5299	4.8269	4.5445	4.6745	4.421	4.4605	4.1457	4.3679	4.4071	4.5992	4.5106	4.5582	4.5999	4.5642	4.533	4.4133	4.463	4.5369	4.5372	4.5566	4.544	pos_1309	metab_1306	245.186	2.7258	pos	-	-	-	-	-	0.021331
metab_1307	-	-	-	4.1164	4.2677	4.0607	3.9043	4.1706	4.1589	4.3306	4.1053	4.2838	4.2613	4.1879	4.4083	4.3654	4.3159	4.2922	4.2905	4.3824	4.2644	4.2906	4.3258	4.3742	4.3098	4.2939	4.3208	4.233	4.2861	4.2852	4.2873	pos_1310	metab_1307	260.161	2.7258	pos	-	-	-	-	-	0.0593683
metab_1308	-	-	-	3.7706	4.008	4.1354	3.4722	3.9628	3.989	3.896	3.9372	3.5322	3.996	3.7443	4.1816	4.0865	4.2785	4.2592	4.0071	4.042	3.7323	3.9511	3.6449	3.7765	3.7233	3.7951	3.8362	3.8885	3.9222	3.9403	3.9373	pos_1311	metab_1308	349.138	2.7258	pos	-	-	-	-	-	0.0536631
metab_1309	-	-	-	3.7931	3.7978	3.8834	2.6497	3.3958	3.3492	3.0522	3.2566	3.468	3.4496	3.4045	3.6755	3.6755	3.7579	3.7981	3.8556	3.8075	4.0934	3.831	3.9892	4.1017	4.0162	3.8604	4.0127	3.7469	3.7455	3.734	3.7527	pos_1312	metab_1309	353.243	2.7258	pos	-	-	-	-	-	0.0179116
metab_1310	-	-	-	4.5506	4.6529	4.701	4.2985	4.7355	4.6646	4.7707	4.5054	4.8077	4.6807	4.4743	4.7629	4.6026	4.6278	4.5701	4.6067	4.7194	4.6203	4.7239	4.6807	4.719	4.659	4.6836	4.6552	4.6369	4.6371	4.6395	4.6414	pos_1313	metab_1310	130.065	2.7479	pos	-	-	-	-	-	0.00489593
metab_1311	-	-	-	4.0361	3.9723	4.0314	3.7139	4.0863	4.0375	4.0365	3.9405	4.1775	4.1153	3.9014	3.8443	3.8112	3.8862	3.8143	3.7607	3.7784	3.7902	3.8155	3.7902	3.8513	3.8123	3.8469	3.792	3.9062	3.9064	3.9171	3.911	pos_1314	metab_1311	193.086	2.7479	pos	-	-	-	-	-	0.0117912
metab_1312	-	-	-	4.4537	4.6644	4.5323	4.2443	4.554	4.5035	4.6895	4.2977	4.7207	4.5579	4.3375	4.567	4.4681	4.4613	4.4378	4.416	4.6541	4.4718	4.6217	4.4645	4.6119	4.5592	4.5975	4.5046	4.4988	4.499	4.4987	4.5262	pos_1315	metab_1312	245.129	2.7479	pos	-	-	-	-	-	0.0320559
metab_1313	-	-	-	3.8836	3.6918	3.8181	3.723	3.5355	3.746	3.4588	3.5761	3.6642	3.7677	3.8125	3.9051	3.7547	3.6614	3.6217	3.5497	3.3446	3.671	3.9405	3.8722	3.8287	3.9438	2.9735	3.9245	3.7192	3.6604	3.6594	3.6618	pos_1316	metab_1313	298.212	2.7479	pos	-	-	-	-	-	0.0698634
metab_1314	-	-	-	3.9717	3.6042	3.3464	3.8207	3.4693	4.3179	4.3684	2.7369	3.1181	3.058	3.2739	4.8163	4.3165	3.9791	4.5263	4.7131	4.5677	3.4687	4.164	4.2094	4.3109	4.058	3.4471	4.4254	4.1445	4.1263	4.1444	4.1442	pos_1317	metab_1314	359.122	2.7479	pos	-	-	-	-	-	0.0205468
metab_1315	-	-	-	3.7546	4.0336	3.7241	3.5518	3.9712	3.9041	4.4547	3.6873	3.9048	4.7292	4.054	4.1294	3.8991	3.9729	3.7392	3.8259	3.893	3.8775	3.728	3.6666	4.2092	4.2349	4.1465	3.8303	3.984	3.9839	3.991	4.0061	pos_1318	metab_1315	470.226	2.7479	pos	-	-	-	-	-	0.024198
metab_1316	-	-	-	4.2271	4.108	4.118	3.9229	4.1478	4.1296	4.5228	3.9535	4.3132	4.2855	4.1234	4.1146	4.0484	4.1621	4.1432	3.99	4.0145	3.9434	3.8723	3.9604	4.0763	3.9758	4.1541	4.0858	4.133	4.1328	4.1453	4.1423	pos_1319	metab_1316	179.107	2.7701	pos	-	-	-	-	-	0.0148256
metab_1317	-	-	-	3.609	3.3169	3.0236	2.9067	3.6119	2.9614	3.0297	3.1955	3.3894	3.6799	2.947	3.7163	3.7903	3.9346	3.9682	3.6955	3.7611	4.1365	3.9311	4.1078	4.0211	3.8761	4.2103	4.1243	3.7376	3.7518	3.7513	3.7511	pos_1320	metab_1317	359.172	2.7479	pos	-	-	-	-	-	0.0157106
metab_1318	-	-	-	4.6413	4.8335	4.9318	4.3947	4.9345	4.8807	4.9821	4.627	5.0007	4.9002	4.4209	4.7543	4.5188	4.69	4.5067	4.4476	4.7004	4.5199	4.7294	4.6469	4.6023	4.5653	4.6477	4.6483	4.7236	4.7238	4.7235	4.735	pos_1321	metab_1318	291.134	2.7479	pos	-	-	-	-	-	0.013209
metab_1319	-	-	-	3.9713	3.9525	3.8453	3.6552	3.9554	3.8065	3.9241	3.6639	3.9334	3.8757	3.8073	4.0082	3.9178	4.1163	4.0287	4.0243	4.078	3.9154	3.7879	3.8189	4.0122	3.9279	3.9233	3.8879	3.9138	3.9142	3.9424	3.9195	pos_1322	metab_1319	191.143	2.7923	pos	-	-	-	-	-	0.0316318
metab_1320	-	-	-	4.1653	4.2448	4.0586	3.8914	4.2714	4.2305	4.3107	4.036	4.3854	4.2916	4.1764	4.378	4.3637	4.3136	4.3208	4.3044	4.3169	4.3991	4.411	4.4991	4.4929	4.3879	4.6137	4.4083	4.3027	4.303	4.3116	4.3111	pos_1323	metab_1320	271.108	2.7923	pos	-	-	-	-	-	0.0112615
metab_1321	-	-	-	3.6272	3.3969	3.4239	3.0975	3.567	3.5081	2.9176	3.3629	3.4002	3.5021	3.3053	4.0294	4.1324	4.1136	4.2026	4.1099	3.7246	3.9288	3.5081	4.0175	3.8734	3.6308	4.0222	4.1126	3.7718	3.7939	3.7848	3.8156	pos_1324	metab_1321	325.107	2.7923	pos	-	-	-	-	-	0.0427361
metab_1322	-	-	-	4.1605	4.5197	4.4269	4.0393	4.2702	4.3391	4.3964	4.2775	4.3358	4.4847	4.3602	4.4949	4.4614	4.4526	4.4871	4.4842	4.5082	4.5347	4.4233	4.5053	4.3042	4.2175	4.5426	4.5544	4.4076	4.3897	4.4015	4.4092	pos_1325	metab_1322	350.207	2.7923	pos	-	-	-	-	-	0.0202085
metab_1323	-	-	-	3.4582	3.3457	3.3933	2.8659	3.3987	3.2674	3.3353	3.2509	3.418	3.4747	3.4958	4.186	4.306	4.2286	4.2741	4.1884	4.2018	3.8711	3.8777	3.8144	3.8709	3.847	3.8813	3.7919	3.7025	3.7027	3.7023	3.7485	pos_1326	metab_1323	339.095	2.7923	pos	-	-	-	-	-	0.0543321
metab_1324	-	-	-	4.1705	4.3082	4.0722	3.6321	4.1453	3.9381	3.9675	4.0194	3.9317	4.1532	4.1166	4.4388	4.4165	4.4392	4.4342	4.4659	4.3902	4.3879	4.326	4.2955	4.4631	4.3176	4.401	4.4167	4.2595	4.2961	4.3011	4.3031	pos_1327	metab_1324	386.171	2.7923	pos	-	-	-	-	-	0.0461526
metab_1325	-	-	-	3.1822	3.2135	3.2474	2.7628	3.8443	3.7919	3.7512	3.6804	3.7961	3.8919	3.9175	3.8936	3.8929	4.0081	4.0616	4.0034	3.895	3.9884	3.8165	3.9124	3.6376	3.5983	4.1108	4.0491	3.7791	3.7277	3.7906	3.7926	pos_1328	metab_1325	452.254	2.7923	pos	-	-	-	-	-	0.067929
metab_1326	-	-	-	3.8181	4.6155	4.0901	3.4704	4.5671	4.3617	2.5579	3.7818	2.8434	5.4466	3.6908	5.1061	4.9774	4.9477	4.6152	3.8095	5.0166	3.8138	2.4718	3.4721	4.1484	3.8951	3.7081	3.4543	4.4086	4.399	4.4088	4.3806	pos_1329	metab_1326	585.292	2.7923	pos	-	-	-	-	-	0.0301675
metab_1327	-	-	-	3.4228	3.6498	3.1396	2.6101	3.9346	3.8759	3.7597	3.8426	3.8578	3.9771	3.8985	3.7488	3.8774	3.9814	3.7391	3.8558	3.8614	3.9435	3.6801	3.8304	3.7659	3.5753	3.8271	3.9092	3.7618	3.7452	3.7364	3.7385	pos_1330	metab_1327	505.281	2.7923	pos	-	-	-	-	-	0.0266886
N-Acetylcystathionine	-	HMDB0002381	C9H16N2O5S	4.3491	4.6959	4.4391	4.3782	4.3777	4.3439	4.2852	4.189	3.6119	4.5025	4.2856	3.5701	3.6721	3.7226	3.6381	3.6313	3.4673	3.7786	3.4392	3.8031	3.8544	3.472	3.7495	3.8841	4.1632	4.1609	4.1712	4.1896	pos_1331	metab_1328	297.112	2.8146	pos	M+H, M+CH3OH+H	-	56.9	2.8815	20619-80-1	0.0303048
metab_1329	-	-	-	4.5288	4.68	4.515	4.3923	4.5201	4.396	4.376	4.3219	4.3255	4.6036	4.39	3.9757	4.1266	4.1388	4.1322	4.1044	4.0099	4.1238	4.0642	4.1663	4.2025	4.1422	4.1168	4.233	4.3043	4.3343	4.3395	4.3292	pos_1332	metab_1329	323.091	2.8146	pos	-	-	-	-	-	0.0353952
metab_1330	-	-	-	4.3307	4.3821	4.2249	4.0166	4.3269	4.1883	4.2603	4.1766	4.4673	4.3944	4.2133	3.9193	3.9879	3.8615	4.0437	4.0315	4.092	4.2383	4.1728	4.1744	4.3117	4.1187	4.2823	4.3004	4.2088	4.2026	4.2044	4.204	pos_1333	metab_1330	391.259	2.8146	pos	-	-	-	-	-	0.006146
metab_1331	-	-	-	3.4186	4.5076	4.6303	3.0686	3.4428	3.3579	3.0907	3.7978	3.8411	4.0965	3.2592	4.2403	4.1659	4.2021	4.0757	4.0924	4.0063	4.1092	3.7806	4.0191	2.6986	2.6929	3.9553	4.0832	3.8441	3.8508	3.8502	3.7908	pos_1334	metab_1331	540.271	2.8146	pos	-	-	-	-	-	0.0644363
metab_1332	-	-	-	5.3608	5.4263	5.2438	5.01	5.323	5.2191	5.2273	5.162	5.3086	5.3654	5.2556	5.3023	5.3185	5.2957	5.2977	5.3417	5.3389	5.3717	5.2922	5.2996	5.4486	5.3234	5.3348	5.4153	5.2853	5.2738	5.288	5.2899	pos_1335	metab_1332	421.306	2.8146	pos	-	-	-	-	-	0.016537
metab_1333	-	-	-	3.8242	3.6052	3.565	3.4078	3.7529	3.7578	3.5437	3.6011	3.8575	3.786	3.7728	4.6885	4.4457	4.4005	4.3287	4.2259	4.1697	4.0036	3.8652	4.0636	3.9674	3.516	4.1425	4.1843	4.0009	3.993	3.9926	4.0156	pos_1336	metab_1333	355.118	2.8146	pos	-	-	-	-	-	0.0249392
metab_1334	-	-	-	3.799	3.6827	3.8159	3.4929	3.6577	3.624	3.7032	3.6678	3.7965	3.6056	3.6452	3.911	3.9058	3.72	3.8331	3.805	3.8243	3.9252	3.9004	3.8389	3.939	3.8826	3.8755	3.9459	3.7758	3.7681	3.7973	3.7675	pos_1337	metab_1334	308.14	2.8367	pos	-	-	-	-	-	0.0325707
metab_1335	-	-	-	4.3259	4.3774	4.1373	3.9831	4.4026	4.3577	4.3457	4.3178	4.4594	4.4987	4.2686	4.3851	4.3668	4.3561	4.3952	4.3051	4.3932	4.3322	4.2928	4.2728	4.356	4.2975	4.4023	4.386	4.3176	4.3178	4.3175	4.3332	pos_1338	metab_1335	274.107	2.8146	pos	-	-	-	-	-	0.0180561
metab_1336	-	-	-	3.0083	3.1537	3.3388	2.6926	3.0958	3.0974	3.1758	3.2543	3.4329	3.0951	3.3561	3.6905	3.7875	3.6954	3.6204	3.7405	3.8624	3.8438	4.7234	3.5292	4.4883	5.5447	3.8311	3.6234	4.2057	4.1947	4.2067	4.1912	pos_1339	metab_1336	423.189	2.8367	pos	-	-	-	-	-	0.0179307
metab_1337	-	-	-	3.0673	3.9219	3.5492	3.1543	3.2173	2.8055	3.4121	2.9067	3.1918	3.2884	3.6872	2.9132	3.5666	3.5058	3.6673	3.5362	2.9223	3.9625	3.4066	3.6368	4.1371	3.9109	3.7925	3.7435	3.4109	3.3551	3.3531	3.3793	pos_1340	metab_1337	513.199	2.8367	pos	-	-	-	-	-	0.0631235
metab_1338	-	-	-	4.6453	4.6742	4.5752	4.3836	4.5704	4.5015	4.6678	4.4377	4.7933	4.5967	4.5413	5.084	4.816	4.9359	4.8168	4.7624	4.945	4.674	4.8527	4.8055	4.7048	4.7243	4.7974	4.92	4.7192	4.7195	4.7214	4.733	pos_1341	metab_1338	189.124	2.8591	pos	-	-	-	-	-	0.0152749
metab_1339	-	-	-	4.0044	4.2505	4.0593	3.9394	4.1456	4.1119	4.3313	4.1844	4.4463	4.1588	4.2108	4.1445	4.1536	4.0172	4.0669	4.1504	4.2677	4.1178	4.1284	4.1567	4.2131	4.1178	4.0791	4.1346	4.1772	4.1562	4.1771	4.1762	pos_1342	metab_1339	213.16	2.8591	pos	-	-	-	-	-	0.0235399
metab_1340	-	-	-	3.8642	3.6888	3.352	3.0006	3.5739	3.2278	3.2672	3.5655	3.8488	3.4934	3.5362	4.1915	3.9245	4.3716	4.1734	4.0846	4.0774	3.6738	3.7143	3.7607	4.0664	4.0069	3.6834	3.5606	3.7956	3.8047	3.7986	3.7973	pos_1343	metab_1340	325.139	2.8591	pos	-	-	-	-	-	0.00919882
metab_1341	-	-	-	3.0982	2.7797	3.0169	1.731	3.0564	2.9354	2.7839	2.8471	3.0161	2.869	2.7586	4.051	3.9058	3.7519	3.7612	3.8311	4.0008	3.5834	3.6065	3.5814	3.5535	3.7116	3.6501	3.6221	3.4071	3.4447	3.404	3.4226	pos_1344	metab_1341	333.108	2.8591	pos	-	-	-	-	-	0.0433855
metab_1342	-	-	-	3.7303	3.0346	3.3854	2.9334	2.6679	2.606	2.869	2.9447	2.7128	3.0067	3.1631	3.6034	3.8785	3.6249	3.8574	3.6821	3.6701	3.8847	3.669	3.8219	5.3838	5.3404	3.7012	3.6808	4.2288	4.2222	4.2395	4.2354	pos_1345	metab_1342	453.2	2.8591	pos	-	-	-	-	-	0.0174654
metab_1343	-	-	-	4.4044	4.3439	4.2314	3.9386	4.1513	4.0758	4.1748	4.1698	4.2637	4.4331	4.2343	4.5814	4.4674	4.3451	4.2248	4.4349	4.6448	4.5405	4.6096	4.5804	4.719	4.5746	4.5911	4.5461	4.3699	4.363	4.3906	4.3646	pos_1346	metab_1343	596.341	2.8591	pos	-	-	-	-	-	0.0296626
Dukunolide D	-	HMDB0035732	C26H28O8	3.6001	1.9075	1.9031	1.7711	2.7002	1.8832	1.8759	3.5743	4.0432	2.5145	1.9156	4.6125	4.1364	4.878	4.5648	4.4758	4.5196	3.5878	3.7375	3.9751	3.5561	3.3704	3.7885	3.1015	3.9439	3.9442	3.9279	3.9437	pos_1347	metab_1344	491.164	2.8591	pos	M+H-2H2O, M+Na	-	67.7	-8.22973	101560-02-5	0.0183006
metab_1345	-	-	-	3.1115	3.4603	3.1941	3.4889	3.2667	3.3511	3.1721	3.2187	3.444	3.3915	3.3514	3.619	3.0381	3.289	2.8219	3.0929	3.0365	3.2018	4.1452	4.193	3.1888	3.9499	3.0171	4.6338	3.6503	3.6795	3.6499	3.6596	pos_1348	metab_1345	252.134	2.8813	pos	-	-	-	-	-	0.0322294
metab_1346	-	-	-	4.0245	4.0987	4.1364	3.7736	3.9931	3.9448	4.17	3.8985	4.1568	3.9519	4.0402	4.1869	4.2444	4.1022	4.2031	4.1349	4.356	4.2244	4.2975	4.3282	4.2568	4.1894	4.2138	4.4721	4.1914	4.1757	4.1883	4.1856	pos_1349	metab_1346	352.167	2.8813	pos	-	-	-	-	-	0.0155691
metab_1347	-	-	-	4.2581	4.0915	3.9528	3.7335	3.9286	3.7277	3.7272	3.699	4.0762	4.1265	3.8737	3.3377	3.4753	3.6391	3.6386	3.6384	3.6476	3.5506	3.7769	3.5609	3.572	3.8003	3.8244	3.4489	3.8277	3.8747	3.8823	3.8838	pos_1350	metab_1347	406.129	2.8813	pos	-	-	-	-	-	0.0594277
metab_1348	-	-	-	3.7246	3.5747	3.8672	3.7926	3.6791	3.6449	3.7331	3.4466	4.0932	3.654	3.5955	4.1127	3.8936	3.9735	3.9608	3.8264	3.8897	3.9321	4.4719	4.5634	3.9627	4.3637	4.062	4.9121	4.0748	4.0697	4.0694	4.0858	pos_1351	metab_1348	202.123	2.9034	pos	-	-	-	-	-	0.0177061
metab_1349	-	-	-	5.1651	5.042	4.5322	4.1956	4.2749	4.2527	4.5596	4.0236	4.5549	4.8318	4.3368	3.9927	3.8613	3.8631	4.0158	3.8734	4.4249	3.8497	4.252	4.0967	3.9926	4.0272	3.9751	3.8894	4.3863	4.3937	4.3933	4.39	pos_1352	metab_1349	299.175	2.9034	pos	-	-	-	-	-	0.00791871
metab_1350	-	-	-	4.7929	4.9784	4.6919	4.538	4.7861	4.7038	4.6451	4.7812	4.754	4.968	4.7639	4.2896	4.4461	4.3509	4.3407	4.44	4.4117	4.4657	4.4053	4.3896	4.4866	4.4868	4.4588	4.5056	4.6326	4.6503	4.637	4.6307	pos_1353	metab_1350	477.296	2.9034	pos	-	-	-	-	-	0.0205005
metab_1351	-	-	-	4.1558	4.1822	4.1015	3.5194	4.0111	3.9363	4.0903	3.939	4.2975	4.1548	3.8511	4.5947	4.1491	4.31	4.3957	4.6198	4.1387	4.2389	5.2575	5.2779	4.3285	5.0555	4.2504	5.6951	4.6851	4.7012	4.6885	4.6867	pos_1354	metab_1351	370.176	2.9034	pos	-	-	-	-	-	0.0170772
metab_1352	-	-	-	4.1889	4.3672	4.246	3.7927	4.2143	4.1596	4.4333	4.0154	4.4259	4.2293	4.255	3.8415	4.0378	3.587	3.8842	3.854	4.2348	3.6343	4.0502	3.8626	3.961	3.8472	3.6438	3.6243	4.0412	4.0838	4.0947	4.0966	pos_1355	metab_1352	261.144	2.9258	pos	-	-	-	-	-	0.0579806
metab_1353	-	-	-	4.7424	4.7996	4.6782	4.5387	4.7642	4.7214	4.7452	4.618	4.8101	4.8016	4.7085	4.7255	4.7171	4.6246	4.6535	4.7184	4.6853	4.6745	4.6887	4.6418	4.7039	4.7078	4.7026	4.7129	4.7044	4.7046	4.7092	4.711	pos_1356	metab_1353	287.139	2.9258	pos	-	-	-	-	-	0.00761907
metab_1354	-	-	-	3.3797	3.2328	2.6711	2.9812	3.1271	2.9598	3.0659	3.0935	3.2098	3.0078	2.9649	3.2182	2.9753	3.2775	2.8653	2.9766	3.3352	3.2671	2.949	2.8262	3.4567	3.7633	3.5672	3.1823	3.2019	3.1499	3.2236	3.2451	pos_1357	metab_1354	276.18	2.9258	pos	-	-	-	-	-	0.0919065
metab_1355	-	-	-	3.3789	2.7696	2.6644	2.2194	3.0205	2.9798	3.6623	3.19	3.2038	2.7552	3.1455	4.1867	4.4668	4.3102	4.446	4.3351	3.8877	5.0977	4.0794	4.852	4.9784	4.4994	5.066	4.7929	4.3559	4.3655	4.3627	4.367	pos_1358	metab_1355	415.137	2.9258	pos	-	-	-	-	-	0.0112781
metab_1356	-	-	-	4.2063	4.2223	3.9517	3.6826	4.1382	4.0781	3.9259	3.7341	4.0746	4.2781	3.8362	4.9042	5.0194	4.7087	4.9971	5.1612	4.65	5.2089	4.5443	5.0902	5.2646	4.8244	4.3831	4.8942	4.7078	4.6954	4.6984	4.6968	pos_1359	metab_1356	462.27	2.9258	pos	-	-	-	-	-	0.0129837
metab_1357	-	-	-	4.7881	4.662	4.6272	4.5833	4.6844	4.5665	4.4651	4.7524	4.6612	4.7291	4.7392	4.5428	4.6463	4.3796	4.4242	4.5093	4.4695	4.5896	4.4447	4.4871	4.5391	4.5754	4.5119	4.4561	4.5802	4.5919	4.587	4.5775	pos_1360	metab_1357	468.213	2.9258	pos	-	-	-	-	-	0.0150231
metab_1358	-	-	-	3.6117	3.7986	3.5565	3.3226	3.4897	3.397	3.4199	3.5422	3.5107	3.4849	3.4521	3.4068	3.3844	3.2293	3.2937	3.1835	3.4187	3.3466	3.3521	3.3152	3.3296	3.2882	3.2631	3.3252	3.4186	3.4154	3.4067	3.4203	pos_1361	metab_1358	182.154	2.9479	pos	-	-	-	-	-	0.0138031
metab_1359	-	-	-	4.3322	4.3668	4.179	3.9022	4.3044	4.2283	4.1832	4.1722	4.1857	4.3201	4.2019	4.6002	4.7056	4.574	4.6248	4.7128	4.6277	4.6486	4.5812	4.5459	4.6608	4.5714	4.6424	4.6604	4.4619	4.4594	4.4685	4.4843	pos_1362	metab_1359	352.234	2.9258	pos	-	-	-	-	-	0.0260197
metab_1360	-	-	-	3.5948	3.3054	2.9922	2.6655	2.8728	2.4201	2.4127	2.5655	3.368	3.166	2.4631	3.9495	4.0036	4.0208	3.9801	3.9661	3.2691	4.0298	3.4589	3.9091	4.0601	4.05	4.0177	3.9973	3.5564	3.6305	3.6292	3.6167	pos_1363	metab_1360	447.126	2.8813	pos	-	-	-	-	-	0.0777437
metab_1361	-	-	-	4.0938	4.1783	4.0027	3.7087	4.0436	4.0016	4.0073	4.0302	4.2111	4.0471	4.1368	4.044	4.095	3.9215	4.0041	4.0302	4.2717	3.9401	3.9867	3.9308	4.0327	4.0016	3.8654	4.0738	4.0197	4.0129	4.0128	4.0359	pos_1364	metab_1361	376.223	2.9479	pos	-	-	-	-	-	0.0253088
metab_1362	-	-	-	4.1486	3.9662	3.8754	3.4376	3.8564	3.6134	3.6134	3.8494	3.547	3.5953	3.6921	4.0371	4.0894	4.0609	4.0092	4.082	4.1319	4.1071	4.0441	4.2524	4.2062	4.0827	4.1968	4.1782	3.9039	3.9094	3.9389	3.9203	pos_1365	metab_1362	352.223	2.8591	pos	-	-	-	-	-	0.035844
metab_1363	-	-	-	2.5709	3.5259	3.1635	2.379	4.3366	4.1996	4.3876	4.4849	4.4167	4.4929	4.4529	4.6098	4.672	4.7607	4.7267	4.7487	4.7794	4.7762	4.6137	4.6827	3.2103	2.8265	4.7729	4.709	4.3976	4.3786	4.3782	4.3801	pos_1366	metab_1363	510.26	2.8367	pos	-	-	-	-	-	0.0216993
metab_1364	-	-	-	4.2969	4.5539	4.7894	4.2997	4.4017	4.8658	4.8577	4.3718	4.4599	4.3575	4.1359	4.3876	4.2522	4.3713	4.3659	4.3112	4.292	4.3282	4.1879	4.3198	4.349	4.2358	4.3624	4.3683	4.4583	4.4549	4.4622	4.464	pos_1367	metab_1364	189.091	2.9702	pos	-	-	-	-	-	0.00938128
10-oxo-5,8-decadienoic acid	-	LMFA01060085	C10H14O3	4.049	4.247	4.5109	4.1011	4.1552	4.6213	4.5722	4.1814	4.2584	4.1263	3.8875	4.0855	3.8111	4.1857	4.1694	4.1441	4.339	4.176	3.9955	4.2404	4.4568	3.8739	4.4404	3.8802	4.246	4.2462	4.2459	4.2702	pos_1368	metab_1365	165.091	2.9702	pos	M+H-H2O, M+H	63.2	-	0.58859	-	0.0282328
metab_1366	-	-	-	3.8857	4.9789	5.5252	4.8108	4.5429	5.6212	5.5683	4.9303	4.2395	3.857	3.8569	3.5176	3.7034	3.6608	3.7507	3.6822	3.4235	4.3732	3.6905	4.2276	4.3643	3.8325	4.4003	4.1644	4.9307	4.9138	4.9374	4.951	pos_1369	metab_1366	283.115	2.9702	pos	-	-	-	-	-	0.0355804
metab_1367	-	-	-	4.1824	4.1953	4.086	3.8772	4.0421	3.9525	3.9726	3.981	4.0374	4.169	4.0322	4.5445	4.403	4.3521	4.2828	4.361	4.4615	4.2282	4.2684	4.2162	4.3319	4.274	4.3111	4.2802	4.2154	4.2211	4.2288	4.2359	pos_1370	metab_1367	290.211	2.9702	pos	-	-	-	-	-	0.0206917
metab_1368	-	-	-	3.8509	3.858	3.8785	3.5753	3.7375	3.8757	3.864	3.6749	3.8249	3.6713	3.7044	4.0335	4.0603	3.9726	4.0122	4.0353	4.0623	3.9424	3.9827	3.9981	4.0622	3.989	3.9695	3.9736	3.8923	3.8689	3.9003	3.902	pos_1371	metab_1368	223.108	2.9702	pos	-	-	-	-	-	0.0346486
metab_1369	-	-	-	3.2569	3.3518	2.7908	3.1486	3.1886	2.7568	3.1255	3.2615	3.2109	2.4815	2.7782	3.0816	3.435	3.0176	3.0026	2.7781	3.1649	3.2406	3.1931	2.9278	4.7818	3.4796	3.1694	3.24	3.1367	3.0568	3.0583	3.0595	pos_1372	metab_1369	443.218	2.9702	pos	-	-	-	-	-	0.0944885
metab_1370	-	-	-	4.2408	4.1681	3.9703	3.5892	4.1891	4.0596	4.4181	4.1531	4.2299	4.2059	4.0001	4.2727	4.1248	4.4187	4.0586	4.4656	4.2529	4.6324	4.5698	4.6746	4.2477	4.0812	4.2436	4.3824	4.2231	4.2308	4.2366	4.1871	pos_1373	metab_1370	551.307	2.9702	pos	-	-	-	-	-	0.0501272
metab_1371	-	-	-	4.5393	4.4969	4.5543	4.3904	4.6753	4.6264	4.5786	4.4717	4.6518	4.6454	4.4987	4.9004	4.8276	4.829	4.894	4.8341	4.8298	4.5388	4.462	4.5918	4.5662	4.4978	4.6909	4.602	4.6299	4.6355	4.6456	4.6417	pos_1374	metab_1371	149.06	2.9924	pos	-	-	-	-	-	0.015823
metab_1372	-	-	-	4.6854	4.7474	4.679	4.5458	4.7691	4.6887	4.9128	4.6377	4.9151	4.981	4.8003	4.8997	4.7902	4.832	4.8101	4.7299	4.8154	4.7755	4.8725	4.8288	4.8191	4.8609	4.8963	4.8565	4.7822	4.7903	4.7958	4.7976	pos_1375	metab_1372	163.112	2.9924	pos	-	-	-	-	-	0.0158868
metab_1373	-	-	-	3.7772	3.8903	3.9214	3.2899	3.8529	3.685	3.5377	3.4992	3.3426	4.2315	3.7519	4.1492	4.3054	4.1585	4.188	4.2237	4.4489	4.1068	3.7946	3.4385	4.2456	4.2564	4.1174	4.0126	3.9697	3.9589	4.0179	3.9597	pos_1376	metab_1373	412.226	2.8367	pos	-	-	-	-	-	0.0664465
metab_1374	-	-	-	3.9193	3.9641	4.1699	3.319	3.3433	3.1158	2.6722	4.0148	3.6777	3.4197	3.8646	1.8017	2.1144	2.9832	3.0936	2.9832	3.0974	3.5806	3.5088	3.8396	3.0889	2.8583	2.8476	3.3064	3.5031	3.5169	3.5163	3.4562	pos_1377	metab_1374	247.165	2.9924	pos	-	-	-	-	-	0.0641642
metab_1375	-	-	-	4.2083	4.2677	4.22	4.106	4.1655	4.0497	4.1129	4.0121	3.9134	4.2627	3.9355	3.8808	3.9685	3.9062	3.9707	3.7795	3.9611	4.1118	3.9597	4.0295	4.1886	4.0555	4.076	4.0379	4.0201	4.0535	4.0307	4.0384	pos_1378	metab_1375	297.112	2.9924	pos	-	-	-	-	-	0.0324492
metab_1376	-	-	-	4.1885	4.338	4.0803	3.9284	4.1771	3.9906	3.8295	3.9539	3.992	4.2044	3.9047	3.8515	3.8935	3.2611	3.5443	3.8383	3.7577	3.9551	3.7812	3.9508	3.9246	3.8859	3.868	3.8842	3.9057	3.8965	3.8897	3.8916	pos_1379	metab_1376	353.207	2.9924	pos	-	-	-	-	-	0.0164938
metab_1377	-	-	-	4.129	4.413	3.943	3.6915	3.4021	3.2579	3.6361	3.4816	3.9085	3.4133	3.5773	3.5275	2.7489	2.5833	2.7075	3.1558	3.5258	4.1261	3.7977	3.5235	4.3002	4.1688	3.9592	4.0301	3.8185	3.8952	3.8288	3.8194	pos_1380	metab_1377	378.275	2.9924	pos	-	-	-	-	-	0.0880047
metab_1378	-	-	-	4.3867	4.308	4.4937	3.8298	4.1336	4.0395	3.8135	4.4539	4.2921	4.2467	4.2376	3.435	3.7916	3.8914	3.9492	3.8866	3.8362	4.1255	4.1418	4.3995	3.9112	3.8619	3.8906	4.0461	4.1073	4.1159	4.1033	4.1051	pos_1381	metab_1378	480.27	2.9924	pos	-	-	-	-	-	0.0129079
metab_1379	-	-	-	4.2782	4.4477	4.5405	4.0995	4.293	4.0316	4.0677	4.4045	4.3083	4.1846	4.3288	4.7955	4.8683	4.7977	4.8892	4.9329	4.8746	4.8915	4.7181	4.8732	4.7765	4.6744	4.7657	4.9182	4.6162	4.6299	4.619	4.6179	pos_1382	metab_1379	422.215	2.9924	pos	-	-	-	-	-	0.0143754
metab_1380	-	-	-	4.3088	3.89	4.0143	3.8135	4.2615	4.2097	4.1281	4.198	4.179	4.304	4.2391	4.4493	4.4115	4.3294	4.4183	4.3672	4.3676	4.3777	4.3325	4.321	4.4095	4.3476	4.443	4.3569	4.2647	4.2624	4.2858	4.264	pos_1383	metab_1380	290.113	3.0145	pos	-	-	-	-	-	0.0259299
metab_1381	-	-	-	4.4685	4.4757	4.329	4.251	4.4744	4.4271	4.4838	4.3039	4.4835	4.5084	3.8936	4.7408	4.4001	4.5988	4.3158	4.5576	4.7038	4.2992	4.2491	4.2826	4.3056	4.2628	4.3439	4.4492	4.3849	4.3869	4.3887	4.3866	pos_1384	metab_1381	245.092	3.0145	pos	-	-	-	-	-	0.00353203
metab_1382	-	-	-	3.5109	4.3303	3.6008	3.4361	3.4081	3.2101	3.5966	4.0352	4.1542	3.4323	3.5711	3.4592	3.3885	3.3881	3.4199	3.3275	3.0758	3.8399	3.6336	3.5825	3.851	3.6838	3.6365	3.3116	3.641	3.6401	3.6551	3.6416	pos_1385	metab_1382	345.202	2.9924	pos	-	-	-	-	-	0.0165232
metab_1383	-	-	-	3.9229	3.9436	3.9235	3.6626	3.6474	3.4702	3.6666	3.705	3.7212	3.7234	3.5894	3.7609	4.0576	3.8118	3.797	3.8807	3.8355	3.9881	3.6978	3.7953	4.0121	3.966	3.8418	3.723	3.7838	3.7428	3.7076	3.7657	pos_1386	metab_1383	409.233	3.0145	pos	-	-	-	-	-	0.0746362
metab_1384	-	-	-	4.432	4.417	4.2101	3.9704	4.2629	4.4166	4.4275	4.232	4.3628	4.7873	4.3372	4.8804	4.7362	4.7432	4.4964	4.4743	4.8004	4.2482	4.332	4.321	4.5118	4.4579	4.4182	4.3403	4.4497	4.441	4.4431	4.4399	pos_1387	metab_1384	477.271	3.0145	pos	-	-	-	-	-	0.0101614
metab_1385	-	-	-	3.956	3.8498	3.6569	3.3818	3.928	3.8464	3.5355	4.0353	3.8338	3.8805	4.0806	3.3877	3.4983	3.3186	3.4083	3.548	4.0723	3.7748	3.4379	3.5352	3.8195	3.6748	3.4286	3.4737	3.6085	3.45	3.6225	3.5907	pos_1388	metab_1385	469.266	3.0145	pos	-	-	-	-	-	0.167727
metab_1386	-	-	-	4.3334	4.0286	4.1622	3.8043	4.2394	4.1847	4.2054	4.0934	4.2043	4.1858	4.1429	3.8911	4.1805	4.1258	4.2967	4.3611	4.2521	4.4152	4.2217	4.3927	4.3382	4.1146	4.2978	4.3858	4.2075	4.1859	4.1749	4.1769	pos_1389	metab_1386	453.271	3.0145	pos	-	-	-	-	-	0.0348436
metab_1387	-	-	-	4.0309	3.9286	3.9924	3.2717	3.6108	3.7971	3.7575	3.5312	3.6827	3.4998	3.9066	4.4738	4.0964	4.6221	4.1443	4.0956	4.0317	3.9827	4.1562	4.3662	3.881	3.8445	3.8437	4.3214	3.9898	3.9859	4.0056	3.9857	pos_1390	metab_1387	351.153	3.0368	pos	-	-	-	-	-	0.0219193
metab_1388	-	-	-	4.416	4.4377	4.2669	3.8401	4.5251	4.3587	4.5686	4.3424	4.3039	4.577	4.2788	4.9815	5.1188	5.0112	4.8788	5.3011	5.3434	4.7262	4.835	4.811	5.2274	4.8486	5.0134	4.7876	4.7812	4.7774	4.7811	4.7619	pos_1391	metab_1388	444.213	3.0368	pos	-	-	-	-	-	0.0208887
metab_1389	-	-	-	3.6572	3.5987	3.3502	3.4602	3.4804	3.3759	3.2756	3.2279	3.3805	3.0449	3.2793	4.1174	4.1535	4.1169	4.1193	4.1429	4.0172	4.1327	3.9155	3.959	4.1204	4.2478	4.068	4.0558	3.8062	3.6407	3.8071	3.7869	pos_1392	metab_1389	507.257	3.0368	pos	-	-	-	-	-	0.168063
Rothindin	-	LMPK12050043;HMDB0036609	C22H20O10	4.1725	4.1709	4.5204	4.2739	4.2204	4.3634	4.105	4.1646	4.1472	4.1965	4.4488	3.9827	3.9273	4.0654	3.9874	3.9639	3.9572	4.0714	4.0417	3.936	4.1518	4.2024	4.0166	4.014	4.0931	4.122	4.1135	4.1237	pos_1393	metab_1390	427.102	3.0368	pos	M+H-H2O, M+H	-	80.5	-1.70999	63347-43-3	0.0319261
metab_1391	-	-	-	4.8743	4.9126	4.9942	4.5583	5.9838	5.8396	5.8247	5.8642	6.133	5.9064	5.8964	5.2078	5.0291	5.0642	5.009	5.0087	5.4705	4.9705	5.7323	5.1999	5.0135	5.0634	5.0105	5.2727	5.5659	5.5662	5.5658	5.5744	pos_1394	metab_1391	251.139	3.0589	pos	-	-	-	-	-	0.00972374
metab_1392	-	-	-	3.6443	3.5428	3.7563	3.368	3.5783	3.7688	3.6774	3.1915	4.0546	3.8376	3.4031	3.5684	3.4239	3.9656	3.7438	3.5265	3.9029	3.1753	3.3574	3.6214	3.5659	3.5424	4.0068	3.4547	3.6583	3.6982	3.6826	3.6743	pos_1395	metab_1392	252.159	3.0589	pos	-	-	-	-	-	0.038339
metab_1393	-	-	-	3.9603	3.7127	3.5959	3.0804	3.7172	3.6928	3.9806	3.6608	3.6258	3.9263	3.8677	4.668	4.6059	4.52	4.459	4.2578	4.5799	4.1584	4.0922	4.3273	4.2026	4.2299	4.2819	4.2516	4.128	4.1289	4.1131	4.0987	pos_1396	metab_1393	420.212	3.0589	pos	-	-	-	-	-	0.0327074
metab_1394	-	-	-	4.5144	4.537	4.4104	4.1649	4.3577	4.2566	4.292	4.482	4.545	4.3825	4.576	3.6243	4.1043	3.9729	4.2934	4.308	3.9936	4.5697	4.5482	4.4913	4.4722	4.4652	4.3787	4.5149	4.371	4.3632	4.3551	4.357	pos_1397	metab_1394	511.276	3.0589	pos	-	-	-	-	-	0.0165724
metab_1395	-	-	-	4.5503	4.6145	4.5957	3.8462	4.8089	4.9178	4.866	5.0378	4.9463	4.6076	4.6907	5.3774	4.8109	4.8901	4.9123	4.5234	4.7939	4.4472	5.0599	4.6267	4.4143	4.5522	4.8655	4.6559	4.7921	4.7923	4.792	4.8081	pos_1398	metab_1395	186.091	3.0812	pos	-	-	-	-	-	0.0185877
metab_1396	-	-	-	4.3108	4.5587	4.3604	4.0855	4.2138	4.2	4.3503	4.3153	4.358	4.4398	4.3533	4.7266	4.4682	4.5067	4.5224	4.342	4.4645	4.2737	4.4519	4.3076	4.2923	4.2095	4.4991	4.3041	4.3701	4.3851	4.3932	4.3998	pos_1399	metab_1396	164.071	3.0812	pos	-	-	-	-	-	0.0292194
metab_1397	-	-	-	4.3904	4.3613	4.3435	4.0096	4.3874	4.2578	4.2915	4.2901	4.4057	4.3938	4.3987	4.7945	4.8059	4.7312	4.7382	4.6451	4.7526	4.6835	4.7723	4.6822	4.8045	4.7327	4.7503	4.6713	4.5594	4.5623	4.5771	4.5611	pos_1400	metab_1397	271.108	3.0812	pos	-	-	-	-	-	0.0190226
metab_1398	-	-	-	4.2384	4.1356	4.0504	3.9298	3.7633	3.7718	3.7868	4.1532	3.9772	3.7243	4.105	3.924	3.8501	3.6452	4.1356	4.0763	3.7668	4.2714	4.5903	4.322	3.8926	3.91	3.9162	4.0844	4.0556	4.0558	4.0714	4.061	pos_1401	metab_1398	303.155	3.0812	pos	-	-	-	-	-	0.017156
metab_1399	-	-	-	4.3648	4.1917	4.1811	4.1046	3.9706	4.0038	3.9674	4.2901	4.2367	3.9037	4.2826	4.3038	4.2256	4.1837	4.5038	4.3395	4.0921	4.4846	4.7975	4.5487	4.0028	4.069	4.1609	4.3402	4.2277	4.2425	4.2486	4.2503	pos_1402	metab_1399	367.148	3.0812	pos	-	-	-	-	-	0.0235179
metab_1400	-	-	-	5.3718	4.9632	5.1293	5.1235	5.3721	5.0622	4.8072	5.0739	5.3469	5.1043	5.2036	5.2885	5.2973	5.2689	5.314	5.2596	5.1346	5.2907	5.1602	5.3019	5.358	5.4298	5.3084	5.3767	5.2336	5.2337	5.229	5.211	pos_1403	metab_1400	437.171	3.0812	pos	-	-	-	-	-	0.0245134
metab_1401	-	-	-	2.8645	2.8675	2.4234	2.9435	4.096	2.888	4.146	2.9459	2.9976	4.3516	2.1431	4.7746	4.9613	4.8584	4.6741	5.0948	5.2302	3.6317	4.0219	3.9957	4.3783	4.0376	4.6236	4.1025	4.3995	4.3916	4.3867	4.3886	pos_1404	metab_1401	452.239	3.0812	pos	-	-	-	-	-	0.0130386
metab_1402	-	-	-	5.4067	5.4832	5.3118	5.0897	5.3606	5.2712	5.1803	5.3023	5.3423	5.4417	5.3806	5.0236	5.1568	5.0331	5.1455	5.1856	5.181	5.16	5.1217	5.1357	5.2344	5.1594	5.0937	5.1545	5.2584	5.2587	5.2559	5.2578	pos_1405	metab_1402	437.301	3.0812	pos	-	-	-	-	-	0.00285254
metab_1403	-	-	-	4.1535	4.2389	3.9974	3.7624	3.906	3.9607	4.1843	3.9555	4.0195	4.0658	4.0093	4.3206	4.3461	4.2617	4.3336	4.2711	4.389	4.3336	4.298	4.2837	4.6692	4.3818	4.2587	4.3031	4.2097	4.2021	4.215	4.217	pos_1406	metab_1403	249.16	3.1034	pos	-	-	-	-	-	0.0152711
metab_1404	-	-	-	3.8069	4.2083	4.3738	2.888	3.6156	3.546	3.6793	3.4739	3.5726	3.2821	3.4175	3.7343	3.6712	3.6849	3.7793	3.5107	3.6873	3.4329	3.2065	3.6004	3.4548	3.2106	3.5681	3.5115	3.5933	3.7085	3.6466	3.6657	pos_1407	metab_1404	303.12	3.1034	pos	-	-	-	-	-	0.108998
metab_1405	-	-	-	4.4405	4.7384	4.515	4.276	4.5085	4.6345	4.934	4.4912	4.5547	4.5862	4.6752	4.646	4.6417	4.579	4.6042	4.6792	4.7456	4.5081	4.5228	4.5401	4.5664	4.497	4.5924	4.5667	4.5912	4.5944	4.591	4.6076	pos_1408	metab_1405	279.17	3.1034	pos	-	-	-	-	-	0.0182242
metab_1406	-	-	-	3.9816	3.9669	3.7429	3.5532	3.7681	3.7649	3.7405	3.7193	3.7909	4.0425	3.7414	3.6703	3.9227	3.7667	3.9193	3.7168	3.8388	3.9594	3.8448	3.8163	3.9226	3.9083	3.7495	3.9491	3.8384	3.9052	3.8267	3.8281	pos_1409	metab_1406	435.322	3.1034	pos	-	-	-	-	-	0.0896527
metab_1407	-	-	-	4.092	4.197	4.0592	3.9747	4.548	4.4652	4.5938	4.1184	4.5585	4.4873	4.3897	4.9721	4.7913	4.8381	4.9007	4.7885	4.8993	4.4727	4.6322	4.722	4.5681	4.7469	4.7001	4.6254	4.5845	4.5847	4.5909	4.6024	pos_1410	metab_1407	216.138	3.1254	pos	-	-	-	-	-	0.0194523
metab_1408	-	-	-	3.7299	3.5045	3.3397	2.3729	3.128	2.8569	3.2593	3.1274	3.4032	3.2118	3.513	5.2411	5.0768	5.4938	5.4061	5.571	4.9042	3.122	2.9913	3.2069	3.2554	3.2497	3.3847	3.2627	4.6368	4.6389	4.6426	4.6464	pos_1411	metab_1408	285.076	3.1254	pos	-	-	-	-	-	0.00975762
metab_1409	-	-	-	4.1312	4.0824	4.5767	4.3525	3.5941	3.9207	4.0631	3.8743	4.3647	4.1184	3.8282	4.552	3.7368	4.3493	3.6404	2.9896	4.1082	3.4938	4.3295	4.2452	4.0588	4.2396	4.1172	4.2698	4.1498	4.1642	4.1688	4.1705	pos_1412	metab_1409	338.103	3.1254	pos	-	-	-	-	-	0.0214718
metab_1410	-	-	-	4.0371	4.1044	3.8848	3.7187	4.0567	3.8969	3.9854	3.9058	4.0878	4.0779	3.9921	3.7254	3.7265	3.5353	3.8816	3.8354	3.8432	3.8041	3.7137	3.6891	3.872	3.7754	3.7465	3.7829	3.8456	3.8448	3.8447	3.9029	pos_1413	metab_1410	355.212	3.1254	pos	-	-	-	-	-	0.0687787
metab_1411	-	-	-	4.0546	5.1581	4.6162	3.2022	4.016	3.1779	4.7133	4.8227	4.1082	4.9313	4.7032	2.6814	2.68	2.686	3.0557	2.6762	2.7071	3.2383	3.0447	2.8711	3.2488	2.8585	2.8015	2.9257	4.3413	4.3005	4.3	4.3111	pos_1414	metab_1411	548.203	3.1034	pos	-	-	-	-	-	0.0454837
metab_1412	-	-	-	4.9355	5.2716	4.8032	4.9629	4.9594	4.9569	4.9001	5.0826	4.886	5.2866	5.0646	3.9587	3.995	3.6957	3.9902	3.9126	4.1801	4.2459	3.965	4.0744	4.4108	4.3363	4.1971	4.2627	4.8102	4.8043	4.8123	4.8141	pos_1415	metab_1412	399.322	3.1034	pos	-	-	-	-	-	0.00979823
metab_1413	-	-	-	4.2491	3.7481	4.1668	3.7616	4.1814	4.019	3.1447	3.9422	4.1872	4.2304	4.0604	3.2577	3.4367	2.8422	3.3768	3.2818	3.7979	3.4968	3.8464	3.3041	3.4941	3.7	3.3563	3.5142	3.8388	3.8739	3.8653	3.8755	pos_1416	metab_1413	223.06	3.1476	pos	-	-	-	-	-	0.0384479
metab_1414	-	-	-	4.8667	4.7811	4.4234	4.5237	5.1054	5.052	5.1277	4.8243	5.3587	5.0169	5.042	5.5348	5.4312	5.6529	5.5611	5.1794	5.5922	5.0282	5.2117	5.2925	5.0964	5.1593	5.5755	5.1952	5.212	5.2122	5.2147	5.2165	pos_1417	metab_1414	273.123	3.1476	pos	-	-	-	-	-	0.00498773
metab_1415	-	-	-	3.9985	3.9286	3.8306	3.6513	3.8219	3.6672	3.783	3.6232	3.7965	3.923	3.8349	3.7627	3.7344	3.8383	3.76	3.8401	3.8122	3.6865	3.6865	3.717	3.8363	3.8426	3.6679	3.8163	3.74	3.7404	3.7398	3.7884	pos_1418	metab_1415	394.259	3.1034	pos	-	-	-	-	-	0.0571716
metab_1416	-	-	-	4.4181	4.3673	4.2537	4.0269	4.2013	4.2002	4.2854	4.3351	4.4714	4.1925	4.3817	4.4662	4.3952	4.4395	4.5209	4.3415	4.4135	4.4437	4.6974	4.5534	4.2575	4.2762	4.5213	4.4022	4.3783	4.4059	4.4052	4.4067	pos_1419	metab_1416	257.149	3.1034	pos	-	-	-	-	-	0.0312826
metab_1417	-	-	-	3.7945	4.1724	3.5803	3.3668	3.805	4.0079	3.9151	3.8824	3.9156	4.0204	4.0913	4.1039	3.9782	3.8996	3.802	3.9494	4.0093	3.7842	3.8966	3.9677	3.8484	3.8396	3.8983	3.9016	3.8737	3.9011	3.9007	3.9026	pos_1420	metab_1417	247.144	3.1034	pos	-	-	-	-	-	0.0316068
metab_1418	-	-	-	3.173	2.9525	2.6966	3.9022	2.7946	2.6741	2.5629	2.74	2.9476	3.2496	2.8612	1.9301	3.228	1.9347	2.5413	1.925	2.8678	1.9229	1.8932	3.0828	4.6744	4.8147	1.9461	2.2197	3.4954	3.4952	3.5495	3.5113	pos_1421	metab_1418	470.265	3.1476	pos	-	-	-	-	-	0.0602615
metab_1419	-	-	-	4.3943	4.2469	4.1609	3.9929	4.0996	4.1552	4.2786	4.089	4.2804	4.307	4.1892	4.872	4.7912	4.8402	4.8966	4.8215	4.6417	4.2875	4.4022	4.3183	4.3185	4.2523	4.3096	4.4119	4.4015	4.4017	4.4068	4.4086	pos_1422	metab_1419	233.128	3.1699	pos	-	-	-	-	-	0.00835888
metab_1420	-	-	-	3.9442	3.7814	4.1144	3.8693	4.0235	3.8952	4.3454	3.9756	4.0602	4.1388	3.9732	4.4646	4.4589	4.2339	4.2277	4.0646	3.9634	4.0938	3.8847	4.4857	4.3	4.065	4.9639	4.3413	4.2356	4.2461	4.2568	4.2583	pos_1423	metab_1420	249.112	3.1699	pos	-	-	-	-	-	0.0242514
metab_1421	-	-	-	4.1068	4.1602	4.0357	3.8252	4.1381	4.0941	4.1899	3.96	4.3284	4.1216	4.0524	4.4846	4.5	4.4796	4.4509	4.5721	4.5153	4.4469	4.4366	4.4577	4.504	4.4843	4.5116	4.5129	4.3203	4.3256	4.3311	4.3329	pos_1424	metab_1421	273.16	3.1699	pos	-	-	-	-	-	0.0130957
metab_1422	-	-	-	4.0445	3.5589	3.4088	3.1511	3.3929	3.438	3.6204	3.2791	3.611	3.3509	3.3843	4.2134	4.1879	4.1896	4.2024	4.1599	4.0903	3.9322	4.203	3.9631	5.0336	4.5063	3.9418	3.9868	4.1648	4.1635	4.1744	4.1835	pos_1425	metab_1422	237.16	3.1699	pos	-	-	-	-	-	0.0215871
metab_1423	-	-	-	3.8258	3.5332	3.7182	3.5002	3.762	3.7495	3.5984	3.5422	3.8788	3.8663	3.6678	3.0453	3.3327	3.6275	3.693	3.7008	3.3271	3.6021	3.353	3.4295	3.4935	3.1594	3.5108	3.3951	3.5221	3.604	3.6258	3.6263	pos_1426	metab_1423	229.122	3.1034	pos	-	-	-	-	-	0.107982
metab_1424	-	-	-	4.4525	4.0305	4.0892	4.0234	4.36	4.202	4.1905	4.1916	4.3028	4.3977	4.2905	4.7924	4.7144	4.7236	4.7457	4.5961	4.5215	4.4729	4.0006	4.6811	4.5829	4.0571	4.9069	4.3988	4.4358	4.462	4.3902	4.4452	pos_1427	metab_1424	417.154	3.0812	pos	-	-	-	-	-	0.0690482
metab_1425	-	-	-	3.8195	4.0673	3.8267	3.7134	3.8429	4.0932	3.4223	3.8124	3.7965	4.0922	3.976	1.0021	3.0271	1.9818	1.0108	3.0688	3.7087	0.9955	3.4004	2.6398	2.9657	2.8808	2.5809	1.0105	3.6062	3.6351	3.583	3.5804	pos_1428	metab_1425	589.266	3.1699	pos	-	-	-	-	-	0.0592964
metab_1426	-	-	-	3.7492	3.5558	3.5219	3.15	3.6008	3.7819	3.6554	3.5676	3.8908	3.7262	3.6424	5.5527	5.5216	5.7377	5.8297	5.9075	5.6297	3.857	3.6001	3.7138	3.5665	3.627	3.8035	3.6488	5.0502	5.0499	5.0569	5.0601	pos_1429	metab_1426	255.065	3.1921	pos	-	-	-	-	-	0.0116249
metab_1427	-	-	-	4.6076	3.7546	3.7783	4.0284	3.3327	3.4155	3.5208	3.0558	3.4479	3.5499	3.2524	3.7211	3.5809	3.6954	3.5986	3.6502	3.9302	3.987	3.5119	3.9396	5.8744	4.9049	4.3888	3.7339	4.7618	4.7687	4.7751	4.7781	pos_1430	metab_1427	267.17	3.1921	pos	-	-	-	-	-	0.016609
metab_1428	-	-	-	4.3681	4.0916	4.3317	4.244	4.053	4.0728	4.1648	4.1631	4.2456	4.2171	4.1077	4.1296	4.1352	4.1033	4.1509	4.0513	4.0492	4.0611	4.1464	4.1652	4.1425	4.194	4.286	4.3022	4.1447	4.1577	4.1454	4.1978	pos_1431	metab_1428	301.118	3.1921	pos	-	-	-	-	-	0.0588937
metab_1429	-	-	-	5.5303	5.4912	5.336	4.9709	5.4561	5.288	5.3297	5.3748	5.4776	5.4667	5.4324	5.3868	5.4723	5.3893	5.4419	5.4983	5.4427	5.4875	5.3947	5.4452	5.5707	5.4392	5.4256	5.4672	5.4108	5.4193	5.4107	5.4142	pos_1432	metab_1429	421.306	3.1921	pos	-	-	-	-	-	0.00934209
metab_1430	-	-	-	4.4168	4.5283	4.1876	2.9895	3.9801	4.3244	3.6035	4.6035	4.2726	3.9522	4.3712	4.177	3.8223	3.8702	4.2119	4.0411	3.9596	4.4152	4.2286	4.4601	4.3591	4.2219	4.3783	4.2016	4.2154	4.2662	4.2154	4.2167	pos_1433	metab_1430	528.339	3.1699	pos	-	-	-	-	-	0.0596849
metab_1431	-	-	-	4.3457	4.284	4.2296	4.1423	4.336	4.2842	4.4144	4.1737	4.3809	4.3932	4.278	4.1661	4.0437	4.102	4.0601	4.1259	4.1605	4.098	4.0755	4.1246	4.0956	4.0717	4.1949	4.2222	4.2073	4.2075	4.2127	4.2269	pos_1434	metab_1431	221.154	3.2144	pos	-	-	-	-	-	0.0213764
metab_1432	-	-	-	2.1078	2.049	2.8129	3.3262	4.2458	4.1932	3.7807	1.9703	2.0896	5.0248	2.3315	5.2224	5.1155	5.0905	4.9034	4.6657	5.2707	2.0905	3.2968	3.1598	4.5278	4.5664	4.6159	4.139	4.4345	4.4351	4.4209	4.4207	pos_1435	metab_1432	650.34	3.1921	pos	-	-	-	-	-	0.0186229
metab_1433	-	-	-	4.8237	4.7566	4.7081	4.5286	4.7817	4.6391	4.7144	4.6374	4.8712	4.8354	4.7011	4.4658	4.3902	4.3871	4.4198	4.4846	4.5615	4.6222	4.6201	4.595	4.687	4.5055	4.6631	4.6869	4.6366	4.6473	4.6481	4.6431	pos_1436	metab_1433	391.259	3.2144	pos	-	-	-	-	-	0.0121257
metab_1434	-	-	-	4.0962	3.5421	4.3057	2.6924	3.3429	3.0684	3.5041	4.6999	3.2592	3.6743	3.2676	4.2827	4.3479	4.25	3.7336	3.2206	4.3981	3.6808	3.4904	3.5011	2.9796	3.2317	3.281	3.2755	3.7199	3.7105	3.7095	3.7114	pos_1437	metab_1434	557.259	3.2144	pos	-	-	-	-	-	0.0110631
metab_1435	-	-	-	3.8907	3.7335	3.7126	3.6738	3.8094	3.7354	3.9458	3.6282	3.9271	3.8631	3.7442	4.1618	4.2149	4.1005	4.1686	4.0828	3.9788	4.2924	3.7628	4.2474	4.4852	4.0787	4.3883	4.3301	3.9848	4.0191	4.0108	4.0207	pos_1438	metab_1435	209.081	3.2369	pos	-	-	-	-	-	0.0376574
metab_1436	-	-	-	4.0446	3.9298	3.9324	3.8061	3.8844	3.9236	3.8964	3.8009	3.9312	3.9556	3.8541	3.925	3.845	3.8631	3.8362	3.7948	3.8588	3.7473	3.7561	3.695	3.7701	3.6358	3.889	3.8635	3.8683	3.8853	3.8811	3.8868	pos_1439	metab_1436	205.122	3.2369	pos	-	-	-	-	-	0.0191312
metab_1437	-	-	-	4.7442	4.717	4.6224	4.4472	4.6911	4.6206	4.659	4.566	4.7354	4.8122	4.6755	4.7055	4.655	4.6642	4.6811	4.6611	4.698	4.6935	4.659	4.6462	4.7573	4.6779	4.7186	4.7332	4.6699	4.6873	4.682	4.6912	pos_1440	metab_1437	273.185	3.2369	pos	-	-	-	-	-	0.0212457
metab_1438	-	-	-	3.5217	3.056	2.6333	1.6058	4.0168	2.8534	3.1599	2.8825	3.5322	4.9541	2.7321	5.7088	5.6342	5.6145	5.1791	4.1496	5.6905	2.921	3.128	2.8405	3.9795	3.6743	3.6517	2.9037	4.7944	4.7701	4.7696	4.7714	pos_1441	metab_1438	571.274	3.2369	pos	-	-	-	-	-	0.0280618
metab_1439	-	-	-	2.7311	2.6379	2.6334	2.4999	2.6857	2.6133	2.606	2.5927	2.7128	2.7123	2.6461	3.7618	4.1352	3.9493	4.2103	4.2171	2.7301	2.7137	3.0297	4.0553	4.3095	3.9098	2.7371	4.0789	3.5594	3.556	3.5593	3.5575	pos_1442	metab_1439	296.124	3.2591	pos	-	-	-	-	-	0.00368589
metab_1440	-	-	-	3.9404	4.0293	3.819	3.7142	3.7636	3.6564	3.7713	3.7316	3.7396	3.9142	3.7368	3.923	3.9491	3.9597	3.9414	3.9904	3.9718	3.9174	4.0875	4.0763	4.0828	3.9164	3.8733	4.1003	3.8468	3.8472	3.8545	3.8751	pos_1443	metab_1440	245.149	3.2591	pos	-	-	-	-	-	0.0309217
metab_1441	-	-	-	3.5279	3.4135	3.5245	3.0689	2.8435	3.294	3.2623	3.0392	3.3362	2.7552	3.1201	4.2441	4.4225	4.3144	4.4645	4.4453	4.0321	3.8807	4.3026	4.5316	4.5515	4.4543	4.1331	4.4827	3.9974	3.9976	4.0249	4.0075	pos_1444	metab_1441	367.161	3.2591	pos	-	-	-	-	-	0.0300254
metab_1442	-	-	-	3.4925	3.6412	3.5391	3.1604	3.7125	3.4035	3.6641	3.3005	3.6404	3.7861	3.5631	4.5261	4.6212	4.6156	4.587	4.763	4.2585	4.5518	4.3926	4.5812	4.4685	4.4807	4.5316	4.6725	4.2408	4.2464	4.2262	4.2478	pos_1445	metab_1442	423.202	3.2591	pos	-	-	-	-	-	0.0225192
metab_1443	-	-	-	4.5138	4.5765	4.3546	4.1371	4.5467	4.38	4.4324	4.4219	4.4611	4.9472	4.373	5.5412	5.4248	5.4175	5.1086	4.7565	5.5002	4.6101	4.5067	4.5228	4.7385	4.6364	4.6728	4.6657	4.858	4.8547	4.8507	4.8525	pos_1446	metab_1443	434.229	3.2591	pos	-	-	-	-	-	0.00724211
metab_1444	-	-	-	2.2922	3.5302	4.037	3.3574	2.727	3.9985	4.0298	3.4484	2.2283	2.2278	2.162	3.8511	4.4895	4.354	4.4841	4.4602	2.5267	3.025	2.9986	4.3052	4.5326	4.1315	2.8842	4.2306	3.8906	3.8904	3.788	3.8927	pos_1447	metab_1444	659.318	3.2591	pos	-	-	-	-	-	0.111776
2-phenyl-3,4-dihydro-2H-1-benzopyran-3,5,7-triol	-	HMDB0132266	C15H14O4	3.6023	3.4305	3.592	3.2757	4.5125	4.4916	4.3714	4.8921	5.0759	4.4293	4.9313	3.7917	3.7539	3.8701	3.9229	3.7328	3.9426	3.8767	4.2477	3.7705	3.9702	3.767	4.0241	3.8755	4.3116	4.3201	4.3115	4.3444	pos_1448	metab_1445	300.123	3.2815	pos	M+H, M+ACN+H	-	65.4	0.55233	-	0.0362494
metab_1446	-	-	-	4.1882	4.0937	3.9209	4.0499	3.6127	3.2381	3.6088	3.307	3.7982	3.2826	3.2979	3.8941	3.7633	3.8647	3.9208	3.9582	3.8474	3.827	4.0709	4.0083	3.9438	3.9357	4.0113	4.101	3.8132	3.7899	3.8151	3.817	pos_1449	metab_1446	322.212	3.2815	pos	-	-	-	-	-	0.0288269
metab_1447	-	-	-	5.6375	5.4546	5.4991	5.4313	5.6046	5.4045	5.553	5.4065	5.8097	5.4838	5.5046	5.3211	5.1438	5.1839	5.1911	5.3155	5.4241	5.4225	5.5082	5.4874	5.5269	5.3638	5.5655	5.5638	5.4565	5.4639	5.4608	5.4657	pos_1450	metab_1447	393.275	3.2815	pos	-	-	-	-	-	0.00930814
metab_1448	-	-	-	3.3836	3.5211	3.2501	3.1367	3.202	2.8603	3.1815	3.3551	3.3256	3.5357	3.1954	3.5426	3.7907	3.6214	3.6421	3.8609	3.693	3.8621	3.5859	3.7126	3.8947	3.694	3.7991	3.6474	3.5235	3.563	3.5232	3.539	pos_1451	metab_1448	296.186	3.2815	pos	-	-	-	-	-	0.0437614
metab_1449	-	-	-	4.1758	4.1188	3.9879	3.8316	4.1344	3.9346	4.0318	4.0425	4.1134	4.2005	4.0596	4.1749	4.2054	4.1996	4.2331	4.2244	4.1923	4.2403	4.1474	4.1865	4.2625	4.1632	4.2398	4.1801	4.121	4.1212	4.1209	4.1482	pos_1452	metab_1449	208.06	3.2815	pos	-	-	-	-	-	0.0318012
metab_1450	-	-	-	4.8854	5.3702	4.7972	4.7691	5.1347	5.0673	5.0968	4.7901	5.0203	5.5409	4.9034	5.9798	5.7579	5.7643	5.4796	5.1649	5.879	4.9331	4.995	4.9806	5.2348	5.2138	5.2072	5.0455	5.3174	5.3177	5.3226	5.3404	pos_1453	metab_1450	263.139	3.3037	pos	-	-	-	-	-	0.0251941
metab_1451	-	-	-	3.6202	3.2121	3.5363	3.7655	2.9374	2.8604	2.4003	2.8831	2.8141	3.6855	2.9597	2.8222	2.5932	2.5198	2.827	3.0543	3.2432	3.0882	3.305	3.2636	4.6559	4.6871	3.3381	3.2947	3.4498	3.4189	3.4513	3.4533	pos_1454	metab_1451	465.236	3.2591	pos	-	-	-	-	-	0.0369075
metab_1452	-	-	-	4.3505	4.3719	4.2273	3.7909	4.1753	4.1591	4.3054	4.0801	4.4199	4.3295	4.1758	4.2504	4.239	4.1926	4.1884	4.1673	4.1958	4.1634	4.0834	4.1177	4.2152	4.1487	4.1797	4.0805	4.1491	4.1506	4.1491	4.1682	pos_1455	metab_1452	375.192	3.3037	pos	-	-	-	-	-	0.0216552
metab_1453	-	-	-	3.4226	2.9443	0.0802	3.1151	4.5199	4.3416	4.5002	2.81	3.5339	4.2786	3.23	4.9821	4.6261	4.8117	4.4841	4.5276	4.8363	3.9814	4.0507	4.1897	4.5553	4.3356	4.5562	4.1302	4.2212	4.2831	4.2827	4.2826	pos_1456	metab_1453	499.253	3.3037	pos	-	-	-	-	-	0.0683628
metab_1454	-	-	-	4.4609	4.4986	4.2962	3.8532	4.3314	4.1556	4.2845	4.4104	4.4422	4.3136	4.3205	3.3087	3.572	3.5677	4.0082	4.0491	3.3828	4.164	4.197	4.1864	4.3343	4.153	4.1056	4.2826	4.1979	4.1982	4.1951	4.1969	pos_1457	metab_1454	525.292	3.3037	pos	-	-	-	-	-	0.00322266
metab_1455	-	-	-	4.3922	4.5141	4.3941	4.0586	4.4196	4.2797	4.1933	4.3215	4.2834	4.3878	4.3255	4.2738	4.1939	4.1736	4.3237	4.0424	4.2541	4.2533	4.1409	4.2604	4.3491	4.3148	4.2808	4.1931	4.2618	4.2596	4.2654	4.2731	pos_1458	metab_1455	363.264	3.3037	pos	-	-	-	-	-	0.013767
metab_1456	-	-	-	3.589	3.597	2.8411	3.113	4.2184	4.0861	4.245	3.1313	3.6718	4.0501	2.8239	4.6668	4.2653	4.3851	4.1804	4.2533	4.4926	3.8188	3.9923	4.0242	4.3175	4.0453	4.2335	4.0687	4.0309	4.025	4.0439	4.064	pos_1459	metab_1456	362.207	3.3037	pos	-	-	-	-	-	0.0400794
metab_1457	-	-	-	4.3342	4.2566	4.0746	4.0741	4.2457	4.117	4.1369	4.1829	4.2958	4.3316	4.2797	4.4115	4.3532	4.3181	4.287	4.4902	4.4644	4.3167	4.1339	4.1479	4.1556	4.3151	4.2961	4.2008	4.1991	4.1998	4.2297	4.2106	pos_1460	metab_1457	401.215	3.326	pos	-	-	-	-	-	0.0331652
3-hydroxytridecanoyl carnitine	-	HMDB0061639	C20H39NO5	5.2236	5.2917	5.1394	4.8893	5.1182	5.0044	4.9942	5.0839	5.0809	5.1481	5.1112	4.7372	5.0058	4.886	5.1185	5.311	4.9749	5.3471	5.3737	5.3038	5.3771	5.2766	5.3111	5.3567	5.164	5.142	5.1638	5.1593	pos_1461	metab_1458	418.255	3.326	pos	M+ACN+H, M+2Na-H	-	61.1	0.223198	-	0.0236837
metab_1459	-	-	-	3.8973	4.0895	3.912	3.8251	3.9425	4.0764	4.058	3.9372	4.1664	4.1759	3.9792	3.8645	3.8208	3.683	3.7505	3.863	3.9187	4.1191	3.9093	4.1694	4.2671	4.1112	4.1401	4.1142	4.0513	3.9979	3.9979	4.0094	pos_1462	metab_1459	312.217	3.3481	pos	-	-	-	-	-	0.0598622
metab_1460	-	-	-	4.3738	4.3826	4.1586	4.0234	4.27	4.1774	4.3164	4.177	4.3174	4.3165	4.3104	4.6029	4.3194	4.3465	4.3106	4.3021	4.3334	4.2555	4.4068	4.3121	4.2875	4.231	4.2454	4.4426	4.3016	4.2815	4.2813	4.2899	pos_1463	metab_1460	345.144	3.3481	pos	-	-	-	-	-	0.0222474
metab_1461	-	-	-	4.0087	3.7669	3.744	2.9473	3.5912	3.3739	3.3643	3.4456	1.9592	3.6396	3.6021	3.4491	3.4486	3.3901	3.1672	3.3206	3.2188	3.1376	3.4286	2.9125	3.3642	3.1653	3.1079	3.27	3.4322	3.4281	3.437	3.3819	pos_1464	metab_1461	423.232	3.3481	pos	-	-	-	-	-	0.0571207
metab_1462	-	-	-	4.1504	4.126	4.063	3.7674	4.0913	3.8998	3.7692	4.0332	4.092	4.1524	4.0854	4.19	4.3064	4.1775	4.1927	4.3068	4.3037	4.3042	4.1806	4.2042	4.4039	4.2594	4.2568	4.1966	4.1611	4.1297	4.1267	4.1285	pos_1465	metab_1462	464.276	3.3481	pos	-	-	-	-	-	0.0385518
[truncated: 20,895 more rows]
